# Supplementary material for: Macrophages Release Extracellular Vesicles of Different Properties and Composition Following Exposure to Nanoparticles
Source: Int J Mol Sci. 2022 Dec 23;24(1):260. doi: 10.3390/ijms24010260 (PMC9820242; doi:10.3390/ijms24010260)
Supplement: Supplementary file 1 [file ijms-24-00260-s001.zip › Deville et al Table S3.xlsx]

## Sheet: Untreated 001
Checked	Master	Accession	Description	Coverage	# Peptides	# PSMs	# Protein Unique Peptides	# Protein Groups	# AAs	MW [kDa]	calc. pI	Found in Sample: [S1] F1: Sample	Modifications	Protein FDR Confidence Sequest HT	Exp. q-value Sequest HT	Score Sequest HT	# Peptides Sequest HT	Protein FDR Confidence Mascot	Exp. q-value Mascot	Score Mascot	# Peptides Mascot
FALSE	Master Protein	O08992	Syntenin-1 OS=Mus musculus GN=Sdcbp PE=1 SV=1	61.204	13	99	0	1	299	32.4	7.15	High		High	0	236.82	10	High	0	2358	13
	Checked	Confidence	Identifying Node	Annotated Sequence	Modifications	# Protein Groups	# Proteins	Master Protein Accessions	Protein Accessions	# Missed Cleavages	Charge	DeltaScore	DeltaCn	Rank	Search Engine Rank	m/z [Da]	MH+ [Da]	DeltaM [ppm]	Deltam/z [Da]	Intensity	Activation Type	MS Order	Isolation Interference [%]	Ion Inject Time [ms]	RT [min]	First Scan	Spectrum File	Ions Matched	XCorr	Ions Score	Identity Strict	Identity Relaxed	Expectation Value	Area	Apex RT [min]
	FALSE	High	Sequest HT (A2)	[K].DAQIADILSTAGTVVTITIMPTFIFEHIIKR.[M]		1	1	O08992	O08992	1	4	0.8643	0	1	1	854.474	3414.87	1.07	0.00091	1.81298e+06	HCD (High Energy Collision Dissociation)	MS2	1.59684	80	92.0639	38475	A001.raw	0/0	8.03					6.7991e+07	92.07
	FALSE	High	Sequest HT (A2)	[K].DAQIADILSTAGTVVTITIMPTFIFEHIIKR.[M]		1	1	O08992	O08992	1	4	0.8694	0	1	1	854.473	3414.87	0.35	0.0003	792926	HCD (High Energy Collision Dissociation)	MS2	0.546354	80	92.4141	38620	A001.raw	0/0	7.81					504558	92.39
	FALSE	High	Sequest HT (A2)	[K].VIQAQTAYSANPASQAFVLVDASAALPPDGNLYPK.[L]		1	1	O08992	O08992	0	3	0.7979	0	1	1	1196.61	3587.83	-3.25	-0.00388	954857	HCD (High Energy Collision Dissociation)	MS2	0	80	64.1884	26100	A001.raw	0/0	7.72					2.08947e+07	64.26
	FALSE	High	Sequest HT (A2)	[R].LKSIDNGIFVQLVQANSPASLVGLR.[F]		1	1	O08992	O08992	1	3	0.756	0	1	1	880.5	2639.49	-0.45	-0.00039	3234818	HCD (High Energy Collision Dissociation)	MS2	6.66131	80	65.5633	26763	A001.raw	0/0	7.13					2.07328e+07	65.48
	FALSE	High	Sequest HT (A2)	[K].VIQAQTAYSANPASQAFVLVDASAALPPDGNLYPK.[L]		1	1	O08992	O08992	0	3	0.8419	0	1	1	1196.62	3587.85	1.96	0.00234	585239	HCD (High Energy Collision Dissociation)	MS2	0	80	63.8239	25924	A001.raw	0/0	6.83					7.61998e+06	63.78
	FALSE	High	Sequest HT (A2)	[K].DAQIADILSTAGTVVTITIMPTFIFEHIIKR.[M]		1	1	O08992	O08992	1	3	0.8772	0	1	1	1138.96	3414.87	0.84	0.00095	306319	HCD (High Energy Collision Dissociation)	MS2	0	80	92.3462	38589	A001.raw	0/0	6.68					6984114	92.17
	FALSE	High	Sequest HT (A2)	[K].DAQIADILSTAGTVVTITIMPTFIFEHIIKR.[M]		1	1	O08992	O08992	1	5	0.8399	0	1	1	683.779	3414.87	-1.37	-0.00093	222754	HCD (High Energy Collision Dissociation)	MS2	2.83355	80	92.0445	38466	A001.raw	0/0	6.56					1.15954e+07	92.05
	FALSE	High	Sequest HT (A2)	[K].DAQIADILSTAGTVVTITIMPTFIFEHIIKR.[M]		1	1	O08992	O08992	1	3	0.8043	0	1	1	1138.96	3414.86	-2.49	-0.00283	511388	HCD (High Energy Collision Dissociation)	MS2	0	80	92.0092	38452	A001.raw	0/0	6.49					3.63442e+07	91.88
	FALSE	High	Sequest HT (A2)	[K].VIQAQTAYSANPASQAFVLVDASAALPPDGNLYPK.[L]		1	1	O08992	O08992	0	3	0.8145	0	1	1	1196.62	3587.85	2.16	0.00259	460521	HCD (High Energy Collision Dissociation)	MS2	0	80	64.5465	26273	A001.raw	0/0	6.47					1.75284e+07	64.58
	FALSE	High	Sequest HT (A2)	[K].DAQIADILSTAGTVVTITIMPTFIFEHIIKR.[M]		1	1	O08992	O08992	1	4	0.8132	0	1	1	854.472	3414.87	-1.29	-0.0011	163664	HCD (High Energy Collision Dissociation)	MS2	3.086	80	92.7543	38769	A001.raw	0/0	6.37					1.33684e+06	92.72
	FALSE	High	Sequest HT (A2)	[K].DAQIADILSTAGTVVTITIMPTFIFEHIIK.[R]		1	1	O08992	O08992	0	3	0.7553	0	1	1	1086.93	3258.76	-2.14	-0.00233	472869	HCD (High Energy Collision Dissociation)	MS2	1.59192	80	96.5235	40397	A001.raw	0/0	6.09					998338	96.46
	FALSE	High	Sequest HT (A2)	[R].LKSIDNGIFVQLVQANSPASLVGLR.[F]		1	1	O08992	O08992	1	3	0.7792	0	1	1	880.5	2639.48	-1.28	-0.00113	1.65464e+06	HCD (High Energy Collision Dissociation)	MS2	9.01026	80	65.9239	26937	A001.raw	0/0	6.07					2.25196e+06	65.87
	FALSE	High	Sequest HT (A2)	[R].NGLLTDHHIcEINGQNVIGLK.[D]	C10(Carbamidomethyl)	1	1	O08992	O08992	0	3	0.7591	0	1	1	782.405	2345.2	-1.38	-0.00108	1.52689e+06	HCD (High Energy Collision Dissociation)	MS2	1.72667	80	45.5346	16917	A001.raw	0/0	6.02					6.80307e+06	45.57
	FALSE	High	Sequest HT (A2)	[R].FGDQVLQINGENcAGWSSDKAHK.[V]	C13(Carbamidomethyl)	1	1	O08992	O08992	1	4	0.7831	0	1	1	641.05	2561.18	-1.63	-0.00104	934594	HCD (High Energy Collision Dissociation)	MS2	0	80	40.458	14433	A001.raw	0/0	5.81
	FALSE	High	Sequest HT (A2)	[K].DAQIADILSTAGTVVTITIMPTFIFEHIIKR.[M]		1	1	O08992	O08992	1	5	0.8812	0	1	1	683.78	3414.87	-0.47	-0.00032	292159	HCD (High Energy Collision Dissociation)	MS2	2.36759	80	92.3847	38607	A001.raw	0/0	5.81					3.64534e+06	92.37
	FALSE	High	Sequest HT (A2)	[K].DAQIADILSTAGTVVTITIMPTFIFEHIIK.[R]		1	1	O08992	O08992	0	4	0.7397	0	1	1	815.448	3258.77	0.01	0	394832	HCD (High Energy Collision Dissociation)	MS2	1.81851	80	96.9433	40581	A001.raw	0/0	5.8					9.96094e+06	96.84
	FALSE	High	Sequest HT (A2)	[R].NGLLTDHHIcEINGQNVIGLK.[D]	C10(Carbamidomethyl)	1	1	O08992	O08992	0	3	0.815	0	1	1	782.405	2345.2	-0.91	-0.00071	730882	HCD (High Energy Collision Dissociation)	MS2	8.56609	80	45.1899	16745	A001.raw	0/0	5.73					5.60263e+07	45.31
	FALSE	High	Sequest HT (A2)	[K].DAQIADILSTAGTVVTITIMPTFIFEHIIK.[R]		1	1	O08992	O08992	0	4	0.7877	0	1	1	815.449	3258.77	1.2	0.00098	279212	HCD (High Energy Collision Dissociation)	MS2	0	80	96.6055	40433	A001.raw	0/0	5.7					4.79162e+06	96.67
	FALSE	High	Sequest HT (A2)	[R].FGDQVLQINGENcAGWSSDKAHK.[V]	C13(Carbamidomethyl)	1	1	O08992	O08992	1	4	0.781	0	1	1	641.051	2561.18	-0.01	-1e-05	693049	HCD (High Energy Collision Dissociation)	MS2	5.76709	80	40.8179	14609	A001.raw	0/0	5.57					3.718e+06	40.84
	FALSE	High	Sequest HT (A2)	[K].SIDNGIFVQLVQANSPASLVGLR.[F]		1	1	O08992	O08992	0	3	0.8388	0	1	1	800.108	2398.31	0.5	0.0004	2.99907e+06	HCD (High Energy Collision Dissociation)	MS2	1.71144	80	68.7753	28301	A001.raw	0/0	5.46					1.76222e+07	68.63
	FALSE	High	Sequest HT (A2)	[K].SIDNGIFVQLVQANSPASLVGLR.[F]		1	1	O08992	O08992	0	2	0.7638	0	1	1	1199.66	2398.31	0	0	701361	HCD (High Energy Collision Dissociation)	MS2	0	80	68.4782	28159	A001.raw	0/0	5.42					5.47454e+06	68.54
	FALSE	High	Sequest HT (A2)	[K].VIQAQTAYSANPASQAFVLVDASAALPPDGNLYPK.[L]		1	1	O08992	O08992	0	3	0.8056	0	1	1	1196.62	3587.85	2.67	0.0032	294407	HCD (High Energy Collision Dissociation)	MS2	0	80	65.6069	26784	A001.raw	0/0	5.35					2.71107e+06	65.65
	FALSE	High	Sequest HT (A2)	[R].LKSIDNGIFVQLVQANSPASLVGLR.[F]		1	1	O08992	O08992	1	3	0.6465	0	1	1	880.501	2639.49	-0.31	-0.00027	2.26467e+06	HCD (High Energy Collision Dissociation)	MS2	41.4137	42.694	65.208	26593	A001.raw	0/0	5.29					2.43828e+07	65.13
	FALSE	High	Sequest HT (A2)	[K].SIDNGIFVQLVQANSPASLVGLR.[F]		1	1	O08992	O08992	0	3	0.8382	0	1	1	800.108	2398.31	0.66	0.00053	1.88444e+06	HCD (High Energy Collision Dissociation)	MS2	0.975263	80	68.4304	28136	A001.raw	0/0	5.19
	FALSE	High	Sequest HT (A2)	[K].DAQIADILSTAGTVVTITIMPTFIFEHIIK.[R]		1	1	O08992	O08992	0	3	0.7553	0	1	1	1086.93	3258.77	0.22	0.00023	721638	HCD (High Energy Collision Dissociation)	MS2	0	80	96.8708	40549	A001.raw	0/0	5.19					1.78375e+06	96.88
	FALSE	High	Sequest HT (A2)	[K].SIDNGIFVQLVQANSPASLVGLR.[F]		1	1	O08992	O08992	0	2	0.7367	0	1	1	1199.66	2398.3	-2.04	-0.00244	1.00795e+06	HCD (High Energy Collision Dissociation)	MS2	3.31989	80	68.8233	28324	A001.raw	0/0	5.09					1.16842e+07	68.78
	FALSE	High	Sequest HT (A2)	[K].DAQIADILSTAGTVVTITIMPTFIFEHIIK.[R]		1	1	O08992	O08992	0	3	0.756	0	1	1	1086.92	3258.76	-4.06	-0.0044	216126	HCD (High Energy Collision Dissociation)	MS2	0	80	97.2105	40696	A001.raw	0/0	5.04					3.30728e+06	97.06
	FALSE	High	Sequest HT (A2)	[K].QGIREVILcKDQDGK.[I]	C9(Carbamidomethyl)	1	1	O08992	O08992	2	3	0.6992	0	1	1	586.977	1758.92	0.68	0.0004	896711	HCD (High Energy Collision Dissociation)	MS2	10.7746	76.455	29.4022	9110	A001.raw	0/0	5.02					3.46943e+06	29.36
	FALSE	High	Sequest HT (A2)	[K].DAQIADILSTAGTVVTITIMPTFIFEHIIKR.[M]		1	1	O08992	O08992	1	3	0.8516	0	1	1	1138.96	3414.86	-1.95	-0.00222	296622	HCD (High Energy Collision Dissociation)	MS2	6.29141	80	92.6905	38740	A001.raw	0/0	4.92					1.48933e+06	92.69
	FALSE	High	Sequest HT (A2)	[K].SIDNGIFVQLVQANSPASLVGLR.[F]		1	1	O08992	O08992	0	3	0.8009	0	1	1	800.108	2398.31	0.35	0.00028	997857	HCD (High Energy Collision Dissociation)	MS2	0.617397	80	69.1295	28471	A001.raw	0/0	4.62					3.33132e+06	69.14
	FALSE	High	Sequest HT (A2)	[K].SIDNGIFVQLVQANSPASLVGLR.[F]		1	1	O08992	O08992	0	2	0.8581	0	1	1	1199.66	2398.32	4.79	0.00574	68332	HCD (High Energy Collision Dissociation)	MS2	13.5338	80	68.1165	27986	A001.raw	0/0	4.44					906312	68.11
	FALSE	High	Sequest HT (A2)	[R].NGLLTDHHIcEINGQNVIGLK.[D]	C10(Carbamidomethyl)	1	1	O08992	O08992	0	4	0.7506	0	1	1	587.056	2345.2	-0.63	-0.00037	1.50055e+06	HCD (High Energy Collision Dissociation)	MS2	3.15657	41.012	45.8096	17056	A001.raw	0/0	4.17					1.43948e+07	45.9
	FALSE	High	Sequest HT (A2)	[K].DAQIADILSTAGTVVTITIMPTFIFEHIIKR.[M]		1	1	O08992	O08992	1	3	0.8668	0	1	1	1138.96	3414.85	-4.85	-0.00552	51751	HCD (High Energy Collision Dissociation)	MS2	22.618	80	91.6631	38313	A001.raw	0/0	3.98
	FALSE	High	Sequest HT (A2)	[K].SIDNGIFVQLVQANSPASLVGLR.[F]		1	1	O08992	O08992	0	3	0.8136	0	1	1	800.109	2398.31	1.5	0.0012	146570	HCD (High Energy Collision Dissociation)	MS2	35.5869	80	68.0704	27964	A001.raw	0/0	3.81					615292	68.11
	FALSE	High	Sequest HT (A2)	[K].DSSGHVGFIFK.[S]		1	1	O08992	O08992	0	2	0.6812	0	1	1	597.301	1193.6	0.47	0.00028	11965309	HCD (High Energy Collision Dissociation)	MS2	0	8.074	39.7631	14092	A001.raw	0/0	3.67					2.90174e+07	39.75
	FALSE	High	Sequest HT (A2)	[K].DSSGHVGFIFK.[S]		1	1	O08992	O08992	0	2	0.6202	0	1	1	597.301	1193.59	-0.86	-0.00051	3.35445e+06	HCD (High Energy Collision Dissociation)	MS2	6.32895	21.895	39.0794	13752	A001.raw	0/0	3.37
	FALSE	High	Sequest HT (A2)	[K].VIQAQTAYSANPASQAFVLVDASAALPPDGNLYPK.[L]		1	1	O08992	O08992	0	3	0.7182	0	1	1	1196.62	3587.85	2.06	0.00246	87935.9	HCD (High Energy Collision Dissociation)	MS2	5.97729	80	66.7177	27318	A001.raw	0/0	3.3					1.71366e+06	66.71
	FALSE	High	Sequest HT (A2)	[K].DSSGHVGFIFK.[S]		1	1	O08992	O08992	0	2	0.6433	0	1	1	597.301	1193.59	-0.86	-0.00051	10265662	HCD (High Energy Collision Dissociation)	MS2	0	7.207	39.4232	13923	A001.raw	0/0	3.14					1.1927e+07	39.4
	FALSE	High	Sequest HT (A2)	[K].DSSGHVGFIFK.[S]		1	1	O08992	O08992	0	2	0.5526	0	1	1	597.299	1193.59	-2.81	-0.00167	1.17634e+06	HCD (High Energy Collision Dissociation)	MS2	45.7528	80	41.5853	14984	A001.raw	0/0	3.04					8.57135e+06	41.61
	FALSE	High	Sequest HT (A2)	[K].SIDNGIFVQLVQANSPASLVGLR.[F]		1	1	O08992	O08992	0	3	0.8074	0	1	1	800.107	2398.31	-0.95	-0.00076	47870.7	HCD (High Energy Collision Dissociation)	MS2	20.4724	80	70.183	28976	A001.raw	0/0	2.96					822216	70.17
	FALSE	High	Sequest HT (A2)	[K].DSSGHVGFIFK.[S]		1	1	O08992	O08992	0	2	0.6907	0	1	1	597.301	1193.59	-0.45	-0.00027	9803070	HCD (High Energy Collision Dissociation)	MS2	0.567353	7.613	40.1096	14261	A001.raw	0/0	2.91
	FALSE	High	Sequest HT (A2)	[K].DSSGHVGFIFK.[S]		1	1	O08992	O08992	0	2	0.6021	0	1	1	597.3	1193.59	-1.17	-0.0007	725670	HCD (High Energy Collision Dissociation)	MS2	5.08749	80	42.0216	15196	A001.raw	0/0	2.89
	FALSE	High	Sequest HT (A2)	[K].ITSIVKDSSAAR.[N]		1	1	O08992	O08992	1	3	0.6725	0	1	1	416.57	1247.7	-0.3	-0.00013	374480	HCD (High Energy Collision Dissociation)	MS2	28.9878	80	22.4163	5812	A001.raw	0/0	2.87					998432	22.39
	FALSE	High	Sequest HT (A2)	[K].ITSIVKDSSAAR.[N]		1	1	O08992	O08992	1	3	0.656	0	1	1	416.57	1247.69	-0.45	-0.00019	450710	HCD (High Energy Collision Dissociation)	MS2	21.4527	80	22.0658	5653	A001.raw	0/0	2.82					697188	22.07
	FALSE	High	Sequest HT (A2)	[K].DSSGHVGFIFK.[S]		1	1	O08992	O08992	0	2	0.658	0	1	1	597.3	1193.59	-1.78	-0.00106	3.75382e+06	HCD (High Energy Collision Dissociation)	MS2	1.99468	16.412	40.455	14431	A001.raw	0/0	2.69					6.34416e+06	40.43
	FALSE	High	Sequest HT (A2)	[K].DSSGHVGFIFK.[S]		1	1	O08992	O08992	0	2	0.6007	0	1	1	597.3	1193.59	-1.88	-0.00112	693015	HCD (High Energy Collision Dissociation)	MS2	39.2388	80	38.7284	13578	A001.raw	0/0	2.68					3.10746e+06	38.73
	FALSE	High	Sequest HT (A2)	[K].DSSGHVGFIFK.[S]		1	1	O08992	O08992	0	2	0.6292	0	1	1	597.303	1193.6	2.41	0.00144	2.06218e+06	HCD (High Energy Collision Dissociation)	MS2	15.1342	20.543	40.7973	14599	A001.raw	0/0	2.4					7.27375e+06	40.77
	FALSE	High	Sequest HT (A2)	[K].DSSGHVGFIFK.[S]		1	1	O08992	O08992	0	2	0.6624	0	1	1	597.299	1193.59	-2.91	-0.00174	924639	HCD (High Energy Collision Dissociation)	MS2	8.46096	80	43.1786	15766	A001.raw	0/0	2.37					5.27759e+06	43.21
	FALSE	High	Mascot (A6)	[K].SIDNGIFVQLVQANSPASLVGLR.[F]		1	5	O08992	A2AKJ9; A2AKJ6; H3BLG5; O08992; Q3TMX0	0	2	1	0	1	1	1199.66	2398.3	-2.04	-0.00244	1.00795e+06	HCD (High Energy Collision Dissociation)	MS2	3.31989	80	68.8233	28324	A001.raw	15/252		143	32	17	2.95742e-14	1.16842e+07	68.78
	FALSE	High	Mascot (A6)	[K].SIDNGIFVQLVQANSPASLVGLR.[F]		1	5	O08992	A2AKJ9; A2AKJ6; H3BLG5; O08992; Q3TMX0	0	3	1	0	1	1	800.108	2398.31	0.35	0.00028	997857	HCD (High Energy Collision Dissociation)	MS2	0.617397	80	69.1295	28471	A001.raw	13/252		122	31	16	3.38882e-12	3.33132e+06	69.14
	FALSE	High	Mascot (A6)	[K].SIDNGIFVQLVQANSPASLVGLR.[F]		1	5	O08992	A2AKJ9; A2AKJ6; H3BLG5; O08992; Q3TMX0	0	3	1	0	1	1	800.108	2398.31	0.66	0.00053	1.88444e+06	HCD (High Energy Collision Dissociation)	MS2	0.975263	80	68.4304	28136	A001.raw	12/252		109	31	16	7.47915e-11
	FALSE	High	Mascot (A6)	[K].SIDNGIFVQLVQANSPASLVGLR.[F]		1	5	O08992	A2AKJ9; A2AKJ6; H3BLG5; O08992; Q3TMX0	0	2	1	0	1	1	1199.66	2398.31	0	0	701361	HCD (High Energy Collision Dissociation)	MS2	0	80	68.4782	28159	A001.raw	13/252		108	31	16	1.03076e-10	5.47454e+06	68.54
	FALSE	High	Mascot (A6)	[K].SIDNGIFVQLVQANSPASLVGLR.[F]		1	5	O08992	A2AKJ9; A2AKJ6; H3BLG5; O08992; Q3TMX0	0	2	1	0	1	1	1199.66	2398.32	4.79	0.00574	68332	HCD (High Energy Collision Dissociation)	MS2	13.5338	80	68.1165	27986	A001.raw	12/252		99	31	16	7.65011e-10	906312	68.11
	FALSE	High	Mascot (A6)	[K].VIQAQTAYSANPASQAFVLVDASAALPPDGNLYPK.[L]		1	6	O08992	A2AKJ9; A2AKJ6; A2AKJ5; H3BLG5; O08992; Q3TMX0	0	3	1	0	1	1	1196.62	3587.85	2.16	0.00259	460521	HCD (High Energy Collision Dissociation)	MS2	0	80	64.5465	26273	A001.raw	22/400		94	35	20	5.81729e-09	1.75284e+07	64.58
	FALSE	High	Mascot (A6)	[K].SIDNGIFVQLVQANSPASLVGLR.[F]		1	5	O08992	A2AKJ9; A2AKJ6; H3BLG5; O08992; Q3TMX0	0	3	1	0	1	1	800.108	2398.31	0.5	0.0004	2.99907e+06	HCD (High Energy Collision Dissociation)	MS2	1.71144	80	68.7753	28301	A001.raw	11/252		88	31	16	1.01194e-08	1.76222e+07	68.63
	FALSE	High	Mascot (A6)	[K].VIQAQTAYSANPASQAFVLVDASAALPPDGNLYPK.[L]		1	6	O08992	A2AKJ9; A2AKJ6; A2AKJ5; H3BLG5; O08992; Q3TMX0	0	3	1	0	1	1	1196.62	3587.85	1.96	0.00234	585239	HCD (High Energy Collision Dissociation)	MS2	0	80	63.8239	25924	A001.raw	23/400		86	35	20	3.96157e-08	7.61998e+06	63.78
	FALSE	High	Mascot (A6)	[R].LKSIDNGIFVQLVQANSPASLVGLR.[F]		1	5	O08992	A2AKJ9; A2AKJ6; H3BLG5; O08992; Q3TMX0	1	3	1	0	1	1	880.5	2639.49	-0.45	-0.00039	3234818	HCD (High Energy Collision Dissociation)	MS2	6.66131	80	65.5633	26763	A001.raw	21/284		79	29	13	4.12382e-08	2.07328e+07	65.48
	FALSE	High	Mascot (A6)	[K].DAQIADILSTAGTVVTITIMPTFIFEHIIKR.[M]		1	2	O08992	O08992; Q3TMX0	1	5	1	0	1	1	683.779	3414.87	-1.37	-0.00093	222754	HCD (High Energy Collision Dissociation)	MS2	2.83355	80	92.0445	38466	A001.raw	12/352		74	29	13	1.35613e-07	1.15954e+07	92.05
	FALSE	High	Mascot (A6)	[K].DAQIADILSTAGTVVTITIMPTFIFEHIIKR.[M]		1	2	O08992	O08992; Q3TMX0	1	3	1	0	1	1	1138.96	3414.87	0.84	0.00095	306319	HCD (High Energy Collision Dissociation)	MS2	0	80	92.3462	38589	A001.raw	31/352		73	28	13	1.16557e-07	6984114	92.17
	FALSE	High	Mascot (A6)	[K].VIQAQTAYSANPASQAFVLVDASAALPPDGNLYPK.[L]		1	6	O08992	A2AKJ9; A2AKJ6; A2AKJ5; H3BLG5; O08992; Q3TMX0	0	3	1	0	1	1	1196.61	3587.83	-3.25	-0.00388	954857	HCD (High Energy Collision Dissociation)	MS2	0	80	64.1884	26100	A001.raw	23/400		71	35	20	1.01703e-06	2.08947e+07	64.26
	FALSE	High	Mascot (A6)	[K].DAQIADILSTAGTVVTITIMPTFIFEHIIK.[R]		1	2	O08992	O08992; Q3TMX0	0	4	1	0	1	1	815.449	3258.77	1.2	0.00098	279212	HCD (High Energy Collision Dissociation)	MS2	0	80	96.6055	40433	A001.raw	19/340		68	32	16	9.64561e-07	4.79162e+06	96.67
	FALSE	High	Mascot (A6)	[R].LKSIDNGIFVQLVQANSPASLVGLR.[F]		1	5	O08992	A2AKJ9; A2AKJ6; H3BLG5; O08992; Q3TMX0	1	3	1	0	1	1	880.5	2639.48	-1.28	-0.00113	1.65464e+06	HCD (High Energy Collision Dissociation)	MS2	9.01026	80	65.9239	26937	A001.raw	10/284		63	29	13	1.50093e-06	2.25196e+06	65.87
	FALSE	High	Mascot (A6)	[K].SIDNGIFVQLVQANSPASLVGLR.[F]		1	5	O08992	A2AKJ9; A2AKJ6; H3BLG5; O08992; Q3TMX0	0	3	1	0	1	1	800.107	2398.31	-0.95	-0.00076	47870.7	HCD (High Energy Collision Dissociation)	MS2	20.4724	80	70.183	28976	A001.raw	12/252		62	32	17	4.07168e-06	822216	70.17
	FALSE	High	Mascot (A6)	[K].DSSGHVGFIFK.[S]		1	3	O08992	H3BLG5; O08992; Q3TMX0	0	2	0.8871	0	1	1	597.301	1193.6	0.47	0.00028	11965309	HCD (High Energy Collision Dissociation)	MS2	0	8.074	39.7631	14092	A001.raw	13/80		62	36	20	9.888e-06	2.90174e+07	39.75
	FALSE	High	Mascot (A6)	[K].ITSIVKDSSAAR.[N]		1	3	O08992	H3BLG5; O08992; Q3TMX0	1	2	1	0	1	1	624.351	1247.69	-0.42	-0.00026	352662	HCD (High Energy Collision Dissociation)	MS2	15.3645	80	22.3139	5765	A001.raw	7/112		62	34	19	7.5362e-06	1.05039e+06	22.33
	FALSE	High	Mascot (A6)	[K].DSSGHVGFIFK.[S]		1	3	O08992	H3BLG5; O08992; Q3TMX0	0	2	0.8871	0	1	1	597.301	1193.59	-0.86	-0.00051	3.35445e+06	HCD (High Energy Collision Dissociation)	MS2	6.32895	21.895	39.0794	13752	A001.raw	13/80		62	35	20	1.00818e-05
	FALSE	High	Mascot (A6)	[R].EVILcKDQDGK.[I]	C5(Carbamidomethyl)	1	5	O08992	A2AKJ9; A2AKJ6; H3BLG5; O08992; Q3TMX0	1	2	0.918	0	1	1	652.829	1304.65	-1.08	-0.0007	142138	HCD (High Energy Collision Dissociation)	MS2	10.5887	80	20.0381	4757	A001.raw	8/100		61	35	20	1.06201e-05
	FALSE	High	Mascot (A6)	[K].DAQIADILSTAGTVVTITIMPTFIFEHIIK.[R]		1	2	O08992	O08992; Q3TMX0	0	3	1	0	1	1	1086.93	3258.76	-2.14	-0.00233	472869	HCD (High Energy Collision Dissociation)	MS2	1.59192	80	96.5235	40397	A001.raw	20/340		61	30	15	3.95146e-06	998338	96.46
	FALSE	High	Mascot (A6)	[K].DAQIADILSTAGTVVTITIMPTFIFEHIIKR.[M]		1	2	O08992	O08992; Q3TMX0	1	3	1	0	1	1	1138.96	3414.85	-4.85	-0.00552	51751	HCD (High Energy Collision Dissociation)	MS2	22.618	80	91.6631	38313	A001.raw	12/352		60	29	14	4.14029e-06
	FALSE	High	Mascot (A6)	[K].DAQIADILSTAGTVVTITIMPTFIFEHIIK.[R]		1	2	O08992	O08992; Q3TMX0	0	4	1	0	1	1	815.448	3258.77	0.01	0	394832	HCD (High Energy Collision Dissociation)	MS2	1.81851	80	96.9433	40581	A001.raw	20/340		59	31	16	8.04483e-06	9.96094e+06	96.84
	FALSE	High	Mascot (A6)	[K].DSSGHVGFIFK.[S]		1	3	O08992	H3BLG5; O08992; Q3TMX0	0	2	0.8644	0	1	1	597.301	1193.59	-0.86	-0.00051	10265662	HCD (High Energy Collision Dissociation)	MS2	0	7.207	39.4232	13923	A001.raw	12/80		59	35	20	2.10638e-05	1.1927e+07	39.4
	FALSE	High	Mascot (A6)	[K].DAQIADILSTAGTVVTITIMPTFIFEHIIK.[R]		1	2	O08992	O08992; Q3TMX0	0	3	1	0	1	1	1086.92	3258.76	-4.06	-0.0044	216126	HCD (High Energy Collision Dissociation)	MS2	0	80	97.2105	40696	A001.raw	18/340		56	32	16	1.50273e-05	3.30728e+06	97.06
	FALSE	High	Mascot (A6)	[K].DSSGHVGFIFK.[S]		1	3	O08992	H3BLG5; O08992; Q3TMX0	0	2	0.8545	0	1	1	597.301	1193.59	-0.45	-0.00027	9803070	HCD (High Energy Collision Dissociation)	MS2	0.567353	7.613	40.1096	14261	A001.raw	13/80		55	35	20	5.17829e-05
	FALSE	High	Mascot (A6)	[K].SIDNGIFVQLVQANSPASLVGLR.[F]		1	5	O08992	A2AKJ9; A2AKJ6; H3BLG5; O08992; Q3TMX0	0	3	1	0	1	1	800.109	2398.31	1.5	0.0012	146570	HCD (High Energy Collision Dissociation)	MS2	35.5869	80	68.0704	27964	A001.raw	18/252		54	31	16	2.03177e-05	615292	68.11
	FALSE	High	Mascot (A6)	[K].DAQIADILSTAGTVVTITIMPTFIFEHIIKR.[M]		1	2	O08992	O08992; Q3TMX0	1	3	1	0	1	1	1138.96	3414.86	-1.95	-0.00222	296622	HCD (High Energy Collision Dissociation)	MS2	6.29141	80	92.6905	38740	A001.raw	13/352		53	29	14	1.50274e-05	1.48933e+06	92.69
	FALSE	High	Mascot (A6)	[K].DAQIADILSTAGTVVTITIMPTFIFEHIIK.[R]		1	2	O08992	O08992; Q3TMX0	0	3	1	0	1	1	1086.93	3258.77	0.22	0.00023	721638	HCD (High Energy Collision Dissociation)	MS2	0	80	96.8708	40549	A001.raw	19/340		53	32	16	2.96398e-05	1.78375e+06	96.88
	FALSE	High	Mascot (A6)	[K].VIQAQTAYSANPASQAFVLVDASAALPPDGNLYPK.[L]		1	6	O08992	A2AKJ9; A2AKJ6; A2AKJ5; H3BLG5; O08992; Q3TMX0	0	3	1	0	1	1	1196.62	3587.85	2.67	0.0032	294407	HCD (High Energy Collision Dissociation)	MS2	0	80	65.6069	26784	A001.raw	19/400		53	35	20	6.75651e-05	2.71107e+06	65.65
	FALSE	High	Mascot (A6)	[K].DAQIADILSTAGTVVTITIMPTFIFEHIIKR.[M]		1	2	O08992	O08992; Q3TMX0	1	3	1	0	1	1	1138.96	3414.86	-2.49	-0.00283	511388	HCD (High Energy Collision Dissociation)	MS2	0	80	92.0092	38452	A001.raw	23/352		51	29	14	3.01441e-05	3.63442e+07	91.88
	FALSE	High	Mascot (A6)	[K].DAQIADILSTAGTVVTITIMPTFIFEHIIKR.[M]		1	2	O08992	O08992; Q3TMX0	1	4	1	0	1	1	854.473	3414.87	0.35	0.0003	792926	HCD (High Energy Collision Dissociation)	MS2	0.546354	80	92.4141	38620	A001.raw	12/352		51	28	13	2.23544e-05	504558	92.39
	FALSE	High	Mascot (A6)	[R].FGDQVLQINGENcAGWSSDKAHK.[V]	C13(Carbamidomethyl)	1	5	O08992	A2AKJ9; A2AKJ6; H3BLG5; O08992; Q3TMX0	1	4	1	0	1	1	641.051	2561.18	-0.01	-1e-05	693049	HCD (High Energy Collision Dissociation)	MS2	5.76709	80	40.8179	14609	A001.raw	23/252		49	39	23	0.000363461	3.718e+06	40.84
	FALSE	High	Mascot (A6)	[K].DAQIADILSTAGTVVTITIMPTFIFEHIIKR.[M]		1	2	O08992	O08992; Q3TMX0	1	4	1	0	1	1	854.472	3414.87	-1.29	-0.0011	163664	HCD (High Energy Collision Dissociation)	MS2	3.086	80	92.7543	38769	A001.raw	30/352		48	29	13	4.87865e-05	1.33684e+06	92.72
	FALSE	High	Mascot (A6)	[R].NGLLTDHHIcEINGQNVIGLK.[D]	C10(Carbamidomethyl)	1	2	O08992	O08992; Q3TMX0	0	3	1	0	1	1	782.405	2345.2	-0.91	-0.00071	730882	HCD (High Energy Collision Dissociation)	MS2	8.56609	80	45.1899	16745	A001.raw	16/240		48	35	20	0.000244769	5.60263e+07	45.31
	FALSE	High	Mascot (A6)	[K].DAQIADILSTAGTVVTITIMPTFIFEHIIKR.[M]		1	2	O08992	O08992; Q3TMX0	1	5	1	0	1	1	683.78	3414.87	-0.47	-0.00032	292159	HCD (High Energy Collision Dissociation)	MS2	2.36759	80	92.3847	38607	A001.raw	10/352		47	28	13	5.46258e-05	3.64534e+06	92.37
	FALSE	High	Mascot (A6)	[R].FGDQVLQINGENcAGWSSDKAHK.[V]	C13(Carbamidomethyl)	1	5	O08992	A2AKJ9; A2AKJ6; H3BLG5; O08992; Q3TMX0	1	4	1	0	1	1	641.05	2561.18	-1.63	-0.00104	934594	HCD (High Energy Collision Dissociation)	MS2	0	80	40.458	14433	A001.raw	14/252		45	39	24	0.000942215
	FALSE	High	Mascot (A6)	[K].DAQIADILSTAGTVVTITIMPTFIFEHIIKR.[M]		1	2	O08992	O08992; Q3TMX0	1	4	1	0	1	1	854.474	3414.87	1.07	0.00091	1.81298e+06	HCD (High Energy Collision Dissociation)	MS2	1.59684	80	92.0639	38475	A001.raw	32/352		44	27	13	8.53233e-05	6.7991e+07	92.07
	FALSE	High	Mascot (A6)	[R].NGLLTDHHIcEINGQNVIGLK.[D]	C10(Carbamidomethyl)	1	2	O08992	O08992; Q3TMX0	0	3	1	0	1	1	782.405	2345.2	-1.38	-0.00108	1.52689e+06	HCD (High Energy Collision Dissociation)	MS2	1.72667	80	45.5346	16917	A001.raw	16/240		43	35	20	0.000673382	6.80307e+06	45.57
	FALSE	High	Mascot (A6)	[K].DSSGHVGFIFK.[S]		1	3	O08992	H3BLG5; O08992; Q3TMX0	0	2	1	0	1	1	597.3	1193.59	-1.78	-0.00106	3.75382e+06	HCD (High Energy Collision Dissociation)	MS2	1.99468	16.412	40.455	14431	A001.raw	13/80		43	36	21	0.000980926	6.34416e+06	40.43
	FALSE	High	Mascot (A6)	[K].ITSIVKDSSAAR.[N]		1	3	O08992	H3BLG5; O08992; Q3TMX0	1	2	1	0	1	1	624.351	1247.69	-0.61	-0.00038	298114	HCD (High Energy Collision Dissociation)	MS2	12.4976	80	21.9556	5605	A001.raw	10/112		43	34	19	0.000619833	308678	21.93
	FALSE	High	Mascot (A6)	[R].LKSIDNGIFVQLVQANSPASLVGLR.[F]		1	5	O08992	A2AKJ9; A2AKJ6; H3BLG5; O08992; Q3TMX0	1	3	1	0	1	1	880.501	2639.49	-0.31	-0.00027	2.26467e+06	HCD (High Energy Collision Dissociation)	MS2	41.4137	42.694	65.208	26593	A001.raw	12/284		41	29	13	0.000258404	2.43828e+07	65.13
	FALSE	High	Mascot (A6)	[K].QGIREVILcKDQDGK.[I]	C9(Carbamidomethyl)	1	5	O08992	A2AKJ9; A2AKJ6; H3BLG5; O08992; Q3TMX0	2	3	1	0	1	1	586.977	1758.92	0.68	0.0004	896711	HCD (High Energy Collision Dissociation)	MS2	10.7746	76.455	29.4022	9110	A001.raw	8/168		40	35	20	0.00136102	3.46943e+06	29.36
	FALSE	High	Mascot (A6)	[R].MAPSIMK.[S]		1	2	O08992	O08992; Q3TMX0	0	2	0.8718	0	1	1	389.203	777.4	-0.28	-0.00011	1.63856e+06	HCD (High Energy Collision Dissociation)	MS2	20.4463	48.076	24.9362	7000	A001.raw	6/48		39	30	15	0.00055464
	FALSE	High	Mascot (A6)	[R].NGLLTDHHIcEINGQNVIGLK.[D]	C10(Carbamidomethyl)	1	2	O08992	O08992; Q3TMX0	0	4	1	0	1	1	587.056	2345.2	-0.63	-0.00037	1.50055e+06	HCD (High Energy Collision Dissociation)	MS2	3.15657	41.012	45.8096	17056	A001.raw	11/240		38	35	20	0.0020671	1.43948e+07	45.9
	FALSE	High	Mascot (A6)	[K].DSSGHVGFIFK.[S]		1	3	O08992	H3BLG5; O08992; Q3TMX0	0	2	1	0	1	1	597.3	1193.59	-1.88	-0.00112	693015	HCD (High Energy Collision Dissociation)	MS2	39.2388	80	38.7284	13578	A001.raw	14/80		38	36	21	0.00314511	3.10746e+06	38.73
	FALSE	High	Mascot (A6)	[K].DAQIADILSTAGTVVTITIMPTFIFEHIIK.[R]		1	2	O08992	O08992; Q3TMX0	0	3	1	0	1	1	1086.93	3258.77	1.11	0.00121	13898.9	HCD (High Energy Collision Dissociation)	MS2	0	80	99.8434	41775	A001.raw	10/340		38	32	16	0.00105651
	FALSE	High	Mascot (A6)	[R].MAPSIMK.[S]		1	2	O08992	O08992; Q3TMX0	0	2	0.7297	0	1	1	389.204	777.4	0.03	1e-05	7157268	HCD (High Energy Collision Dissociation)	MS2	4.12143	8.334	25.2814	7159	A001.raw	5/48		37	31	16	0.00110517	2.60811e+07	25.26
	FALSE	High	Mascot (A6)	[K].VIQAQTAYSANPASQAFVLVDASAALPPDGNLYPK.[L]		1	6	O08992	A2AKJ9; A2AKJ6; A2AKJ5; H3BLG5; O08992; Q3TMX0	0	3	1	0	1	1	1196.62	3587.85	2.06	0.00246	87935.9	HCD (High Energy Collision Dissociation)	MS2	5.97729	80	66.7177	27318	A001.raw	15/400		37	35	20	0.00295317	1.71366e+06	66.71
	FALSE	High	Mascot (A6)	[K].DSSGHVGFIFK.[S]		1	3	O08992	H3BLG5; O08992; Q3TMX0	0	2	1	0	1	1	597.299	1193.59	-2.81	-0.00167	1.17634e+06	HCD (High Energy Collision Dissociation)	MS2	45.7528	80	41.5853	14984	A001.raw	10/80		36	36	21	0.0040599	8.57135e+06	41.61
	FALSE	High	Mascot (A6)	[K].SGKITSIVKDSSAAR.[N]		1	3	O08992	H3BLG5; O08992; Q3TMX0	2	3	0.7353	0	1	1	507.287	1519.85	1.08	0.00055	260432	HCD (High Energy Collision Dissociation)	MS2	28.3453	80	24.7554	6913	A001.raw	10/160		34	33	18	0.00367895
	FALSE	High	Mascot (A6)	[R].MAPSIMK.[S]		1	2	O08992	O08992; Q3TMX0	0	2	0.8125	0	1	1	389.203	777.399	-0.75	-0.00029	3.22085e+06	HCD (High Energy Collision Dissociation)	MS2	31.8763	15.61	25.619	7315	A001.raw	5/48		32	30	15	0.00316965	1.02971e+07	25.58
FALSE	Master Protein	Q6GSS7	Histone H2A type 2-A OS=Mus musculus OX=10090 GN=Hist2h2aa1 PE=1 SV=3	57.6923	5	25	0	1	130	14.1	10.9	High		High	0	44.77	4	High	0	602	5
	Checked	Confidence	Identifying Node	Annotated Sequence	Modifications	# Protein Groups	# Proteins	Master Protein Accessions	Protein Accessions	# Missed Cleavages	Charge	DeltaScore	DeltaCn	Rank	Search Engine Rank	m/z [Da]	MH+ [Da]	DeltaM [ppm]	Deltam/z [Da]	Intensity	Activation Type	MS Order	Isolation Interference [%]	Ion Inject Time [ms]	RT [min]	First Scan	Spectrum File	Ions Matched	XCorr	Ions Score	Identity Strict	Identity Relaxed	Expectation Value	Area	Apex RT [min]
	FALSE	High	Sequest HT (A2)	[R].VGAGAPVYMAAVLEYLTAEILELAGNAAR.[D]		2	3	Q64522; Q6GSS7	Q64523; Q64522; Q6GSS7	0	3	0.8661	0	1	1	978.52	2933.55	0.85	0.00083	419389	HCD (High Energy Collision Dissociation)	MS2	9.78202	80	103.015	43134	A001.raw	0/0	7.32
	FALSE	High	Sequest HT (A2)	[KR].VTIAQGGVLPNIQAVLLPK.[K]		2	8	C0HKE4; Q6GSS7	Q64523; Q8BFU2; C0HKE4; Q8CGP5; Q8R1M2; Q8CGP7; Q8CGP6; Q6GSS7	0	3	0.8545	0	1	1	644.395	1931.17	1.07	0.00069	3.14534e+06	HCD (High Energy Collision Dissociation)	MS2	0	74.539	63.4336	25735	A001.raw	0/0	5.91					2.78716e+07	63.43
	FALSE	High	Sequest HT (A2)	[KR].VTIAQGGVLPNIQAVLLPK.[K]		2	8	C0HKE4; Q6GSS7	Q64523; Q8BFU2; C0HKE4; Q8CGP5; Q8R1M2; Q8CGP7; Q8CGP6; Q6GSS7	0	2	0.8441	0	1	1	966.088	1931.17	0.22	0.00021	4.13492e+06	HCD (High Energy Collision Dissociation)	MS2	5.35305	80	63.3203	25680	A001.raw	0/0	5.13					4.02109e+07	63.33
	FALSE	High	Sequest HT (A2)	[KR].VTIAQGGVLPNIQAVLLPK.[K]		2	8	C0HKE4; Q6GSS7	Q64523; Q8BFU2; C0HKE4; Q8CGP5; Q8R1M2; Q8CGP7; Q8CGP6; Q6GSS7	0	2	0.8205	0	1	1	966.087	1931.17	-1.04	-0.00101	3.21557e+06	HCD (High Energy Collision Dissociation)	MS2	5.227	75.103	63.6618	25845	A001.raw	0/0	5.07					4.97706e+07	63.57
	FALSE	High	Sequest HT (A2)	[KR].VTIAQGGVLPNIQAVLLPK.[K]		2	8	C0HKE4; Q6GSS7	Q64523; Q8BFU2; C0HKE4; Q8CGP5; Q8R1M2; Q8CGP7; Q8CGP6; Q6GSS7	0	3	0.8182	0	1	1	644.394	1931.17	-0.26	-0.00017	1.24688e+06	HCD (High Energy Collision Dissociation)	MS2	12.3022	80	63.7751	25900	A001.raw	0/0	4.95					3.36476e+07	63.72
	FALSE	High	Sequest HT (A2)	[KR].VTIAQGGVLPNIQAVLLPK.[K]		2	8	C0HKE4; Q6GSS7	Q64523; Q8BFU2; C0HKE4; Q8CGP5; Q8R1M2; Q8CGP7; Q8CGP6; Q6GSS7	0	3	0.833	0	1	1	644.394	1931.17	0.03	2e-05	380458	HCD (High Energy Collision Dissociation)	MS2	18.2379	80	63.0741	25562	A001.raw	0/0	4.49					2.96807e+06	63.08
	FALSE	High	Sequest HT (A2)	[KR].VTIAQGGVLPNIQAVLLPK.[K]		2	8	C0HKE4; Q6GSS7	Q64523; Q8BFU2; C0HKE4; Q8CGP5; Q8R1M2; Q8CGP7; Q8CGP6; Q6GSS7	0	2	0.8078	0	1	1	966.087	1931.17	-0.66	-0.00064	849735	HCD (High Energy Collision Dissociation)	MS2	48.069	80	64.0026	26010	A001.raw	0/0	4.37					2.53209e+06	64.01
	FALSE	High	Sequest HT (A2)	[KR].VTIAQGGVLPNIQAVLLPK.[K]		2	8	C0HKE4; Q6GSS7	Q64523; Q8BFU2; C0HKE4; Q8CGP5; Q8R1M2; Q8CGP7; Q8CGP6; Q6GSS7	0	2	0.8557	0	1	1	966.087	1931.17	-0.79	-0.00076	188253	HCD (High Energy Collision Dissociation)	MS2	0	80	62.9695	25512	A001.raw	0/0	2.98
	FALSE	High	Sequest HT (A2)	[R].NDEELNKLLGK.[V]		1	2	Q6GSS7	Q64523; Q6GSS7	1	2	0.7437	0	1	1	636.842	1272.68	-2.24	-0.00142	240434	HCD (High Energy Collision Dissociation)	MS2	10.8332	80	38.7928	13610	A001.raw	0/0	2.38					1.02706e+06	38.8
	FALSE	High	Sequest HT (A2)	[R].AGLQFPVGR.[VI]		3	12	Q64522; C0HKE4; Q6GSS7	Q64523; Q8BFU2; Q3THW5; Q64522; C0HKE4; P0C0S6; Q8CGP5; Q8R1M2; P27661; Q8CGP7; Q8CGP6; Q6GSS7	0	2	0.5945	0	1	1	472.77	944.532	1.3	0.00062	12228752	HCD (High Energy Collision Dissociation)	MS2	8.27079	8	39.2533	13840	A001.raw	0/0	2.17					5.44757e+07	39.19
	FALSE	High	Mascot (A6)	[R].VGAGAPVYMAAVLEYLTAEILELAGNAAR.[D]		2	4	Q64522; Q6GSS7	Q64523; Q64522; F8WIX8; Q6GSS7	0	3	1	0	1	1	978.52	2933.55	0.85	0.00083	419389	HCD (High Energy Collision Dissociation)	MS2	9.78202	80	103.015	43134	A001.raw	14/236		85	32	17	2.1391e-08
	FALSE	High	Mascot (A6)	[KR].VTIAQGGVLPNIQAVLLPK.[K]		2	10	C0HKE4; Q6GSS7	Q64523; Q8BFU2; C0HKE4; Q8CGP5; Q8CGP4; Q8R1M2; Q8CGP7; F8WIX8; Q8CGP6; Q6GSS7	0	3	1	0	1	1	644.394	1931.17	0.03	2e-05	380458	HCD (High Energy Collision Dissociation)	MS2	18.2379	80	63.0741	25562	A001.raw	9/200		81	23	13	7.03751e-09	2.96807e+06	63.08
	FALSE	High	Mascot (A6)	[KR].VTIAQGGVLPNIQAVLLPK.[K]		2	10	C0HKE4; Q6GSS7	Q64523; Q8BFU2; C0HKE4; Q8CGP5; Q8CGP4; Q8R1M2; Q8CGP7; F8WIX8; Q8CGP6; Q6GSS7	0	3	1	0	1	1	644.395	1931.17	1.07	0.00069	3.14534e+06	HCD (High Energy Collision Dissociation)	MS2	0	74.539	63.4336	25735	A001.raw	9/200		76	23	13	2.49025e-08	2.78716e+07	63.43
	FALSE	High	Mascot (A6)	[R].NDEELNKLLGK.[V]		1	3	Q6GSS7	Q64523; F8WIX8; Q6GSS7	1	2	1	0	1	1	636.842	1272.68	-2.24	-0.00142	240434	HCD (High Energy Collision Dissociation)	MS2	10.8332	80	38.7928	13610	A001.raw	8/120		65	35	20	4.74098e-06	1.02706e+06	38.8
	FALSE	High	Mascot (A6)	[KR].VTIAQGGVLPNIQAVLLPK.[K]		2	10	C0HKE4; Q6GSS7	Q64523; Q8BFU2; C0HKE4; Q8CGP5; Q8CGP4; Q8R1M2; Q8CGP7; F8WIX8; Q8CGP6; Q6GSS7	0	2	1	0	1	1	966.088	1931.17	0.22	0.00021	4.13492e+06	HCD (High Energy Collision Dissociation)	MS2	5.35305	80	63.3203	25680	A001.raw	15/200		60	23	13	9.48948e-07	4.02109e+07	63.33
	FALSE	High	Mascot (A6)	[KR].VTIAQGGVLPNIQAVLLPK.[K]		2	10	C0HKE4; Q6GSS7	Q64523; Q8BFU2; C0HKE4; Q8CGP5; Q8CGP4; Q8R1M2; Q8CGP7; F8WIX8; Q8CGP6; Q6GSS7	0	2	1	0	1	1	966.087	1931.17	-1.04	-0.00101	3.21557e+06	HCD (High Energy Collision Dissociation)	MS2	5.227	75.103	63.6618	25845	A001.raw	14/200		55	23	13	2.63174e-06	4.97706e+07	63.57
	FALSE	High	Mascot (A6)	[KR].VTIAQGGVLPNIQAVLLPK.[K]		2	10	C0HKE4; Q6GSS7	Q64523; Q8BFU2; C0HKE4; Q8CGP5; Q8CGP4; Q8R1M2; Q8CGP7; F8WIX8; Q8CGP6; Q6GSS7	0	3	1	0	1	1	644.394	1931.17	-0.26	-0.00017	1.24688e+06	HCD (High Energy Collision Dissociation)	MS2	12.3022	80	63.7751	25900	A001.raw	9/200		54	23	13	3.78808e-06	3.36476e+07	63.72
	FALSE	High	Mascot (A6)	[R].AGLQFPVGR.[VI]		3	16	Q64522; C0HKE4; Q6GSS7	Q64523; Q8BFU2; Q3THW5; Q64522; C0HKE4; P0C0S6; Q8CGP5; Q8CGP4; Q8R1M2; P27661; Q3UA95; Q8CGP7; F8WIX8; G3UWL7; Q8CGP6; Q6GSS7	0	2	0.7447	0	1	1	472.769	944.531	-0.12	-6e-05	18790996	HCD (High Energy Collision Dissociation)	MS2	1.49531	5.434	38.8962	13661	A001.raw	7/84		47	36	21	0.000311393	2.97595e+07	38.85
	FALSE	High	Mascot (A6)	[R].HLQLAIR.[NG]		2	14	C0HKE4; Q6GSS7	Q64523; Q8BFU2; Q3THW5; C0HKE4; P0C0S6; Q8CGP5; Q8CGP4; Q8R1M2; Q8R029; P27661; Q8CGP7; F8WIX8; Q8CGP6; Q6GSS7	0	2	0.4	0	1	1	425.767	850.526	0.5	0.00021	3.80438e+06	HCD (High Energy Collision Dissociation)	MS2	4.16533	19.293	30.0039	9392	A001.raw	6/64		45	26	13	6.29755e-05
	FALSE	High	Mascot (A6)	[R].HLQLAIR.[NG]		2	14	C0HKE4; Q6GSS7	Q64523; Q8BFU2; Q3THW5; C0HKE4; P0C0S6; Q8CGP5; Q8CGP4; Q8R1M2; Q8R029; P27661; Q8CGP7; F8WIX8; Q8CGP6; Q6GSS7	0	2	0.4186	0	1	1	425.767	850.526	0.07	3e-05	1006245	HCD (High Energy Collision Dissociation)	MS2	6.16257	80	30.3796	9566	A001.raw	6/64		43	27	13	9.62584e-05	2.83504e+06	30.43
	FALSE	High	Mascot (A6)	[KR].VTIAQGGVLPNIQAVLLPK.[K]		2	10	C0HKE4; Q6GSS7	Q64523; Q8BFU2; C0HKE4; Q8CGP5; Q8CGP4; Q8R1M2; Q8CGP7; F8WIX8; Q8CGP6; Q6GSS7	0	2	1	0	1	1	966.087	1931.17	-0.66	-0.00064	849735	HCD (High Energy Collision Dissociation)	MS2	48.069	80	64.0026	26010	A001.raw	15/200		40	23	13	8.51959e-05	2.53209e+06	64.01
	FALSE	High	Mascot (A6)	[R].AGLQFPVGR.[VI]		3	16	Q64522; C0HKE4; Q6GSS7	Q64523; Q8BFU2; Q3THW5; Q64522; C0HKE4; P0C0S6; Q8CGP5; Q8CGP4; Q8R1M2; P27661; Q3UA95; Q8CGP7; F8WIX8; G3UWL7; Q8CGP6; Q6GSS7	0	2	0.8919	0	1	1	472.77	944.532	1.3	0.00062	12228752	HCD (High Energy Collision Dissociation)	MS2	8.27079	8	39.2533	13840	A001.raw	6/84		37	32	17	0.00130996	5.44757e+07	39.19
	FALSE	High	Mascot (A6)	[R].HLQLAIR.[NG]		2	14	C0HKE4; Q6GSS7	Q64523; Q8BFU2; Q3THW5; C0HKE4; P0C0S6; Q8CGP5; Q8CGP4; Q8R1M2; Q8R029; P27661; Q8CGP7; F8WIX8; Q8CGP6; Q6GSS7	0	2	0.4444	0	1	1	425.766	850.525	-0.72	-0.00031	3.98262e+06	HCD (High Energy Collision Dissociation)	MS2	43.0064	19.941	29.6638	9239	A001.raw	6/64		36	27	13	0.000493672	9.62801e+06	29.7
	FALSE	High	Mascot (A6)	[R].NDEELNKLLGK.[V]		1	3	Q6GSS7	Q64523; F8WIX8; Q6GSS7	1	2	1	0	1	1	636.842	1272.68	-1.37	-0.00087	484345	HCD (High Energy Collision Dissociation)	MS2	22.416	80	38.4454	13439	A001.raw	7/120		35	34	19	0.00364273	5.97182e+06	38.46
	FALSE	High	Mascot (A6)	[KR].VTIAQGGVLPNIQAVLLPK.[K]		2	10	C0HKE4; Q6GSS7	Q64523; Q8BFU2; C0HKE4; Q8CGP5; Q8CGP4; Q8R1M2; Q8CGP7; F8WIX8; Q8CGP6; Q6GSS7	0	2	1	0	1	1	966.087	1931.17	-0.79	-0.00076	188253	HCD (High Energy Collision Dissociation)	MS2	0	80	62.9695	25512	A001.raw	12/200		34	23	13	0.000309328
FALSE	Master Protein	C0HKE4	Histone H2A type 1-E OS=Mus musculus OX=10090 GN=Hist1h2ae PE=1 SV=1	57.6923	5	25	0	1	130	14.1	11.05	High		High	0	41.98	4	High	0	565	5
	Checked	Confidence	Identifying Node	Annotated Sequence	Modifications	# Protein Groups	# Proteins	Master Protein Accessions	Protein Accessions	# Missed Cleavages	Charge	DeltaScore	DeltaCn	Rank	Search Engine Rank	m/z [Da]	MH+ [Da]	DeltaM [ppm]	Deltam/z [Da]	Intensity	Activation Type	MS Order	Isolation Interference [%]	Ion Inject Time [ms]	RT [min]	First Scan	Spectrum File	Ions Matched	XCorr	Ions Score	Identity Strict	Identity Relaxed	Expectation Value	Area	Apex RT [min]
	FALSE	High	Sequest HT (A2)	[KR].VTIAQGGVLPNIQAVLLPK.[K]		2	8	C0HKE4; Q6GSS7	Q64523; Q8BFU2; C0HKE4; Q8CGP5; Q8R1M2; Q8CGP7; Q8CGP6; Q6GSS7	0	3	0.8545	0	1	1	644.395	1931.17	1.07	0.00069	3.14534e+06	HCD (High Energy Collision Dissociation)	MS2	0	74.539	63.4336	25735	A001.raw	0/0	5.91					2.78716e+07	63.43
	FALSE	High	Sequest HT (A2)	[KR].VTIAQGGVLPNIQAVLLPK.[K]		2	8	C0HKE4; Q6GSS7	Q64523; Q8BFU2; C0HKE4; Q8CGP5; Q8R1M2; Q8CGP7; Q8CGP6; Q6GSS7	0	2	0.8441	0	1	1	966.088	1931.17	0.22	0.00021	4.13492e+06	HCD (High Energy Collision Dissociation)	MS2	5.35305	80	63.3203	25680	A001.raw	0/0	5.13					4.02109e+07	63.33
	FALSE	High	Sequest HT (A2)	[KR].VTIAQGGVLPNIQAVLLPK.[K]		2	8	C0HKE4; Q6GSS7	Q64523; Q8BFU2; C0HKE4; Q8CGP5; Q8R1M2; Q8CGP7; Q8CGP6; Q6GSS7	0	2	0.8205	0	1	1	966.087	1931.17	-1.04	-0.00101	3.21557e+06	HCD (High Energy Collision Dissociation)	MS2	5.227	75.103	63.6618	25845	A001.raw	0/0	5.07					4.97706e+07	63.57
	FALSE	High	Sequest HT (A2)	[KR].VTIAQGGVLPNIQAVLLPK.[K]		2	8	C0HKE4; Q6GSS7	Q64523; Q8BFU2; C0HKE4; Q8CGP5; Q8R1M2; Q8CGP7; Q8CGP6; Q6GSS7	0	3	0.8182	0	1	1	644.394	1931.17	-0.26	-0.00017	1.24688e+06	HCD (High Energy Collision Dissociation)	MS2	12.3022	80	63.7751	25900	A001.raw	0/0	4.95					3.36476e+07	63.72
	FALSE	High	Sequest HT (A2)	[R].VGAGAPVYLAAVLEYLTAEILELAGNAAR.[D]		1	7	C0HKE4	Q8BFU2; C0HKE4; Q8CGP5; Q8R1M2; P27661; Q8CGP7; Q8CGP6	0	4	0.6897	0	1	1	729.653	2915.59	0.45	0.00033	219253	HCD (High Energy Collision Dissociation)	MS2	9.26521	80	103.647	43383	A001.raw	0/0	4.64					6.91222e+07	103.7
	FALSE	High	Sequest HT (A2)	[KR].VTIAQGGVLPNIQAVLLPK.[K]		2	8	C0HKE4; Q6GSS7	Q64523; Q8BFU2; C0HKE4; Q8CGP5; Q8R1M2; Q8CGP7; Q8CGP6; Q6GSS7	0	3	0.833	0	1	1	644.394	1931.17	0.03	2e-05	380458	HCD (High Energy Collision Dissociation)	MS2	18.2379	80	63.0741	25562	A001.raw	0/0	4.49					2.96807e+06	63.08
	FALSE	High	Sequest HT (A2)	[KR].VTIAQGGVLPNIQAVLLPK.[K]		2	8	C0HKE4; Q6GSS7	Q64523; Q8BFU2; C0HKE4; Q8CGP5; Q8R1M2; Q8CGP7; Q8CGP6; Q6GSS7	0	2	0.8078	0	1	1	966.087	1931.17	-0.66	-0.00064	849735	HCD (High Energy Collision Dissociation)	MS2	48.069	80	64.0026	26010	A001.raw	0/0	4.37					2.53209e+06	64.01
	FALSE	High	Sequest HT (A2)	[KR].VTIAQGGVLPNIQAVLLPK.[K]		2	8	C0HKE4; Q6GSS7	Q64523; Q8BFU2; C0HKE4; Q8CGP5; Q8R1M2; Q8CGP7; Q8CGP6; Q6GSS7	0	2	0.8557	0	1	1	966.087	1931.17	-0.79	-0.00076	188253	HCD (High Energy Collision Dissociation)	MS2	0	80	62.9695	25512	A001.raw	0/0	2.98
	FALSE	High	Sequest HT (A2)	[R].NDEELNKLLGR.[V]		1	6	C0HKE4	Q8BFU2; C0HKE4; Q8CGP5; Q8R1M2; Q8CGP7; Q8CGP6	1	2	0.4934	0	1	1	650.847	1300.69	0.31	0.0002	524813	HCD (High Energy Collision Dissociation)	MS2	50.4446	80	40.6505	14528	A001.raw	0/0	2.27
	FALSE	High	Sequest HT (A2)	[R].AGLQFPVGR.[VI]		3	12	Q64522; C0HKE4; Q6GSS7	Q64523; Q8BFU2; Q3THW5; Q64522; C0HKE4; P0C0S6; Q8CGP5; Q8R1M2; P27661; Q8CGP7; Q8CGP6; Q6GSS7	0	2	0.5945	0	1	1	472.77	944.532	1.3	0.00062	12228752	HCD (High Energy Collision Dissociation)	MS2	8.27079	8	39.2533	13840	A001.raw	0/0	2.17					5.44757e+07	39.19
	FALSE	High	Mascot (A6)	[KR].VTIAQGGVLPNIQAVLLPK.[K]		2	10	C0HKE4; Q6GSS7	Q64523; Q8BFU2; C0HKE4; Q8CGP5; Q8CGP4; Q8R1M2; Q8CGP7; F8WIX8; Q8CGP6; Q6GSS7	0	3	1	0	1	1	644.394	1931.17	0.03	2e-05	380458	HCD (High Energy Collision Dissociation)	MS2	18.2379	80	63.0741	25562	A001.raw	9/200		81	23	13	7.03751e-09	2.96807e+06	63.08
	FALSE	High	Mascot (A6)	[KR].VTIAQGGVLPNIQAVLLPK.[K]		2	10	C0HKE4; Q6GSS7	Q64523; Q8BFU2; C0HKE4; Q8CGP5; Q8CGP4; Q8R1M2; Q8CGP7; F8WIX8; Q8CGP6; Q6GSS7	0	3	1	0	1	1	644.395	1931.17	1.07	0.00069	3.14534e+06	HCD (High Energy Collision Dissociation)	MS2	0	74.539	63.4336	25735	A001.raw	9/200		76	23	13	2.49025e-08	2.78716e+07	63.43
	FALSE	High	Mascot (A6)	[R].VGAGAPVYLAAVLEYLTAEILELAGNAAR.[D]		1	7	C0HKE4	Q8BFU2; C0HKE4; Q8CGP5; Q8R1M2; P27661; Q8CGP7; Q8CGP6	0	4	0.8529	0	1	1	729.653	2915.59	0.45	0.00033	219253	HCD (High Energy Collision Dissociation)	MS2	9.26521	80	103.647	43383	A001.raw	19/236		68	29	14	5.5851e-07	6.91222e+07	103.7
	FALSE	High	Mascot (A6)	[KR].VTIAQGGVLPNIQAVLLPK.[K]		2	10	C0HKE4; Q6GSS7	Q64523; Q8BFU2; C0HKE4; Q8CGP5; Q8CGP4; Q8R1M2; Q8CGP7; F8WIX8; Q8CGP6; Q6GSS7	0	2	1	0	1	1	966.088	1931.17	0.22	0.00021	4.13492e+06	HCD (High Energy Collision Dissociation)	MS2	5.35305	80	63.3203	25680	A001.raw	15/200		60	23	13	9.48948e-07	4.02109e+07	63.33
	FALSE	High	Mascot (A6)	[KR].VTIAQGGVLPNIQAVLLPK.[K]		2	10	C0HKE4; Q6GSS7	Q64523; Q8BFU2; C0HKE4; Q8CGP5; Q8CGP4; Q8R1M2; Q8CGP7; F8WIX8; Q8CGP6; Q6GSS7	0	2	1	0	1	1	966.087	1931.17	-1.04	-0.00101	3.21557e+06	HCD (High Energy Collision Dissociation)	MS2	5.227	75.103	63.6618	25845	A001.raw	14/200		55	23	13	2.63174e-06	4.97706e+07	63.57
	FALSE	High	Mascot (A6)	[KR].VTIAQGGVLPNIQAVLLPK.[K]		2	10	C0HKE4; Q6GSS7	Q64523; Q8BFU2; C0HKE4; Q8CGP5; Q8CGP4; Q8R1M2; Q8CGP7; F8WIX8; Q8CGP6; Q6GSS7	0	3	1	0	1	1	644.394	1931.17	-0.26	-0.00017	1.24688e+06	HCD (High Energy Collision Dissociation)	MS2	12.3022	80	63.7751	25900	A001.raw	9/200		54	23	13	3.78808e-06	3.36476e+07	63.72
	FALSE	High	Mascot (A6)	[R].AGLQFPVGR.[VI]		3	16	Q64522; C0HKE4; Q6GSS7	Q64523; Q8BFU2; Q3THW5; Q64522; C0HKE4; P0C0S6; Q8CGP5; Q8CGP4; Q8R1M2; P27661; Q3UA95; Q8CGP7; F8WIX8; G3UWL7; Q8CGP6; Q6GSS7	0	2	0.7447	0	1	1	472.769	944.531	-0.12	-6e-05	18790996	HCD (High Energy Collision Dissociation)	MS2	1.49531	5.434	38.8962	13661	A001.raw	7/84		47	36	21	0.000311393	2.97595e+07	38.85
	FALSE	High	Mascot (A6)	[R].HLQLAIR.[NG]		2	14	C0HKE4; Q6GSS7	Q64523; Q8BFU2; Q3THW5; C0HKE4; P0C0S6; Q8CGP5; Q8CGP4; Q8R1M2; Q8R029; P27661; Q8CGP7; F8WIX8; Q8CGP6; Q6GSS7	0	2	0.4	0	1	1	425.767	850.526	0.5	0.00021	3.80438e+06	HCD (High Energy Collision Dissociation)	MS2	4.16533	19.293	30.0039	9392	A001.raw	6/64		45	26	13	6.29755e-05
	FALSE	High	Mascot (A6)	[R].NDEELNKLLGR.[V]		1	7	C0HKE4	Q8BFU2; C0HKE4; Q8CGP5; Q8CGP4; Q8R1M2; Q8CGP7; Q8CGP6	1	2	1	0	1	1	650.847	1300.69	0.31	0.0002	524813	HCD (High Energy Collision Dissociation)	MS2	50.4446	80	40.6505	14528	A001.raw	9/120		44	34	19	0.000433924
	FALSE	High	Mascot (A6)	[R].HLQLAIR.[NG]		2	14	C0HKE4; Q6GSS7	Q64523; Q8BFU2; Q3THW5; C0HKE4; P0C0S6; Q8CGP5; Q8CGP4; Q8R1M2; Q8R029; P27661; Q8CGP7; F8WIX8; Q8CGP6; Q6GSS7	0	2	0.4186	0	1	1	425.767	850.526	0.07	3e-05	1006245	HCD (High Energy Collision Dissociation)	MS2	6.16257	80	30.3796	9566	A001.raw	6/64		43	27	13	9.62584e-05	2.83504e+06	30.43
	FALSE	High	Mascot (A6)	[KR].VTIAQGGVLPNIQAVLLPK.[K]		2	10	C0HKE4; Q6GSS7	Q64523; Q8BFU2; C0HKE4; Q8CGP5; Q8CGP4; Q8R1M2; Q8CGP7; F8WIX8; Q8CGP6; Q6GSS7	0	2	1	0	1	1	966.087	1931.17	-0.66	-0.00064	849735	HCD (High Energy Collision Dissociation)	MS2	48.069	80	64.0026	26010	A001.raw	15/200		40	23	13	8.51959e-05	2.53209e+06	64.01
	FALSE	High	Mascot (A6)	[R].AGLQFPVGR.[VI]		3	16	Q64522; C0HKE4; Q6GSS7	Q64523; Q8BFU2; Q3THW5; Q64522; C0HKE4; P0C0S6; Q8CGP5; Q8CGP4; Q8R1M2; P27661; Q3UA95; Q8CGP7; F8WIX8; G3UWL7; Q8CGP6; Q6GSS7	0	2	0.8919	0	1	1	472.77	944.532	1.3	0.00062	12228752	HCD (High Energy Collision Dissociation)	MS2	8.27079	8	39.2533	13840	A001.raw	6/84		37	32	17	0.00130996	5.44757e+07	39.19
	FALSE	High	Mascot (A6)	[R].HLQLAIR.[NG]		2	14	C0HKE4; Q6GSS7	Q64523; Q8BFU2; Q3THW5; C0HKE4; P0C0S6; Q8CGP5; Q8CGP4; Q8R1M2; Q8R029; P27661; Q8CGP7; F8WIX8; Q8CGP6; Q6GSS7	0	2	0.4444	0	1	1	425.766	850.525	-0.72	-0.00031	3.98262e+06	HCD (High Energy Collision Dissociation)	MS2	43.0064	19.941	29.6638	9239	A001.raw	6/64		36	27	13	0.000493672	9.62801e+06	29.7
	FALSE	High	Mascot (A6)	[R].NDEELNKLLGR.[V]		1	7	C0HKE4	Q8BFU2; C0HKE4; Q8CGP5; Q8CGP4; Q8R1M2; Q8CGP7; Q8CGP6	1	3	1	0	1	1	434.234	1300.69	1.19	0.00052	1356450	HCD (High Energy Collision Dissociation)	MS2	30.4386	52.566	40.1238	14268	A001.raw	7/120		36	34	19	0.00277791	4.05255e+06	40.12
	FALSE	High	Mascot (A6)	[KR].VTIAQGGVLPNIQAVLLPK.[K]		2	10	C0HKE4; Q6GSS7	Q64523; Q8BFU2; C0HKE4; Q8CGP5; Q8CGP4; Q8R1M2; Q8CGP7; F8WIX8; Q8CGP6; Q6GSS7	0	2	1	0	1	1	966.087	1931.17	-0.79	-0.00076	188253	HCD (High Energy Collision Dissociation)	MS2	0	80	62.9695	25512	A001.raw	12/200		34	23	13	0.000309328
FALSE	Master Protein	P60710	Actin, cytoplasmic 1 OS=Mus musculus GN=Actb PE=1 SV=1	53.8667	12	54	0	1	375	41.7	5.48	High		High	0	106.29	11	High	0	1194	10
	Checked	Confidence	Identifying Node	Annotated Sequence	Modifications	# Protein Groups	# Proteins	Master Protein Accessions	Protein Accessions	# Missed Cleavages	Charge	DeltaScore	DeltaCn	Rank	Search Engine Rank	m/z [Da]	MH+ [Da]	DeltaM [ppm]	Deltam/z [Da]	Intensity	Activation Type	MS Order	Isolation Interference [%]	Ion Inject Time [ms]	RT [min]	First Scan	Spectrum File	Ions Matched	XCorr	Ions Score	Identity Strict	Identity Relaxed	Expectation Value	Area	Apex RT [min]
	FALSE	High	Sequest HT (A2)	[R].VAPEEHPVLLTEAPLNPK.[A]		1	2	P60710	P60710; P63260	0	2	0.2487	0	1	1	977.534	1954.06	-2.32	-0.00227	1.7664e+06	HCD (High Energy Collision Dissociation)	MS2	0	80	42.3406	15352	A001.raw	0/0	5.79					1.30826e+07	42.36
	FALSE	High	Sequest HT (A2)	[R].TTGIVMDSGDGVTHTVPIYEGYALPHAILR.[L]		1	3	P60710	Q8BFZ3; P60710; P63260	0	4	0.8342	0	1	1	796.657	3183.61	-2.2	-0.00175	1.02267e+06	HCD (High Energy Collision Dissociation)	MS2	5.42967	80	55.6625	21923	A001.raw	0/0	5.67					2.25111e+07	55.68
	FALSE	High	Sequest HT (A2)	[R].TTGIVMDSGDGVTHTVPIYEGYALPHAILR.[L]		1	3	P60710	Q8BFZ3; P60710; P63260	0	3	0.7671	0	1	1	1061.87	3183.6	-3.17	-0.00336	395999	HCD (High Energy Collision Dissociation)	MS2	0	80	55.3584	21771	A001.raw	0/0	5.54					1.05168e+07	55.38
	FALSE	High	Sequest HT (A2)	[K].DLYANTVLSGGTTMYPGIADR.[M]		1	2	P60710	P60710; P63260	0	2	0.7907	0	1	1	1108.03	2215.06	-3.35	-0.00371	328387	HCD (High Energy Collision Dissociation)	MS2	0	80	53.6406	20917	A001.raw	0/0	5.16					3.05835e+06	53.65
	FALSE	High	Sequest HT (A2)	[K].DLYANTVLSGGTTMYPGIADR.[M]		1	2	P60710	P60710; P63260	0	2	0.7965	0	1	1	1108.04	2215.07	0.18	0.0002	204228	HCD (High Energy Collision Dissociation)	MS2	0	80	53.276	20736	A001.raw	0/0	5.11					3.06678e+06	53.14
	FALSE	High	Sequest HT (A2)	[K].LcYVALDFEQEMATAASSSSLEK.[S]	C2(Carbamidomethyl)	1	2	P60710	P60710; P63260	0	3	0.7917	0	1	1	850.732	2550.18	2.84	0.00241	222330	HCD (High Energy Collision Dissociation)	MS2	0	80	62.7316	25397	A001.raw	0/0	4.8					2.74632e+06	62.72
	FALSE	High	Sequest HT (A2)	[R].TTGIVMDSGDGVTHTVPIYEGYALPHAILR.[L]		1	3	P60710	Q8BFZ3; P60710; P63260	0	4	0.7106	0	1	1	796.658	3183.61	-1.12	-0.00089	404520	HCD (High Energy Collision Dissociation)	MS2	9.9251	80	55.316	21750	A001.raw	0/0	4.7
	FALSE	High	Sequest HT (A2)	[R].VAPEEHPVLLTEAPLNPK.[A]		1	2	P60710	P60710; P63260	0	2	0.2449	0	1	1	977.535	1954.06	-0.7	-0.00068	465321	HCD (High Energy Collision Dissociation)	MS2	0	80	42.7007	15531	A001.raw	0/0	4.37					3.67961e+06	42.6
	FALSE	High	Sequest HT (A2)	[K].LcYVALDFEQEMATAASSSSLEK.[S]	C2(Carbamidomethyl)	1	2	P60710	P60710; P63260	0	3	0.7861	0	1	1	850.73	2550.17	0.18	0.00015	241831	HCD (High Energy Collision Dissociation)	MS2	21.8013	80	63.1006	25575	A001.raw	0/0	4.16					2.41814e+06	63.2
	FALSE	High	Sequest HT (A2)	[K].DLYANTVLSGGTTMYPGIADR.[M]		1	2	P60710	P60710; P63260	0	2	0.7524	0	1	1	1108.04	2215.06	-3.13	-0.00346	254602	HCD (High Energy Collision Dissociation)	MS2	18.4766	80	54.0646	21128	A001.raw	0/0	4.12					3.86565e+06	54.04
	FALSE	High	Sequest HT (A2)	[R].VAPEEHPVLLTEAPLNPK.[A]		1	2	P60710	P60710; P63260	0	2	0.243	0	1	1	977.534	1954.06	-1.76	-0.00172	332058	HCD (High Energy Collision Dissociation)	MS2	0	80	41.9842	15178	A001.raw	0/0	3.95					1.305e+06	42.06
	FALSE	High	Sequest HT (A2)	[R].cPEALFQPSFLGMEScGIHETTFNSIMK.[C]	C1(Carbamidomethyl); C16(Carbamidomethyl)	1	2	P60710	P60710; P63260	0	3	0.7792	0	1	1	1077.83	3231.46	0.56	0.00061	338511	HCD (High Energy Collision Dissociation)	MS2	6.75486	80	63.585	25809	A001.raw	0/0	3.94
	FALSE	High	Sequest HT (A2)	[RK].SYELPDGQVITIGNER.[F]		2	7	P60710; P68033	Q8BFZ3; P63268; P60710; P62737; P68134; P68033; P63260	0	2	0.8074	0	1	1	895.949	1790.89	-0.76	-0.00068	3.50541e+06	HCD (High Energy Collision Dissociation)	MS2	4.36534	69.095	49.7959	19025	A001.raw	0/0	3.79					8.36444e+06	49.83
	FALSE	High	Sequest HT (A2)	[R].VAPEEHPVLLTEAPLNPK.[A]		1	2	P60710	P60710; P63260	0	3	0.1619	0	1	1	652.026	1954.06	-1.05	-0.00068	1.75143e+06	HCD (High Energy Collision Dissociation)	MS2	36.998	29.118	42.85	15607	A001.raw	0/0	3.52					5.70819e+06	42.75
	FALSE	High	Sequest HT (A2)	[RK].SYELPDGQVITIGNER.[F]		2	7	P60710; P68033	Q8BFZ3; P63268; P60710; P62737; P68134; P68033; P63260	0	2	0.755	0	1	1	895.949	1790.89	-1.17	-0.00105	4.02288e+06	HCD (High Energy Collision Dissociation)	MS2	0	54.39	49.4384	18849	A001.raw	0/0	3.51					2.07376e+07	49.5
	FALSE	High	Sequest HT (A2)	[K].IWHHTFYNELR.[V]		2	4	P60710; P68033	P60710; P68134; P68033; P63260	0	3	0.6188	0	1	1	505.921	1515.75	0.12	6e-05	1.80695e+06	HCD (High Energy Collision Dissociation)	MS2	20.4953	60.008	36.863	12670	A001.raw	0/0	3.2					4.59595e+06	36.85
	FALSE	High	Sequest HT (A2)	[R].HQGVMVGMGQK.[D]		2	7	P60710; P68033	Q8BFZ3; P63268; P60710; P62737; P68134; P68033; P63260	0	2	0.7719	0	1	1	586.289	1171.57	-0.7	-0.00041	757328	HCD (High Energy Collision Dissociation)	MS2	17.2883	80	22.9867	6074	A001.raw	0/0	3.2					1.66908e+06	23
	FALSE	High	Sequest HT (A2)	[K].IWHHTFYNELR.[V]		2	4	P60710; P68033	P60710; P68134; P68033; P63260	0	3	0.6052	0	1	1	505.921	1515.75	-0.01	0	1.58115e+06	HCD (High Energy Collision Dissociation)	MS2	23.7033	56.884	36.5148	12500	A001.raw	0/0	3.09
	FALSE	High	Sequest HT (A2)	[K].IWHHTFYNELR.[V]		2	4	P60710; P68033	P60710; P68134; P68033; P63260	0	3	0.585	0	1	1	505.921	1515.75	-0.13	-6e-05	1811629	HCD (High Energy Collision Dissociation)	MS2	21.2809	70.079	36.1721	12334	A001.raw	0/0	3.06					5.41454e+06	36.17
	FALSE	High	Sequest HT (A2)	[RK].SYELPDGQVITIGNER.[F]		2	7	P60710; P68033	Q8BFZ3; P63268; P60710; P62737; P68134; P68033; P63260	0	2	0.7822	0	1	1	895.947	1790.89	-2.94	-0.00264	1.35469e+06	HCD (High Energy Collision Dissociation)	MS2	11.5096	80	49.085	18676	A001.raw	0/0	3.03					7.29621e+06	49.22
	FALSE	High	Sequest HT (A2)	[K].IWHHTFYNELR.[V]		2	4	P60710; P68033	P60710; P68134; P68033; P63260	0	3	0.5581	0	1	1	505.921	1515.75	0.12	6e-05	1.06349e+06	HCD (High Energy Collision Dissociation)	MS2	20.7864	80	37.2139	12839	A001.raw	0/0	3.01					4.46875e+06	37.14
	FALSE	High	Sequest HT (A2)	[K].QEYDESGPSIVHRK.[C]		1	2	P60710	P60710; P63260	1	3	0.8014	0	1	1	548.937	1644.8	-0.47	-0.00026	260211	HCD (High Energy Collision Dissociation)	MS2	20.7008	80	23.2544	6198	A001.raw	0/0	2.82					1.17097e+06	23.23
	FALSE	High	Sequest HT (A2)	[R].AVFPSIVGRPR.[H]		2	6	P60710; P68033	P63268; P60710; P62737; P68134; P68033; P63260	0	3	0.6489	0	1	1	400.24	1198.71	-0.15	-6e-05	8997892	HCD (High Energy Collision Dissociation)	MS2	25.7988	6.982	37.6465	13054	A001.raw	0/0	2.82					8.84915e+06	37.6
	FALSE	High	Sequest HT (A2)	[R].AVFPSIVGRPR.[H]		2	6	P60710; P68033	P63268; P60710; P62737; P68134; P68033; P63260	0	3	0.7351	0	1	1	400.241	1198.71	2.53	0.00101	1.57653e+06	HCD (High Energy Collision Dissociation)	MS2	38.1403	30.546	38.6991	13563	A001.raw	0/0	2.68					2.27438e+06	38.67
	FALSE	High	Sequest HT (A2)	[R].HQGVMVGMGQK.[D]		2	7	P60710; P68033	Q8BFZ3; P63268; P60710; P62737; P68134; P68033; P63260	0	2	0.8015	0	1	1	586.289	1171.57	0.55	0.00032	621120	HCD (High Energy Collision Dissociation)	MS2	10.5631	80	22.6384	5913	A001.raw	0/0	2.67
	FALSE	High	Sequest HT (A2)	[K].IWHHTFYNELR.[V]		2	4	P60710; P68033	P60710; P68134; P68033; P63260	0	2	0.6239	0	1	1	758.378	1515.75	-0.54	-0.00041	468667	HCD (High Energy Collision Dissociation)	MS2	49.8218	80	36.9035	12690	A001.raw	0/0	2.26					4.80838e+06	36.85
	FALSE	High	Sequest HT (A2)	[K].EITALAPSTMK.[I]		2	6	P60710; P68033	P63268; P60710; P62737; P68134; P68033; P63260	0	2	0.6318	0	1	1	581.313	1161.62	-0.15	-9e-05	5.35176e+06	HCD (High Energy Collision Dissociation)	MS2	18.8406	11.487	34.3349	11448	A001.raw	0/0	2.2					3.71351e+07	34.31
	FALSE	High	Sequest HT (A2)	[K].EITALAPSTMK.[I]		2	6	P60710; P68033	P63268; P60710; P62737; P68134; P68033; P63260	0	2	0.6068	0	1	1	581.313	1161.62	0.17	0.0001	1.74955e+06	HCD (High Energy Collision Dissociation)	MS2	51.0064	21.885	33.9871	11280	A001.raw	0/0	2.06
	FALSE	High	Sequest HT (A2)	[K].EITALAPSTMK.[I]		2	6	P60710; P68033	P63268; P60710; P62737; P68134; P68033; P63260	0	2	0.4878	0	1	1	581.312	1161.62	-1.94	-0.00112	1.25382e+06	HCD (High Energy Collision Dissociation)	MS2	29.912	31.287	34.6726	11616	A001.raw	0/0	2.05					5.16399e+06	34.68
	FALSE	High	Mascot (A6)	[K].DLYANTVLSGGTTMYPGIADR.[M]		1	5	P60710	E9Q1F2; P60710; F8WGM8; B1ATY1; P63260	0	2	1	0	1	1	1108.04	2215.07	0.18	0.0002	204228	HCD (High Energy Collision Dissociation)	MS2	0	80	53.276	20736	A001.raw	15/224		117	38	22	4.56259e-11	3.06678e+06	53.14
	FALSE	High	Mascot (A6)	[K].DLYANTVLSGGTTMYPGIADR.[M]		1	5	P60710	E9Q1F2; P60710; F8WGM8; B1ATY1; P63260	0	2	1	0	1	1	1108.03	2215.06	-3.35	-0.00371	328387	HCD (High Energy Collision Dissociation)	MS2	0	80	53.6406	20917	A001.raw	14/224		101	38	23	2.09881e-09	3.05835e+06	53.65
	FALSE	High	Mascot (A6)	[R].VAPEEHPVLLTEAPLNPK.[A]		1	6	P60710	P60710; G3UZ07; G3UYG0; E9Q5F4; P63260; E9Q606	0	2	0.5055	0	1	1	977.534	1954.06	-2.32	-0.00227	1.7664e+06	HCD (High Energy Collision Dissociation)	MS2	0	80	42.3406	15352	A001.raw	15/144		91	33	18	6.79115e-09	1.30826e+07	42.36
	FALSE	High	Mascot (A6)	[RK].SYELPDGQVITIGNER.[F]		2	10	P60710; P68033	Q8BFZ3; P63268; E9Q1F2; P60710; D3YZY0; P62737; P68134; E9Q5F4; P68033; P63260	0	2	1	0	1	1	895.949	1790.89	-0.76	-0.00068	3.50541e+06	HCD (High Energy Collision Dissociation)	MS2	4.36534	69.095	49.7959	19025	A001.raw	9/152		87	37	21	3.79345e-08	8.36444e+06	49.83
	FALSE	High	Mascot (A6)	[K].LcYVALDFEQEMATAASSSSLEK.[S]	C2(Carbamidomethyl)	1	4	P60710	E9Q1F2; P60710; E9Q5F4; P63260	0	3	1	0	1	1	850.732	2550.18	2.84	0.00241	222330	HCD (High Energy Collision Dissociation)	MS2	0	80	62.7316	25397	A001.raw	17/228		87	38	23	6.15082e-08	2.74632e+06	62.72
	FALSE	High	Mascot (A6)	[RK].SYELPDGQVITIGNER.[F]		2	10	P60710; P68033	Q8BFZ3; P63268; E9Q1F2; P60710; D3YZY0; P62737; P68134; E9Q5F4; P68033; P63260	0	2	1	0	1	1	895.949	1790.89	-1.17	-0.00105	4.02288e+06	HCD (High Energy Collision Dissociation)	MS2	0	54.39	49.4384	18849	A001.raw	9/152		82	37	21	1.18659e-07	2.07376e+07	49.5
	FALSE	High	Mascot (A6)	[R].VAPEEHPVLLTEAPLNPK.[A]		1	6	P60710	P60710; G3UZ07; G3UYG0; E9Q5F4; P63260; E9Q606	0	2	0.5385	0	1	1	977.535	1954.06	-0.7	-0.00068	465321	HCD (High Energy Collision Dissociation)	MS2	0	80	42.7007	15531	A001.raw	12/144		78	32	17	9.48029e-08	3.67961e+06	42.6
	FALSE	High	Mascot (A6)	[K].DLYANTVLSGGTTMYPGIADR.[M]		1	5	P60710	E9Q1F2; P60710; F8WGM8; B1ATY1; P63260	0	2	1	0	1	1	1108.04	2215.06	-3.13	-0.00346	254602	HCD (High Energy Collision Dissociation)	MS2	18.4766	80	54.0646	21128	A001.raw	13/224		66	38	23	6.34659e-06	3.86565e+06	54.04
	FALSE	High	Mascot (A6)	[RK].SYELPDGQVITIGNER.[F]		2	10	P60710; P68033	Q8BFZ3; P63268; E9Q1F2; P60710; D3YZY0; P62737; P68134; E9Q5F4; P68033; P63260	0	2	1	0	1	1	895.947	1790.89	-2.94	-0.00264	1.35469e+06	HCD (High Energy Collision Dissociation)	MS2	11.5096	80	49.085	18676	A001.raw	8/152		66	36	21	4.75897e-06	7.29621e+06	49.22
	FALSE	High	Mascot (A6)	[R].VAPEEHPVLLTEAPLNPK.[A]		1	6	P60710	P60710; G3UZ07; G3UYG0; E9Q5F4; P63260; E9Q606	0	2	0.5938	0	1	1	977.534	1954.06	-1.76	-0.00172	332058	HCD (High Energy Collision Dissociation)	MS2	0	80	41.9842	15178	A001.raw	12/144		64	32	17	2.98646e-06	1.305e+06	42.06
	FALSE	High	Mascot (A6)	[R].cPEALFQPSFLGMEScGIHETTFNSIMK.[C]	C1(Carbamidomethyl); C16(Carbamidomethyl)	1	4	P60710	E9Q1F2; P60710; F8WGM8; P63260	0	3	1	0	1	1	1077.83	3231.46	0.56	0.00061	338511	HCD (High Energy Collision Dissociation)	MS2	6.75486	80	63.585	25809	A001.raw	21/300		63	39	24	1.84286e-05
	FALSE	High	Mascot (A6)	[R].HQGVMVGMGQK.[D]		2	14	P60710; P68033	D3Z2K3; Q8BFZ3; P63268; E9Q2D1; P60710; D3YZY0; G3UZ07; P62737; G3UYG0; P68134; E9Q5F4; P68033; P63260; E9Q606	0	2	1	0	1	1	586.289	1171.57	0.55	0.00032	621120	HCD (High Energy Collision Dissociation)	MS2	10.5631	80	22.6384	5913	A001.raw	8/116		62	35	20	8.09599e-06
	FALSE	High	Mascot (A6)	[R].HQGVMVGMGQK.[D]		2	14	P60710; P68033	D3Z2K3; Q8BFZ3; P63268; E9Q2D1; P60710; D3YZY0; G3UZ07; P62737; G3UYG0; P68134; E9Q5F4; P68033; P63260; E9Q606	0	2	1	0	1	1	586.289	1171.57	-0.7	-0.00041	757328	HCD (High Energy Collision Dissociation)	MS2	17.2883	80	22.9867	6074	A001.raw	9/116		60	35	20	1.1613e-05	1.66908e+06	23
	FALSE	High	Mascot (A6)	[K].LcYVALDFEQEMATAASSSSLEK.[S]	C2(Carbamidomethyl)	1	4	P60710	E9Q1F2; P60710; E9Q5F4; P63260	0	3	1	0	1	1	850.73	2550.17	0.18	0.00015	241831	HCD (High Energy Collision Dissociation)	MS2	21.8013	80	63.1006	25575	A001.raw	17/228		59	38	23	3.46112e-05	2.41814e+06	63.2
	FALSE	High	Mascot (A6)	[R].AVFPSIVGRPR.[H]		2	16	P60710; P68033	D3Z2K3; P63268; E9Q2D1; E9Q1F2; F6WX90; P60710; D3YZY0; G3UZ07; P62737; G3UYG0; P68134; E9Q5F4; B1ATY1; P68033; P63260; E9Q606	0	2	1	0	1	1	599.856	1198.71	-0.01	-1e-05	9001322	HCD (High Energy Collision Dissociation)	MS2	4.21544	10.178	37.8398	13145	A001.raw	8/88		58	32	17	1.20489e-05	2.73639e+07	37.82
	FALSE	High	Mascot (A6)	[R].TTGIVMDSGDGVTHTVPIYEGYALPHAILR.[L]		1	6	P60710	Q8BFZ3; E9Q1F2; P60710; G3UZ07; E9Q5F4; P63260	0	3	1	0	1	1	1061.87	3183.6	-3.17	-0.00336	395999	HCD (High Energy Collision Dissociation)	MS2	0	80	55.3584	21771	A001.raw	24/232		46	36	21	0.000472554	1.05168e+07	55.38
	FALSE	High	Mascot (A6)	[R].AVFPSIVGRPR.[H]		2	16	P60710; P68033	D3Z2K3; P63268; E9Q2D1; E9Q1F2; F6WX90; P60710; D3YZY0; G3UZ07; P62737; G3UYG0; P68134; E9Q5F4; B1ATY1; P68033; P63260; E9Q606	0	2	1	0	1	1	599.856	1198.7	-1.03	-0.00062	1.39311e+06	HCD (High Energy Collision Dissociation)	MS2	12.085	80	38.5374	13483	A001.raw	8/88		46	32	17	0.000201812	2.74657e+06	38.51
	FALSE	High	Mascot (A6)	[R].TTGIVMDSGDGVTHTVPIYEGYALPHAILR.[L]		1	6	P60710	Q8BFZ3; E9Q1F2; P60710; G3UZ07; E9Q5F4; P63260	0	4	1	0	1	1	796.658	3183.61	-1.12	-0.00089	404520	HCD (High Energy Collision Dissociation)	MS2	9.9251	80	55.316	21750	A001.raw	8/232		43	36	21	0.000790394
	FALSE	High	Mascot (A6)	[R].AVFPSIVGRPR.[H]		2	16	P60710; P68033	D3Z2K3; P63268; E9Q2D1; E9Q1F2; F6WX90; P60710; D3YZY0; G3UZ07; P62737; G3UYG0; P68134; E9Q5F4; B1ATY1; P68033; P63260; E9Q606	0	2	1	0	1	1	599.856	1198.7	-1.33	-0.0008	9146057	HCD (High Energy Collision Dissociation)	MS2	1.40006	11.991	38.1948	13314	A001.raw	7/88		42	32	17	0.000432461	1.79458e+07	38.19
	FALSE	High	Mascot (A6)	[R].AVFPSIVGRPR.[H]		2	16	P60710; P68033	D3Z2K3; P63268; E9Q2D1; E9Q1F2; F6WX90; P60710; D3YZY0; G3UZ07; P62737; G3UYG0; P68134; E9Q5F4; B1ATY1; P68033; P63260; E9Q606	0	3	1	0	1	1	400.24	1198.71	-0.15	-6e-05	8997892	HCD (High Energy Collision Dissociation)	MS2	25.7988	6.982	37.6465	13054	A001.raw	13/88		38	32	17	0.00130902	8.84915e+06	37.6
	FALSE	High	Mascot (A6)	[K].EITALAPSTMK.[I]		2	9	P60710; P68033	P63268; E9Q1F2; P60710; F8WGM8; P62737; P68134; B1ATY1; P68033; P63260	0	2	1	0	1	1	581.313	1161.62	-0.15	-9e-05	5.35176e+06	HCD (High Energy Collision Dissociation)	MS2	18.8406	11.487	34.3349	11448	A001.raw	9/80		37	34	19	0.00264961	3.71351e+07	34.31
	FALSE	High	Mascot (A6)	[R].AVFPSIVGRPR.[H]		2	16	P60710; P68033	D3Z2K3; P63268; E9Q2D1; E9Q1F2; F6WX90; P60710; D3YZY0; G3UZ07; P62737; G3UYG0; P68134; E9Q5F4; B1ATY1; P68033; P63260; E9Q606	0	3	1	0	1	1	400.24	1198.71	-0.38	-0.00015	23968660	HCD (High Energy Collision Dissociation)	MS2	18.6703	2.346	37.9903	13218	A001.raw	11/88		36	32	17	0.00191402	70793120	37.89
	FALSE	High	Mascot (A6)	[R].DLTDYLMK.[I]		2	12	P60710; P68033	D3Z2K3; Q8BFZ3; P63268; E9Q1F2; P60710; D3YZY0; G3UZ07; P62737; P68134; E9Q5F4; P68033; P63260	0	2	0.8857	0	1	1	499.747	998.486	-0.12	-6e-05	1.41097e+06	HCD (High Energy Collision Dissociation)	MS2	12.8869	61.753	47.3763	17835	A001.raw	6/56		35	33	18	0.002677
	FALSE	High	Mascot (A6)	[R].VAPEEHPVLLTEAPLNPK.[A]		1	6	P60710	P60710; G3UZ07; G3UYG0; E9Q5F4; P63260; E9Q606	0	3	0.2857	0	1	1	652.026	1954.06	-1.05	-0.00068	1.75143e+06	HCD (High Energy Collision Dissociation)	MS2	36.998	29.118	42.85	15607	A001.raw	8/144		35	32	17	0.00207406	5.70819e+06	42.75
	FALSE	High	Mascot (A6)	[R].AVFPSIVGRPR.[H]		2	16	P60710; P68033	D3Z2K3; P63268; E9Q2D1; E9Q1F2; F6WX90; P60710; D3YZY0; G3UZ07; P62737; G3UYG0; P68134; E9Q5F4; B1ATY1; P68033; P63260; E9Q606	0	3	1	0	1	1	400.24	1198.71	0.46	0.00019	9006474	HCD (High Energy Collision Dissociation)	MS2	21.3024	4.226	38.3438	13387	A001.raw	12/88		33	32	17	0.00358053	39916396	38.29
FALSE	Master Protein	Q9WU78	Programmed cell death 6-interacting protein OS=Mus musculus GN=Pdcd6ip PE=1 SV=3	52.9344	34	193	34	1	869	96	6.52	High		High	0	324.65	30	High	0	4531	32
	Checked	Confidence	Identifying Node	Annotated Sequence	Modifications	# Protein Groups	# Proteins	Master Protein Accessions	Protein Accessions	# Missed Cleavages	Charge	DeltaScore	DeltaCn	Rank	Search Engine Rank	m/z [Da]	MH+ [Da]	DeltaM [ppm]	Deltam/z [Da]	Intensity	Activation Type	MS Order	Isolation Interference [%]	Ion Inject Time [ms]	RT [min]	First Scan	Spectrum File	Ions Matched	XCorr	Ions Score	Identity Strict	Identity Relaxed	Expectation Value	Area	Apex RT [min]
	FALSE	High	Sequest HT (A2)	[K].FLTALAQDGVINEEALSVTELDR.[I]		1	1	Q9WU78	Q9WU78	0	2	0.8138	0	1	1	1252.65	2504.29	1.08	0.00135	378600	HCD (High Energy Collision Dissociation)	MS2	6.3068	80	62.7069	25385	A001.raw	0/0	5.96
	FALSE	High	Sequest HT (A2)	[K].FLTALAQDGVINEEALSVTELDR.[I]		1	1	Q9WU78	Q9WU78	0	2	0.811	0	1	1	1252.65	2504.29	0.88	0.00111	747621	HCD (High Energy Collision Dissociation)	MS2	0	80	62.3478	25212	A001.raw	0/0	5.82					5.34712e+06	62.41
	FALSE	High	Sequest HT (A2)	[K].NLATAYDNFVELVANLK.[E]		1	1	Q9WU78	Q9WU78	0	2	0.7616	0	1	1	947.998	1894.99	-1.42	-0.00135	2.01437e+06	HCD (High Energy Collision Dissociation)	MS2	0	80	77.346	32349	A001.raw	0/0	5.62					8.78491e+06	77.42
	FALSE	High	Sequest HT (A2)	[K].NLATAYDNFVELVANLK.[E]		1	1	Q9WU78	Q9WU78	0	2	0.8011	0	1	1	947.998	1894.99	-0.97	-0.00092	858371	HCD (High Energy Collision Dissociation)	MS2	2.465	80	78.0303	32639	A001.raw	0/0	5.58
	FALSE	High	Sequest HT (A2)	[K].FLTALAQDGVINEEALSVTELDR.[I]		1	1	Q9WU78	Q9WU78	0	3	0.6667	0	1	1	835.434	2504.29	-0.22	-0.00018	2.01679e+06	HCD (High Energy Collision Dissociation)	MS2	27.3297	80	62.5752	25322	A001.raw	0/0	5.34					2.07607e+07	62.55
	FALSE	High	Sequest HT (A2)	[K].NLATAYDNFVELVANLK.[E]		1	1	Q9WU78	Q9WU78	0	2	0.7736	0	1	1	947.998	1894.99	-0.71	-0.00068	2.10373e+06	HCD (High Energy Collision Dissociation)	MS2	0	80	77.6894	32498	A001.raw	0/0	5.3					1.30768e+07	77.66
	FALSE	High	Sequest HT (A2)	[R].EPTVDISPDTVGTLSLIMLAQAQEVFFLK.[A]		1	1	Q9WU78	Q9WU78	0	3	0.85	0	1	1	1054.89	3162.66	-0.81	-0.00085	194710	HCD (High Energy Collision Dissociation)	MS2	36.6995	80	92.3948	38611	A001.raw	0/0	5.2					1.6249e+06	92.36
	FALSE	High	Sequest HT (A2)	[K].FIQQTYPSGGEEQAQYcR.[A]	C17(Carbamidomethyl)	1	1	Q9WU78	Q9WU78	0	2	0.7593	0	1	1	1081.48	2161.96	-1.24	-0.00134	1.24196e+06	HCD (High Energy Collision Dissociation)	MS2	0	80	33.0443	10822	A001.raw	0/0	5.11					4.96557e+06	33.05
	FALSE	High	Sequest HT (A2)	[K].FIQQTYPSGGEEQAQYcR.[A]	C17(Carbamidomethyl)	1	1	Q9WU78	Q9WU78	0	2	0.756	0	1	1	1081.48	2161.96	0.22	0.00024	1.05471e+06	HCD (High Energy Collision Dissociation)	MS2	33.9496	80	33.4031	10993	A001.raw	0/0	4.96					4.2345e+06	33.34
	FALSE	High	Sequest HT (A2)	[R].EPSAPSIPPPAYQSSPAAGHAAAPPTPAPR.[T]		1	1	Q9WU78	Q9WU78	0	3	0.8148	0	1	1	964.151	2890.44	-3.57	-0.00344	1115019	HCD (High Energy Collision Dissociation)	MS2	11.6247	80	37.9737	13210	A001.raw	0/0	4.86					6.76625e+06	37.98
	FALSE	High	Sequest HT (A2)	[R].EPSAPSIPPPAYQSSPAAGHAAAPPTPAPR.[T]		1	1	Q9WU78	Q9WU78	0	3	0.8239	0	1	1	964.153	2890.44	-1.48	-0.00143	1.12454e+06	HCD (High Energy Collision Dissociation)	MS2	0	80	37.6258	13043	A001.raw	0/0	4.77					1.52482e+07	37.72
	FALSE	High	Sequest HT (A2)	[K].NLATAYDNFVELVANLK.[E]		1	1	Q9WU78	Q9WU78	0	2	0.805	0	1	1	947.999	1894.99	-0.33	-0.00031	448134	HCD (High Energy Collision Dissociation)	MS2	6.11952	80	77.0045	32200	A001.raw	0/0	4.77
	FALSE	High	Sequest HT (A2)	[K].STSVVEQGGIQTVDQLIK.[E]		1	1	Q9WU78	Q9WU78	0	2	0.8186	0	1	1	951.512	1902.02	-0.18	-0.00017	3.33214e+06	HCD (High Energy Collision Dissociation)	MS2	0	80	50.8031	19518	A001.raw	0/0	4.74
	FALSE	High	Sequest HT (A2)	[R].EPSAPSIPPPAYQSSPAAGHAAAPPTPAPR.[T]		1	1	Q9WU78	Q9WU78	0	3	0.7827	0	1	1	964.154	2890.45	-0.34	-0.00033	1.43482e+06	HCD (High Energy Collision Dissociation)	MS2	0	80	37.2778	12870	A001.raw	0/0	4.74					6.40336e+06	37.2
	FALSE	High	Sequest HT (A2)	[K].ATLVKPTPVNVPVSQK.[F]		1	1	Q9WU78	Q9WU78	0	3	0.7797	0	1	1	560.002	1677.99	1.13	0.00063	2123615	HCD (High Energy Collision Dissociation)	MS2	4.92768	63.003	33.1943	10894	A001.raw	0/0	4.63					3.94683e+07	33.23
	FALSE	High	Sequest HT (A2)	[R].SALGRPLDKHEGALETLLR.[Y]		1	1	Q9WU78	Q9WU78	1	4	0.6652	0	1	1	519.795	2076.16	0.54	0.00028	1.09853e+06	HCD (High Energy Collision Dissociation)	MS2	30.4616	80	43.233	15791	A001.raw	0/0	4.6					1.17059e+07	43.19
	FALSE	High	Sequest HT (A2)	[K].MVPVSVQQSLAVFSQR.[K]		1	1	Q9WU78	Q9WU78	0	2	0.8112	0	1	1	888.477	1775.95	-0.59	-0.00053	1665048	HCD (High Energy Collision Dissociation)	MS2	3.5935	80	55.6644	21924	A001.raw	0/0	4.45					7.31683e+06	55.69
	FALSE	High	Sequest HT (A2)	[K].ATLVKPTPVNVPVSQK.[F]		1	1	Q9WU78	Q9WU78	0	3	0.8565	0	1	1	560.002	1677.99	0.36	0.0002	6085641	HCD (High Energy Collision Dissociation)	MS2	0.513216	16.563	33.5455	11063	A001.raw	0/0	4.39					1.51323e+07	33.52
	FALSE	High	Sequest HT (A2)	[K].LANQAADYFGDAFK.[Q]		1	1	Q9WU78	Q9WU78	0	2	0.6713	0	1	1	765.865	1530.72	0.48	0.00037	1.48237e+06	HCD (High Energy Collision Dissociation)	MS2	2.65456	35.939	48.4593	18368	A001.raw	0/0	4.29
	FALSE	High	Sequest HT (A2)	[R].EPSAPSIPPPAYQSSPAAGHAAAPPTPAPR.[T]		1	1	Q9WU78	Q9WU78	0	4	0.6449	0	1	1	723.369	2890.45	1.66	0.0012	193382	HCD (High Energy Collision Dissociation)	MS2	0	80	37.8875	13170	A001.raw	0/0	4.28					1.89502e+06	37.91
	FALSE	High	Sequest HT (A2)	[K].NLATAYDNFVELVANLK.[E]		1	1	Q9WU78	Q9WU78	0	3	0.6761	0	1	1	632.335	1894.99	-0.5	-0.00031	1528698	HCD (High Energy Collision Dissociation)	MS2	8.91	80	77.4368	32388	A001.raw	0/0	4.26					7.11224e+06	77.38
	FALSE	High	Sequest HT (A2)	[K].ATLVKPTPVNVPVSQK.[F]		1	1	Q9WU78	Q9WU78	0	2	0.8839	0	1	1	839.498	1677.99	-0.28	-0.00024	2.57466e+06	HCD (High Energy Collision Dissociation)	MS2	8.74851	80	33.5326	11057	A001.raw	0/0	4.22					5.47057e+07	33.42
	FALSE	High	Sequest HT (A2)	[R].SALGRPLDKHEGALETLLR.[Y]		1	1	Q9WU78	Q9WU78	1	3	0.7725	0	1	1	692.723	2076.15	-1.25	-0.00087	729912	HCD (High Energy Collision Dissociation)	MS2	20.2597	80	43.8031	16056	A001.raw	0/0	4.22					7.30766e+06	43.84
	FALSE	High	Sequest HT (A2)	[R].SALGRPLDKHEGALETLLR.[Y]		1	1	Q9WU78	Q9WU78	1	3	0.8071	0	1	1	692.723	2076.16	-0.37	-0.00026	1.3287e+06	HCD (High Energy Collision Dissociation)	MS2	4.35759	80	43.4467	15891	A001.raw	0/0	4.2					6.74294e+06	43.5
	FALSE	High	Sequest HT (A2)	[R].TPSNDLYKPLRAEGAK.[F]		1	1	Q9WU78	Q9WU78	1	4	0.7033	0	1	1	440.739	1759.93	-0.06	-3e-05	1.31176e+06	HCD (High Energy Collision Dissociation)	MS2	9.85499	67.238	28.5406	8694	A001.raw	0/0	4.18					1.28989e+07	28.57
	FALSE	High	Sequest HT (A2)	[R].EATTLANGVLASLNLPAAIEDVSGDTVPQSILTK.[S]		1	1	Q9WU78	Q9WU78	0	3	0.8208	0	1	1	1136.94	3408.81	0.31	0.00035	163348	HCD (High Energy Collision Dissociation)	MS2	5.32014	80	76.1864	31825	A001.raw	0/0	4.13					978310	76.17
	FALSE	High	Sequest HT (A2)	[K].STSVVEQGGIQTVDQLIK.[E]		1	1	Q9WU78	Q9WU78	0	2	0.7791	0	1	1	951.512	1902.02	-0.31	-0.00029	3.8236e+06	HCD (High Energy Collision Dissociation)	MS2	0	80	50.4523	19344	A001.raw	0/0	4.12					4916033	50.38
	FALSE	High	Sequest HT (A2)	[K].LANQAADYFGDAFK.[Q]		1	1	Q9WU78	Q9WU78	0	2	0.6019	0	1	1	765.864	1530.72	-0.79	-0.00061	2141447	HCD (High Energy Collision Dissociation)	MS2	3.33099	60.626	48.1034	18194	A001.raw	0/0	4.12					7.17039e+06	48.17
	FALSE	High	Sequest HT (A2)	[R].SALGRPLDKHEGALETLLR.[Y]		1	1	Q9WU78	Q9WU78	1	3	0.7971	0	1	1	692.723	2076.16	-0.1	-7e-05	667210	HCD (High Energy Collision Dissociation)	MS2	6.06276	80	44.2192	16260	A001.raw	0/0	4.09					4.42141e+06	44.21
	FALSE	High	Sequest HT (A2)	[K].FIQQTYPSGGEEQAQYcR.[A]	C17(Carbamidomethyl)	1	1	Q9WU78	Q9WU78	0	2	0.7941	0	1	1	1081.48	2161.96	-1.92	-0.00208	282095	HCD (High Energy Collision Dissociation)	MS2	0	80	32.7026	10657	A001.raw	0/0	4.08					1.59032e+06	32.69
	FALSE	High	Sequest HT (A2)	[K].FIQQTYPSGGEEQAQYcR.[A]	C17(Carbamidomethyl)	1	1	Q9WU78	Q9WU78	0	3	0.7679	0	1	1	721.326	2161.96	1.74	0.00126	540914	HCD (High Energy Collision Dissociation)	MS2	19.3403	80	33.0665	10833	A001.raw	0/0	4.05					8.24381e+06	33.1
	FALSE	High	Sequest HT (A2)	[R].EATTLANGVLASLNLPAAIEDVSGDTVPQSILTK.[S]		1	1	Q9WU78	Q9WU78	0	3	0.7625	0	1	1	1136.94	3408.8	-2.06	-0.00234	205388	HCD (High Energy Collision Dissociation)	MS2	0	80	75.4772	31490	A001.raw	0/0	4					2.22662e+06	75.46
	FALSE	High	Sequest HT (A2)	[R].EATTLANGVLASLNLPAAIEDVSGDTVPQSILTK.[S]		1	1	Q9WU78	Q9WU78	0	3	0.792	0	1	1	1136.94	3408.8	-2.27	-0.00258	321120	HCD (High Energy Collision Dissociation)	MS2	1.2384	80	75.8277	31656	A001.raw	0/0	3.99					8.33643e+06	75.84
	FALSE	High	Sequest HT (A2)	[K].STSVVEQGGIQTVDQLIK.[E]		1	1	Q9WU78	Q9WU78	0	2	0.7688	0	1	1	951.512	1902.02	-0.76	-0.00072	1.62822e+06	HCD (High Energy Collision Dissociation)	MS2	0	80	51.1572	19693	A001.raw	0/0	3.98					9.80566e+06	51.17
	FALSE	High	Sequest HT (A2)	[K].MVPVSVQQSLAVFSQR.[K]		1	1	Q9WU78	Q9WU78	0	2	0.8035	0	1	1	888.476	1775.95	-0.87	-0.00077	2777319	HCD (High Energy Collision Dissociation)	MS2	0	64.823	55.3128	21748	A001.raw	0/0	3.97					3.46592e+07	55.38
	FALSE	High	Sequest HT (A2)	[K].MVPVSVQQSLAVFSQR.[K]		1	1	Q9WU78	Q9WU78	0	2	0.8278	0	1	1	888.476	1775.94	-1.97	-0.00175	1.01947e+06	HCD (High Energy Collision Dissociation)	MS2	0	80	56.0136	22099	A001.raw	0/0	3.89					3.62221e+06	56.01
	FALSE	High	Sequest HT (A2)	[R].VPDLKDLDPIGK.[A]		1	1	Q9WU78	Q9WU78	1	3	0.75	0	1	1	437.25	1309.74	0.13	6e-05	3.88168e+06	HCD (High Energy Collision Dissociation)	MS2	14.3867	31.948	44.7542	16525	A001.raw	0/0	3.8					2.42039e+07	44.83
	FALSE	High	Sequest HT (A2)	[K].NLATAYDNFVELVANLK.[E]		1	1	Q9WU78	Q9WU78	0	2	0.7625	0	1	1	947.996	1894.98	-3.42	-0.00324	287238	HCD (High Energy Collision Dissociation)	MS2	9.36888	80	78.3732	32792	A001.raw	0/0	3.79					1.2395e+06	78.25
	FALSE	High	Sequest HT (A2)	[K].TSEVDLAKPLVK.[F]		1	1	Q9WU78	Q9WU78	0	2	0.7326	0	1	1	650.38	1299.75	0.22	0.00014	3.18521e+06	HCD (High Energy Collision Dissociation)	MS2	28.3314	45.628	33.7359	11156	A001.raw	0/0	3.59					1.86113e+07	33.71
	FALSE	High	Sequest HT (A2)	[K].LANQAADYFGDAFK.[Q]		1	1	Q9WU78	Q9WU78	0	2	0.6799	0	1	1	765.864	1530.72	-1.35	-0.00104	2.31817e+06	HCD (High Energy Collision Dissociation)	MS2	0	70.456	48.8175	18544	A001.raw	0/0	3.53					1.50001e+07	48.81
	FALSE	High	Sequest HT (A2)	[K].TSEVDLAKPLVK.[F]		1	1	Q9WU78	Q9WU78	0	3	0.7966	0	1	1	433.923	1299.75	1.8	0.00078	2.55898e+06	HCD (High Energy Collision Dissociation)	MS2	17.8924	32.409	33.4263	11005	A001.raw	0/0	3.49					1.57454e+07	33.46
	FALSE	High	Sequest HT (A2)	[K].TSEVDLAKPLVK.[F]		1	1	Q9WU78	Q9WU78	0	3	0.7826	0	1	1	433.922	1299.75	0.6	0.00026	1.91095e+06	HCD (High Energy Collision Dissociation)	MS2	3.91847	41.974	33.774	11175	A001.raw	0/0	3.45
	FALSE	High	Sequest HT (A2)	[K].FIQQTYPSGGEEQAQYcR.[A]	C17(Carbamidomethyl)	1	1	Q9WU78	Q9WU78	0	2	0.7654	0	1	1	1081.48	2161.95	-3.39	-0.00366	327278	HCD (High Energy Collision Dissociation)	MS2	8.66627	80	33.7647	11171	A001.raw	0/0	3.41					1.98888e+06	33.73
	FALSE	High	Sequest HT (A2)	[K].SLLSNLDEIKK.[E]		1	1	Q9WU78	Q9WU78	1	3	0.6826	0	1	1	420.579	1259.72	0.44	0.00019	1.76279e+06	HCD (High Energy Collision Dissociation)	MS2	24.8556	54.065	43.2312	15790	A001.raw	0/0	3.34					1.88518e+07	43.2
	FALSE	High	Sequest HT (A2)	[R].VPDLKDLDPIGK.[A]		1	1	Q9WU78	Q9WU78	1	3	0.7635	0	1	1	437.249	1309.73	-1.83	-0.0008	2.28081e+06	HCD (High Energy Collision Dissociation)	MS2	7.40254	21.778	44.4113	16355	A001.raw	0/0	3.34					8.41931e+07	44.53
	FALSE	High	Sequest HT (A2)	[K].SLLSNLDEIKK.[E]		1	1	Q9WU78	Q9WU78	1	3	0.6758	0	1	1	420.578	1259.72	0.23	0.0001	6.76918e+06	HCD (High Energy Collision Dissociation)	MS2	6.02588	12.259	42.5596	15461	A001.raw	0/0	3.3					6.33348e+07	42.6
	FALSE	High	Sequest HT (A2)	[R].SALGRPLDKHEGALETLLR.[Y]		1	1	Q9WU78	Q9WU78	1	3	0.7879	0	1	1	692.722	2076.15	-2.66	-0.00184	638502	HCD (High Energy Collision Dissociation)	MS2	33.6876	80	43.1044	15729	A001.raw	0/0	3.3					2311004	43.1
	FALSE	High	Sequest HT (A2)	[K].MVPVSVQQSLAVFSQR.[K]		1	1	Q9WU78	Q9WU78	0	2	0.7431	0	1	1	888.479	1775.95	1.54	0.00137	585415	HCD (High Energy Collision Dissociation)	MS2	0	80	54.9517	21569	A001.raw	0/0	3.27
	FALSE	High	Sequest HT (A2)	[K].MVPVSVQQSLAVFSQR.[K]		1	1	Q9WU78	Q9WU78	0	3	0.7547	0	1	1	592.654	1775.95	-0.32	-0.00019	1.51991e+06	HCD (High Energy Collision Dissociation)	MS2	6.87416	47.253	55.4415	21813	A001.raw	0/0	3.18					2.09422e+07	55.46
	FALSE	High	Sequest HT (A2)	[K].FYNELTEILVR.[F]		1	1	Q9WU78	Q9WU78	0	2	0.854	0	1	1	698.876	1396.75	-1.47	-0.00102	7.18583e+06	HCD (High Energy Collision Dissociation)	MS2	0	25.409	57.9831	23079	A001.raw	0/0	3.15					25440956	58
	FALSE	High	Sequest HT (A2)	[R].TPSNDLYKPLR.[A]		1	1	Q9WU78	Q9WU78	0	2	0.6943	0	1	1	652.354	1303.7	-0.37	-0.00024	1.48133e+06	HCD (High Energy Collision Dissociation)	MS2	5.29296	80	29.1884	9005	A001.raw	0/0	3.14					8512142	29.12
	FALSE	High	Sequest HT (A2)	[K].FYNELTEILVR.[F]		1	1	Q9WU78	Q9WU78	0	2	0.8521	0	1	1	698.877	1396.75	-0.33	-0.00023	3103134	HCD (High Energy Collision Dissociation)	MS2	0	49.437	58.3393	23255	A001.raw	0/0	3.11					4.08153e+06	58.31
	FALSE	High	Sequest HT (A2)	[K].NLATAYDNFVELVANLK.[E]		1	1	Q9WU78	Q9WU78	0	3	0.6752	0	1	1	632.334	1894.99	-1.27	-0.0008	845350	HCD (High Energy Collision Dissociation)	MS2	19.0225	80	77.7804	32536	A001.raw	0/0	3.11					1.34257e+07	77.76
	FALSE	High	Sequest HT (A2)	[R].TPSNDLYKPLR.[A]		1	1	Q9WU78	Q9WU78	0	3	0.6161	0	1	1	435.238	1303.7	0	0	3.40752e+06	HCD (High Energy Collision Dissociation)	MS2	35.8326	18.503	29.0208	8923	A001.raw	0/0	3.1					5.20593e+06	29.02
	FALSE	High	Sequest HT (A2)	[R].NREILEESLR.[L]		1	1	Q9WU78	Q9WU78	1	2	0.5714	0	1	1	629.841	1258.67	-0.59	-0.00037	2258166	HCD (High Energy Collision Dissociation)	MS2	3.2461	58.185	31.2664	9984	A001.raw	0/0	3.08					7.81301e+06	31.19
	FALSE	High	Sequest HT (A2)	[R].TPSNDLYKPLR.[A]		1	1	Q9WU78	Q9WU78	0	2	0.6765	0	1	1	652.354	1303.7	0.1	7e-05	692092	HCD (High Energy Collision Dissociation)	MS2	0	80	28.8483	8844	A001.raw	0/0	3.06					2.64599e+06	28.88
	FALSE	High	Sequest HT (A2)	[R].VPDLKDLDPIGK.[A]		1	1	Q9WU78	Q9WU78	1	2	0.7195	0	1	1	655.372	1309.74	-0.14	-9e-05	1.67207e+06	HCD (High Energy Collision Dissociation)	MS2	32.9844	52.389	44.3897	16344	A001.raw	0/0	3.03					2.9734e+06	44.39
	FALSE	High	Sequest HT (A2)	[R].EPSAPSIPPPAYQSSPAAGHAAAPPTPAPR.[T]		1	1	Q9WU78	Q9WU78	0	3	0.7517	0	1	1	964.155	2890.45	0.42	0.0004	230235	HCD (High Energy Collision Dissociation)	MS2	0	80	38.6862	13557	A001.raw	0/0	3.02					812430	38.63
	FALSE	High	Sequest HT (A2)	[K].MVPVSVQQSLAVFSQR.[K]		1	1	Q9WU78	Q9WU78	0	3	0.6944	0	1	1	592.654	1775.95	0.19	0.00011	1.21812e+06	HCD (High Energy Collision Dissociation)	MS2	12.4834	80	55.0942	21639	A001.raw	0/0	3.01					3.12949e+07	55.16
	FALSE	High	Sequest HT (A2)	[K].MVPVSVQQSLAVFSQR.[K]		1	1	Q9WU78	Q9WU78	0	3	0.6983	0	1	1	592.654	1775.95	-0.01	-1e-05	1.27833e+06	HCD (High Energy Collision Dissociation)	MS2	18.2408	80	55.7922	21989	A001.raw	0/0	2.95					2.40915e+07	55.69
	FALSE	High	Sequest HT (A2)	[K].SLLSNLDEIKK.[E]		1	1	Q9WU78	Q9WU78	1	2	0.6928	0	1	1	630.364	1259.72	0.26	0.00016	2.57815e+06	HCD (High Energy Collision Dissociation)	MS2	14.0337	48.529	43.0562	15706	A001.raw	0/0	2.93					5.51147e+06	42.99
	FALSE	High	Sequest HT (A2)	[K].KDNDFIYHDR.[V]		1	1	Q9WU78	Q9WU78	1	3	0.7604	0	1	1	441.542	1322.61	-0.04	-2e-05	659678	HCD (High Energy Collision Dissociation)	MS2	15.7785	80	23.445	6286	A001.raw	0/0	2.88					1.48224e+06	23.46
	FALSE	High	Sequest HT (A2)	[K].SLLSNLDEIKK.[E]		1	1	Q9WU78	Q9WU78	1	2	0.684	0	1	1	630.364	1259.72	-0.51	-0.00032	5077743	HCD (High Energy Collision Dissociation)	MS2	3.2681	20.29	42.7125	15536	A001.raw	0/0	2.88					24456787	42.76
	FALSE	High	Sequest HT (A2)	[K].LALASLGYEK.[S]		1	1	Q9WU78	Q9WU78	0	2	0.6934	0	1	1	532.803	1064.6	0.84	0.00045	814257	HCD (High Energy Collision Dissociation)	MS2	23.8424	80	40.2505	14332	A001.raw	0/0	2.87					3.19545e+06	40.2
	FALSE	High	Sequest HT (A2)	[K].NIQVSHQEFSK.[M]		1	1	Q9WU78	Q9WU78	0	2	0.7719	0	1	1	658.833	1316.66	-0.64	-0.00042	4.2841e+06	HCD (High Energy Collision Dissociation)	MS2	4.56668	30.014	24.4811	6781	A001.raw	0/0	2.85					1.65062e+07	24.42
	FALSE	High	Sequest HT (A2)	[R].LLDEEEATDNDLR.[A]		1	1	Q9WU78	Q9WU78	0	2	0.6408	0	1	1	766.857	1532.71	-1.05	-0.00081	512667	HCD (High Energy Collision Dissociation)	MS2	60.4458	80	33.8831	11229	A001.raw	0/0	2.84					1.10639e+06	33.84
	FALSE	High	Sequest HT (A2)	[R].NREILEESLR.[L]		1	1	Q9WU78	Q9WU78	1	2	0.5409	0	1	1	629.841	1258.68	0.57	0.00036	926500	HCD (High Energy Collision Dissociation)	MS2	10.2206	80	31.6252	10148	A001.raw	0/0	2.81					2.70654e+06	31.65
	FALSE	High	Sequest HT (A2)	[K].cSDIVFAR.[K]	C1(Carbamidomethyl)	1	1	Q9WU78	Q9WU78	0	2	0.669	0	1	1	484.236	967.466	-0.92	-0.00045	1.39046e+06	HCD (High Energy Collision Dissociation)	MS2	41.0513	65.306	31.6727	10169	A001.raw	0/0	2.81					1.80792e+06	31.65
	FALSE	High	Sequest HT (A2)	[K].cSDIVFAR.[K]	C1(Carbamidomethyl)	1	1	Q9WU78	Q9WU78	0	2	0.6619	0	1	1	484.236	967.466	-0.99	-0.00048	1.21346e+06	HCD (High Energy Collision Dissociation)	MS2	14.6049	47.823	32.0177	10326	A001.raw	0/0	2.81					4.40158e+06	31.99
	FALSE	High	Sequest HT (A2)	[R].NREILEESLR.[L]		1	1	Q9WU78	Q9WU78	1	2	0.5935	0	1	1	629.842	1258.68	1.15	0.00072	2.33819e+06	HCD (High Energy Collision Dissociation)	MS2	2.23939	48.453	30.9153	9823	A001.raw	0/0	2.78					3.45856e+06	30.9
	FALSE	High	Sequest HT (A2)	[R].YYDQIcSIEPK.[F]	C6(Carbamidomethyl)	1	1	Q9WU78	Q9WU78	0	2	0.5683	0	1	1	708.33	1415.65	0.45	0.00032	1.36746e+06	HCD (High Energy Collision Dissociation)	MS2	10.2757	80	37.1697	12817	A001.raw	0/0	2.71					1.14483e+07	37.14
	FALSE	High	Sequest HT (A2)	[R].LQHAAELIK.[N]		1	1	Q9WU78	Q9WU78	0	2	0.583	0	1	1	511.804	1022.6	0.46	0.00024	3.66425e+06	HCD (High Energy Collision Dissociation)	MS2	25.2615	25.74	24.5265	6804	A001.raw	0/0	2.71					7.18899e+06	24.55
	FALSE	High	Sequest HT (A2)	[K].LALASLGYEK.[S]		1	1	Q9WU78	Q9WU78	0	2	0.7074	0	1	1	532.803	1064.6	0.38	0.0002	2.3215e+06	HCD (High Energy Collision Dissociation)	MS2	7.12858	38.182	40.6037	14505	A001.raw	0/0	2.7					8.2852e+06	40.56
	FALSE	High	Sequest HT (A2)	[R].NREILEESLR.[L]		1	1	Q9WU78	Q9WU78	1	2	0.5489	0	1	1	629.841	1258.68	0.57	0.00036	794289	HCD (High Energy Collision Dissociation)	MS2	44.4019	80	30.5596	9652	A001.raw	0/0	2.66					4.05081e+06	30.57
	FALSE	High	Sequest HT (A2)	[R].LQHAAELIK.[N]		1	1	Q9WU78	Q9WU78	0	2	0.5714	0	1	1	511.804	1022.6	1	0.00051	4955334	HCD (High Energy Collision Dissociation)	MS2	10.158	18.777	24.8827	6974	A001.raw	0/0	2.66					1.48694e+07	24.86
	FALSE	High	Sequest HT (A2)	[K].VQESLKKQEGLLK.[N]		1	1	Q9WU78	Q9WU78	2	3	0.4924	0	1	1	500.631	1499.88	-0.52	-0.00026	717941	HCD (High Energy Collision Dissociation)	MS2	40.925	68.648	26.0457	7516	A001.raw	0/0	2.64					3.55185e+06	26.09
	FALSE	High	Sequest HT (A2)	[K].ATLVKPTPVNVPVSQK.[F]		1	1	Q9WU78	Q9WU78	0	2	0.8057	0	1	1	839.499	1677.99	0.73	0.00062	254743	HCD (High Energy Collision Dissociation)	MS2	46.1065	80	33.181	10888	A001.raw	0/0	2.47
	FALSE	High	Sequest HT (A2)	[K].SLLSNLDEIKK.[E]		1	1	Q9WU78	Q9WU78	1	2	0.5959	0	1	1	630.362	1259.72	-2.26	-0.00142	642414	HCD (High Energy Collision Dissociation)	MS2	0	80	43.4087	15874	A001.raw	0/0	2.45					6.15414e+06	43.44
	FALSE	High	Sequest HT (A2)	[K].TMQGSEVVSVLK.[S]		1	1	Q9WU78	Q9WU78	0	2	0.6762	0	1	1	639.342	1277.68	-0.89	-0.00057	5.95413e+06	HCD (High Energy Collision Dissociation)	MS2	0	22.827	38.9176	13672	A001.raw	0/0	2.44					9.98146e+06	38.92
	FALSE	High	Sequest HT (A2)	[K].SLLSNLDEIKK.[E]		1	1	Q9WU78	Q9WU78	1	2	0.6872	0	1	1	630.365	1259.72	1.23	0.00078	1402718	HCD (High Energy Collision Dissociation)	MS2	46.2917	80	42.3658	15365	A001.raw	0/0	2.43					3.57939e+06	42.4
	FALSE	High	Sequest HT (A2)	[K].cSDIVFAR.[K]	C1(Carbamidomethyl)	1	1	Q9WU78	Q9WU78	0	2	0.692	0	1	1	484.237	967.466	-0.67	-0.00032	1.0061e+06	HCD (High Energy Collision Dissociation)	MS2	14.5082	80	32.386	10503	A001.raw	0/0	2.37					1.36156e+06	32.37
	FALSE	High	Sequest HT (A2)	[R].DELLKDLQQSIAR.[E]		1	1	Q9WU78	Q9WU78	1	2	0.7627	0	1	1	764.92	1528.83	0.15	0.00012	295810	HCD (High Energy Collision Dissociation)	MS2	0	80	50.9638	19597	A001.raw	0/0	2.36					4102669	50.93
	FALSE	High	Sequest HT (A2)	[K].NLATAYDNFVELVANLK.[E]		1	1	Q9WU78	Q9WU78	0	2	0.6567	0	1	1	947.997	1894.99	-2.52	-0.00239	98360.6	HCD (High Energy Collision Dissociation)	MS2	14.0418	80	78.7531	32959	A001.raw	0/0	2.33					677039	78.84
	FALSE	High	Sequest HT (A2)	[R].YYDQIcSIEPK.[F]	C6(Carbamidomethyl)	1	1	Q9WU78	Q9WU78	0	2	0.4914	0	1	1	708.33	1415.65	1.4	0.00099	374349	HCD (High Energy Collision Dissociation)	MS2	39.6236	80	36.8204	12649	A001.raw	0/0	2.32					3.49977e+06	36.89
	FALSE	High	Sequest HT (A2)	[K].TMQGSEVVSVLK.[S]		1	1	Q9WU78	Q9WU78	0	2	0.6753	0	1	1	639.342	1277.68	0.26	0.00017	6.07313e+06	HCD (High Energy Collision Dissociation)	MS2	14.012	21.445	38.5784	13504	A001.raw	0/0	2.31					1.59455e+07	38.56
	FALSE	High	Sequest HT (A2)	[K].TMQGSEVVSVLK.[S]		1	1	Q9WU78	Q9WU78	0	2	0.6316	0	1	1	639.341	1277.68	-1.27	-0.00081	2.36336e+06	HCD (High Energy Collision Dissociation)	MS2	1.25021	60.422	39.2751	13852	A001.raw	0/0	2.28					4.34962e+06	39.37
	FALSE	High	Sequest HT (A2)	[K].FTDLFEK.[M]		1	1	Q9WU78	Q9WU78	0	2	0.5	0	1	1	450.229	899.451	0.34	0.00015	6815288	HCD (High Energy Collision Dissociation)	MS2	5.24252	12.291	39.626	14025	A001.raw	0/0	2.26
	FALSE	High	Sequest HT (A2)	[K].KDNDFIYHDR.[V]		1	1	Q9WU78	Q9WU78	1	2	0.5714	0	1	1	661.811	1322.61	1.91	0.00126	124416	HCD (High Energy Collision Dissociation)	MS2	0	80	23.2846	6212	A001.raw	0/0	2.24					381032	23.3
	FALSE	High	Sequest HT (A2)	[K].NIQVSHQEFSK.[M]		1	1	Q9WU78	Q9WU78	0	2	0.6792	0	1	1	658.833	1316.66	0.01	0	589769	HCD (High Energy Collision Dissociation)	MS2	41.9716	80	24.137	6619	A001.raw	0/0	2.12					593468	24.12
	FALSE	High	Sequest HT (A2)	[K].ELPELLQR.[N]		1	1	Q9WU78	Q9WU78	0	2	0.6967	0	1	1	499.288	997.569	0.86	0.00043	1.71669e+06	HCD (High Energy Collision Dissociation)	MS2	23.0079	62.999	40.6052	14506	A001.raw	0/0	2.11
	FALSE	High	Sequest HT (A2)	[K].TmQGSEVVSVLK.[S]	M2(Oxidation)	1	1	Q9WU78	Q9WU78	0	2	0.6411	0	1	1	647.34	1293.67	0.41	0.00027	471261	HCD (High Energy Collision Dissociation)	MS2	30.0343	80	34.0958	11334	A001.raw	0/0	2.09					2.64184e+06	34.05
	FALSE	High	Sequest HT (A2)	[K].FTDLFEK.[M]		1	1	Q9WU78	Q9WU78	0	2	0.5694	0	1	1	450.229	899.451	-0.33	-0.00015	4.0485e+06	HCD (High Energy Collision Dissociation)	MS2	21.1458	20.264	39.2763	13853	A001.raw	0/0	2.09					7.01949e+06	39.25
	FALSE	High	Mascot (A6)	[K].FLTALAQDGVINEEALSVTELDR.[I]		1	1	Q9WU78	Q9WU78	0	2	1	0	1	1	1252.65	2504.29	0.88	0.00111	747621	HCD (High Energy Collision Dissociation)	MS2	0	80	62.3478	25212	A001.raw	14/240		126	35	20	3.31296e-12	5.34712e+06	62.41
	FALSE	High	Mascot (A6)	[K].FLTALAQDGVINEEALSVTELDR.[I]		1	1	Q9WU78	Q9WU78	0	3	0.8716	0	1	1	835.434	2504.29	-0.22	-0.00018	2.01679e+06	HCD (High Energy Collision Dissociation)	MS2	27.3297	80	62.5752	25322	A001.raw	12/240		109	35	20	1.82786e-10	2.07607e+07	62.55
	FALSE	High	Mascot (A6)	[K].NLATAYDNFVELVANLK.[E]		1	1	Q9WU78	Q9WU78	0	2	1	0	1	1	947.996	1894.98	-3.42	-0.00324	287238	HCD (High Energy Collision Dissociation)	MS2	9.36888	80	78.3732	32792	A001.raw	11/192		100	35	20	1.48435e-09	1.2395e+06	78.25
	FALSE	High	Mascot (A6)	[K].FLTALAQDGVINEEALSVTELDR.[I]		1	1	Q9WU78	Q9WU78	0	2	1	0	1	1	1252.65	2504.29	1.08	0.00135	378600	HCD (High Energy Collision Dissociation)	MS2	6.3068	80	62.7069	25385	A001.raw	17/240		97	35	20	2.7132e-09
	FALSE	High	Mascot (A6)	[K].STSVVEQGGIQTVDQLIK.[E]		1	1	Q9WU78	Q9WU78	0	2	1	0	1	1	951.512	1902.02	-0.76	-0.00072	1.62822e+06	HCD (High Energy Collision Dissociation)	MS2	0	80	51.1572	19693	A001.raw	13/180		93	35	19	6.26003e-09	9.80566e+06	51.17
	FALSE	High	Mascot (A6)	[K].NLATAYDNFVELVANLK.[E]		1	1	Q9WU78	Q9WU78	0	2	1	0	1	1	947.999	1894.99	-0.33	-0.00031	448134	HCD (High Energy Collision Dissociation)	MS2	6.11952	80	77.0045	32200	A001.raw	13/192		90	35	20	1.33126e-08
	FALSE	High	Mascot (A6)	[K].NLATAYDNFVELVANLK.[E]		1	1	Q9WU78	Q9WU78	0	2	1	0	1	1	947.998	1894.99	-0.71	-0.00068	2.10373e+06	HCD (High Energy Collision Dissociation)	MS2	0	80	77.6894	32498	A001.raw	13/192		90	35	20	1.37046e-08	1.30768e+07	77.66
	FALSE	High	Mascot (A6)	[K].NLATAYDNFVELVANLK.[E]		1	1	Q9WU78	Q9WU78	0	2	1	0	1	1	947.998	1894.99	-1.42	-0.00135	2.01437e+06	HCD (High Energy Collision Dissociation)	MS2	0	80	77.346	32349	A001.raw	13/192		90	35	20	1.29999e-08	8.78491e+06	77.42
	FALSE	High	Mascot (A6)	[K].NLATAYDNFVELVANLK.[E]		1	1	Q9WU78	Q9WU78	0	2	1	0	1	1	947.998	1894.99	-0.97	-0.00092	858371	HCD (High Energy Collision Dissociation)	MS2	2.465	80	78.0303	32639	A001.raw	13/192		88	35	20	2.31346e-08
	FALSE	High	Mascot (A6)	[K].LANQAADYFGDAFK.[Q]		1	1	Q9WU78	Q9WU78	0	2	1	0	1	1	765.864	1530.72	-1.35	-0.00104	2.31817e+06	HCD (High Energy Collision Dissociation)	MS2	0	70.456	48.8175	18544	A001.raw	13/148		88	37	21	3.13731e-08	1.50001e+07	48.81
	FALSE	High	Mascot (A6)	[K].NLATAYDNFVELVANLK.[E]		1	1	Q9WU78	Q9WU78	0	2	1	0	1	1	947.997	1894.99	-2.52	-0.00239	98360.6	HCD (High Energy Collision Dissociation)	MS2	14.0418	80	78.7531	32959	A001.raw	10/192		87	36	20	2.92488e-08	677039	78.84
	FALSE	High	Mascot (A6)	[R].EATTLANGVLASLNLPAAIEDVSGDTVPQSILTK.[S]		1	1	Q9WU78	Q9WU78	0	3	1	0	1	1	1136.94	3408.8	-2.27	-0.00258	321120	HCD (High Energy Collision Dissociation)	MS2	1.2384	80	75.8277	31656	A001.raw	12/372		84	31	16	2.2822e-08	8.33643e+06	75.84
	FALSE	High	Mascot (A6)	[K].LANQAADYFGDAFK.[Q]		1	1	Q9WU78	Q9WU78	0	2	1	0	1	1	765.865	1530.72	0.48	0.00037	1.48237e+06	HCD (High Energy Collision Dissociation)	MS2	2.65456	35.939	48.4593	18368	A001.raw	13/148		82	36	21	1.01204e-07
	FALSE	High	Mascot (A6)	[K].MVPVSVQQSLAVFSQR.[K]		1	1	Q9WU78	Q9WU78	0	2	1	0	1	1	888.476	1775.95	-0.87	-0.00077	2777319	HCD (High Energy Collision Dissociation)	MS2	0	64.823	55.3128	21748	A001.raw	14/156		82	34	19	6.64443e-08	3.46592e+07	55.38
	FALSE	High	Mascot (A6)	[K].MVPVSVQQSLAVFSQR.[K]		1	1	Q9WU78	Q9WU78	0	3	1	0	1	1	592.654	1775.95	-0.32	-0.00019	1.51991e+06	HCD (High Energy Collision Dissociation)	MS2	6.87416	47.253	55.4415	21813	A001.raw	9/156		82	35	19	7.17094e-08	2.09422e+07	55.46
	FALSE	High	Mascot (A6)	[K].TSEVDLAKPLVK.[F]		1	1	Q9WU78	Q9WU78	0	2	1	0	1	1	650.38	1299.75	0.22	0.00014	3.18521e+06	HCD (High Energy Collision Dissociation)	MS2	28.3314	45.628	33.7359	11156	A001.raw	10/104		80	32	17	7.82145e-08	1.86113e+07	33.71
	FALSE	High	Mascot (A6)	[K].MVPVSVQQSLAVFSQR.[K]		1	1	Q9WU78	Q9WU78	0	2	1	0	1	1	888.476	1775.94	-1.97	-0.00175	1.01947e+06	HCD (High Energy Collision Dissociation)	MS2	0	80	56.0136	22099	A001.raw	12/156		79	35	19	1.40145e-07	3.62221e+06	56.01
	FALSE	High	Mascot (A6)	[K].NLATAYDNFVELVANLK.[E]		1	1	Q9WU78	Q9WU78	0	3	1	0	1	1	632.335	1894.99	-0.5	-0.00031	1528698	HCD (High Energy Collision Dissociation)	MS2	8.91	80	77.4368	32388	A001.raw	9/192		79	35	20	1.93053e-07	7.11224e+06	77.38
	FALSE	High	Mascot (A6)	[R].VPDLKDLDPIGK.[A]		1	1	Q9WU78	Q9WU78	1	2	1	0	1	1	655.372	1309.74	-0.14	-9e-05	1.67207e+06	HCD (High Energy Collision Dissociation)	MS2	32.9844	52.389	44.3897	16344	A001.raw	11/116		79	32	17	1.00996e-07	2.9734e+06	44.39
	FALSE	High	Mascot (A6)	[R].TPSNDLYKPLR.[A]		1	1	Q9WU78	Q9WU78	0	2	1	0	1	1	652.354	1303.7	-0.37	-0.00024	1.48133e+06	HCD (High Energy Collision Dissociation)	MS2	5.29296	80	29.1884	9005	A001.raw	9/108		77	34	19	2.14448e-07	8512142	29.12
	FALSE	High	Mascot (A6)	[K].FIQQTYPSGGEEQAQYcR.[A]	C17(Carbamidomethyl)	1	1	Q9WU78	Q9WU78	0	2	1	0	1	1	1081.48	2161.95	-3.39	-0.00366	327278	HCD (High Energy Collision Dissociation)	MS2	8.66627	80	33.7647	11171	A001.raw	13/196		75	38	23	8.13877e-07	1.98888e+06	33.73
	FALSE	High	Mascot (A6)	[K].FIQQTYPSGGEEQAQYcR.[A]	C17(Carbamidomethyl)	1	1	Q9WU78	Q9WU78	0	2	1	0	1	1	1081.48	2161.96	-1.24	-0.00134	1.24196e+06	HCD (High Energy Collision Dissociation)	MS2	0	80	33.0443	10822	A001.raw	16/196		74	38	23	9.82429e-07	4.96557e+06	33.05
	FALSE	High	Mascot (A6)	[K].MVPVSVQQSLAVFSQR.[K]		1	1	Q9WU78	Q9WU78	0	2	1	0	1	1	888.479	1775.95	1.54	0.00137	585415	HCD (High Energy Collision Dissociation)	MS2	0	80	54.9517	21569	A001.raw	12/156		73	35	20	6.39014e-07
	FALSE	High	Mascot (A6)	[K].STSVVEQGGIQTVDQLIK.[E]		1	1	Q9WU78	Q9WU78	0	2	1	0	1	1	951.512	1902.02	-0.18	-0.00017	3.33214e+06	HCD (High Energy Collision Dissociation)	MS2	0	80	50.8031	19518	A001.raw	16/180		73	34	19	5.78299e-07
	FALSE	High	Mascot (A6)	[K].FYNELTEILVR.[F]		1	1	Q9WU78	Q9WU78	0	2	1	0	1	1	698.877	1396.75	-0.33	-0.00023	3103134	HCD (High Energy Collision Dissociation)	MS2	0	49.437	58.3393	23255	A001.raw	7/112		73	33	17	4.07469e-07	4.08153e+06	58.31
	FALSE	High	Mascot (A6)	[R].TPSNDLYKPLR.[A]		1	1	Q9WU78	Q9WU78	0	2	1	0	1	1	652.354	1303.7	0.1	7e-05	692092	HCD (High Energy Collision Dissociation)	MS2	0	80	28.8483	8844	A001.raw	9/108		73	33	18	4.95248e-07	2.64599e+06	28.88
	FALSE	High	Mascot (A6)	[K].TMQGSEVVSVLK.[S]		1	1	Q9WU78	Q9WU78	0	2	1	0	1	1	639.342	1277.68	-0.89	-0.00057	5.95413e+06	HCD (High Energy Collision Dissociation)	MS2	0	22.827	38.9176	13672	A001.raw	10/124		71	35	20	1.08965e-06	9.98146e+06	38.92
	FALSE	High	Mascot (A6)	[K].MVPVSVQQSLAVFSQR.[K]		1	1	Q9WU78	Q9WU78	0	3	1	0	1	1	592.654	1775.95	-0.01	-1e-05	1.27833e+06	HCD (High Energy Collision Dissociation)	MS2	18.2408	80	55.7922	21989	A001.raw	8/156		69	35	19	1.45474e-06	2.40915e+07	55.69
	FALSE	High	Mascot (A6)	[K].SLLSNLDEIKK.[E]		1	1	Q9WU78	Q9WU78	1	2	0.9706	0	1	1	630.364	1259.72	0.26	0.00016	2.57815e+06	HCD (High Energy Collision Dissociation)	MS2	14.0337	48.529	43.0562	15706	A001.raw	9/104		68	33	18	1.25833e-06	5.51147e+06	42.99
	FALSE	High	Mascot (A6)	[K].FYNELTEILVR.[F]		1	1	Q9WU78	Q9WU78	0	2	1	0	1	1	698.876	1396.75	-1.47	-0.00102	7.18583e+06	HCD (High Energy Collision Dissociation)	MS2	0	25.409	57.9831	23079	A001.raw	7/112		67	33	18	1.77616e-06	25440956	58
	FALSE	High	Mascot (A6)	[K].FIQQTYPSGGEEQAQYcR.[A]	C17(Carbamidomethyl)	1	1	Q9WU78	Q9WU78	0	3	1	0	1	1	721.326	2161.96	1.74	0.00126	540914	HCD (High Energy Collision Dissociation)	MS2	19.3403	80	33.0665	10833	A001.raw	11/196		67	38	23	5.8438e-06	8.24381e+06	33.1
	FALSE	High	Mascot (A6)	[K].MVPVSVQQSLAVFSQR.[K]		1	1	Q9WU78	Q9WU78	0	2	1	0	1	1	888.477	1775.95	-0.59	-0.00053	1665048	HCD (High Energy Collision Dissociation)	MS2	3.5935	80	55.6644	21924	A001.raw	12/156		66	34	19	2.84032e-06	7.31683e+06	55.69
	FALSE	High	Mascot (A6)	[K].LANQAADYFGDAFK.[Q]		1	1	Q9WU78	Q9WU78	0	2	1	0	1	1	765.864	1530.72	-0.79	-0.00061	2141447	HCD (High Energy Collision Dissociation)	MS2	3.33099	60.626	48.1034	18194	A001.raw	11/148		66	36	21	4.4037e-06	7.17039e+06	48.17
	FALSE	High	Mascot (A6)	[K].FIQQTYPSGGEEQAQYcR.[A]	C17(Carbamidomethyl)	1	1	Q9WU78	Q9WU78	0	2	1	0	1	1	1081.48	2161.96	-1.92	-0.00208	282095	HCD (High Energy Collision Dissociation)	MS2	0	80	32.7026	10657	A001.raw	13/196		65	38	23	8.8945e-06	1.59032e+06	32.69
	FALSE	High	Mascot (A6)	[K].SLLSNLDEIKK.[E]		1	1	Q9WU78	Q9WU78	1	2	0.9375	0	1	1	630.364	1259.72	-0.51	-0.00032	5077743	HCD (High Energy Collision Dissociation)	MS2	3.2681	20.29	42.7125	15536	A001.raw	9/104		64	34	18	3.79318e-06	24456787	42.76
	FALSE	High	Mascot (A6)	[K].KDNDFIYHDR.[V]		1	1	Q9WU78	Q9WU78	1	2	1	0	1	1	661.811	1322.61	1.17	0.00077	128417	HCD (High Energy Collision Dissociation)	MS2	28.5412	80	23.6259	6374	A001.raw	7/108		64	35	20	5.48205e-06	423767	23.64
	FALSE	High	Mascot (A6)	[K].SLLSNLDEIKK.[E]		1	1	Q9WU78	Q9WU78	1	2	0.9683	0	1	1	630.365	1259.72	1.23	0.00078	1402718	HCD (High Energy Collision Dissociation)	MS2	46.2917	80	42.3658	15365	A001.raw	9/104		63	33	17	3.44739e-06	3.57939e+06	42.4
	FALSE	High	Mascot (A6)	[K].KDNDFIYHDR.[V]		1	1	Q9WU78	Q9WU78	1	2	0.9841	0	1	1	661.811	1322.61	1.91	0.00126	124416	HCD (High Energy Collision Dissociation)	MS2	0	80	23.2846	6212	A001.raw	9/108		63	35	20	7.04452e-06	381032	23.3
	FALSE	High	Mascot (A6)	[K].FIQQTYPSGGEEQAQYcR.[A]	C17(Carbamidomethyl)	1	1	Q9WU78	Q9WU78	0	2	1	0	1	1	1081.48	2161.96	0.22	0.00024	1.05471e+06	HCD (High Energy Collision Dissociation)	MS2	33.9496	80	33.4031	10993	A001.raw	15/196		62	38	23	1.73798e-05	4.2345e+06	33.34
	FALSE	High	Mascot (A6)	[R].EATTLANGVLASLNLPAAIEDVSGDTVPQSILTK.[S]		1	1	Q9WU78	Q9WU78	0	3	1	0	1	1	1136.94	3408.8	-2.06	-0.00234	205388	HCD (High Energy Collision Dissociation)	MS2	0	80	75.4772	31490	A001.raw	15/372		60	31	16	4.95783e-06	2.22662e+06	75.46
	FALSE	High	Mascot (A6)	[K].STSVVEQGGIQTVDQLIK.[E]		1	1	Q9WU78	Q9WU78	0	2	1	0	1	1	951.512	1902.02	-0.31	-0.00029	3.8236e+06	HCD (High Energy Collision Dissociation)	MS2	0	80	50.4523	19344	A001.raw	12/180		60	35	19	1.24999e-05	4916033	50.38
	FALSE	High	Mascot (A6)	[R].EPTVDISPDTVGTLSLIMLAQAQEVFFLK.[A]		1	1	Q9WU78	Q9WU78	0	3	1	0	1	1	1054.89	3162.66	-0.81	-0.00085	194710	HCD (High Energy Collision Dissociation)	MS2	36.6995	80	92.3948	38611	A001.raw	11/256		59	34	19	1.14025e-05	1.6249e+06	92.36
	FALSE	High	Mascot (A6)	[R].YYDQIcSIEPK.[F]	C6(Carbamidomethyl)	1	1	Q9WU78	Q9WU78	0	2	0.9831	0	1	1	708.33	1415.65	0.45	0.00032	1.36746e+06	HCD (High Energy Collision Dissociation)	MS2	10.2757	80	37.1697	12817	A001.raw	9/108		59	36	21	2.39353e-05	1.14483e+07	37.14
	FALSE	High	Mascot (A6)	[R].NREILEESLR.[L]		1	1	Q9WU78	Q9WU78	1	2	0.8305	0	1	1	629.842	1258.68	1.15	0.00072	2.33819e+06	HCD (High Energy Collision Dissociation)	MS2	2.23939	48.453	30.9153	9823	A001.raw	7/108		59	35	20	2.06915e-05	3.45856e+06	30.9
	FALSE	High	Mascot (A6)	[K].cSDIVFAR.[K]	C1(Carbamidomethyl)	1	1	Q9WU78	Q9WU78	0	2	1	0	1	1	484.237	967.466	-0.67	-0.00032	1.0061e+06	HCD (High Energy Collision Dissociation)	MS2	14.5082	80	32.386	10503	A001.raw	6/56		58	33	18	1.38359e-05	1.36156e+06	32.37
	FALSE	High	Mascot (A6)	[K].TMQGSEVVSVLK.[S]		1	1	Q9WU78	Q9WU78	0	2	1	0	1	1	639.342	1277.68	0.26	0.00017	6.07313e+06	HCD (High Energy Collision Dissociation)	MS2	14.012	21.445	38.5784	13504	A001.raw	10/124		58	34	19	1.8592e-05	1.59455e+07	38.56
	FALSE	High	Mascot (A6)	[K].MVPVSVQQSLAVFSQR.[K]		1	1	Q9WU78	Q9WU78	0	3	1	0	1	1	592.654	1775.95	0.19	0.00011	1.21812e+06	HCD (High Energy Collision Dissociation)	MS2	12.4834	80	55.0942	21639	A001.raw	9/156		58	35	19	1.95243e-05	3.12949e+07	55.16
	FALSE	High	Mascot (A6)	[K].NIQVSHQEFSK.[M]		1	1	Q9WU78	Q9WU78	0	2	1	0	1	1	658.833	1316.66	-0.64	-0.00042	4.2841e+06	HCD (High Energy Collision Dissociation)	MS2	4.56668	30.014	24.4811	6781	A001.raw	9/120		57	36	21	3.51116e-05	1.65062e+07	24.42
	FALSE	High	Mascot (A6)	[K].LALASLGYEK.[S]		1	1	Q9WU78	Q9WU78	0	2	0.9649	0	1	1	532.803	1064.6	0.38	0.0002	2.3215e+06	HCD (High Energy Collision Dissociation)	MS2	7.12858	38.182	40.6037	14505	A001.raw	7/72		57	33	17	1.4904e-05	8.2852e+06	40.56
	FALSE	High	Mascot (A6)	[K].NLATAYDNFVELVANLK.[E]		1	1	Q9WU78	Q9WU78	0	3	1	0	1	1	632.334	1894.99	-1.27	-0.0008	845350	HCD (High Energy Collision Dissociation)	MS2	19.0225	80	77.7804	32536	A001.raw	14/192		57	35	20	2.92374e-05	1.34257e+07	77.76
	FALSE	High	Mascot (A6)	[K].LALASLGYEK.[S]		1	1	Q9WU78	Q9WU78	0	2	0.8909	0	1	1	532.803	1064.6	0.84	0.00045	814257	HCD (High Energy Collision Dissociation)	MS2	23.8424	80	40.2505	14332	A001.raw	8/72		55	33	17	2.73717e-05	3.19545e+06	40.2
	FALSE	High	Mascot (A6)	[R].EATTLANGVLASLNLPAAIEDVSGDTVPQSILTK.[S]		1	1	Q9WU78	Q9WU78	0	3	1	0	1	1	1136.94	3408.81	0.31	0.00035	163348	HCD (High Energy Collision Dissociation)	MS2	5.32014	80	76.1864	31825	A001.raw	12/372		54	30	15	1.79163e-05	978310	76.17
	FALSE	High	Mascot (A6)	[K].TSEVDLAKPLVK.[F]		1	1	Q9WU78	Q9WU78	0	3	1	0	1	1	433.923	1299.75	1.8	0.00078	2.55898e+06	HCD (High Energy Collision Dissociation)	MS2	17.8924	32.409	33.4263	11005	A001.raw	8/104		53	32	17	3.63318e-05	1.57454e+07	33.46
	FALSE	High	Mascot (A6)	[R].LLDEEEATDNDLR.[A]		1	1	Q9WU78	Q9WU78	0	2	1	0	1	1	766.857	1532.71	-1.05	-0.00081	512667	HCD (High Energy Collision Dissociation)	MS2	60.4458	80	33.8831	11229	A001.raw	11/108		53	37	22	0.000116265	1.10639e+06	33.84
	FALSE	High	Mascot (A6)	[K].ATLVKPTPVNVPVSQK.[F]		1	1	Q9WU78	Q9WU78	0	3	1	0	1	1	560.002	1677.99	0.36	0.0002	6085641	HCD (High Energy Collision Dissociation)	MS2	0.513216	16.563	33.5455	11063	A001.raw	17/164		52	24	13	8.07572e-06	1.51323e+07	33.52
	FALSE	High	Mascot (A6)	[K].cSDIVFAR.[K]	C1(Carbamidomethyl)	1	1	Q9WU78	Q9WU78	0	2	1	0	1	1	484.236	967.466	-0.99	-0.00048	1.21346e+06	HCD (High Energy Collision Dissociation)	MS2	14.6049	47.823	32.0177	10326	A001.raw	5/56		52	36	20	0.000106741	4.40158e+06	31.99
	FALSE	High	Mascot (A6)	[R].EPSAPSIPPPAYQSSPAAGHAAAPPTPAPR.[T]		1	1	Q9WU78	Q9WU78	0	3	1	0	1	1	964.151	2890.44	-3.57	-0.00344	1115019	HCD (High Energy Collision Dissociation)	MS2	11.6247	80	37.9737	13210	A001.raw	16/300		52	37	22	0.000157164	6.76625e+06	37.98
	FALSE	High	Mascot (A6)	[R].VPDLKDLDPIGK.[A]		1	1	Q9WU78	Q9WU78	1	3	1	0	1	1	437.25	1309.74	0.13	6e-05	3.88168e+06	HCD (High Energy Collision Dissociation)	MS2	14.3867	31.948	44.7542	16525	A001.raw	10/116		51	32	17	5.0689e-05	2.42039e+07	44.83
	FALSE	High	Mascot (A6)	[K].KDNDFIYHDR.[V]		1	1	Q9WU78	Q9WU78	1	2	0.9592	0	1	1	661.811	1322.61	1.08	0.00071	143087	HCD (High Energy Collision Dissociation)	MS2	0	80	22.9367	6051	A001.raw	6/108		49	35	20	0.000147662	448848	22.93
	FALSE	High	Mascot (A6)	[R].NREILEESLR.[L]		1	1	Q9WU78	Q9WU78	1	2	0.7917	0	1	1	629.841	1258.67	-0.59	-0.00037	2258166	HCD (High Energy Collision Dissociation)	MS2	3.2461	58.185	31.2664	9984	A001.raw	12/108		48	35	20	0.000220339	7.81301e+06	31.19
	FALSE	High	Mascot (A6)	[K].NIQVSHQEFSK.[M]		1	1	Q9WU78	Q9WU78	0	2	1	0	1	1	658.833	1316.66	0.01	0	589769	HCD (High Energy Collision Dissociation)	MS2	41.9716	80	24.137	6619	A001.raw	9/120		48	36	21	0.000274042	593468	24.12
	FALSE	High	Mascot (A6)	[K].ATLVKPTPVNVPVSQK.[F]		1	1	Q9WU78	Q9WU78	0	2	1	0	1	1	839.498	1677.99	-0.28	-0.00024	2.57466e+06	HCD (High Energy Collision Dissociation)	MS2	8.74851	80	33.5326	11057	A001.raw	11/164		48	24	13	1.9417e-05	5.47057e+07	33.42
	FALSE	High	Mascot (A6)	[R].TPSNDLYKPLR.[A]		1	1	Q9WU78	Q9WU78	0	3	1	0	1	1	435.238	1303.7	0	0	3.40752e+06	HCD (High Energy Collision Dissociation)	MS2	35.8326	18.503	29.0208	8923	A001.raw	6/108		48	33	18	0.000151932	5.20593e+06	29.02
	FALSE	High	Mascot (A6)	[K].SLLSNLDEIKK.[E]		1	1	Q9WU78	Q9WU78	1	2	1	0	1	1	630.362	1259.72	-2.26	-0.00142	642414	HCD (High Energy Collision Dissociation)	MS2	0	80	43.4087	15874	A001.raw	9/104		47	33	18	0.000145039	6.15414e+06	43.44
	FALSE	High	Mascot (A6)	[K].TSEVDLAKPLVK.[F]		1	1	Q9WU78	Q9WU78	0	3	1	0	1	1	433.922	1299.75	0.6	0.00026	1.91095e+06	HCD (High Energy Collision Dissociation)	MS2	3.91847	41.974	33.774	11175	A001.raw	13/104		47	32	17	0.000146281
	FALSE	High	Mascot (A6)	[K].FTDLFEK.[M]		1	1	Q9WU78	Q9WU78	0	2	0.9149	0	1	1	450.229	899.451	0.07	3e-05	5.16629e+06	HCD (High Energy Collision Dissociation)	MS2	4.62928	16.745	39.9726	14195	A001.raw	5/48		47	30	15	8.62549e-05
	FALSE	High	Mascot (A6)	[K].FTDLFEK.[M]		1	1	Q9WU78	Q9WU78	0	2	0.9149	0	1	1	450.229	899.451	0.34	0.00015	6815288	HCD (High Energy Collision Dissociation)	MS2	5.24252	12.291	39.626	14025	A001.raw	5/48		47	30	15	9.10729e-05
	FALSE	High	Mascot (A6)	[K].SLLSNLDEIKK.[E]		1	1	Q9WU78	Q9WU78	1	3	1	0	1	1	420.578	1259.72	0.23	0.0001	6.76918e+06	HCD (High Energy Collision Dissociation)	MS2	6.02588	12.259	42.5596	15461	A001.raw	8/104		46	33	18	0.000185266	6.33348e+07	42.6
	FALSE	High	Mascot (A6)	[K].FTDLFEK.[M]		1	1	Q9WU78	Q9WU78	0	2	0.9348	0	1	1	450.229	899.451	-0.33	-0.00015	4.0485e+06	HCD (High Energy Collision Dissociation)	MS2	21.1458	20.264	39.2763	13853	A001.raw	5/48		46	30	15	0.00010809	7.01949e+06	39.25
	FALSE	High	Mascot (A6)	[K].TmQGSEVVSVLK.[S]	M2(Oxidation)	1	1	Q9WU78	Q9WU78	0	2	1	0	1	1	647.34	1293.67	0.41	0.00027	471261	HCD (High Energy Collision Dissociation)	MS2	30.0343	80	34.0958	11334	A001.raw	9/124		45	35	20	0.000374605	2.64184e+06	34.05
	FALSE	High	Mascot (A6)	[K].cSDIVFAR.[K]	C1(Carbamidomethyl)	1	1	Q9WU78	Q9WU78	0	2	1	0	1	1	484.236	967.466	-0.92	-0.00045	1.39046e+06	HCD (High Energy Collision Dissociation)	MS2	41.0513	65.306	31.6727	10169	A001.raw	6/56		45	33	18	0.000246887	1.80792e+06	31.65
	FALSE	High	Mascot (A6)	[K].NLATAYDNFVELVANLK.[E]		1	1	Q9WU78	Q9WU78	0	3	1	0	1	1	632.333	1894.99	-2.91	-0.00184	413017	HCD (High Energy Collision Dissociation)	MS2	37.9068	80	77.0911	32238	A001.raw	6/192		45	36	20	0.000468736	3.53932e+06	77.17
	FALSE	High	Mascot (A6)	[K].SLLSNLDEIKK.[E]		1	1	Q9WU78	Q9WU78	1	3	0.9556	0	1	1	420.579	1259.72	0.44	0.00019	1.76279e+06	HCD (High Energy Collision Dissociation)	MS2	24.8556	54.065	43.2312	15790	A001.raw	8/104		45	33	17	0.000235771	1.88518e+07	43.2
	FALSE	High	Mascot (A6)	[K].ATLVKPTPVNVPVSQK.[F]		1	1	Q9WU78	Q9WU78	0	3	1	0	1	1	560.002	1677.99	1.13	0.00063	2123615	HCD (High Energy Collision Dissociation)	MS2	4.92768	63.003	33.1943	10894	A001.raw	6/164		45	24	13	3.70423e-05	3.94683e+07	33.23
	FALSE	High	Mascot (A6)	[K].SVNFDMTSK.[F]		1	1	Q9WU78	Q9WU78	0	2	0.9778	0	1	1	514.741	1028.48	3.68	0.00189	2128413	HCD (High Energy Collision Dissociation)	MS2	11.1191	57.512	30.5283	9637	A001.raw	5/88		45	33	18	0.000300364
	FALSE	High	Mascot (A6)	[R].DELLKDLQQSIAR.[E]		1	1	Q9WU78	Q9WU78	1	2	1	0	1	1	764.92	1528.83	0.15	0.00012	295810	HCD (High Energy Collision Dissociation)	MS2	0	80	50.9638	19597	A001.raw	6/128		45	34	19	0.000409436	4102669	50.93
	FALSE	High	Mascot (A6)	[K].SVNFDMTSK.[F]		1	1	Q9WU78	Q9WU78	0	2	1	0	1	1	514.74	1028.47	1.31	0.00067	2.02593e+06	HCD (High Energy Collision Dissociation)	MS2	31.7812	34.867	30.8776	9804	A001.raw	5/88		44	34	19	0.000386592	9.15787e+06	30.85
	FALSE	High	Mascot (A6)	[R].NREILEESLR.[L]		1	1	Q9WU78	Q9WU78	1	2	0.7727	0	1	1	629.841	1258.68	0.57	0.00036	926500	HCD (High Energy Collision Dissociation)	MS2	10.2206	80	31.6252	10148	A001.raw	8/108		44	35	20	0.000523455	2.70654e+06	31.65
	FALSE	High	Mascot (A6)	[R].EPSAPSIPPPAYQSSPAAGHAAAPPTPAPR.[T]		1	1	Q9WU78	Q9WU78	0	3	1	0	1	1	964.153	2890.44	-1.48	-0.00143	1.12454e+06	HCD (High Energy Collision Dissociation)	MS2	0	80	37.6258	13043	A001.raw	10/300		44	37	22	0.000839403	1.52482e+07	37.72
	FALSE	High	Mascot (A6)	[K].SVNFDMTSK.[F]		1	1	Q9WU78	Q9WU78	0	2	1	0	1	1	514.742	1028.48	4.28	0.0022	1.37534e+06	HCD (High Energy Collision Dissociation)	MS2	30.4264	80	30.1773	9473	A001.raw	5/88		44	33	18	0.000395174	3.33453e+06	30.14
	FALSE	High	Mascot (A6)	[K].NIQVSHQEFSK.[M]		1	1	Q9WU78	Q9WU78	0	3	1	0	1	1	439.558	1316.66	-0.03	-1e-05	2.75986e+06	HCD (High Energy Collision Dissociation)	MS2	4.24535	25.434	24.4823	6782	A001.raw	8/120		43	36	21	0.00100883	1.50556e+07	24.42
	FALSE	High	Mascot (A6)	[K].KDNDFIYHDR.[V]		1	1	Q9WU78	Q9WU78	1	3	1	0	1	1	441.542	1322.61	-0.04	-2e-05	659678	HCD (High Energy Collision Dissociation)	MS2	15.7785	80	23.445	6286	A001.raw	7/108		42	35	20	0.000782727	1.48224e+06	23.46
	FALSE	High	Mascot (A6)	[K].VQESLKKQEGLLK.[N]		1	1	Q9WU78	Q9WU78	2	2	1	0	1	1	750.445	1499.88	2.05	0.00154	196853	HCD (High Energy Collision Dissociation)	MS2	30.5593	80	25.7398	7374	A001.raw	8/140		40	28	13	0.000322402
	FALSE	High	Mascot (A6)	[R].VPDLKDLDPIGK.[A]		1	1	Q9WU78	Q9WU78	1	3	1	0	1	1	437.249	1309.73	-1.83	-0.0008	2.28081e+06	HCD (High Energy Collision Dissociation)	MS2	7.40254	21.778	44.4113	16355	A001.raw	7/116		39	32	17	0.000805942	8.41931e+07	44.53
	FALSE	High	Mascot (A6)	[R].TPSNDLYKPLR.[A]		1	1	Q9WU78	Q9WU78	0	3	1	0	1	1	435.238	1303.7	-0.63	-0.00028	621317	HCD (High Energy Collision Dissociation)	MS2	68.4906	80	29.6172	9217	A001.raw	8/108		39	34	19	0.00139187	5.38786e+06	29.7
	FALSE	High	Mascot (A6)	[K].cSDIVFAR.[K]	C1(Carbamidomethyl)	1	1	Q9WU78	Q9WU78	0	2	0.6923	0	1	1	484.237	967.467	0.21	0.0001	261125	HCD (High Energy Collision Dissociation)	MS2	25.7837	80	32.7347	10672	A001.raw	6/56		39	33	18	0.00120784	787720	32.71
	FALSE	High	Mascot (A6)	[K].KFGEEIAR.[L]		1	1	Q9WU78	Q9WU78	1	2	0.7368	0	1	1	475.259	949.51	0.35	0.00016	516975	HCD (High Energy Collision Dissociation)	MS2	6.84492	80	22.548	5871	A001.raw	5/84		38	35	20	0.00225674	768303	22.52
	FALSE	High	Mascot (A6)	[R].DELLKDLQQSIAR.[E]		1	1	Q9WU78	Q9WU78	1	2	1	0	1	1	764.919	1528.83	-1.13	-0.00086	202656	HCD (High Energy Collision Dissociation)	MS2	0	80	50.5745	19405	A001.raw	8/128		38	34	19	0.00202677
	FALSE	High	Mascot (A6)	[R].SALGRPLDKHEGALETLLR.[Y]		1	1	Q9WU78	Q9WU78	1	3	1	0	1	1	692.723	2076.15	-1.25	-0.00087	729912	HCD (High Energy Collision Dissociation)	MS2	20.2597	80	43.8031	16056	A001.raw	15/200		37	31	16	0.00104298	7.30766e+06	43.84
	FALSE	High	Mascot (A6)	[K].TMQGSEVVSVLK.[S]		1	1	Q9WU78	Q9WU78	0	2	1	0	1	1	639.341	1277.68	-1.27	-0.00081	2.36336e+06	HCD (High Energy Collision Dissociation)	MS2	1.25021	60.422	39.2751	13852	A001.raw	10/124		37	35	20	0.00304004	4.34962e+06	39.37
	FALSE	High	Mascot (A6)	[R].TPSNDLYKPLR.[A]		1	1	Q9WU78	Q9WU78	0	2	1	0	1	1	652.356	1303.7	3.1	0.00202	568132	HCD (High Energy Collision Dissociation)	MS2	60.8694	80	29.5616	9189	A001.raw	8/108		36	33	18	0.00212042	1.90462e+06	29.53
	FALSE	High	Mascot (A6)	[R].SALGRPLDKHEGALETLLR.[Y]		1	1	Q9WU78	Q9WU78	1	4	1	0	1	1	519.794	2076.16	-0.17	-9e-05	2342828	HCD (High Energy Collision Dissociation)	MS2	27.2239	31.814	43.5783	15953	A001.raw	9/200		36	31	16	0.00143019	6.5554e+06	43.57
	FALSE	High	Mascot (A6)	[R].NREILEESLR.[L]		1	1	Q9WU78	Q9WU78	1	2	0.8056	0	1	1	629.841	1258.68	0.57	0.00036	794289	HCD (High Energy Collision Dissociation)	MS2	44.4019	80	30.5596	9652	A001.raw	5/108		36	35	20	0.00366336	4.05081e+06	30.57
	FALSE	High	Mascot (A6)	[R].SALGRPLDKHEGALETLLR.[Y]		1	1	Q9WU78	Q9WU78	1	3	1	0	1	1	692.722	2076.15	-2.66	-0.00184	638502	HCD (High Energy Collision Dissociation)	MS2	33.6876	80	43.1044	15729	A001.raw	13/200		36	31	16	0.00138858	2311004	43.1
	FALSE	High	Mascot (A6)	[R].IYGGLTSK.[V]		1	1	Q9WU78	Q9WU78	0	2	0.5429	0	1	1	419.737	838.467	-0.42	-0.00018	4466898	HCD (High Energy Collision Dissociation)	MS2	12.6822	18.872	23.7662	6440	A001.raw	6/56		35	31	16	0.0014982	8.14885e+06	23.77
	FALSE	High	Mascot (A6)	[K].EGTKFYNELTEILVR.[F]		1	1	Q9WU78	Q9WU78	1	3	1	0	1	1	604.657	1811.96	0.83	0.0005	231752	HCD (High Energy Collision Dissociation)	MS2	13.5512	80	58.8371	23498	A001.raw	7/156		35	34	19	0.00307232	5.26497e+06	58.78
	FALSE	High	Mascot (A6)	[K].ELPELLQR.[N]		1	1	Q9WU78	Q9WU78	0	2	1	0	1	1	499.288	997.568	0.06	3e-05	13649496	HCD (High Energy Collision Dissociation)	MS2	4.2874	7.102	41.298	14847	A001.raw	6/60		34	29	14	0.00147242	7.74736e+07	41.19
	FALSE	High	Mascot (A6)	[R].IYGGLTSK.[V]		1	1	Q9WU78	Q9WU78	0	2	0.6667	0	1	1	419.737	838.467	0.09	4e-05	1.80688e+06	HCD (High Energy Collision Dissociation)	MS2	36.0935	36.817	23.4224	6275	A001.raw	7/56		33	31	16	0.00266568	1.90808e+06	23.42
	FALSE	High	Mascot (A6)	[K].ELPELLQR.[N]		1	1	Q9WU78	Q9WU78	0	2	1	0	1	1	499.288	997.568	0.19	9e-05	7.71377e+06	HCD (High Energy Collision Dissociation)	MS2	3.76317	10.872	40.9482	14674	A001.raw	6/60		33	29	14	0.00203719	18776366	40.92
	FALSE	High	Mascot (A6)	[K].ATLVKPTPVNVPVSQK.[F]		1	1	Q9WU78	Q9WU78	0	2	1	0	1	1	839.499	1677.99	0.73	0.00062	254743	HCD (High Energy Collision Dissociation)	MS2	46.1065	80	33.181	10888	A001.raw	9/164		32	24	13	0.00068894
	FALSE	High	Mascot (A6)	[K].ELPELLQR.[N]		1	1	Q9WU78	Q9WU78	0	2	1	0	1	1	499.288	997.568	0.25	0.00012	2495946	HCD (High Energy Collision Dissociation)	MS2	12.7899	28.593	41.6359	15009	A001.raw	4/60		30	29	14	0.00341217
FALSE	Master Protein	Q64522	Histone H2A type 2-B OS=Mus musculus GN=Hist2h2ab PE=1 SV=3	52.3077	3	6	0	1	130	14	10.89	High		High	0	12.34	3	High	0	137	2
	Checked	Confidence	Identifying Node	Annotated Sequence	Modifications	# Protein Groups	# Proteins	Master Protein Accessions	Protein Accessions	# Missed Cleavages	Charge	DeltaScore	DeltaCn	Rank	Search Engine Rank	m/z [Da]	MH+ [Da]	DeltaM [ppm]	Deltam/z [Da]	Intensity	Activation Type	MS Order	Isolation Interference [%]	Ion Inject Time [ms]	RT [min]	First Scan	Spectrum File	Ions Matched	XCorr	Ions Score	Identity Strict	Identity Relaxed	Expectation Value	Area	Apex RT [min]
	FALSE	High	Sequest HT (A2)	[R].VGAGAPVYMAAVLEYLTAEILELAGNAAR.[D]		2	3	Q64522; Q6GSS7	Q64523; Q64522; Q6GSS7	0	3	0.8661	0	1	1	978.52	2933.55	0.85	0.00083	419389	HCD (High Energy Collision Dissociation)	MS2	9.78202	80	103.015	43134	A001.raw	0/0	7.32
	FALSE	High	Sequest HT (A2)	[R].NDEELNKLLGGVTIAQGGVLPNIQAVLLPK.[K]		1	2	Q64522	Q64522; P27661	1	3	0.8947	0	1	1	1038.59	3113.74	-4.37	-0.00454	43943.7	HCD (High Energy Collision Dissociation)	MS2	12.0655	80	71.7524	29724	A001.raw	0/0	2.85					1.63712e+06	71.82
	FALSE	High	Sequest HT (A2)	[R].AGLQFPVGR.[VI]		3	12	Q64522; C0HKE4; Q6GSS7	Q64523; Q8BFU2; Q3THW5; Q64522; C0HKE4; P0C0S6; Q8CGP5; Q8R1M2; P27661; Q8CGP7; Q8CGP6; Q6GSS7	0	2	0.5945	0	1	1	472.77	944.532	1.3	0.00062	12228752	HCD (High Energy Collision Dissociation)	MS2	8.27079	8	39.2533	13840	A001.raw	0/0	2.17					5.44757e+07	39.19
	FALSE	High	Mascot (A6)	[R].VGAGAPVYMAAVLEYLTAEILELAGNAAR.[D]		2	4	Q64522; Q6GSS7	Q64523; Q64522; F8WIX8; Q6GSS7	0	3	1	0	1	1	978.52	2933.55	0.85	0.00083	419389	HCD (High Energy Collision Dissociation)	MS2	9.78202	80	103.015	43134	A001.raw	14/236		85	32	17	2.1391e-08
	FALSE	High	Mascot (A6)	[R].AGLQFPVGR.[VI]		3	16	Q64522; C0HKE4; Q6GSS7	Q64523; Q8BFU2; Q3THW5; Q64522; C0HKE4; P0C0S6; Q8CGP5; Q8CGP4; Q8R1M2; P27661; Q3UA95; Q8CGP7; F8WIX8; G3UWL7; Q8CGP6; Q6GSS7	0	2	0.7447	0	1	1	472.769	944.531	-0.12	-6e-05	18790996	HCD (High Energy Collision Dissociation)	MS2	1.49531	5.434	38.8962	13661	A001.raw	7/84		47	36	21	0.000311393	2.97595e+07	38.85
	FALSE	High	Mascot (A6)	[R].AGLQFPVGR.[VI]		3	16	Q64522; C0HKE4; Q6GSS7	Q64523; Q8BFU2; Q3THW5; Q64522; C0HKE4; P0C0S6; Q8CGP5; Q8CGP4; Q8R1M2; P27661; Q3UA95; Q8CGP7; F8WIX8; G3UWL7; Q8CGP6; Q6GSS7	0	2	0.8919	0	1	1	472.77	944.532	1.3	0.00062	12228752	HCD (High Energy Collision Dissociation)	MS2	8.27079	8	39.2533	13840	A001.raw	6/84		37	32	17	0.00130996	5.44757e+07	39.19
FALSE	Master Protein	P07356	Annexin A2 OS=Mus musculus OX=10090 GN=Anxa2 PE=1 SV=2	50.4425	16	72	0	1	339	38.7	7.69	High		High	0	132.89	13	High	0	1883	16
	Checked	Confidence	Identifying Node	Annotated Sequence	Modifications	# Protein Groups	# Proteins	Master Protein Accessions	Protein Accessions	# Missed Cleavages	Charge	DeltaScore	DeltaCn	Rank	Search Engine Rank	m/z [Da]	MH+ [Da]	DeltaM [ppm]	Deltam/z [Da]	Intensity	Activation Type	MS Order	Isolation Interference [%]	Ion Inject Time [ms]	RT [min]	First Scan	Spectrum File	Ions Matched	XCorr	Ions Score	Identity Strict	Identity Relaxed	Expectation Value	Area	Apex RT [min]
	FALSE	High	Sequest HT (A2)	[K].GDLENAFLNLVQcIQNKPLYFADR.[L]	C13(Carbamidomethyl)	1	1	P07356	P07356	0	3	0.798	0	1	1	946.814	2838.43	0.61	0.00058	339093	HCD (High Energy Collision Dissociation)	MS2	4.6485	80	76.6416	32038	A001.raw	0/0	5.94					9.6216e+06	76.64
	FALSE	High	Sequest HT (A2)	[R].RAEDGSVIDYELIDQDAR.[E-]		1	1	P07356	P07356	1	3	0.75	0	1	1	688.999	2064.98	-0.27	-0.00018	1.36521e+06	HCD (High Energy Collision Dissociation)	MS2	12.758	80	44.2015	16251	A001.raw	0/0	5.56					1.0165e+07	44.23
	FALSE	High	Sequest HT (A2)	[R].RAEDGSVIDYELIDQDAR.[E-]		1	1	P07356	P07356	1	3	0.6896	0	1	1	688.998	2064.98	-1.24	-0.00086	1.26934e+06	HCD (High Energy Collision Dissociation)	MS2	35.7615	80	43.8268	16068	A001.raw	0/0	5.38					8.82122e+06	43.85
	FALSE	High	Sequest HT (A2)	[K].GLGTDEDSLIEIIcSR.[T]	C14(Carbamidomethyl)	1	1	P07356	P07356	0	2	0.7746	0	1	1	889.434	1777.86	-1.69	-0.00151	1316967	HCD (High Energy Collision Dissociation)	MS2	12.95	80	60.229	24181	A001.raw	0/0	4.97					4.97201e+06	60.25
	FALSE	High	Sequest HT (A2)	[K].GLGTDEDSLIEIIcSR.[T]	C14(Carbamidomethyl)	1	1	P07356	P07356	0	2	0.7669	0	1	1	889.434	1777.86	-1.83	-0.00163	2.45695e+06	HCD (High Energy Collision Dissociation)	MS2	13.0181	80	59.8743	24006	A001.raw	0/0	4.89					1.50797e+07	59.8
	FALSE	High	Sequest HT (A2)	[K].SALSGHLETVILGLLK.[T]		1	1	P07356	P07356	0	2	0.7926	0	1	1	825.993	1650.98	0.47	0.00039	724326	HCD (High Energy Collision Dissociation)	MS2	1.91245	80	68.5932	28214	A001.raw	0/0	4.58					2.3293e+07	68.42
	FALSE	High	Sequest HT (A2)	[R].AEDGSVIDYELIDQDAR.[E-]		1	1	P07356	P07356	0	2	0.8057	0	1	1	954.946	1908.89	1.53	0.00146	440685	HCD (High Energy Collision Dissociation)	MS2	0	80	47.6871	17989	A001.raw	0/0	4.53					3.13112e+06	47.6
	FALSE	High	Sequest HT (A2)	[K].SALSGHLETVILGLLK.[T]		1	1	P07356	P07356	0	2	0.8041	0	1	1	825.993	1650.98	-0.27	-0.00022	171924	HCD (High Energy Collision Dissociation)	MS2	0	80	69.2888	28547	A001.raw	0/0	4.44					2.75772e+06	69.18
	FALSE	High	Sequest HT (A2)	[K].GVDEVTIVNILTNR.[S]		1	1	P07356	P07356	0	2	0.7959	0	1	1	771.927	1542.85	-0.97	-0.00075	1.61197e+06	HCD (High Energy Collision Dissociation)	MS2	22.1098	80	59.1932	23673	A001.raw	0/0	4.36					2.10812e+07	59.1
	FALSE	High	Sequest HT (A2)	[K].EVKGDLENAFLNLVQcIQNKPLYFADR.[L]	C16(Carbamidomethyl)	1	1	P07356	P07356	1	4	0.6752	0	1	1	799.415	3194.64	2.44	0.00195	98061.8	HCD (High Energy Collision Dissociation)	MS2	0	80	73.0674	30348	A001.raw	0/0	4.31					2.55533e+06	72.97
	FALSE	High	Sequest HT (A2)	[K].SALSGHLETVILGLLK.[T]		1	1	P07356	P07356	0	3	0.8478	0	1	1	550.998	1650.98	0.09	5e-05	2243672	HCD (High Energy Collision Dissociation)	MS2	8.03173	80	68.8692	28346	A001.raw	0/0	4.27					5.30541e+06	68.72
	FALSE	High	Sequest HT (A2)	[K].SALSGHLETVILGLLK.[T]		1	1	P07356	P07356	0	2	0.7658	0	1	1	825.994	1650.98	0.69	0.00057	213716	HCD (High Energy Collision Dissociation)	MS2	24.3768	80	68.2314	28041	A001.raw	0/0	4.27					1.63437e+07	68.34
	FALSE	High	Sequest HT (A2)	[K].GDLENAFLNLVQcIQNKPLYFADR.[L]	C13(Carbamidomethyl)	1	1	P07356	P07356	0	3	0.7418	0	1	1	946.81	2838.41	-3.45	-0.00327	246251	HCD (High Energy Collision Dissociation)	MS2	1.80615	80	76.2894	31873	A001.raw	0/0	4.26					2.85071e+06	76.31
	FALSE	High	Sequest HT (A2)	[K].SALSGHLETVILGLLK.[T]		1	1	P07356	P07356	0	2	0.7788	0	1	1	825.993	1650.98	0.1	8e-05	465938	HCD (High Energy Collision Dissociation)	MS2	6.96166	80	68.9399	28380	A001.raw	0/0	4.25					1.06868e+06	68.93
	FALSE	High	Sequest HT (A2)	[K].GLGTDEDSLIEIIcSR.[T]	C14(Carbamidomethyl)	1	1	P07356	P07356	0	2	0.7943	0	1	1	889.432	1777.86	-3.82	-0.0034	505507	HCD (High Energy Collision Dissociation)	MS2	31.7111	80	59.4717	23810	A001.raw	0/0	4.18
	FALSE	High	Sequest HT (A2)	[K].SALSGHLETVILGLLK.[T]		1	1	P07356	P07356	0	3	0.837	0	1	1	550.998	1650.98	1.2	0.00066	4447649	HCD (High Energy Collision Dissociation)	MS2	3.25844	80	68.5242	28181	A001.raw	0/0	4.11					8.79609e+07	68.34
	FALSE	High	Sequest HT (A2)	[K].TKGVDEVTIVNILTNR.[S]		1	1	P07356	P07356	1	2	0.7857	0	1	1	886.498	1771.99	-1.02	-0.00091	312828	HCD (High Energy Collision Dissociation)	MS2	0	80	53.6462	20920	A001.raw	0/0	4.06					2734549	53.6
	FALSE	High	Sequest HT (A2)	[K].TKGVDEVTIVNILTNR.[S]		1	1	P07356	P07356	1	3	0.7552	0	1	1	591.335	1771.99	0.31	0.00019	2.1911e+06	HCD (High Energy Collision Dissociation)	MS2	45.8068	38.508	53.9196	21056	A001.raw	0/0	3.84					1.86717e+07	53.9
	FALSE	High	Sequest HT (A2)	[R].RAEDGSVIDYELIDQDAR.[E-]		1	1	P07356	P07356	1	2	0.6766	0	1	1	1032.99	2064.98	-1.44	-0.00149	580803	HCD (High Energy Collision Dissociation)	MS2	0	80	44.0994	16200	A001.raw	0/0	3.68					5.58822e+06	44.11
	FALSE	High	Sequest HT (A2)	[K].GLGTDEDSLIEIIcSR.[T]	C14(Carbamidomethyl)	1	1	P07356	P07356	0	2	0.7108	0	1	1	889.435	1777.86	-0.6	-0.00053	411946	HCD (High Energy Collision Dissociation)	MS2	23.1379	80	59.2923	23722	A001.raw	0/0	3.32					1.40684e+06	59.28
	FALSE	High	Sequest HT (A2)	[R].AEDGSVIDYELIDQDAR.[E-]		1	1	P07356	P07356	0	2	0.7706	0	1	1	954.948	1908.89	3.7	0.00353	344750	HCD (High Energy Collision Dissociation)	MS2	0	80	48.0713	18178	A001.raw	0/0	3.27
	FALSE	High	Sequest HT (A2)	[K].SALSGHLETVILGLLK.[T]		1	1	P07356	P07356	0	3	0.7975	0	1	1	550.998	1650.98	-0.46	-0.00025	517924	HCD (High Energy Collision Dissociation)	MS2	19.7803	80	69.5579	28676	A001.raw	0/0	3.26					2.16246e+06	69.49
	FALSE	High	Sequest HT (A2)	[K].EVKGDLENAFLNLVQcIQNKPLYFADR.[L]	C16(Carbamidomethyl)	1	1	P07356	P07356	1	3	0.6211	0	1	1	1065.55	3194.63	1.43	0.00152	77808.8	HCD (High Energy Collision Dissociation)	MS2	4.98128	80	72.793	30218	A001.raw	0/0	3.22					5.9412e+06	72.88
	FALSE	High	Sequest HT (A2)	[K].SALSGHLETVILGLLK.[T]		1	1	P07356	P07356	0	3	0.8459	0	1	1	550.999	1650.98	1.31	0.00072	898767	HCD (High Energy Collision Dissociation)	MS2	9.15429	80	69.2144	28511	A001.raw	0/0	3.18					2.27454e+06	69.18
	FALSE	High	Sequest HT (A2)	[R].QDIAFAYQR.[R]		1	1	P07356	P07356	0	2	0.6804	0	1	1	556.279	1111.55	-1.92	-0.00107	2.22275e+06	HCD (High Energy Collision Dissociation)	MS2	0	50.744	34.6887	11624	A001.raw	0/0	3.16					8.08133e+06	34.64
	FALSE	High	Sequest HT (A2)	[K].TPAQYDASELK.[A]		1	1	P07356	P07356	0	2	0.6611	0	1	1	611.8	1222.59	-1.49	-0.00091	1.05451e+06	HCD (High Energy Collision Dissociation)	MS2	3.65192	80	26.6273	7796	A001.raw	0/0	3.01					3.19129e+06	26.66
	FALSE	High	Sequest HT (A2)	[K].TKGVDEVTIVNILTNR.[S]		1	1	P07356	P07356	1	3	0.7603	0	1	1	591.334	1771.99	-1.55	-0.00091	577304	HCD (High Energy Collision Dissociation)	MS2	36.1434	80	54.278	21232	A001.raw	0/0	2.92					8.66386e+06	54.19
	FALSE	High	Sequest HT (A2)	[K].SYSPYDMLESIKK.[E]		1	1	P07356	P07356	1	3	0.7869	0	1	1	520.926	1560.76	0.88	0.00046	687636	HCD (High Energy Collision Dissociation)	MS2	7.01842	80	48.5973	18436	A001.raw	0/0	2.91					4.31051e+06	48.61
	FALSE	High	Sequest HT (A2)	[K].SYSPYDMLESIKK.[E]		1	1	P07356	P07356	1	3	0.7973	0	1	1	520.925	1560.76	-1.12	-0.00058	420161	HCD (High Energy Collision Dissociation)	MS2	31.3056	80	48.2438	18262	A001.raw	0/0	2.91					1.70626e+06	48.23
	FALSE	High	Sequest HT (A2)	[K].TPAQYDASELK.[A]		1	1	P07356	P07356	0	2	0.7188	0	1	1	611.802	1222.6	1.81	0.0011	1.01923e+06	HCD (High Energy Collision Dissociation)	MS2	4.54573	80	26.9863	7962	A001.raw	0/0	2.88					4.50603e+06	26.96
	FALSE	High	Sequest HT (A2)	[K].EVKGDLENAFLNLVQcIQNKPLYFADR.[L]	C16(Carbamidomethyl)	1	1	P07356	P07356	1	3	0.6439	0	1	1	1065.54	3194.62	-3.39	-0.0036	104559	HCD (High Energy Collision Dissociation)	MS2	49.9754	80	73.1622	30393	A001.raw	0/0	2.78					1.56829e+06	73.12
	FALSE	High	Sequest HT (A2)	[R].QDIAFAYQR.[R]		1	1	P07356	P07356	0	2	0.69	0	1	1	556.281	1111.55	1.05	0.00058	1088689	HCD (High Energy Collision Dissociation)	MS2	39.7886	35.229	34.3379	11450	A001.raw	0/0	2.71					7.82797e+06	34.34
	FALSE	High	Sequest HT (A2)	[K].SLYYYIQQDTK.[G]		1	1	P07356	P07356	0	2	0.5833	0	1	1	711.349	1421.69	-2.3	-0.00163	745035	HCD (High Energy Collision Dissociation)	MS2	4.50046	80	42.3897	15377	A001.raw	0/0	2.64
	FALSE	High	Sequest HT (A2)	[R].QDIAFAYQR.[R]		1	1	P07356	P07356	0	2	0.6388	0	1	1	556.28	1111.55	-0.49	-0.00027	988156	HCD (High Energy Collision Dissociation)	MS2	19.4854	80	35.0305	11791	A001.raw	0/0	2.63					2.31903e+06	34.96
	FALSE	High	Sequest HT (A2)	[K].WISIMTER.[S]		1	1	P07356	P07356	0	2	0.5202	0	1	1	518.268	1035.53	0.4	0.00021	3.36368e+06	HCD (High Energy Collision Dissociation)	MS2	31.2723	37.116	44.5404	16419	A001.raw	0/0	2.23					1.84098e+07	44.55
	FALSE	High	Mascot (A6)	[K].GLGTDEDSLIEIIcSR.[T]	C14(Carbamidomethyl)	1	3	P07356	B0V2N8; B0V2N7; P07356	0	2	0.9917	0	1	1	889.434	1777.86	-1.83	-0.00163	2.45695e+06	HCD (High Energy Collision Dissociation)	MS2	13.0181	80	59.8743	24006	A001.raw	12/120		121	37	22	1.65738e-11	1.50797e+07	59.8
	FALSE	High	Mascot (A6)	[K].GLGTDEDSLIEIIcSR.[T]	C14(Carbamidomethyl)	1	3	P07356	B0V2N8; B0V2N7; P07356	0	2	0.9917	0	1	1	889.434	1777.86	-1.69	-0.00151	1316967	HCD (High Energy Collision Dissociation)	MS2	12.95	80	60.229	24181	A001.raw	12/120		121	37	22	1.85107e-11	4.97201e+06	60.25
	FALSE	High	Mascot (A6)	[K].SALSGHLETVILGLLK.[T]		1	3	P07356	B0V2N8; B0V2N7; P07356	0	2	1	0	1	1	825.993	1650.98	0.1	8e-05	465938	HCD (High Energy Collision Dissociation)	MS2	6.96166	80	68.9399	28380	A001.raw	24/120		96	25	13	3.20721e-10	1.06868e+06	68.93
	FALSE	High	Mascot (A6)	[K].SALSGHLETVILGLLK.[T]		1	3	P07356	B0V2N8; B0V2N7; P07356	0	2	1	0	1	1	825.993	1650.98	0.47	0.00039	724326	HCD (High Energy Collision Dissociation)	MS2	1.91245	80	68.5932	28214	A001.raw	12/120		96	25	13	3.85592e-10	2.3293e+07	68.42
	FALSE	High	Mascot (A6)	[K].SALSGHLETVILGLLK.[T]		1	3	P07356	B0V2N8; B0V2N7; P07356	0	2	1	0	1	1	825.994	1650.98	0.69	0.00057	213716	HCD (High Energy Collision Dissociation)	MS2	24.3768	80	68.2314	28041	A001.raw	14/120		91	25	13	1.13273e-09	1.63437e+07	68.34
	FALSE	High	Mascot (A6)	[K].GLGTDEDSLIEIIcSR.[T]	C14(Carbamidomethyl)	1	3	P07356	B0V2N8; B0V2N7; P07356	0	2	0.9886	0	1	1	889.435	1777.86	-0.6	-0.00053	411946	HCD (High Energy Collision Dissociation)	MS2	23.1379	80	59.2923	23722	A001.raw	10/120		88	37	22	3.64287e-08	1.40684e+06	59.28
	FALSE	High	Mascot (A6)	[R].RAEDGSVIDYELIDQDAR.[E-]		1	3	P07356	B0V2N5; B0V2N7; P07356	1	2	1	0	1	1	1032.99	2064.98	-1.44	-0.00149	580803	HCD (High Energy Collision Dissociation)	MS2	0	80	44.0994	16200	A001.raw	15/204		87	38	23	5.58985e-08	5.58822e+06	44.11
	FALSE	High	Mascot (A6)	[R].AEDGSVIDYELIDQDAR.[E-]		1	3	P07356	B0V2N5; B0V2N7; P07356	0	2	1	0	1	1	954.946	1908.89	1.53	0.00146	440685	HCD (High Energy Collision Dissociation)	MS2	0	80	47.6871	17989	A001.raw	15/140		84	38	23	9.60063e-08	3.13112e+06	47.6
	FALSE	High	Mascot (A6)	[K].SALSGHLETVILGLLK.[T]		1	3	P07356	B0V2N8; B0V2N7; P07356	0	2	1	0	1	1	825.993	1650.98	-0.27	-0.00022	171924	HCD (High Energy Collision Dissociation)	MS2	0	80	69.2888	28547	A001.raw	16/120		82	25	13	1.04014e-08	2.75772e+06	69.18
	FALSE	High	Mascot (A6)	[K].GVDEVTIVNILTNR.[S]		1	3	P07356	B0V2N8; B0V2N7; P07356	0	2	1	0	1	1	771.927	1542.85	-0.97	-0.00075	1.61197e+06	HCD (High Energy Collision Dissociation)	MS2	22.1098	80	59.1932	23673	A001.raw	9/124		81	34	19	8.22905e-08	2.10812e+07	59.1
	FALSE	High	Mascot (A6)	[K].TKGVDEVTIVNILTNR.[S]		1	3	P07356	B0V2N8; B0V2N7; P07356	1	2	1	0	1	1	886.498	1771.99	-1.02	-0.00091	312828	HCD (High Energy Collision Dissociation)	MS2	0	80	53.6462	20920	A001.raw	13/176		78	33	18	1.24477e-07	2734549	53.6
	FALSE	High	Mascot (A6)	[K].GDLENAFLNLVQcIQNKPLYFADR.[L]	C13(Carbamidomethyl)	1	2	P07356	B0V2N5; P07356	0	3	1	0	1	1	946.814	2838.43	0.61	0.00058	339093	HCD (High Energy Collision Dissociation)	MS2	4.6485	80	76.6416	32038	A001.raw	10/260		76	36	21	4.61825e-07	9.6216e+06	76.64
	FALSE	High	Mascot (A6)	[R].RAEDGSVIDYELIDQDAR.[E-]		1	3	P07356	B0V2N5; B0V2N7; P07356	1	3	1	0	1	1	688.999	2064.98	-0.27	-0.00018	1.36521e+06	HCD (High Energy Collision Dissociation)	MS2	12.758	80	44.2015	16251	A001.raw	16/204		76	38	23	7.34623e-07	1.0165e+07	44.23
	FALSE	High	Mascot (A6)	[R].AEDGSVIDYELIDQDAR.[E-]		1	3	P07356	B0V2N5; B0V2N7; P07356	0	2	1	0	1	1	954.948	1908.89	3.7	0.00353	344750	HCD (High Energy Collision Dissociation)	MS2	0	80	48.0713	18178	A001.raw	12/140		71	38	22	1.78717e-06
	FALSE	High	Mascot (A6)	[R].RAEDGSVIDYELIDQDAR.[E-]		1	3	P07356	B0V2N5; B0V2N7; P07356	1	3	1	0	1	1	688.998	2064.98	-1.24	-0.00086	1.26934e+06	HCD (High Energy Collision Dissociation)	MS2	35.7615	80	43.8268	16068	A001.raw	16/204		67	38	23	4.57655e-06	8.82122e+06	43.85
	FALSE	High	Mascot (A6)	[K].SALSGHLETVILGLLK.[T]		1	3	P07356	B0V2N8; B0V2N7; P07356	0	3	1	0	1	1	550.998	1650.98	1.2	0.00066	4447649	HCD (High Energy Collision Dissociation)	MS2	3.25844	80	68.5242	28181	A001.raw	11/120		66	25	13	3.02652e-07	8.79609e+07	68.34
	FALSE	High	Mascot (A6)	[K].SALSGHLETVILGLLK.[T]		1	3	P07356	B0V2N8; B0V2N7; P07356	0	3	1	0	1	1	550.999	1650.98	1.31	0.00072	898767	HCD (High Energy Collision Dissociation)	MS2	9.15429	80	69.2144	28511	A001.raw	10/120		66	25	13	3.60532e-07	2.27454e+06	69.18
	FALSE	High	Mascot (A6)	[K].TPAQYDASELK.[A]		1	3	P07356	B0V2N8; B0V2N7; P07356	0	2	1	0	1	1	611.802	1222.6	1.81	0.0011	1.01923e+06	HCD (High Energy Collision Dissociation)	MS2	4.54573	80	26.9863	7962	A001.raw	9/108		65	36	21	5.27855e-06	4.50603e+06	26.96
	FALSE	High	Mascot (A6)	[K].GDLENAFLNLVQcIQNKPLYFADR.[L]	C13(Carbamidomethyl)	1	2	P07356	B0V2N5; P07356	0	3	1	0	1	1	946.81	2838.41	-3.45	-0.00327	246251	HCD (High Energy Collision Dissociation)	MS2	1.80615	80	76.2894	31873	A001.raw	24/260		64	37	22	9.13945e-06	2.85071e+06	76.31
	FALSE	High	Mascot (A6)	[K].GLGTDEDSLIEIIcSR.[T]	C14(Carbamidomethyl)	1	3	P07356	B0V2N8; B0V2N7; P07356	0	2	1	0	1	1	889.432	1777.86	-3.82	-0.0034	505507	HCD (High Energy Collision Dissociation)	MS2	31.7111	80	59.4717	23810	A001.raw	12/120		63	37	22	1.16008e-05
	FALSE	High	Mascot (A6)	[K].SALSGHLETVILGLLK.[T]		1	3	P07356	B0V2N8; B0V2N7; P07356	0	3	1	0	1	1	550.998	1650.98	0.09	5e-05	2243672	HCD (High Energy Collision Dissociation)	MS2	8.03173	80	68.8692	28346	A001.raw	11/120		61	25	13	1.08925e-06	5.30541e+06	68.72
	FALSE	High	Mascot (A6)	[R].TNQELQEINR.[V]		1	4	P07356	B0V2N8; B0V2N5; B0V2N7; P07356	0	2	1	0	1	1	622.815	1244.62	-0.08	-5e-05	435754	HCD (High Energy Collision Dissociation)	MS2	3.14382	80	25.6289	7319	A001.raw	8/104		55	35	20	4.31834e-05	1.4638e+06	25.66
	FALSE	High	Mascot (A6)	[K].SALSGHLETVILGLLK.[T]		1	3	P07356	B0V2N8; B0V2N7; P07356	0	3	1	0	1	1	550.998	1650.98	-0.46	-0.00025	517924	HCD (High Energy Collision Dissociation)	MS2	19.7803	80	69.5579	28676	A001.raw	7/120		52	25	13	8.89388e-06	2.16246e+06	69.49
	FALSE	High	Mascot (A6)	[K].TPAQYDASELK.[A]		1	3	P07356	B0V2N8; B0V2N7; P07356	0	2	0.9615	0	1	1	611.8	1222.59	-1.49	-0.00091	1.05451e+06	HCD (High Energy Collision Dissociation)	MS2	3.65192	80	26.6273	7796	A001.raw	7/108		52	36	21	0.000109814	3.19129e+06	26.66
	FALSE	High	Mascot (A6)	[R].QDIAFAYQR.[R]		1	3	P07356	B0V2N8; B0V2N7; P07356	0	2	0.8	0	1	1	556.279	1111.55	-1.92	-0.00107	2.22275e+06	HCD (High Energy Collision Dissociation)	MS2	0	50.744	34.6887	11624	A001.raw	7/96		50	35	20	0.000168475	8.08133e+06	34.64
	FALSE	High	Mascot (A6)	[K].LMVALAK.[-G]		1	4	P07356	B0V2N8; B0V2N5; B0V2N7; P07356	0	2	1	0	1	1	373.236	745.464	0.38	0.00014	3.3369e+06	HCD (High Energy Collision Dissociation)	MS2	17.6428	24.32	32.8884	10747	A001.raw	6/48		46	29	14	9.86798e-05	1.38684e+07	32.84
	FALSE	High	Mascot (A6)	[R].TNQELQEINR.[V]		1	4	P07356	B0V2N8; B0V2N5; B0V2N7; P07356	0	2	0.9778	0	1	1	622.815	1244.62	-0.18	-0.00011	387965	HCD (High Energy Collision Dissociation)	MS2	0	80	25.2844	7161	A001.raw	8/104		45	35	20	0.000492399	1.76295e+06	25.27
	FALSE	High	Mascot (A6)	[K].SYSPYDMLESIKK.[E]		1	2	P07356	B0V2N5; P07356	1	3	1	0	1	1	520.925	1560.76	-1.12	-0.00058	420161	HCD (High Energy Collision Dissociation)	MS2	31.3056	80	48.2438	18262	A001.raw	6/100		42	36	21	0.00102328	1.70626e+06	48.23
	FALSE	High	Mascot (A6)	[K].LMVALAK.[-G]		1	4	P07356	B0V2N8; B0V2N5; B0V2N7; P07356	0	2	1	0	1	1	373.236	745.464	0.38	0.00014	1172298	HCD (High Energy Collision Dissociation)	MS2	38.4942	73.488	32.5368	10577	A001.raw	6/48		42	29	14	0.000230796	1.73653e+06	32.5
	FALSE	High	Mascot (A6)	[K].LMVALAK.[-G]		1	4	P07356	B0V2N8; B0V2N5; B0V2N7; P07356	0	2	1	0	1	1	373.236	745.465	0.79	0.00029	2.9383e+06	HCD (High Energy Collision Dissociation)	MS2	21.5137	41.237	33.2923	10940	A001.raw	6/48		41	28	13	0.000209974	1.38453e+07	33.23
	FALSE	High	Mascot (A6)	[K].SLYYYIQQDTK.[G]		1	2	P07356	B0V2N5; P07356	0	2	1	0	1	1	711.349	1421.69	-2.3	-0.00163	745035	HCD (High Energy Collision Dissociation)	MS2	4.50046	80	42.3897	15377	A001.raw	6/96		40	36	20	0.00162709
	FALSE	High	Mascot (A6)	[K].WISIMTER.[S]		1	2	P07356	B0V2N5; P07356	0	2	0.7692	0	1	1	518.268	1035.53	0.4	0.00021	3.36368e+06	HCD (High Energy Collision Dissociation)	MS2	31.2723	37.116	44.5404	16419	A001.raw	6/56		39	36	21	0.00226388	1.84098e+07	44.55
	FALSE	High	Mascot (A6)	[K].TKGVDEVTIVNILTNR.[S]		1	3	P07356	B0V2N8; B0V2N7; P07356	1	3	1	0	1	1	591.335	1771.99	0.31	0.00019	2.1911e+06	HCD (High Energy Collision Dissociation)	MS2	45.8068	38.508	53.9196	21056	A001.raw	15/176		38	33	18	0.0013397	1.86717e+07	53.9
	FALSE	High	Mascot (A6)	[K].EVKGDLENAFLNLVQcIQNKPLYFADR.[L]	C16(Carbamidomethyl)	1	2	P07356	B0V2N5; P07356	1	3	1	0	1	1	1065.55	3194.63	1.43	0.00152	77808.8	HCD (High Energy Collision Dissociation)	MS2	4.98128	80	72.793	30218	A001.raw	8/304		37	35	19	0.0023702	5.9412e+06	72.88
	FALSE	High	Mascot (A6)	[R].ELYDAGVKR.[K]		1	2	P07356	B0V2N5; P07356	1	2	0.9459	0	1	1	525.783	1050.56	0.42	0.00022	489679	HCD (High Energy Collision Dissociation)	MS2	24.0803	80	22.1365	5684	A001.raw	6/68		37	35	20	0.00311055	619199	22.07
	FALSE	High	Mascot (A6)	[K].TKGVDEVTIVNILTNR.[S]		1	3	P07356	B0V2N8; B0V2N7; P07356	1	3	1	0	1	1	591.334	1771.99	-1.55	-0.00091	577304	HCD (High Energy Collision Dissociation)	MS2	36.1434	80	54.278	21232	A001.raw	14/176		34	33	18	0.00366545	8.66386e+06	54.19
	FALSE	High	Mascot (A6)	[K].SALSGHLETVILGLLK.[T]		1	3	P07356	B0V2N8; B0V2N7; P07356	0	3	1	0	1	1	550.998	1650.98	0.98	0.00054	124707	HCD (High Energy Collision Dissociation)	MS2	44.6661	80	68.1606	28007	A001.raw	6/120		31	25	13	0.00103307
FALSE	Master Protein	P97429	Annexin A4 OS=Mus musculus GN=Anxa4 PE=2 SV=4	47.6489	14	68	0	1	319	35.9	5.57	High		High	0	118.62	13	High	0	2086	14
	Checked	Confidence	Identifying Node	Annotated Sequence	Modifications	# Protein Groups	# Proteins	Master Protein Accessions	Protein Accessions	# Missed Cleavages	Charge	DeltaScore	DeltaCn	Rank	Search Engine Rank	m/z [Da]	MH+ [Da]	DeltaM [ppm]	Deltam/z [Da]	Intensity	Activation Type	MS Order	Isolation Interference [%]	Ion Inject Time [ms]	RT [min]	First Scan	Spectrum File	Ions Matched	XCorr	Ions Score	Identity Strict	Identity Relaxed	Expectation Value	Area	Apex RT [min]
	FALSE	High	Sequest HT (A2)	[R].DLIEDLKSELSSNFEQVILGLMTPTVLYDVQELRR.[A]		1	1	P97429	P97429	2	4	0.8667	0	1	1	1016.79	4064.14	2.43	0.00247	234599	HCD (High Energy Collision Dissociation)	MS2	37.3998	80	96.7426	40493	A001.raw	0/0	5.4					6671004	96.78
	FALSE	High	Sequest HT (A2)	[K].GAGTDEGcLIEILASR.[T]	C8(Carbamidomethyl)	1	1	P97429	P97429	0	2	0.7714	0	1	1	831.412	1661.82	-0.35	-0.00029	3.73278e+06	HCD (High Energy Collision Dissociation)	MS2	10.9489	36.022	56.4058	22296	A001.raw	0/0	5.25					4.26853e+07	56.29
	FALSE	High	Sequest HT (A2)	[K].GLGTDEDAIIGILAYR.[N]		1	1	P97429	P97429	0	2	0.7773	0	1	1	838.946	1676.88	-0.26	-0.00022	2.7525e+06	HCD (High Energy Collision Dissociation)	MS2	2.54728	80	63.0704	25560	A001.raw	0/0	4.94					5794098	63.08
	FALSE	High	Sequest HT (A2)	[K].GAGTDEGcLIEILASR.[T]	C8(Carbamidomethyl)	1	1	P97429	P97429	0	2	0.7918	0	1	1	831.413	1661.82	1.26	0.00105	1.72153e+06	HCD (High Energy Collision Dissociation)	MS2	41.7574	53.643	56.7577	22472	A001.raw	0/0	4.85
	FALSE	High	Sequest HT (A2)	[K-].AASGFNATEDAQTLRK.[A]		1	1	P97429	P97429	1	3	0.7796	0	1	1	560.617	1679.84	1.03	0.00057	987541	HCD (High Energy Collision Dissociation)	MS2	15.5305	80	28.676	8756	A001.raw	0/0	4.81					1.5066e+06	28.66
	FALSE	High	Sequest HT (A2)	[K].GLGTDEDAIIGILAYR.[N]		1	1	P97429	P97429	0	2	0.7845	0	1	1	838.946	1676.88	-0.41	-0.00034	3.96249e+06	HCD (High Energy Collision Dissociation)	MS2	1.64014	42.937	63.4108	25724	A001.raw	0/0	4.78					2.44364e+07	63.38
	FALSE	High	Sequest HT (A2)	[K-].AASGFNATEDAQTLR.[K]		1	1	P97429	P97429	0	2	0.7458	0	1	1	776.373	1551.74	-0.77	-0.0006	1972209	HCD (High Energy Collision Dissociation)	MS2	3.86294	74.121	32.9111	10758	A001.raw	0/0	4.76					4.95744e+06	32.91
	FALSE	High	Sequest HT (A2)	[K].GLGTDEDAIIGILAYR.[N]		1	1	P97429	P97429	0	2	0.7694	0	1	1	838.946	1676.88	-0.55	-0.00046	1.82412e+06	HCD (High Energy Collision Dissociation)	MS2	0	68.775	63.7543	25890	A001.raw	0/0	4.64					7.11461e+06	63.68
	FALSE	High	Sequest HT (A2)	[K].GAGTDEGcLIEILASR.[T]	C8(Carbamidomethyl)	1	1	P97429	P97429	0	2	0.7605	0	1	1	831.411	1661.81	-1.16	-0.00097	2.9679e+06	HCD (High Energy Collision Dissociation)	MS2	38.9194	51.787	56.0594	22122	A001.raw	0/0	4.3					6.94616e+06	56.02
	FALSE	High	Sequest HT (A2)	[K].SETSGSFEDALLAIVK.[C]		1	1	P97429	P97429	0	2	0.8042	0	1	1	833.93	1666.85	-0.13	-0.00011	1.17418e+06	HCD (High Energy Collision Dissociation)	MS2	13.0653	80	64.8681	26429	A001.raw	0/0	4.29					3.14115e+07	64.69
	FALSE	High	Sequest HT (A2)	[K].SETSGSFEDALLAIVK.[C]		1	1	P97429	P97429	0	2	0.8015	0	1	1	833.929	1666.85	-1.15	-0.00096	2.54456e+06	HCD (High Energy Collision Dissociation)	MS2	7.10806	51.549	64.5027	26252	A001.raw	0/0	4.13
	FALSE	High	Sequest HT (A2)	[R].NHLLHVFDEYKR.[I]		1	1	P97429	P97429	1	4	0.7494	0	1	1	393.459	1570.81	1.11	0.00044	620998	HCD (High Energy Collision Dissociation)	MS2	16.1264	80	37.0241	12746	A001.raw	0/0	4.03					1.92947e+06	37.03
	FALSE	High	Sequest HT (A2)	[K].SELSSNFEQVILGLMTPTVLYDVQELRR.[A]		1	1	P97429	P97429	1	3	0.7891	0	1	1	1079.9	3237.68	-1.18	-0.00128	112506	HCD (High Energy Collision Dissociation)	MS2	0	80	83.5747	35119	A001.raw	0/0	4.03					775757	83.58
	FALSE	High	Sequest HT (A2)	[K].GLGTDEDAIIGILAYR.[N]		1	1	P97429	P97429	0	2	0.7605	0	1	1	838.945	1676.88	-1.86	-0.00156	318245	HCD (High Energy Collision Dissociation)	MS2	0	80	62.7106	25387	A001.raw	0/0	3.8					697691	62.7
	FALSE	High	Sequest HT (A2)	[K].SETSGSFEDALLAIVK.[C]		1	1	P97429	P97429	0	2	0.8179	0	1	1	833.932	1666.86	1.48	0.00124	296844	HCD (High Energy Collision Dissociation)	MS2	21.9321	80	64.1482	26081	A001.raw	0/0	3.68					2259457	64.12
	FALSE	High	Sequest HT (A2)	[K-].AASGFNATEDAQTLRK.[A]		1	1	P97429	P97429	1	2	0.8093	0	1	1	840.42	1679.83	-1.22	-0.00102	303573	HCD (High Energy Collision Dissociation)	MS2	0	80	29.0344	8929	A001.raw	0/0	3.67					1.94809e+06	29.11
	FALSE	High	Sequest HT (A2)	[K].GLGTDEDAIIGILAYR.[N]		1	1	P97429	P97429	0	3	0.7932	0	1	1	559.634	1676.89	0.42	0.00024	763255	HCD (High Energy Collision Dissociation)	MS2	6.93965	80	63.2744	25658	A001.raw	0/0	3.53					16258552	63.23
	FALSE	High	Sequest HT (A2)	[K-].AASGFNATEDAQTLRK.[A]		1	1	P97429	P97429	1	3	0.689	0	1	1	560.617	1679.84	1.03	0.00057	888552	HCD (High Energy Collision Dissociation)	MS2	43.9911	80	29.4611	9139	A001.raw	0/0	3.44
	FALSE	High	Sequest HT (A2)	[K].DIEQSIKSETSGSFEDALLAIVK.[C]		1	1	P97429	P97429	1	3	0.756	0	1	1	827.433	2480.29	3.72	0.00307	33805.1	HCD (High Energy Collision Dissociation)	MS2	26.3367	80	67.9414	27903	A001.raw	0/0	3.32					2.92643e+06	68.06
	FALSE	High	Sequest HT (A2)	[R].INQTYQQQYGR.[S]		1	1	P97429	P97429	0	2	0.7895	0	1	1	699.841	1398.68	-0.6	-0.00042	1.57352e+06	HCD (High Energy Collision Dissociation)	MS2	2.43595	80	23.3136	6225	A001.raw	0/0	3.23					1.33388e+06	23.31
	FALSE	High	Sequest HT (A2)	[R].INQTYQQQYGR.[S]		1	1	P97429	P97429	0	2	0.742	0	1	1	699.841	1398.67	-0.86	-0.0006	1.8279e+06	HCD (High Energy Collision Dissociation)	MS2	3.30547	78.041	22.9732	6068	A001.raw	0/0	3.14					2.73699e+06	22.95
	FALSE	High	Sequest HT (A2)	[R].ISQKDIEQSIKSETSGSFEDALLAIVK.[C]		1	1	P97429	P97429	2	3	0.7414	0	1	1	979.522	2936.55	1.67	0.00164	345349	HCD (High Energy Collision Dissociation)	MS2	71.2729	80	65.7544	26856	A001.raw	0/0	2.9
	FALSE	High	Sequest HT (A2)	[R].INQTYQQQYGR.[S]		1	1	P97429	P97429	0	2	0.8042	0	1	1	699.841	1398.68	-0.33	-0.00023	506187	HCD (High Energy Collision Dissociation)	MS2	10.0473	80	22.6156	5902	A001.raw	0/0	2.86					915131	22.64
	FALSE	High	Sequest HT (A2)	[K].GAGTDEGcLIEILASR.[T]	C8(Carbamidomethyl)	1	1	P97429	P97429	0	3	0.7133	0	1	1	554.611	1661.82	1.33	0.00073	582382	HCD (High Energy Collision Dissociation)	MS2	47.136	80	56.5224	22355	A001.raw	0/0	2.86					1.1812e+07	56.54
	FALSE	High	Sequest HT (A2)	[K].GLGTDEDAIIGILAYR.[N]		1	1	P97429	P97429	0	3	0.7519	0	1	1	559.634	1676.89	0.42	0.00024	1.11664e+06	HCD (High Energy Collision Dissociation)	MS2	16.6588	80	63.616	25823	A001.raw	0/0	2.7					9.35977e+06	63.59
	FALSE	High	Sequest HT (A2)	[K-].AASGFNATEDAQTLR.[K]		1	1	P97429	P97429	0	2	0.6679	0	1	1	776.372	1551.74	-1.56	-0.00121	239370	HCD (High Energy Collision Dissociation)	MS2	34.9467	80	32.5495	10584	A001.raw	0/0	2.62
	FALSE	High	Sequest HT (A2)	[K].GLGTDDNTLIR.[V]		1	1	P97429	P97429	0	2	0.7462	0	1	1	587.807	1174.61	-0.2	-0.00012	3.28212e+06	HCD (High Energy Collision Dissociation)	MS2	0.926801	26.318	33.8023	11188	A001.raw	0/0	2.6					1.38875e+07	33.71
	FALSE	High	Sequest HT (A2)	[R].INQTYQQQYGR.[S]		1	1	P97429	P97429	0	2	0.7432	0	1	1	699.841	1398.68	-0.42	-0.00029	517593	HCD (High Energy Collision Dissociation)	MS2	6.07692	80	23.6561	6388	A001.raw	0/0	2.57					440895	23.61
	FALSE	High	Sequest HT (A2)	[K].GLGTDDNTLIR.[V]		1	1	P97429	P97429	0	2	0.8	0	1	1	587.807	1174.61	0.21	0.00013	701349	HCD (High Energy Collision Dissociation)	MS2	11.325	80	34.1554	11363	A001.raw	0/0	2.55					493932	34.18
	FALSE	High	Sequest HT (A2)	[K].GLGTDDNTLIR.[V]		1	1	P97429	P97429	0	2	0.7131	0	1	1	587.808	1174.61	2.08	0.00122	813790	HCD (High Energy Collision Dissociation)	MS2	17.1362	80	33.4526	11017	A001.raw	0/0	2.44
	FALSE	High	Sequest HT (A2)	[K].FLSILcSR.[N]	C6(Carbamidomethyl)	1	1	P97429	P97429	0	2	0.5901	0	1	1	498.271	995.534	0.15	7e-05	6167038	HCD (High Energy Collision Dissociation)	MS2	1.19619	14.049	45.2294	16764	A001.raw	0/0	2.22					2.45883e+07	45.25
	FALSE	High	Sequest HT (A2)	[K].FLSILcSR.[N]	C6(Carbamidomethyl)	1	1	P97429	P97429	0	2	0.5654	0	1	1	498.27	995.532	-2.24	-0.00112	738150	HCD (High Energy Collision Dissociation)	MS2	30.5049	80	44.886	16594	A001.raw	0/0	2.14
	FALSE	High	Sequest HT (A2)	[K].FLSILcSR.[N]	C6(Carbamidomethyl)	1	1	P97429	P97429	0	2	0.5514	0	1	1	498.27	995.532	-1.94	-0.00096	1.28265e+06	HCD (High Energy Collision Dissociation)	MS2	14.2378	80	45.928	17115	A001.raw	0/0	2.14
	FALSE	High	Mascot (A6)	[K].GAGTDEGcLIEILASR.[T]	C8(Carbamidomethyl)	1	2	P97429	S4R1F2; P97429	0	2	1	0	1	1	831.412	1661.82	-0.35	-0.00029	3.73278e+06	HCD (High Energy Collision Dissociation)	MS2	10.9489	36.022	56.4058	22296	A001.raw	14/120		161	36	21	1.42509e-15	4.26853e+07	56.29
	FALSE	High	Mascot (A6)	[K].GAGTDEGcLIEILASR.[T]	C8(Carbamidomethyl)	1	2	P97429	S4R1F2; P97429	0	2	1	0	1	1	831.413	1661.82	1.26	0.00105	1.72153e+06	HCD (High Energy Collision Dissociation)	MS2	41.7574	53.643	56.7577	22472	A001.raw	14/120		161	37	21	1.49383e-15
	FALSE	High	Mascot (A6)	[K].GAGTDEGcLIEILASR.[T]	C8(Carbamidomethyl)	1	2	P97429	S4R1F2; P97429	0	2	1	0	1	1	831.411	1661.81	-1.16	-0.00097	2.9679e+06	HCD (High Energy Collision Dissociation)	MS2	38.9194	51.787	56.0594	22122	A001.raw	13/120		138	37	21	2.97189e-13	6.94616e+06	56.02
	FALSE	High	Mascot (A6)	[K].GLGTDEDAIIGILAYR.[N]		1	4	P97429	S4R1F2; D3Z0S1; F7ANV6; P97429	0	2	1	0	1	1	838.946	1676.88	-0.26	-0.00022	2.7525e+06	HCD (High Energy Collision Dissociation)	MS2	2.54728	80	63.0704	25560	A001.raw	14/120		108	35	20	2.10065e-10	5794098	63.08
	FALSE	High	Mascot (A6)	[K].SETSGSFEDALLAIVK.[C]		1	3	P97429	D3Z0S1; F7ANV6; P97429	0	2	1	0	1	1	833.932	1666.86	1.48	0.00124	296844	HCD (High Energy Collision Dissociation)	MS2	21.9321	80	64.1482	26081	A001.raw	13/120		108	36	21	3.04227e-10	2259457	64.12
	FALSE	High	Mascot (A6)	[K].SETSGSFEDALLAIVK.[C]		1	3	P97429	D3Z0S1; F7ANV6; P97429	0	2	1	0	1	1	833.929	1666.85	-1.15	-0.00096	2.54456e+06	HCD (High Energy Collision Dissociation)	MS2	7.10806	51.549	64.5027	26252	A001.raw	13/120		105	37	22	7.3868e-10
	FALSE	High	Mascot (A6)	[K].GLGTDEDAIIGILAYR.[N]		1	4	P97429	S4R1F2; D3Z0S1; F7ANV6; P97429	0	2	1	0	1	1	838.946	1676.88	-0.41	-0.00034	3.96249e+06	HCD (High Energy Collision Dissociation)	MS2	1.64014	42.937	63.4108	25724	A001.raw	14/120		104	35	20	5.41194e-10	2.44364e+07	63.38
	FALSE	High	Mascot (A6)	[K].GLGTDEDAIIGILAYR.[N]		1	4	P97429	S4R1F2; D3Z0S1; F7ANV6; P97429	0	2	1	0	1	1	838.945	1676.88	-1.86	-0.00156	318245	HCD (High Energy Collision Dissociation)	MS2	0	80	62.7106	25387	A001.raw	10/120		102	36	20	1.05539e-09	697691	62.7
	FALSE	High	Mascot (A6)	[K].SETSGSFEDALLAIVK.[C]		1	3	P97429	D3Z0S1; F7ANV6; P97429	0	2	1	0	1	1	833.93	1666.85	-0.13	-0.00011	1.17418e+06	HCD (High Energy Collision Dissociation)	MS2	13.0653	80	64.8681	26429	A001.raw	10/120		100	37	22	1.99168e-09	3.14115e+07	64.69
	FALSE	High	Mascot (A6)	[K].GLGTDEDAIIGILAYR.[N]		1	4	P97429	S4R1F2; D3Z0S1; F7ANV6; P97429	0	2	1	0	1	1	838.946	1676.88	-0.55	-0.00046	1.82412e+06	HCD (High Energy Collision Dissociation)	MS2	0	68.775	63.7543	25890	A001.raw	10/120		96	35	20	3.74833e-09	7.11461e+06	63.68
	FALSE	High	Mascot (A6)	[K-].AASGFNATEDAQTLR.[K]		1	4	P97429	S4R1F2; D3Z0S1; F7ANV6; P97429	0	2	1	0	1	1	776.373	1551.74	-0.77	-0.0006	1972209	HCD (High Energy Collision Dissociation)	MS2	3.86294	74.121	32.9111	10758	A001.raw	12/148		83	38	22	1.26933e-07	4.95744e+06	32.91
	FALSE	High	Mascot (A6)	[K].SELSSNFEQVILGLMTPTVLYDVQELRR.[A]		1	2	P97429	S4R1F2; P97429	1	3	1	0	1	1	1079.9	3237.68	-1.18	-0.00128	112506	HCD (High Energy Collision Dissociation)	MS2	0	80	83.5747	35119	A001.raw	16/304		78	34	19	1.57192e-07	775757	83.58
	FALSE	High	Mascot (A6)	[K-].AASGFNATEDAQTLRK.[A]		1	4	P97429	S4R1F2; D3Z0S1; F7ANV6; P97429	1	2	1	0	1	1	840.42	1679.83	-1.22	-0.00102	303573	HCD (High Energy Collision Dissociation)	MS2	0	80	29.0344	8929	A001.raw	9/160		78	37	22	3.50148e-07	1.94809e+06	29.11
	FALSE	High	Mascot (A6)	[R].INQTYQQQYGR.[S]		1	3	P97429	S4R1F2; D3Z0S1; P97429	0	2	1	0	1	1	699.841	1398.67	-0.86	-0.0006	1.8279e+06	HCD (High Energy Collision Dissociation)	MS2	3.30547	78.041	22.9732	6068	A001.raw	9/116		71	37	22	1.77195e-06	2.73699e+06	22.95
	FALSE	High	Mascot (A6)	[R].INQTYQQQYGR.[S]		1	3	P97429	S4R1F2; D3Z0S1; P97429	0	2	1	0	1	1	699.841	1398.68	-0.6	-0.00042	1.57352e+06	HCD (High Energy Collision Dissociation)	MS2	2.43595	80	23.3136	6225	A001.raw	9/116		70	37	22	1.85675e-06	1.33388e+06	23.31
	FALSE	High	Mascot (A6)	[K].GLGTDDNTLIR.[V]		1	3	P97429	D3Z0S1; F7ANV6; P97429	0	2	0.9571	0	1	1	587.807	1174.61	-0.2	-0.00012	3.28212e+06	HCD (High Energy Collision Dissociation)	MS2	0.926801	26.318	33.8023	11188	A001.raw	7/96		70	35	20	1.49133e-06	1.38875e+07	33.71
	FALSE	High	Mascot (A6)	[R].INQTYQQQYGR.[S]		1	3	P97429	S4R1F2; D3Z0S1; P97429	0	2	1	0	1	1	699.841	1398.68	-0.33	-0.00023	506187	HCD (High Energy Collision Dissociation)	MS2	10.0473	80	22.6156	5902	A001.raw	10/116		68	37	22	3.33324e-06	915131	22.64
	FALSE	High	Mascot (A6)	[R].DLIEDLKSELSSNFEQVILGLMTPTVLYDVQELR.[R]		1	2	P97429	S4R1F2; P97429	1	4	1	0	1	1	977.76	3908.02	-2.09	-0.00204	82703.7	HCD (High Energy Collision Dissociation)	MS2	66.0629	80	100.206	41932	A001.raw	17/372		66	34	19	2.5961e-06	1.23689e+06	100.15
	FALSE	High	Mascot (A6)	[R].INQTYQQQYGR.[S]		1	3	P97429	S4R1F2; D3Z0S1; P97429	0	2	1	0	1	1	699.841	1398.68	-0.42	-0.00029	517593	HCD (High Energy Collision Dissociation)	MS2	6.07692	80	23.6561	6388	A001.raw	8/116		64	37	22	7.41084e-06	440895	23.61
	FALSE	High	Mascot (A6)	[K].GLGTDDNTLIR.[V]		1	3	P97429	D3Z0S1; F7ANV6; P97429	0	2	0.8644	0	1	1	587.807	1174.61	0.21	0.00013	701349	HCD (High Energy Collision Dissociation)	MS2	11.325	80	34.1554	11363	A001.raw	9/96		59	35	20	1.66945e-05	493932	34.18
	FALSE	High	Mascot (A6)	[K].GLGTDDNTLIR.[V]		1	3	P97429	D3Z0S1; F7ANV6; P97429	0	2	0.7719	0	1	1	587.808	1174.61	2.08	0.00122	813790	HCD (High Energy Collision Dissociation)	MS2	17.1362	80	33.4526	11017	A001.raw	9/96		57	35	20	3.09725e-05
	FALSE	High	Mascot (A6)	[K].GLGTDEDAIIGILAYR.[N]		1	4	P97429	S4R1F2; D3Z0S1; F7ANV6; P97429	0	3	1	0	1	1	559.634	1676.89	0.42	0.00024	763255	HCD (High Energy Collision Dissociation)	MS2	6.93965	80	63.2744	25658	A001.raw	10/120		54	35	20	6.29153e-05	16258552	63.23
	FALSE	High	Mascot (A6)	[K].DIEQSIKSETSGSFEDALLAIVK.[C]		1	3	P97429	D3Z0S1; F7ANV6; P97429	1	3	1	0	1	1	827.433	2480.29	3.72	0.00307	33805.1	HCD (High Energy Collision Dissociation)	MS2	26.3367	80	67.9414	27903	A001.raw	13/252		53	35	20	7.5226e-05	2.92643e+06	68.06
	FALSE	High	Mascot (A6)	[K-].AASGFNATEDAQTLRK.[A]		1	4	P97429	S4R1F2; D3Z0S1; F7ANV6; P97429	1	3	1	0	1	1	560.617	1679.84	1.03	0.00057	987541	HCD (High Energy Collision Dissociation)	MS2	15.5305	80	28.676	8756	A001.raw	19/160		53	36	21	0.000103275	1.5066e+06	28.66
	FALSE	High	Mascot (A6)	[K].FLSILcSR.[N]	C6(Carbamidomethyl)	1	3	P97429	D3Z0S1; F7ANV6; P97429	0	2	0.9792	0	1	1	498.271	995.534	0.15	7e-05	6167038	HCD (High Energy Collision Dissociation)	MS2	1.19619	14.049	45.2294	16764	A001.raw	5/56		48	32	17	0.00011513	2.45883e+07	45.25
	FALSE	High	Mascot (A6)	[K].FLSILcSR.[N]	C6(Carbamidomethyl)	1	3	P97429	D3Z0S1; F7ANV6; P97429	0	2	0.9792	0	1	1	498.27	995.533	-0.89	-0.00045	8091516	HCD (High Energy Collision Dissociation)	MS2	2.07004	11.379	45.5789	16939	A001.raw	5/56		48	35	19	0.000199232	4.01133e+07	45.5
	FALSE	High	Mascot (A6)	[K-].AASGFNATEDAQTLR.[K]		1	4	P97429	S4R1F2; D3Z0S1; F7ANV6; P97429	0	2	1	0	1	1	776.372	1551.74	-1.56	-0.00121	239370	HCD (High Energy Collision Dissociation)	MS2	34.9467	80	32.5495	10584	A001.raw	9/148		48	37	22	0.000404099
	FALSE	High	Mascot (A6)	[K].FLSILcSR.[N]	C6(Carbamidomethyl)	1	3	P97429	D3Z0S1; F7ANV6; P97429	0	2	0.9787	0	1	1	498.27	995.532	-1.94	-0.00096	1.28265e+06	HCD (High Energy Collision Dissociation)	MS2	14.2378	80	45.928	17115	A001.raw	5/56		47	34	18	0.000182392
	FALSE	High	Mascot (A6)	[K].FLSILcSR.[N]	C6(Carbamidomethyl)	1	3	P97429	D3Z0S1; F7ANV6; P97429	0	2	1	0	1	1	498.27	995.532	-2.24	-0.00112	738150	HCD (High Energy Collision Dissociation)	MS2	30.5049	80	44.886	16594	A001.raw	5/56		47	34	18	0.000204176
	FALSE	High	Mascot (A6)	[R].ISQKDIEQSIKSETSGSFEDALLAIVK.[C]		1	3	P97429	D3Z0S1; F7ANV6; P97429	2	4	1	0	1	1	734.891	2936.54	-1.74	-0.00128	280978	HCD (High Energy Collision Dissociation)	MS2	7.68174	80	65.9541	26952	A001.raw	12/304		40	33	18	0.000866894	4.80212e+06	65.9
	FALSE	High	Mascot (A6)	[R].DLIEDLKSELSSNFEQVILGLMTPTVLYDVQELRR.[A]		1	2	P97429	S4R1F2; P97429	2	4	1	0	1	1	1016.79	4064.14	2.43	0.00247	234599	HCD (High Energy Collision Dissociation)	MS2	37.3998	80	96.7426	40493	A001.raw	20/384		40	32	17	0.000767638	6671004	96.78
	FALSE	High	Mascot (A6)	[K].GAGTDEGcLIEILASR.[T]	C8(Carbamidomethyl)	1	2	P97429	S4R1F2; P97429	0	3	1	0	1	1	554.611	1661.82	1.33	0.00073	582382	HCD (High Energy Collision Dissociation)	MS2	47.136	80	56.5224	22355	A001.raw	8/120		39	37	21	0.00224027	1.1812e+07	56.54
	FALSE	High	Mascot (A6)	[K].GLGTDEDAIIGILAYR.[N]		1	4	P97429	S4R1F2; D3Z0S1; F7ANV6; P97429	0	3	1	0	1	1	559.634	1676.89	0.42	0.00024	1.11664e+06	HCD (High Energy Collision Dissociation)	MS2	16.6588	80	63.616	25823	A001.raw	8/120		39	35	20	0.00174887	9.35977e+06	63.59
	FALSE	High	Mascot (A6)	[R].NHLLHVFDEYKR.[I]		1	3	P97429	D3Z0S1; F7ANV6; P97429	1	4	1	0	1	1	393.458	1570.81	-0.68	-0.00027	782431	HCD (High Energy Collision Dissociation)	MS2	22.8218	80	37.3703	12916	A001.raw	12/132		37	35	20	0.00293665
	FALSE	High	Mascot (A6)	[K].GLGTDEDAIIGILAYR.[N]		1	4	P97429	S4R1F2; D3Z0S1; F7ANV6; P97429	0	3	1	0	1	1	559.633	1676.89	-0.02	-1e-05	233548	HCD (High Energy Collision Dissociation)	MS2	26.0163	80	62.9181	25487	A001.raw	7/120		36	35	20	0.00379076	1.92526e+06	62.88
FALSE	Master Protein	Q61207	Prosaposin OS=Mus musculus GN=Psap PE=1 SV=2	46.8582	16	107	0	1	557	61.4	5.19	High		High	0	185.7	16	High	0	3020	16
	Checked	Confidence	Identifying Node	Annotated Sequence	Modifications	# Protein Groups	# Proteins	Master Protein Accessions	Protein Accessions	# Missed Cleavages	Charge	DeltaScore	DeltaCn	Rank	Search Engine Rank	m/z [Da]	MH+ [Da]	DeltaM [ppm]	Deltam/z [Da]	Intensity	Activation Type	MS Order	Isolation Interference [%]	Ion Inject Time [ms]	RT [min]	First Scan	Spectrum File	Ions Matched	XCorr	Ions Score	Identity Strict	Identity Relaxed	Expectation Value	Area	Apex RT [min]
	FALSE	High	Sequest HT (A2)	[R].VVAPFMSNIPLLLYPQDHPR.[S]		1	1	Q61207	Q61207	0	3	0.8872	0	1	1	769.748	2307.23	-1.13	-0.00087	2.58682e+06	HCD (High Energy Collision Dissociation)	MS2	4.68401	80	65.6734	26816	A001.raw	0/0	5.41					1.8505e+07	65.75
	FALSE	High	Sequest HT (A2)	[K].TcEWIHDSSLSAScK.[E]	C2(Carbamidomethyl); C14(Carbamidomethyl)	1	1	Q61207	Q61207	0	2	0.8277	0	1	1	890.883	1780.76	-2.48	-0.00221	903280	HCD (High Energy Collision Dissociation)	MS2	0	80	34.3579	11460	A001.raw	0/0	5.34					6.33233e+06	34.37
	FALSE	High	Sequest HT (A2)	[R].VVAPFMSNIPLLLYPQDHPR.[S]		1	1	Q61207	Q61207	0	2	0.8891	0	1	1	1154.12	2307.23	-0.46	-0.00053	756777	HCD (High Energy Collision Dissociation)	MS2	0	80	65.2099	26594	A001.raw	0/0	5.32					1.60511e+07	65.15
	FALSE	High	Sequest HT (A2)	[K].TcEWIHDSSLSAScK.[E]	C2(Carbamidomethyl); C14(Carbamidomethyl)	1	1	Q61207	Q61207	0	2	0.789	0	1	1	890.884	1780.76	-0.7	-0.00063	965912	HCD (High Energy Collision Dissociation)	MS2	2.6917	80	34.0108	11292	A001.raw	0/0	5.26					1.00493e+07	34.07
	FALSE	High	Sequest HT (A2)	[K].QcDDFVAEYEPLLLEILVEVMDPGFVcSK.[I]	C2(Carbamidomethyl); C27(Carbamidomethyl)	1	1	Q61207	Q61207	0	3	0.8407	0	1	1	1139.21	3415.6	-3.01	-0.00343	97312.9	HCD (High Energy Collision Dissociation)	MS2	0	80	99.8047	41757	A001.raw	0/0	4.96					2.03375e+06	99.71
	FALSE	High	Sequest HT (A2)	[R].VVAPFMSNIPLLLYPQDHPR.[S]		1	1	Q61207	Q61207	0	3	0.8667	0	1	1	769.749	2307.23	0.38	0.00029	12446696	HCD (High Energy Collision Dissociation)	MS2	1.1201	16.837	65.3161	26645	A001.raw	0/0	4.95					3.3767e+08	65.16
	FALSE	High	Sequest HT (A2)	[K].NILPALEMMDPYEQNLVQAHNVILcQTcQFVMNK.[F]	C25(Carbamidomethyl); C28(Carbamidomethyl)	1	1	Q61207	Q61207	0	4	0.6803	0	1	1	1016.24	4061.95	1.6	0.00162	166534	HCD (High Energy Collision Dissociation)	MS2	0	80	72.3723	30018	A001.raw	0/0	4.88					1.03172e+07	72.38
	FALSE	High	Sequest HT (A2)	[K].cVWGPSYWcQNMETAAR.[C]	C1(Carbamidomethyl); C9(Carbamidomethyl)	1	1	Q61207	Q61207	0	2	0.8251	0	1	1	1058.44	2115.88	-2.43	-0.00257	375459	HCD (High Energy Collision Dissociation)	MS2	0	80	51.9212	20071	A001.raw	0/0	4.86					2135732	51.96
	FALSE	High	Sequest HT (A2)	[K].GEMSNPGEVcSALNLcQSLQEYLAEQNQK.[Q]	C10(Carbamidomethyl); C16(Carbamidomethyl)	1	1	Q61207	Q61207	0	3	0.7687	0	1	1	1099.83	3297.48	-0.04	-5e-05	353985	HCD (High Energy Collision Dissociation)	MS2	6.85553	80	62.8	25430	A001.raw	0/0	4.8					6460222	62.76
	FALSE	High	Sequest HT (A2)	[R].VVAPFMSNIPLLLYPQDHPR.[S]		1	1	Q61207	Q61207	0	4	0.8021	0	1	1	577.563	2307.23	-1.05	-0.00061	1.22092e+06	HCD (High Energy Collision Dissociation)	MS2	7.42306	80	65.0954	26540	A001.raw	0/0	4.7					27103600	65.08
	FALSE	High	Sequest HT (A2)	[R].VVAPFmSNIPLLLYPQDHPR.[S]	M6(Oxidation)	1	1	Q61207	Q61207	0	3	0.8103	0	1	1	775.08	2323.23	-0.53	-0.00041	787924	HCD (High Energy Collision Dissociation)	MS2	3.24901	80	58.9936	23575	A001.raw	0/0	4.64					4.60399e+06	58.96
	FALSE	High	Sequest HT (A2)	[K].cVWGPSYWcQNMETAAR.[C]	C1(Carbamidomethyl); C9(Carbamidomethyl)	1	1	Q61207	Q61207	0	2	0.8208	0	1	1	1058.44	2115.88	-1.16	-0.00123	274051	HCD (High Energy Collision Dissociation)	MS2	0	80	52.2918	20253	A001.raw	0/0	4.52
	FALSE	High	Sequest HT (A2)	[K].TcEWIHDSSLSAScK.[E]	C2(Carbamidomethyl); C14(Carbamidomethyl)	1	1	Q61207	Q61207	0	3	0.7079	0	1	1	594.259	1780.76	-0.2	-0.00012	2.26858e+06	HCD (High Energy Collision Dissociation)	MS2	11.5023	31.556	34.0305	11302	A001.raw	0/0	4.45					7.83667e+06	34.07
	FALSE	High	Sequest HT (A2)	[K].cVWGPSYWcQNMETAAR.[C]	C1(Carbamidomethyl); C9(Carbamidomethyl)	1	1	Q61207	Q61207	0	2	0.8202	0	1	1	1058.45	2115.88	0.57	0.0006	644202	HCD (High Energy Collision Dissociation)	MS2	0	80	51.5755	19900	A001.raw	0/0	4.45					5.39617e+06	51.61
	FALSE	High	Sequest HT (A2)	[K].NILPALEMMDPYEQNLVQAHNVILcQTcQFVMNK.[F]	C25(Carbamidomethyl); C28(Carbamidomethyl)	1	1	Q61207	Q61207	0	4	0.6511	0	1	1	1016.24	4061.94	0.39	0.0004	129748	HCD (High Energy Collision Dissociation)	MS2	3.80462	80	72.7197	30183	A001.raw	0/0	4.27					1.95168e+06	72.66
	FALSE	High	Sequest HT (A2)	[K].TcEWIHDSSLSAScK.[E]	C2(Carbamidomethyl); C14(Carbamidomethyl)	1	1	Q61207	Q61207	0	3	0.7222	0	1	1	594.259	1780.76	-0.81	-0.00048	2.03308e+06	HCD (High Energy Collision Dissociation)	MS2	28.221	32.789	34.3803	11472	A001.raw	0/0	4.14					9.62939e+06	34.34
	FALSE	High	Sequest HT (A2)	[K].GLSNAcALLPDPAR.[T]	C6(Carbamidomethyl)	1	1	Q61207	Q61207	0	2	0.7627	0	1	1	727.874	1454.74	-1.2	-0.00087	6629771	HCD (High Energy Collision Dissociation)	MS2	0.838859	19.572	44.0317	16166	A001.raw	0/0	4.13					1.15441e+07	44.11
	FALSE	High	Sequest HT (A2)	[K].GLSNAcALLPDPAR.[T]	C6(Carbamidomethyl)	1	1	Q61207	Q61207	0	2	0.7494	0	1	1	727.877	1454.75	2.66	0.00194	986549	HCD (High Energy Collision Dissociation)	MS2	10.0568	80	44.3916	16345	A001.raw	0/0	4.11					2.05715e+06	44.35
	FALSE	High	Sequest HT (A2)	[K].TcEWIHDSSLSAScK.[E]	C2(Carbamidomethyl); C14(Carbamidomethyl)	1	1	Q61207	Q61207	0	2	0.8224	0	1	1	890.885	1780.76	-0.36	-0.00032	274892	HCD (High Energy Collision Dissociation)	MS2	23.2221	80	34.7108	11635	A001.raw	0/0	4.11					4.12936e+06	34.68
	FALSE	High	Sequest HT (A2)	[K].QLESNKIPEVDMAR.[V]		1	1	Q61207	Q61207	1	2	0.742	0	1	1	815.417	1629.83	-0.31	-0.00025	795161	HCD (High Energy Collision Dissociation)	MS2	0	80	34.8782	11719	A001.raw	0/0	4.07
	FALSE	High	Sequest HT (A2)	[R].VVAPFMSNIPLLLYPQDHPR.[S]		1	1	Q61207	Q61207	0	3	0.8396	0	1	1	769.747	2307.23	-2.16	-0.00166	784024	HCD (High Energy Collision Dissociation)	MS2	26.9851	80	64.9685	26478	A001.raw	0/0	3.99
	FALSE	High	Sequest HT (A2)	[R].VVAPFMSNIPLLLYPQDHPR.[S]		1	1	Q61207	Q61207	0	3	0.787	0	1	1	769.748	2307.23	-0.57	-0.00044	960246	HCD (High Energy Collision Dissociation)	MS2	15.3613	80	66.0189	26983	A001.raw	0/0	3.85
	FALSE	High	Sequest HT (A2)	[K].cVWGPSYWcQNMETAAR.[C]	C1(Carbamidomethyl); C9(Carbamidomethyl)	1	1	Q61207	Q61207	0	2	0.8316	0	1	1	1058.44	2115.88	-1.28	-0.00135	443106	HCD (High Energy Collision Dissociation)	MS2	52.0728	80	62.9008	25479	A001.raw	0/0	3.74					5.0623e+06	62.89
	FALSE	High	Sequest HT (A2)	[K].GLSNAcALLPDPAR.[T]	C6(Carbamidomethyl)	1	1	Q61207	Q61207	0	2	0.7081	0	1	1	727.874	1454.74	-1.28	-0.00093	8674000	HCD (High Energy Collision Dissociation)	MS2	0	15.027	43.6862	16001	A001.raw	0/0	3.7					2.83307e+07	43.59
	FALSE	High	Sequest HT (A2)	[K].HcQQMVWSKPTAK.[S]	C2(Carbamidomethyl)	1	1	Q61207	Q61207	0	2	0.8242	0	1	1	800.889	1600.77	-0.54	-0.00043	410662	HCD (High Energy Collision Dissociation)	MS2	26.076	80	24.4633	6772	A001.raw	0/0	3.64					3.86363e+06	24.46
	FALSE	High	Sequest HT (A2)	[K].TcEWIHDSSLSAScK.[E]	C2(Carbamidomethyl); C14(Carbamidomethyl)	1	1	Q61207	Q61207	0	3	0.7045	0	1	1	594.259	1780.76	0.42	0.00025	564955	HCD (High Energy Collision Dissociation)	MS2	39.1153	80	33.6724	11124	A001.raw	0/0	3.52
	FALSE	High	Sequest HT (A2)	[K].EVVDSYLPVILDMIK.[G]		1	1	Q61207	Q61207	0	3	0.5831	0	1	1	578.651	1733.94	0.2	0.00012	1.73355e+06	HCD (High Energy Collision Dissociation)	MS2	2.08206	80	73.6202	30610	A001.raw	0/0	3.31					2.07456e+07	73.6
	FALSE	High	Sequest HT (A2)	[K].TcEWIHDSSLSAScK.[E]	C2(Carbamidomethyl); C14(Carbamidomethyl)	1	1	Q61207	Q61207	0	2	0.8287	0	1	1	890.882	1780.76	-3.38	-0.00301	339603	HCD (High Energy Collision Dissociation)	MS2	0	80	33.6607	11119	A001.raw	0/0	3.21
	FALSE	High	Sequest HT (A2)	[K].QLESNKIPEVDMAR.[V]		1	1	Q61207	Q61207	1	2	0.7299	0	1	1	815.414	1629.82	-3.46	-0.00282	444645	HCD (High Energy Collision Dissociation)	MS2	0	80	35.2358	11893	A001.raw	0/0	3.11					4.43023e+06	35.2
	FALSE	High	Sequest HT (A2)	[K].NILPALEMMDPYEQNLVQAHNVILcQTcQFVMNK.[F]	C25(Carbamidomethyl); C28(Carbamidomethyl)	1	1	Q61207	Q61207	0	3	0.7184	0	1	1	1354.65	4061.94	0.08	0.00011	74740	HCD (High Energy Collision Dissociation)	MS2	12.4144	80	72.6232	30137	A001.raw	0/0	3.09					1.75533e+06	72.5
	FALSE	High	Sequest HT (A2)	[K].EVVDSYLPVILDMIK.[G]		1	1	Q61207	Q61207	0	2	0.7647	0	1	1	867.472	1733.94	-0.99	-0.00086	2493342	HCD (High Energy Collision Dissociation)	MS2	0.578666	71.212	73.9903	30786	A001.raw	0/0	3.06
	FALSE	High	Sequest HT (A2)	[K].cVWGPSYWcQNMETAAR.[C]	C1(Carbamidomethyl); C9(Carbamidomethyl)	1	1	Q61207	Q61207	0	3	0.7467	0	1	1	705.966	2115.88	-0.3	-0.00021	484718	HCD (High Energy Collision Dissociation)	MS2	30.9428	80	52.0996	20160	A001.raw	0/0	3.04					1.42863e+06	52.09
	FALSE	High	Sequest HT (A2)	[R].VVAPFmSNIPLLLYPQDHPR.[S]	M6(Oxidation)	1	1	Q61207	Q61207	0	3	0.7282	0	1	1	775.078	2323.22	-3.37	-0.00261	186635	HCD (High Energy Collision Dissociation)	MS2	0	80	58.6447	23405	A001.raw	0/0	2.98					6.72191e+06	58.75
	FALSE	High	Sequest HT (A2)	[K].HcQQMVWSKPTAK.[S]	C2(Carbamidomethyl)	1	1	Q61207	Q61207	0	3	0.6208	0	1	1	534.262	1600.77	-1.05	-0.00056	678601	HCD (High Energy Collision Dissociation)	MS2	42.9505	44.463	24.9961	7026	A001.raw	0/0	2.98					3.69931e+06	24.98
	FALSE	High	Sequest HT (A2)	[K].HcQQMVWSKPTAK.[S]	C2(Carbamidomethyl)	1	1	Q61207	Q61207	0	2	0.7879	0	1	1	800.889	1600.77	-1.53	-0.00123	321125	HCD (High Energy Collision Dissociation)	MS2	15.1577	80	24.8235	6946	A001.raw	0/0	2.97					840857	24.81
	FALSE	High	Sequest HT (A2)	[K].EVVDSYLPVILDMIK.[G]		1	1	Q61207	Q61207	0	2	0.7517	0	1	1	867.473	1733.94	-0.07	-6e-05	424105	HCD (High Energy Collision Dissociation)	MS2	8.11624	80	74.3368	30951	A001.raw	0/0	2.9					334938	74.34
	FALSE	High	Sequest HT (A2)	[K].HcQQMVWSKPTAK.[S]	C2(Carbamidomethyl)	1	1	Q61207	Q61207	0	3	0.6206	0	1	1	534.262	1600.77	-1.16	-0.00062	389762	HCD (High Energy Collision Dissociation)	MS2	43.0372	80	25.7036	7356	A001.raw	0/0	2.82					665734	25.69
	FALSE	High	Sequest HT (A2)	[K].QLESNKIPEVDMAR.[V]		1	1	Q61207	Q61207	1	3	0.4659	0	1	1	543.947	1629.83	-0.32	-0.00017	2.06754e+06	HCD (High Energy Collision Dissociation)	MS2	14.1452	54.771	35.1293	11840	A001.raw	0/0	2.79					4.08971e+06	35.14
	FALSE	High	Sequest HT (A2)	[K].TVVTEAGNLLK.[D]		1	1	Q61207	Q61207	0	2	0.6642	0	1	1	572.833	1144.66	1.12	0.00064	3.49582e+06	HCD (High Energy Collision Dissociation)	MS2	37.2997	9.685	41.3223	14861	A001.raw	0/0	2.74					3.63146e+07	41.35
	FALSE	High	Sequest HT (A2)	[K].QLESNKIPEVDMAR.[V]		1	1	Q61207	Q61207	1	2	0.6679	0	1	1	815.416	1629.82	-1.36	-0.00111	397729	HCD (High Energy Collision Dissociation)	MS2	33.5386	80	34.5362	11550	A001.raw	0/0	2.71					1.01221e+06	34.52
	FALSE	High	Sequest HT (A2)	[K].EVVDSYLPVILDMIK.[G]		1	1	Q61207	Q61207	0	2	0.7127	0	1	1	867.473	1733.94	-0.14	-0.00013	4.35137e+06	HCD (High Energy Collision Dissociation)	MS2	0.883351	44.196	73.6432	30621	A001.raw	0/0	2.68					6.08802e+07	73.65
	FALSE	High	Sequest HT (A2)	[K].TcSGGSAVLcR.[D]	C2(Carbamidomethyl); C10(Carbamidomethyl)	1	1	Q61207	Q61207	0	2	0.6443	0	1	1	584.266	1167.52	-0.35	-0.0002	1371730	HCD (High Energy Collision Dissociation)	MS2	8.15496	63.122	21.0789	5208	A001.raw	0/0	2.53					1.09967e+06	21.06
	FALSE	High	Sequest HT (A2)	[K].EVVDSYLPVILDMIK.[G]		1	1	Q61207	Q61207	0	2	0.6957	0	1	1	867.474	1733.94	1.26	0.0011	756864	HCD (High Energy Collision Dissociation)	MS2	9.69807	80	73.2992	30458	A001.raw	0/0	2.53
	FALSE	High	Sequest HT (A2)	[K].LVSDVQTAVK.[T]		1	1	Q61207	Q61207	0	2	0.6883	0	1	1	530.306	1059.6	0.2	0.00011	5185548	HCD (High Energy Collision Dissociation)	MS2	4.34689	15.686	26.1334	7560	A001.raw	0/0	2.47					9.01762e+06	26.12
	FALSE	High	Sequest HT (A2)	[R].LGPGVSDIcK.[N]	C9(Carbamidomethyl)	1	1	Q61207	Q61207	0	2	0.5885	0	1	1	523.272	1045.54	2.51	0.00131	1.71795e+06	HCD (High Energy Collision Dissociation)	MS2	23.8754	61.861	30.2692	9516	A001.raw	0/0	2.43					2.82834e+06	30.23
	FALSE	High	Sequest HT (A2)	[K].IGVcPSAYK.[L]	C4(Carbamidomethyl)	1	1	Q61207	Q61207	0	2	0.6422	0	1	1	497.756	994.504	1.21	0.0006	6.9766e+06	HCD (High Energy Collision Dissociation)	MS2	16.7699	10.084	27.3684	8142	A001.raw	0/0	2.32					9.67689e+06	27.36
	FALSE	High	Sequest HT (A2)	[K].IGVcPSAYK.[L]	C4(Carbamidomethyl)	1	1	Q61207	Q61207	0	2	0.6652	0	1	1	497.755	994.503	0.23	0.00011	9885528	HCD (High Energy Collision Dissociation)	MS2	3.36817	7.046	27.7234	8303	A001.raw	0/0	2.3					3.5276e+07	27.78
	FALSE	High	Sequest HT (A2)	[R].LGPGVSDIcK.[N]	C9(Carbamidomethyl)	1	1	Q61207	Q61207	0	2	0.614	0	1	1	523.271	1045.53	-0.76	-0.0004	4.18541e+06	HCD (High Energy Collision Dissociation)	MS2	16.2999	18.127	29.2119	9017	A001.raw	0/0	2.28					8.7359e+06	29.2
	FALSE	High	Sequest HT (A2)	[K].TcSGGSAVLcR.[D]	C2(Carbamidomethyl); C10(Carbamidomethyl)	1	1	Q61207	Q61207	0	2	0.6545	0	1	1	584.266	1167.52	-0.24	-0.00014	544688	HCD (High Energy Collision Dissociation)	MS2	16.0364	80	20.7378	5060	A001.raw	0/0	2.2
	FALSE	High	Sequest HT (A2)	[K].LVSDVQTAVK.[T]		1	1	Q61207	Q61207	0	2	0.6927	0	1	1	530.306	1059.6	0.31	0.00017	6.47004e+06	HCD (High Energy Collision Dissociation)	MS2	1.75895	11.076	26.481	7726	A001.raw	0/0	2.18					3.37787e+07	26.41
	FALSE	High	Sequest HT (A2)	[K].TVVTEAGNLLK.[D]		1	1	Q61207	Q61207	0	2	0.5161	0	1	1	572.831	1144.66	-1.65	-0.00095	1201734	HCD (High Energy Collision Dissociation)	MS2	18.612	67.695	42.0197	15195	A001.raw	0/0	2.17					2.28887e+06	41.94
	FALSE	High	Sequest HT (A2)	[K].TLVPATETIK.[N]		1	1	Q61207	Q61207	0	2	0.6603	0	1	1	536.816	1072.62	0.07	4e-05	3.0548e+06	HCD (High Energy Collision Dissociation)	MS2	9.23712	24.593	32.1226	10376	A001.raw	0/0	2.09					1.26746e+07	32.18
	FALSE	High	Mascot (A6)	[R].VVAPFMSNIPLLLYPQDHPR.[S]		1	5	Q61207	K3W4L3; Q8BFQ1; J3QPG5; Q61207; E9PZ00	0	2	1	0	1	1	1154.12	2307.23	-0.46	-0.00053	756777	HCD (High Energy Collision Dissociation)	MS2	0	80	65.2099	26594	A001.raw	13/200		108	32	17	1.08473e-10	1.60511e+07	65.15
	FALSE	High	Mascot (A6)	[K].cVWGPSYWcQNMETAAR.[C]	C1(Carbamidomethyl); C9(Carbamidomethyl)	1	5	Q61207	K3W4L3; Q8BFQ1; J3QPG5; Q61207; E9PZ00	0	2	1	0	1	1	1058.44	2115.88	-1.16	-0.00123	274051	HCD (High Energy Collision Dissociation)	MS2	0	80	52.2918	20253	A001.raw	11/156		107	37	22	3.92157e-10
	FALSE	High	Mascot (A6)	[R].VVAPFMSNIPLLLYPQDHPR.[S]		1	5	Q61207	K3W4L3; Q8BFQ1; J3QPG5; Q61207; E9PZ00	0	3	1	0	1	1	769.748	2307.23	-1.13	-0.00087	2.58682e+06	HCD (High Energy Collision Dissociation)	MS2	4.68401	80	65.6734	26816	A001.raw	12/200		103	33	17	4.31613e-10	1.8505e+07	65.75
	FALSE	High	Mascot (A6)	[K].TcSGGSAVLcR.[D]	C2(Carbamidomethyl); C10(Carbamidomethyl)	1	5	Q61207	K3W4L3; Q8BFQ1; J3QPG5; Q61207; E9PZ00	0	2	0.9412	0	1	1	584.266	1167.52	-0.35	-0.0002	1371730	HCD (High Energy Collision Dissociation)	MS2	8.15496	63.122	21.0789	5208	A001.raw	10/80		102	35	20	8.00827e-10	1.09967e+06	21.06
	FALSE	High	Mascot (A6)	[K].cVWGPSYWcQNMETAAR.[C]	C1(Carbamidomethyl); C9(Carbamidomethyl)	1	5	Q61207	K3W4L3; Q8BFQ1; J3QPG5; Q61207; E9PZ00	0	2	1	0	1	1	1058.44	2115.88	-2.43	-0.00257	375459	HCD (High Energy Collision Dissociation)	MS2	0	80	51.9212	20071	A001.raw	13/156		98	37	22	3.4778e-09	2135732	51.96
	FALSE	High	Mascot (A6)	[K].TcEWIHDSSLSAScK.[E]	C2(Carbamidomethyl); C14(Carbamidomethyl)	1	5	Q61207	K3W4L3; Q8BFQ1; J3QPG5; Q61207; E9PZ00	0	2	1	0	1	1	890.882	1780.76	-3.38	-0.00301	339603	HCD (High Energy Collision Dissociation)	MS2	0	80	33.6607	11119	A001.raw	13/112		97	37	22	3.79974e-09
	FALSE	High	Mascot (A6)	[K].GLSNAcALLPDPAR.[T]	C6(Carbamidomethyl)	1	5	Q61207	K3W4L3; Q8BFQ1; J3QPG5; Q61207; E9PZ00	0	2	1	0	1	1	727.874	1454.74	-1.28	-0.00093	8674000	HCD (High Energy Collision Dissociation)	MS2	0	15.027	43.6862	16001	A001.raw	11/144		97	36	20	3.17989e-09	2.83307e+07	43.59
	FALSE	High	Mascot (A6)	[K].TcEWIHDSSLSAScK.[E]	C2(Carbamidomethyl); C14(Carbamidomethyl)	1	5	Q61207	K3W4L3; Q8BFQ1; J3QPG5; Q61207; E9PZ00	0	2	1	0	1	1	890.883	1780.76	-2.48	-0.00221	903280	HCD (High Energy Collision Dissociation)	MS2	0	80	34.3579	11460	A001.raw	12/112		95	37	22	7.15087e-09	6.33233e+06	34.37
	FALSE	High	Mascot (A6)	[K].GLSNAcALLPDPAR.[T]	C6(Carbamidomethyl)	1	5	Q61207	K3W4L3; Q8BFQ1; J3QPG5; Q61207; E9PZ00	0	2	1	0	1	1	727.874	1454.74	-1.2	-0.00087	6629771	HCD (High Energy Collision Dissociation)	MS2	0.838859	19.572	44.0317	16166	A001.raw	11/144		90	36	20	1.44634e-08	1.15441e+07	44.11
	FALSE	High	Mascot (A6)	[R].VVAPFMSNIPLLLYPQDHPR.[S]		1	5	Q61207	K3W4L3; Q8BFQ1; J3QPG5; Q61207; E9PZ00	0	3	1	0	1	1	769.749	2307.23	0.38	0.00029	12446696	HCD (High Energy Collision Dissociation)	MS2	1.1201	16.837	65.3161	26645	A001.raw	11/200		90	32	17	7.16617e-09	3.3767e+08	65.16
	FALSE	High	Mascot (A6)	[K].QLESNKIPEVDMAR.[V]		1	5	Q61207	K3W4L3; Q8BFQ1; J3QPG5; Q61207; E9PZ00	1	2	1	0	1	1	815.416	1629.82	-1.36	-0.00111	397729	HCD (High Energy Collision Dissociation)	MS2	33.5386	80	34.5362	11550	A001.raw	9/156		89	37	22	2.52967e-08	1.01221e+06	34.52
	FALSE	High	Mascot (A6)	[K].cVWGPSYWcQNMETAAR.[C]	C1(Carbamidomethyl); C9(Carbamidomethyl)	1	5	Q61207	K3W4L3; Q8BFQ1; J3QPG5; Q61207; E9PZ00	0	2	1	0	1	1	1058.45	2115.88	0.57	0.0006	644202	HCD (High Energy Collision Dissociation)	MS2	0	80	51.5755	19900	A001.raw	15/156		89	37	22	2.68819e-08	5.39617e+06	51.61
	FALSE	High	Mascot (A6)	[K].cVWGPSYWcQNMETAAR.[C]	C1(Carbamidomethyl); C9(Carbamidomethyl)	1	5	Q61207	K3W4L3; Q8BFQ1; J3QPG5; Q61207; E9PZ00	0	2	1	0	1	1	1058.44	2115.88	-1.28	-0.00135	443106	HCD (High Energy Collision Dissociation)	MS2	52.0728	80	62.9008	25479	A001.raw	11/156		87	37	22	4.01096e-08	5.0623e+06	62.89
	FALSE	High	Mascot (A6)	[K].TcEWIHDSSLSAScK.[E]	C2(Carbamidomethyl); C14(Carbamidomethyl)	1	5	Q61207	K3W4L3; Q8BFQ1; J3QPG5; Q61207; E9PZ00	0	2	1	0	1	1	890.884	1780.76	-0.7	-0.00063	965912	HCD (High Energy Collision Dissociation)	MS2	2.6917	80	34.0108	11292	A001.raw	13/112		87	37	22	4.32795e-08	1.00493e+07	34.07
	FALSE	High	Mascot (A6)	[K].LVSDVQTAVK.[T]		1	5	Q61207	K3W4L3; Q8BFQ1; J3QPG5; Q61207; E9PZ00	0	2	0.9114	0	1	1	530.306	1059.6	0.31	0.00017	6.47004e+06	HCD (High Energy Collision Dissociation)	MS2	1.75895	11.076	26.481	7726	A001.raw	7/88		79	34	19	1.34671e-07	3.37787e+07	26.41
	FALSE	High	Mascot (A6)	[K].LVSDVQTAVK.[T]		1	5	Q61207	K3W4L3; Q8BFQ1; J3QPG5; Q61207; E9PZ00	0	2	0.8987	0	1	1	530.306	1059.6	0.2	0.00011	5185548	HCD (High Energy Collision Dissociation)	MS2	4.34689	15.686	26.1334	7560	A001.raw	7/88		79	34	19	1.34982e-07	9.01762e+06	26.12
	FALSE	High	Mascot (A6)	[R].VVAPFmSNIPLLLYPQDHPR.[S]	M6(Oxidation)	1	5	Q61207	K3W4L3; Q8BFQ1; J3QPG5; Q61207; E9PZ00	0	3	1	0	1	1	775.08	2323.23	-0.53	-0.00041	787924	HCD (High Energy Collision Dissociation)	MS2	3.24901	80	58.9936	23575	A001.raw	11/200		79	35	19	1.71358e-07	4.60399e+06	58.96
	FALSE	High	Mascot (A6)	[K].EVVDSYLPVILDMIK.[G]		1	5	Q61207	K3W4L3; Q8BFQ1; J3QPG5; Q61207; E9PZ00	0	2	1	0	1	1	867.473	1733.94	-0.14	-0.00013	4.35137e+06	HCD (High Energy Collision Dissociation)	MS2	0.883351	44.196	73.6432	30621	A001.raw	9/112		78	33	18	1.40762e-07	6.08802e+07	73.65
	FALSE	High	Mascot (A6)	[K].TcSGGSAVLcR.[D]	C2(Carbamidomethyl); C10(Carbamidomethyl)	1	5	Q61207	K3W4L3; Q8BFQ1; J3QPG5; Q61207; E9PZ00	0	2	0.92	0	1	1	584.266	1167.52	-0.56	-0.00033	947219	HCD (High Energy Collision Dissociation)	MS2	3.16673	80	21.4269	5363	A001.raw	9/80		75	35	20	4.1356e-07	1.49243e+06	21.44
	FALSE	High	Mascot (A6)	[R].VVAPFMSNIPLLLYPQDHPR.[S]		1	5	Q61207	K3W4L3; Q8BFQ1; J3QPG5; Q61207; E9PZ00	0	3	1	0	1	1	769.747	2307.23	-2.16	-0.00166	784024	HCD (High Energy Collision Dissociation)	MS2	26.9851	80	64.9685	26478	A001.raw	10/200		74	33	18	3.26112e-07
	FALSE	High	Mascot (A6)	[K].GLSNAcALLPDPAR.[T]	C6(Carbamidomethyl)	1	5	Q61207	K3W4L3; Q8BFQ1; J3QPG5; Q61207; E9PZ00	0	2	1	0	1	1	727.877	1454.75	2.66	0.00194	986549	HCD (High Energy Collision Dissociation)	MS2	10.0568	80	44.3916	16345	A001.raw	10/144		73	35	20	7.28219e-07	2.05715e+06	44.35
	FALSE	High	Mascot (A6)	[R].VVAPFMSNIPLLLYPQDHPR.[S]		1	5	Q61207	K3W4L3; Q8BFQ1; J3QPG5; Q61207; E9PZ00	0	3	1	0	1	1	769.748	2307.23	-0.57	-0.00044	960246	HCD (High Energy Collision Dissociation)	MS2	15.3613	80	66.0189	26983	A001.raw	12/200		72	32	17	4.87704e-07
	FALSE	High	Mascot (A6)	[K].QLESNKIPEVDMAR.[V]		1	5	Q61207	K3W4L3; Q8BFQ1; J3QPG5; Q61207; E9PZ00	1	2	1	0	1	1	815.417	1629.83	-0.31	-0.00025	795161	HCD (High Energy Collision Dissociation)	MS2	0	80	34.8782	11719	A001.raw	8/156		71	37	22	1.80072e-06
	FALSE	High	Mascot (A6)	[K].QLESNKIPEVDMAR.[V]		1	5	Q61207	K3W4L3; Q8BFQ1; J3QPG5; Q61207; E9PZ00	1	2	1	0	1	1	815.414	1629.82	-3.46	-0.00282	444645	HCD (High Energy Collision Dissociation)	MS2	0	80	35.2358	11893	A001.raw	8/156		70	37	22	2.17991e-06	4.43023e+06	35.2
	FALSE	High	Mascot (A6)	[K].HcQQMVWSKPTAK.[S]	C2(Carbamidomethyl)	1	5	Q61207	K3W4L3; Q8BFQ1; J3QPG5; Q61207; E9PZ00	0	2	1	0	1	1	800.889	1600.77	-1.53	-0.00123	321125	HCD (High Energy Collision Dissociation)	MS2	15.1577	80	24.8235	6946	A001.raw	12/136		69	37	22	2.61452e-06	840857	24.81
	FALSE	High	Mascot (A6)	[K].TcSGGSAVLcR.[D]	C2(Carbamidomethyl); C10(Carbamidomethyl)	1	5	Q61207	K3W4L3; Q8BFQ1; J3QPG5; Q61207; E9PZ00	0	2	0.913	0	1	1	584.266	1167.52	-0.24	-0.00014	544688	HCD (High Energy Collision Dissociation)	MS2	16.0364	80	20.7378	5060	A001.raw	9/80		69	35	20	1.78049e-06
	FALSE	High	Mascot (A6)	[K].IGVcPSAYK.[L]	C4(Carbamidomethyl)	1	5	Q61207	K3W4L3; Q8BFQ1; J3QPG5; Q61207; E9PZ00	0	2	0.9697	0	1	1	497.755	994.503	0.23	0.00011	9885528	HCD (High Energy Collision Dissociation)	MS2	3.36817	7.046	27.7234	8303	A001.raw	6/64		66	35	19	3.02682e-06	3.5276e+07	27.78
	FALSE	High	Mascot (A6)	[K].QcDDFVAEYEPLLLEILVEVMDPGFVcSK.[I]	C2(Carbamidomethyl); C27(Carbamidomethyl)	1	5	Q61207	K3W4L3; Q8BFQ1; J3QPG5; Q61207; E9PZ00	0	3	1	0	1	1	1139.21	3415.6	-3.01	-0.00343	97312.9	HCD (High Energy Collision Dissociation)	MS2	0	80	99.8047	41757	A001.raw	16/336		65	39	24	9.78464e-06	2.03375e+06	99.71
	FALSE	High	Mascot (A6)	[K].TcSGGSAVLcR.[D]	C2(Carbamidomethyl); C10(Carbamidomethyl)	1	5	Q61207	K3W4L3; Q8BFQ1; J3QPG5; Q61207; E9PZ00	0	2	0.9846	0	1	1	584.266	1167.52	-0.35	-0.0002	167785	HCD (High Energy Collision Dissociation)	MS2	9.99923	80	20.3997	4916	A001.raw	8/80		65	35	20	4.2028e-06	578193	20.41
	FALSE	High	Mascot (A6)	[K].TcEWIHDSSLSAScK.[E]	C2(Carbamidomethyl); C14(Carbamidomethyl)	1	5	Q61207	K3W4L3; Q8BFQ1; J3QPG5; Q61207; E9PZ00	0	3	1	0	1	1	594.259	1780.76	-0.2	-0.00012	2.26858e+06	HCD (High Energy Collision Dissociation)	MS2	11.5023	31.556	34.0305	11302	A001.raw	8/112		65	37	22	7.05414e-06	7.83667e+06	34.07
	FALSE	High	Mascot (A6)	[R].VVAPFmSNIPLLLYPQDHPR.[S]	M6(Oxidation)	1	5	Q61207	K3W4L3; Q8BFQ1; J3QPG5; Q61207; E9PZ00	0	3	1	0	1	1	775.078	2323.22	-3.37	-0.00261	186635	HCD (High Energy Collision Dissociation)	MS2	0	80	58.6447	23405	A001.raw	10/200		64	35	19	5.0572e-06	6.72191e+06	58.75
	FALSE	High	Mascot (A6)	[R].LGPGVSDIcK.[N]	C9(Carbamidomethyl)	1	5	Q61207	K3W4L3; Q8BFQ1; J3QPG5; Q61207; E9PZ00	0	2	0.9683	0	1	1	523.273	1045.54	2.97	0.00156	8367936	HCD (High Energy Collision Dissociation)	MS2	6.50789	11.291	29.9206	9357	A001.raw	9/72		63	35	20	6.84483e-06	1.51893e+07	29.91
	FALSE	High	Mascot (A6)	[K].HcQQMVWSKPTAK.[S]	C2(Carbamidomethyl)	1	5	Q61207	K3W4L3; Q8BFQ1; J3QPG5; Q61207; E9PZ00	0	2	1	0	1	1	800.889	1600.77	-0.54	-0.00043	410662	HCD (High Energy Collision Dissociation)	MS2	26.076	80	24.4633	6772	A001.raw	11/136		62	37	22	1.33166e-05	3.86363e+06	24.46
	FALSE	High	Mascot (A6)	[K].EVVDSYLPVILDMIK.[G]		1	5	Q61207	K3W4L3; Q8BFQ1; J3QPG5; Q61207; E9PZ00	0	2	1	0	1	1	867.472	1733.94	-0.99	-0.00086	2493342	HCD (High Energy Collision Dissociation)	MS2	0.578666	71.212	73.9903	30786	A001.raw	8/112		62	33	18	5.50626e-06
	FALSE	High	Mascot (A6)	[K].EVVDSYLPVILDMIK.[G]		1	5	Q61207	K3W4L3; Q8BFQ1; J3QPG5; Q61207; E9PZ00	0	2	1	0	1	1	867.474	1733.94	1.26	0.0011	756864	HCD (High Energy Collision Dissociation)	MS2	9.69807	80	73.2992	30458	A001.raw	8/112		61	33	17	5.73669e-06
	FALSE	High	Mascot (A6)	[K].EVVDSYLPVILDMIK.[G]		1	5	Q61207	K3W4L3; Q8BFQ1; J3QPG5; Q61207; E9PZ00	0	2	1	0	1	1	867.473	1733.94	-0.07	-6e-05	424105	HCD (High Energy Collision Dissociation)	MS2	8.11624	80	74.3368	30951	A001.raw	8/112		61	33	18	6.35445e-06	334938	74.34
	FALSE	High	Mascot (A6)	[R].VVAPFMSNIPLLLYPQDHPR.[S]		1	5	Q61207	K3W4L3; Q8BFQ1; J3QPG5; Q61207; E9PZ00	0	4	1	0	1	1	577.563	2307.23	-1.05	-0.00061	1.22092e+06	HCD (High Energy Collision Dissociation)	MS2	7.42306	80	65.0954	26540	A001.raw	10/200		60	33	17	8.28123e-06	27103600	65.08
	FALSE	High	Mascot (A6)	[R].LGPGVSDIcK.[N]	C9(Carbamidomethyl)	1	5	Q61207	K3W4L3; Q8BFQ1; J3QPG5; Q61207; E9PZ00	0	2	0.9828	0	1	1	523.272	1045.54	1.34	0.0007	7.36227e+06	HCD (High Energy Collision Dissociation)	MS2	4.18349	9.856	29.5696	9192	A001.raw	6/72		58	35	20	1.98734e-05	3.37996e+07	29.64
	FALSE	High	Mascot (A6)	[R].LGPGVSDIcK.[N]	C9(Carbamidomethyl)	1	5	Q61207	K3W4L3; Q8BFQ1; J3QPG5; Q61207; E9PZ00	0	2	1	0	1	1	523.271	1045.53	-0.76	-0.0004	4.18541e+06	HCD (High Energy Collision Dissociation)	MS2	16.2999	18.127	29.2119	9017	A001.raw	6/72		58	35	20	2.26387e-05	8.7359e+06	29.2
	FALSE	High	Mascot (A6)	[R].LGPGVSDIcK.[N]	C9(Carbamidomethyl)	1	5	Q61207	K3W4L3; Q8BFQ1; J3QPG5; Q61207; E9PZ00	0	2	1	0	1	1	523.272	1045.54	2.51	0.00131	1.71795e+06	HCD (High Energy Collision Dissociation)	MS2	23.8754	61.861	30.2692	9516	A001.raw	6/72		57	35	20	2.58302e-05	2.82834e+06	30.23
	FALSE	High	Mascot (A6)	[K].TcEWIHDSSLSAScK.[E]	C2(Carbamidomethyl); C14(Carbamidomethyl)	1	5	Q61207	K3W4L3; Q8BFQ1; J3QPG5; Q61207; E9PZ00	0	3	1	0	1	1	594.259	1780.76	-0.81	-0.00048	2.03308e+06	HCD (High Energy Collision Dissociation)	MS2	28.221	32.789	34.3803	11472	A001.raw	10/112		55	37	22	6.32992e-05	9.62939e+06	34.34
	FALSE	High	Mascot (A6)	[K].TcEWIHDSSLSAScK.[E]	C2(Carbamidomethyl); C14(Carbamidomethyl)	1	5	Q61207	K3W4L3; Q8BFQ1; J3QPG5; Q61207; E9PZ00	0	2	1	0	1	1	890.885	1780.76	-0.36	-0.00032	274892	HCD (High Energy Collision Dissociation)	MS2	23.2221	80	34.7108	11635	A001.raw	11/112		54	37	22	9.40673e-05	4.12936e+06	34.68
	FALSE	High	Mascot (A6)	[K].TcSGGSAVLcR.[D]	C2(Carbamidomethyl); C10(Carbamidomethyl)	1	5	Q61207	K3W4L3; Q8BFQ1; J3QPG5; Q61207; E9PZ00	0	2	0.9811	0	1	1	584.266	1167.52	-0.56	-0.00033	157530	HCD (High Energy Collision Dissociation)	MS2	14.7114	80	21.7824	5524	A001.raw	7/80		53	35	20	6.24509e-05
	FALSE	High	Mascot (A6)	[K].EVVDSYLPVILDMIK.[G]		1	5	Q61207	K3W4L3; Q8BFQ1; J3QPG5; Q61207; E9PZ00	0	2	1	0	1	1	867.472	1733.94	-1.83	-0.00159	93519.4	HCD (High Energy Collision Dissociation)	MS2	8.08938	80	74.6924	31120	A001.raw	7/112		53	33	18	3.852e-05	425937	74.64
	FALSE	High	Mascot (A6)	[K].TVVTEAGNLLK.[D]		1	5	Q61207	K3W4L3; Q8BFQ1; J3QPG5; Q61207; E9PZ00	0	2	0.9804	0	1	1	572.833	1144.66	1.12	0.00064	3.49582e+06	HCD (High Energy Collision Dissociation)	MS2	37.2997	9.685	41.3223	14861	A001.raw	9/92		51	34	19	8.38926e-05	3.63146e+07	41.35
	FALSE	High	Mascot (A6)	[K].NILPALEMMDPYEQNLVQAHNVILcQTcQFVMNK.[F]	C25(Carbamidomethyl); C28(Carbamidomethyl)	1	5	Q61207	K3W4L3; Q8BFQ1; J3QPG5; Q61207; E9PZ00	0	4	1	0	1	1	1016.24	4061.95	1.6	0.00162	166534	HCD (High Energy Collision Dissociation)	MS2	0	80	72.3723	30018	A001.raw	9/396		48	38	23	0.000420844	1.03172e+07	72.38
	FALSE	High	Mascot (A6)	[K].GEMSNPGEVcSALNLcQSLQEYLAEQNQK.[Q]	C10(Carbamidomethyl); C16(Carbamidomethyl)	1	5	Q61207	K3W4L3; Q8BFQ1; J3QPG5; Q61207; E9PZ00	0	3	1	0	1	1	1099.83	3297.48	-0.04	-5e-05	353985	HCD (High Energy Collision Dissociation)	MS2	6.85553	80	62.8	25430	A001.raw	11/320		48	39	24	0.00055661	6460222	62.76
	FALSE	High	Mascot (A6)	[K].TcEWIHDSSLSAScK.[E]	C2(Carbamidomethyl); C14(Carbamidomethyl)	1	5	Q61207	K3W4L3; Q8BFQ1; J3QPG5; Q61207; E9PZ00	0	3	1	0	1	1	594.259	1780.76	0.42	0.00025	564955	HCD (High Energy Collision Dissociation)	MS2	39.1153	80	33.6724	11124	A001.raw	10/112		46	37	22	0.000577309
	FALSE	High	Mascot (A6)	[K].IGVcPSAYK.[L]	C4(Carbamidomethyl)	1	5	Q61207	K3W4L3; Q8BFQ1; J3QPG5; Q61207; E9PZ00	0	2	0.9512	0	1	1	497.756	994.504	1.21	0.0006	6.9766e+06	HCD (High Energy Collision Dissociation)	MS2	16.7699	10.084	27.3684	8142	A001.raw	8/64		41	35	20	0.00096221	9.67689e+06	27.36
	FALSE	High	Mascot (A6)	[K].TVVTEAGNLLK.[D]		1	5	Q61207	K3W4L3; Q8BFQ1; J3QPG5; Q61207; E9PZ00	0	2	0.9268	0	1	1	572.833	1144.66	0.8	0.00046	3.99796e+06	HCD (High Energy Collision Dissociation)	MS2	18.5984	21.135	41.6794	15031	A001.raw	6/92		41	34	19	0.000823614	2.42611e+07	41.58
	FALSE	High	Mascot (A6)	[K].TLVPATETIK.[N]		1	5	Q61207	K3W4L3; Q8BFQ1; J3QPG5; Q61207; E9PZ00	0	2	0.9756	0	1	1	536.816	1072.62	0.07	4e-05	8566764	HCD (High Energy Collision Dissociation)	MS2	7.18659	9.244	32.468	10543	A001.raw	7/72		41	33	18	0.00078309	3.26421e+07	32.57
	FALSE	High	Mascot (A6)	[K].LVSDVQTAVK.[T]		1	5	Q61207	K3W4L3; Q8BFQ1; J3QPG5; Q61207; E9PZ00	0	2	0.8537	0	1	1	530.307	1059.61	1.81	0.00096	1.53969e+06	HCD (High Energy Collision Dissociation)	MS2	5.20286	68.849	26.8398	7892	A001.raw	5/88		41	34	19	0.000971124	5.13809e+06	26.79
	FALSE	High	Mascot (A6)	[K].TLVPATETIK.[N]		1	5	Q61207	K3W4L3; Q8BFQ1; J3QPG5; Q61207; E9PZ00	0	2	0.975	0	1	1	536.816	1072.62	0.07	4e-05	3.0548e+06	HCD (High Energy Collision Dissociation)	MS2	9.23712	24.593	32.1226	10376	A001.raw	7/72		40	33	18	0.00103231	1.26746e+07	32.18
	FALSE	High	Mascot (A6)	[K].TLVPATETIK.[N]		1	5	Q61207	K3W4L3; Q8BFQ1; J3QPG5; Q61207; E9PZ00	0	2	0.9737	0	1	1	536.817	1072.63	1.21	0.00065	6312344	HCD (High Energy Collision Dissociation)	MS2	16.3449	12.702	32.8061	10706	A001.raw	7/72		38	33	18	0.0013546	2.04722e+07	32.8
	FALSE	High	Mascot (A6)	[K].LVSDVQTAVK.[T]		1	5	Q61207	K3W4L3; Q8BFQ1; J3QPG5; Q61207; E9PZ00	0	2	1	0	1	1	530.307	1059.61	2.5	0.00133	405823	HCD (High Energy Collision Dissociation)	MS2	36.7	80	25.7831	7394	A001.raw	9/88		35	34	19	0.00305609
FALSE	Master Protein	P18242	Cathepsin D OS=Mus musculus OX=10090 GN=Ctsd PE=1 SV=1	44.878	13	57	0	1	410	44.9	7.15	High		High	0	121.34	12	High	0	1002	10
	Checked	Confidence	Identifying Node	Annotated Sequence	Modifications	# Protein Groups	# Proteins	Master Protein Accessions	Protein Accessions	# Missed Cleavages	Charge	DeltaScore	DeltaCn	Rank	Search Engine Rank	m/z [Da]	MH+ [Da]	DeltaM [ppm]	Deltam/z [Da]	Intensity	Activation Type	MS Order	Isolation Interference [%]	Ion Inject Time [ms]	RT [min]	First Scan	Spectrum File	Ions Matched	XCorr	Ions Score	Identity Strict	Identity Relaxed	Expectation Value	Area	Apex RT [min]
	FALSE	High	Sequest HT (A2)	[K].GGcEAIVDTGTSLLVGPVEEVKELQK.[A]	C3(Carbamidomethyl)	1	1	P18242	P18242	1	3	0.8121	0	1	1	910.141	2728.41	0.53	0.00048	1.72922e+06	HCD (High Energy Collision Dissociation)	MS2	2.42928	80	60.366	24249	A001.raw	0/0	6.92					2.01335e+07	60.38
	FALSE	High	Sequest HT (A2)	[K].GGcEAIVDTGTSLLVGPVEEVKELQK.[A]	C3(Carbamidomethyl)	1	1	P18242	P18242	1	3	0.7947	0	1	1	910.141	2728.41	-0.01	-1e-05	2.01599e+06	HCD (High Energy Collision Dissociation)	MS2	1.96158	80	61.076	24595	A001.raw	0/0	6.82					2.25937e+07	61.03
	FALSE	High	Sequest HT (A2)	[K].GGcEAIVDTGTSLLVGPVEEVKELQK.[A]	C3(Carbamidomethyl)	1	1	P18242	P18242	1	3	0.7903	0	1	1	910.14	2728.41	-0.41	-0.00037	3.02952e+06	HCD (High Energy Collision Dissociation)	MS2	1.94303	80	60.7182	24420	A001.raw	0/0	6.39					17570282	60.77
	FALSE	High	Sequest HT (A2)	[K].GGcEAIVDTGTSLLVGPVEEVKELQK.[A]	C3(Carbamidomethyl)	1	1	P18242	P18242	1	3	0.8004	0	1	1	910.141	2728.41	0.06	6e-05	814648	HCD (High Energy Collision Dissociation)	MS2	3.10128	80	61.4223	24764	A001.raw	0/0	5.71					8.07452e+06	61.38
	FALSE	High	Sequest HT (A2)	[K].QIFGEATKQPGIVFVAAK.[F]		1	1	P18242	P18242	1	2	0.7341	0	1	1	952.536	1904.06	-0.13	-0.00012	961115	HCD (High Energy Collision Dissociation)	MS2	0	80	46.6944	17496	A001.raw	0/0	5.04
	FALSE	High	Sequest HT (A2)	[R].TMTEVGGSVEDLILK.[G]		1	1	P18242	P18242	0	2	0.8099	0	1	1	796.418	1591.83	2.46	0.00196	853710	HCD (High Energy Collision Dissociation)	MS2	6.81946	80	53.8724	21032	A001.raw	0/0	4.63					3.02181e+06	53.89
	FALSE	High	Sequest HT (A2)	[R].TMTEVGGSVEDLILK.[G]		1	1	P18242	P18242	0	2	0.7566	0	1	1	796.416	1591.83	0.23	0.00019	1.81506e+06	HCD (High Energy Collision Dissociation)	MS2	0	59.207	53.1736	20685	A001.raw	0/0	4.56					2.61986e+07	53.3
	FALSE	High	Sequest HT (A2)	[R].TMTEVGGSVEDLILKGPITK.[Y]		1	1	P18242	P18242	1	3	0.68	0	1	1	696.711	2088.12	-2.94	-0.00205	404054	HCD (High Energy Collision Dissociation)	MS2	73.1926	80	56.137	22162	A001.raw	0/0	4.5					2.54637e+06	56.16
	FALSE	High	Sequest HT (A2)	[K].QIFGEATKQPGIVFVAAK.[F]		1	1	P18242	P18242	1	2	0.7039	0	1	1	952.536	1904.07	0.84	0.0008	434670	HCD (High Energy Collision Dissociation)	MS2	0	80	46.3027	17303	A001.raw	0/0	4.39					3597709	46.36
	FALSE	High	Sequest HT (A2)	[K].AIGAVPLIQGEYMIPcEK.[V]	C16(Carbamidomethyl)	1	1	P18242	P18242	0	2	0.7383	0	1	1	995.011	1989.02	-1.61	-0.0016	1.89185e+06	HCD (High Energy Collision Dissociation)	MS2	0	80	55.27	21726	A001.raw	0/0	4.28					7.46774e+06	55.27
	FALSE	High	Sequest HT (A2)	[K].AIGAVPLIQGEYMIPcEK.[V]	C16(Carbamidomethyl)	1	1	P18242	P18242	0	2	0.7754	0	1	1	995.011	1989.02	-1.42	-0.00142	4190933	HCD (High Energy Collision Dissociation)	MS2	0	80	54.9178	21550	A001.raw	0/0	4.14					7.91573e+07	54.95
	FALSE	High	Sequest HT (A2)	[K].FDGILGMGYPHISVNNVLPVFDNLMQQK.[L]		1	1	P18242	P18242	0	3	0.6259	0	1	1	1049.53	3146.58	-0.66	-0.00069	595140	HCD (High Energy Collision Dissociation)	MS2	0	80	74.3138	30940	A001.raw	0/0	4.01					2.27669e+07	74.24
	FALSE	High	Sequest HT (A2)	[K].NIFSFYLNRDPEGQPGGELMLGGTDSK.[Y]		1	1	P18242	P18242	1	3	0.7929	0	1	1	981.471	2942.4	0.29	0.00029	166544	HCD (High Energy Collision Dissociation)	MS2	10.2474	80	60.9793	24549	A001.raw	0/0	3.96					4.25615e+06	60.96
	FALSE	High	Sequest HT (A2)	[K].NYELHPDKYILK.[AV]		1	1	P18242	P18242	1	2	0.6693	0	1	1	766.908	1532.81	-1.86	-0.00142	582987	HCD (High Energy Collision Dissociation)	MS2	42.1762	80	37.1985	12832	A001.raw	0/0	3.87					3.73216e+06	37.21
	FALSE	High	Sequest HT (A2)	[R].TMTEVGGSVEDLILK.[G]		1	1	P18242	P18242	0	2	0.8059	0	1	1	796.416	1591.83	0.46	0.00037	3.53541e+06	HCD (High Energy Collision Dissociation)	MS2	3.52825	46.87	53.5266	20860	A001.raw	0/0	3.76					27581832	53.59
	FALSE	High	Sequest HT (A2)	[K].NYELHPDKYILK.[AV]		1	1	P18242	P18242	1	2	0.6753	0	1	1	766.911	1532.81	1.97	0.00151	453571	HCD (High Energy Collision Dissociation)	MS2	44.003	80	37.5478	13005	A001.raw	0/0	3.48
	FALSE	High	Sequest HT (A2)	[K].NYELHPDKYILK.[AV]		1	1	P18242	P18242	1	2	0.6806	0	1	1	766.908	1532.81	-0.82	-0.00063	819944	HCD (High Energy Collision Dissociation)	MS2	33.5265	80	36.8425	12660	A001.raw	0/0	3.35					2.66619e+06	36.84
	FALSE	High	Sequest HT (A2)	[K].ILDIAcWVHHK.[Y]	C6(Carbamidomethyl)	1	1	P18242	P18242	0	3	0.6603	0	1	1	464.58	1391.73	0.77	0.00036	2.15328e+06	HCD (High Energy Collision Dissociation)	MS2	24.1182	31.584	45.8047	17053	A001.raw	0/0	3.15
	FALSE	High	Sequest HT (A2)	[K].FDGILGMGYPHISVNNVLPVFDNLMQQK.[L]		1	1	P18242	P18242	0	3	0.6369	0	1	1	1049.53	3146.58	-0.54	-0.00057	219280	HCD (High Energy Collision Dissociation)	MS2	0	80	74.6639	31106	A001.raw	0/0	3.14
	FALSE	High	Sequest HT (A2)	[K].ILDIAcWVHHK.[Y]	C6(Carbamidomethyl)	1	1	P18242	P18242	0	3	0.7203	0	1	1	464.58	1391.73	1.03	0.00048	9225902	HCD (High Energy Collision Dissociation)	MS2	3.07373	7.788	45.4476	16873	A001.raw	0/0	3.11					3.5239e+07	45.55
	FALSE	High	Sequest HT (A2)	[K].AIGAVPLIQGEYMIPcEK.[V]	C16(Carbamidomethyl)	1	1	P18242	P18242	0	2	0.7172	0	1	1	995.01	1989.01	-2.71	-0.0027	582951	HCD (High Energy Collision Dissociation)	MS2	0	80	54.5751	21380	A001.raw	0/0	2.97					1.60249e+06	54.56
	FALSE	High	Sequest HT (A2)	[K].ILDIAcWVHHK.[Y]	C6(Carbamidomethyl)	1	1	P18242	P18242	0	2	0.6738	0	1	1	696.366	1391.72	-1.04	-0.00072	823770	HCD (High Energy Collision Dissociation)	MS2	46.5073	80	45.211	16755	A001.raw	0/0	2.79					6.05961e+06	45.24
	FALSE	High	Sequest HT (A2)	[K].AIGAVPLIQGEYMIPcEK.[V]	C16(Carbamidomethyl)	1	1	P18242	P18242	0	2	0.7216	0	1	1	995.011	1989.02	-1.36	-0.00135	447560	HCD (High Energy Collision Dissociation)	MS2	30.8684	80	55.6269	21905	A001.raw	0/0	2.73
	FALSE	High	Sequest HT (A2)	[R].TMTEVGGSVEDLILK.[G]		1	1	P18242	P18242	0	2	0.7222	0	1	1	796.419	1591.83	3.68	0.00293	428070	HCD (High Energy Collision Dissociation)	MS2	0	80	52.8173	20511	A001.raw	0/0	2.7					1.71528e+06	52.76
	FALSE	High	Sequest HT (A2)	[K].VSSLPTVYLK.[L]		1	1	P18242	P18242	0	2	0.8134	0	1	1	553.828	1106.65	2.29	0.00127	4778039	HCD (High Energy Collision Dissociation)	MS2	0	20.55	41.4414	14916	A001.raw	0/0	2.68					5.1047e+06	41.41
	FALSE	High	Sequest HT (A2)	[K].VSSLPTVYLK.[L]		1	1	P18242	P18242	0	2	0.8158	0	1	1	553.827	1106.65	1.85	0.00102	17718354	HCD (High Energy Collision Dissociation)	MS2	4.74474	5.017	41.7877	15084	A001.raw	0/0	2.66					1.25899e+08	41.7
	FALSE	High	Sequest HT (A2)	[K].VSSLPTVYLK.[L]		1	1	P18242	P18242	0	2	0.7521	0	1	1	553.827	1106.65	0.63	0.00035	3.12249e+06	HCD (High Energy Collision Dissociation)	MS2	18.4478	35.567	42.1296	15249	A001.raw	0/0	2.34					6.32662e+06	42.13
	FALSE	High	Sequest HT (A2)	[K].TTEPVSELLK.[N]		1	1	P18242	P18242	0	2	0.7229	0	1	1	558.811	1116.61	0.1	6e-05	8.07981e+06	HCD (High Energy Collision Dissociation)	MS2	2.69003	9.336	38.7641	13595	A001.raw	0/0	2.31					3.21155e+07	38.63
	FALSE	High	Sequest HT (A2)	[K].TTEPVSELLK.[N]		1	1	P18242	P18242	0	2	0.6991	0	1	1	558.811	1116.62	0.65	0.00036	2.06016e+06	HCD (High Energy Collision Dissociation)	MS2	19.3533	35.494	38.4187	13425	A001.raw	0/0	2.26
	FALSE	High	Sequest HT (A2)	[K].TTEPVSELLK.[N]		1	1	P18242	P18242	0	2	0.6071	0	1	1	558.811	1116.62	0.65	0.00036	6225135	HCD (High Energy Collision Dissociation)	MS2	0.797021	13.901	39.1015	13763	A001.raw	0/0	2.24					1.98822e+07	39.16
	FALSE	High	Sequest HT (A2)	[K].QPGIVFVAAK.[F]		1	1	P18242	P18242	0	2	0.7215	0	1	1	515.308	1029.61	0.39	0.0002	4233364	HCD (High Energy Collision Dissociation)	MS2	28.0788	20.504	37.7323	13094	A001.raw	0/0	2.19					8.3191e+06	37.7
	FALSE	High	Sequest HT (A2)	[K].TTEPVSELLK.[N]		1	1	P18242	P18242	0	2	0.6912	0	1	1	558.811	1116.61	0.21	0.00012	2164957	HCD (High Energy Collision Dissociation)	MS2	14.2749	35.755	39.451	13938	A001.raw	0/0	2.17					3.96751e+06	39.48
	FALSE	High	Sequest HT (A2)	[K].QPGIVFVAAK.[F]		1	1	P18242	P18242	0	2	0.566	0	1	1	515.307	1029.61	-1.51	-0.00078	1.53601e+06	HCD (High Energy Collision Dissociation)	MS2	28.8127	80	38.0836	13260	A001.raw	0/0	2.12					4.72711e+06	38.01
	FALSE	High	Mascot (A6)	[K].QIFGEATKQPGIVFVAAK.[F]		1	3	P18242	F6Y6L6; P18242; F8WIR1	1	2	1	0	1	1	952.536	1904.06	-0.13	-0.00012	961115	HCD (High Energy Collision Dissociation)	MS2	0	80	46.6944	17496	A001.raw	13/204		82	31	16	3.58221e-08
	FALSE	High	Mascot (A6)	[K].QIFGEATKQPGIVFVAAK.[F]		1	3	P18242	F6Y6L6; P18242; F8WIR1	1	2	1	0	1	1	952.536	1904.07	0.84	0.0008	434670	HCD (High Energy Collision Dissociation)	MS2	0	80	46.3027	17303	A001.raw	11/204		81	31	16	4.33179e-08	3597709	46.36
	FALSE	High	Mascot (A6)	[R].TMTEVGGSVEDLILK.[G]		1	2	P18242	P18242; F8WIR1	0	2	1	0	1	1	796.416	1591.83	0.46	0.00037	3.53541e+06	HCD (High Energy Collision Dissociation)	MS2	3.52825	46.87	53.5266	20860	A001.raw	13/112		77	36	20	3.10951e-07	27581832	53.59
	FALSE	High	Mascot (A6)	[R].TMTEVGGSVEDLILK.[G]		1	2	P18242	P18242; F8WIR1	0	2	1	0	1	1	796.416	1591.83	0.23	0.00019	1.81506e+06	HCD (High Energy Collision Dissociation)	MS2	0	59.207	53.1736	20685	A001.raw	13/112		75	36	20	4.73601e-07	2.61986e+07	53.3
	FALSE	High	Mascot (A6)	[K].GGcEAIVDTGTSLLVGPVEEVKELQK.[A]	C3(Carbamidomethyl)	1	2	P18242	F6Y6L6; P18242	1	3	1	0	1	1	910.141	2728.41	-0.01	-1e-05	2.01599e+06	HCD (High Energy Collision Dissociation)	MS2	1.96158	80	61.076	24595	A001.raw	17/216		71	35	20	1.15302e-06	2.25937e+07	61.03
	FALSE	High	Mascot (A6)	[K].VSSLPTVYLK.[L]		1	2	P18242	F6Y6L6; P18242	0	2	1	0	1	1	553.828	1106.65	2.29	0.00127	4778039	HCD (High Energy Collision Dissociation)	MS2	0	20.55	41.4414	14916	A001.raw	7/72		71	30	15	3.57647e-07	5.1047e+06	41.41
	FALSE	High	Mascot (A6)	[R].TMTEVGGSVEDLILK.[G]		1	2	P18242	P18242; F8WIR1	0	2	1	0	1	1	796.418	1591.83	2.46	0.00196	853710	HCD (High Energy Collision Dissociation)	MS2	6.81946	80	53.8724	21032	A001.raw	11/112		61	35	20	1.18154e-05	3.02181e+06	53.89
	FALSE	High	Mascot (A6)	[K].GGcEAIVDTGTSLLVGPVEEVKELQK.[A]	C3(Carbamidomethyl)	1	2	P18242	F6Y6L6; P18242	1	3	1	0	1	1	910.14	2728.41	-0.41	-0.00037	3.02952e+06	HCD (High Energy Collision Dissociation)	MS2	1.94303	80	60.7182	24420	A001.raw	21/216		60	35	20	1.47012e-05	17570282	60.77
	FALSE	High	Mascot (A6)	[K].ILDIAcWVHHK.[Y]	C6(Carbamidomethyl)	1	2	P18242	P18242; F8WIR1	0	2	1	0	1	1	696.366	1391.72	-1.04	-0.00072	823770	HCD (High Energy Collision Dissociation)	MS2	46.5073	80	45.211	16755	A001.raw	7/80		60	36	21	1.79965e-05	6.05961e+06	45.24
	FALSE	High	Mascot (A6)	[K].FDGILGMGYPHISVNNVLPVFDNLMQQK.[L]		1	3	P18242	F6Y6L6; P18242; F8WIR1	0	3	1	0	1	1	1049.53	3146.58	-0.66	-0.00069	595140	HCD (High Energy Collision Dissociation)	MS2	0	80	74.3138	30940	A001.raw	29/268		57	37	21	4.16901e-05	2.27669e+07	74.24
	FALSE	High	Mascot (A6)	[K].GGcEAIVDTGTSLLVGPVEEVKELQK.[A]	C3(Carbamidomethyl)	1	2	P18242	F6Y6L6; P18242	1	3	1	0	1	1	910.141	2728.41	0.53	0.00048	1.72922e+06	HCD (High Energy Collision Dissociation)	MS2	2.42928	80	60.366	24249	A001.raw	15/216		56	35	20	3.66326e-05	2.01335e+07	60.38
	FALSE	High	Mascot (A6)	[K].AIGAVPLIQGEYMIPcEK.[V]	C16(Carbamidomethyl)	1	2	P18242	F6Y6L6; P18242	0	2	1	0	1	1	995.011	1989.02	-1.42	-0.00142	4190933	HCD (High Energy Collision Dissociation)	MS2	0	80	54.9178	21550	A001.raw	10/172		52	36	21	0.000112996	7.91573e+07	54.95
	FALSE	High	Mascot (A6)	[K].VSSLPTVYLK.[L]		1	2	P18242	F6Y6L6; P18242	0	2	1	0	1	1	553.827	1106.65	1.85	0.00102	17718354	HCD (High Energy Collision Dissociation)	MS2	4.74474	5.017	41.7877	15084	A001.raw	9/72		49	30	15	4.85723e-05	1.25899e+08	41.7
	FALSE	High	Mascot (A6)	[K].AIGAVPLIQGEYMIPcEK.[V]	C16(Carbamidomethyl)	1	2	P18242	F6Y6L6; P18242	0	2	1	0	1	1	995.01	1989.01	-2.71	-0.0027	582951	HCD (High Energy Collision Dissociation)	MS2	0	80	54.5751	21380	A001.raw	9/172		49	36	21	0.000236924	1.60249e+06	54.56
	FALSE	High	Mascot (A6)	[K].VSSLPTVYLK.[L]		1	2	P18242	F6Y6L6; P18242	0	2	1	0	1	1	553.827	1106.65	0.63	0.00035	3.12249e+06	HCD (High Energy Collision Dissociation)	MS2	18.4478	35.567	42.1296	15249	A001.raw	6/72		47	30	15	8.30594e-05	6.32662e+06	42.13
	FALSE	High	Mascot (A6)	[R].TMTEVGGSVEDLILK.[G]		1	2	P18242	P18242; F8WIR1	0	2	1	0	1	1	796.419	1591.83	3.68	0.00293	428070	HCD (High Energy Collision Dissociation)	MS2	0	80	52.8173	20511	A001.raw	11/112		46	35	20	0.000315827	1.71528e+06	52.76
	FALSE	High	Mascot (A6)	[K].ILDIAcWVHHK.[Y]	C6(Carbamidomethyl)	1	2	P18242	P18242; F8WIR1	0	3	1	0	1	1	464.58	1391.73	1.03	0.00048	9225902	HCD (High Energy Collision Dissociation)	MS2	3.07373	7.788	45.4476	16873	A001.raw	7/80		45	35	20	0.000438204	3.5239e+07	45.55
	FALSE	High	Mascot (A6)	[K].TTEPVSELLK.[N]		1	2	P18242	P18242; F8WIR1	0	2	0.9773	0	1	1	558.811	1116.61	0.1	6e-05	8.07981e+06	HCD (High Energy Collision Dissociation)	MS2	2.69003	9.336	38.7641	13595	A001.raw	8/72		44	35	20	0.000467293	3.21155e+07	38.63
	FALSE	High	Mascot (A6)	[K].ILDIAcWVHHK.[Y]	C6(Carbamidomethyl)	1	2	P18242	P18242; F8WIR1	0	3	1	0	1	1	464.58	1391.73	0.77	0.00036	2.15328e+06	HCD (High Energy Collision Dissociation)	MS2	24.1182	31.584	45.8047	17053	A001.raw	6/80		41	36	21	0.00121298
	FALSE	High	Mascot (A6)	[K].NYELHPDKYILK.[AV]		1	2	P18242	F6Y6L6; P18242	1	2	1	0	1	1	766.908	1532.81	-1.86	-0.00142	582987	HCD (High Energy Collision Dissociation)	MS2	42.1762	80	37.1985	12832	A001.raw	15/132		41	35	19	0.000972546	3.73216e+06	37.21
	FALSE	High	Mascot (A6)	[K].NYELHPDKYILK.[AV]		1	2	P18242	F6Y6L6; P18242	1	2	1	0	1	1	766.911	1532.81	1.97	0.00151	453571	HCD (High Energy Collision Dissociation)	MS2	44.003	80	37.5478	13005	A001.raw	8/132		37	35	20	0.00294995
	FALSE	High	Mascot (A6)	[K].AIGAVPLIQGEYMIPcEK.[V]	C16(Carbamidomethyl)	1	2	P18242	F6Y6L6; P18242	0	2	1	0	1	1	995.011	1989.02	-1.61	-0.0016	1.89185e+06	HCD (High Energy Collision Dissociation)	MS2	0	80	55.27	21726	A001.raw	11/172		36	36	21	0.00438166	7.46774e+06	55.27
	FALSE	High	Mascot (A6)	[K].LVDKNIFSFYLNR.[D]		1	3	P18242	F6Y6L6; P18242; F8WIR1	1	3	1	0	1	1	543.632	1628.88	0.44	0.00024	188619	HCD (High Energy Collision Dissociation)	MS2	0	80	54.7296	21457	A001.raw	5/132		34	34	19	0.00430886	2.82313e+06	54.65
	FALSE	High	Mascot (A6)	[K].VSSLPTVYLK.[L]		1	2	P18242	F6Y6L6; P18242	0	2	1	0	1	1	553.826	1106.64	-1.24	-0.00069	375784	HCD (High Energy Collision Dissociation)	MS2	33.9684	80	41.0993	14748	A001.raw	8/72		31	30	15	0.00393055	360511	41.1
FALSE	Master Protein	Q07797	Galectin-3-binding protein OS=Mus musculus OX=10090 GN=Lgals3bp PE=1 SV=1	42.9809	18	139	11	1	577	64.5	5.14	High		High	0	340.14	18	High	0	3920	18
	Checked	Confidence	Identifying Node	Annotated Sequence	Modifications	# Protein Groups	# Proteins	Master Protein Accessions	Protein Accessions	# Missed Cleavages	Charge	DeltaScore	DeltaCn	Rank	Search Engine Rank	m/z [Da]	MH+ [Da]	DeltaM [ppm]	Deltam/z [Da]	Intensity	Activation Type	MS Order	Isolation Interference [%]	Ion Inject Time [ms]	RT [min]	First Scan	Spectrum File	Ions Matched	XCorr	Ions Score	Identity Strict	Identity Relaxed	Expectation Value	Area	Apex RT [min]
	FALSE	High	Sequest HT (A2)	[R].GRWGTVcDNLWNLLDAHVVcR.[A]	C7(Carbamidomethyl); C20(Carbamidomethyl)	1	1	Q07797	Q07797	1	3	0.8516	0	1	1	847.745	2541.22	-1.25	-0.00106	666126	HCD (High Energy Collision Dissociation)	MS2	2.02483	80	63.7315	25879	A001.raw	0/0	7.95					8.56976e+06	63.85
	FALSE	High	Sequest HT (A2)	[R].AAFGPGKGPIMLDEVEcTGTESSLAScR.[S]	C17(Carbamidomethyl); C27(Carbamidomethyl)	1	1	Q07797	Q07797	1	3	0.8587	0	1	1	980.788	2940.35	-1.76	-0.00173	4.15689e+06	HCD (High Energy Collision Dissociation)	MS2	0	36.864	49.5277	18893	A001.raw	0/0	7.5					5.01505e+07	49.5
	FALSE	High	Sequest HT (A2)	[R].AAFGPGKGPIMLDEVEcTGTESSLAScR.[S]	C17(Carbamidomethyl); C27(Carbamidomethyl)	1	1	Q07797	Q07797	1	3	0.861	0	1	1	980.789	2940.35	-0.27	-0.00026	2.63836e+06	HCD (High Energy Collision Dissociation)	MS2	0	79.36	49.8869	19070	A001.raw	0/0	7.48					2.48149e+07	49.76
	FALSE	High	Sequest HT (A2)	[R].GRWGTVcDNLWNLLDAHVVcR.[A]	C7(Carbamidomethyl); C20(Carbamidomethyl)	1	1	Q07797	Q07797	1	3	0.8342	0	1	1	847.745	2541.22	-1.18	-0.001	1.4469e+06	HCD (High Energy Collision Dissociation)	MS2	4.33446	80	63.3673	25703	A001.raw	0/0	7.3					5.18542e+06	63.34
	FALSE	High	Sequest HT (A2)	[R].AAFGPGKGPIMLDEVEcTGTESSLAScR.[S]	C17(Carbamidomethyl); C27(Carbamidomethyl)	1	1	Q07797	Q07797	1	3	0.8542	0	1	1	980.789	2940.35	-0.77	-0.00075	1.17779e+06	HCD (High Energy Collision Dissociation)	MS2	0	80	50.2351	19237	A001.raw	0/0	7.27					8.54508e+06	50.19
	FALSE	High	Sequest HT (A2)	[R].GRWGTVcDNLWNLLDAHVVcR.[A]	C7(Carbamidomethyl); C20(Carbamidomethyl)	1	1	Q07797	Q07797	1	4	0.7899	0	1	1	636.061	2541.22	-0.29	-0.00019	3.59225e+06	HCD (High Energy Collision Dissociation)	MS2	9.47461	52.53	63.3899	25714	A001.raw	0/0	6.76					3.93367e+07	63.38
	FALSE	High	Sequest HT (A2)	[K].TMQALEFHTVPVEVLAK.[Y]		1	1	Q07797	Q07797	0	2	0.7931	0	1	1	957.013	1913.02	-0.65	-0.00062	1.72366e+06	HCD (High Energy Collision Dissociation)	MS2	43.1304	80	51.6324	19928	A001.raw	0/0	6.62					1.87336e+07	51.68
	FALSE	High	Sequest HT (A2)	[K].AVDQWSTETIASHEDIER.[L]		1	1	Q07797	Q07797	0	3	0.8142	0	1	1	696.326	2086.96	-2.18	-0.00152	2.09521e+06	HCD (High Energy Collision Dissociation)	MS2	2.15103	80	40.3477	14378	A001.raw	0/0	6.35					1.97714e+07	40.41
	FALSE	High	Sequest HT (A2)	[K].AVDQWSTETIASHEDIER.[L]		1	1	Q07797	Q07797	0	3	0.8309	0	1	1	696.328	2086.97	0.36	0.00025	4545141	HCD (High Energy Collision Dissociation)	MS2	0.578603	26.855	39.6493	14037	A001.raw	0/0	6.21					5.90819e+06	39.68
	FALSE	High	Sequest HT (A2)	[R].KTMQALEFHTVPVEVLAK.[Y]		1	1	Q07797	Q07797	1	3	0.835	0	1	1	681.045	2041.12	2.88	0.00196	2.25839e+06	HCD (High Energy Collision Dissociation)	MS2	16.441	34.567	47.1987	17746	A001.raw	0/0	6.18					5770515	47.31
	FALSE	High	Sequest HT (A2)	[R].GRWGTVcDNLWNLLDAHVVcR.[A]	C7(Carbamidomethyl); C20(Carbamidomethyl)	1	1	Q07797	Q07797	1	4	0.743	0	1	1	636.061	2541.22	0.09	6e-05	429396	HCD (High Energy Collision Dissociation)	MS2	41.2803	80	63.0284	25540	A001.raw	0/0	6.03					1.50143e+06	63.08
	FALSE	High	Sequest HT (A2)	[R].WGTVcDNLWNLLDAHVVcR.[A]	C5(Carbamidomethyl); C18(Carbamidomethyl)	1	1	Q07797	Q07797	0	3	0.7058	0	1	1	776.706	2328.1	0.4	0.00031	9285038	HCD (High Energy Collision Dissociation)	MS2	0.0352907	32.623	66.4512	27190	A001.raw	0/0	5.88					3.52594e+08	66.55
	FALSE	High	Sequest HT (A2)	[R].WGTVcDNLWNLLDAHVVcR.[A]	C5(Carbamidomethyl); C18(Carbamidomethyl)	1	1	Q07797	Q07797	0	3	0.7062	0	1	1	776.705	2328.1	-0.31	-0.00024	5262645	HCD (High Energy Collision Dissociation)	MS2	0.7953	51.927	66.7972	27355	A001.raw	0/0	5.82
	FALSE	High	Sequest HT (A2)	[R].GRWGTVcDNLWNLLDAHVVcR.[A]	C7(Carbamidomethyl); C20(Carbamidomethyl)	1	1	Q07797	Q07797	1	3	0.8083	0	1	1	847.745	2541.22	-1.61	-0.00136	211215	HCD (High Energy Collision Dissociation)	MS2	39.7655	80	63.0056	25529	A001.raw	0/0	5.79					2.766e+06	63.06
	FALSE	High	Sequest HT (A2)	[K].AVDQWSTETIASHEDIER.[L]		1	1	Q07797	Q07797	0	3	0.8232	0	1	1	696.327	2086.97	-0.69	-0.00048	5268963	HCD (High Energy Collision Dissociation)	MS2	3.75099	19.348	40.0051	14211	A001.raw	0/0	5.77					2.69392e+07	40.04
	FALSE	High	Sequest HT (A2)	[K].AVDQWSTETIASHEDIER.[L]		1	1	Q07797	Q07797	0	2	0.843	0	1	1	1043.99	2086.97	-0.95	-0.00099	578031	HCD (High Energy Collision Dissociation)	MS2	8.2233	80	39.6327	14029	A001.raw	0/0	5.67					1.82623e+06	39.65
	FALSE	High	Sequest HT (A2)	[R].TNPEAQALWQVVGSSVIMR.[V]		1	1	Q07797	Q07797	0	2	0.7425	0	1	1	1043.54	2086.07	-1.4	-0.00146	2.24422e+06	HCD (High Energy Collision Dissociation)	MS2	0	80	64.6828	26339	A001.raw	0/0	5.67					5.00467e+07	64.68
	FALSE	High	Sequest HT (A2)	[K].AVDQWSTETIASHEDIER.[L]		1	1	Q07797	Q07797	0	3	0.7823	0	1	1	696.328	2086.97	0.71	0.0005	670507	HCD (High Energy Collision Dissociation)	MS2	6.60433	80	40.7124	14558	A001.raw	0/0	5.65					880509	40.68
	FALSE	High	Sequest HT (A2)	[R].GRWGTVcDNLWNLLDAHVVcR.[A]	C7(Carbamidomethyl); C20(Carbamidomethyl)	1	1	Q07797	Q07797	1	4	0.8094	0	1	1	636.062	2541.22	0.38	0.00024	2.42606e+06	HCD (High Energy Collision Dissociation)	MS2	8.01157	80	63.7526	25889	A001.raw	0/0	5.56					2.82663e+07	63.69
	FALSE	High	Sequest HT (A2)	[K].GPIMLDEVEcTGTESSLAScR.[S]	C10(Carbamidomethyl); C20(Carbamidomethyl)	1	1	Q07797	Q07797	0	2	0.8631	0	1	1	1156.51	2312.02	-1.48	-0.00171	506239	HCD (High Energy Collision Dissociation)	MS2	0	80	47.3477	17820	A001.raw	0/0	5.48					9293744	47.42
	FALSE	High	Sequest HT (A2)	[K].AVDQWSTETIASHEDIER.[L]		1	1	Q07797	Q07797	0	3	0.7692	0	1	1	696.328	2086.97	0.8	0.00056	579918	HCD (High Energy Collision Dissociation)	MS2	17.7472	80	39.2962	13863	A001.raw	0/0	5.46					2.84332e+06	39.34
	FALSE	High	Sequest HT (A2)	[R].YNSYQSFQTPQHPSFLFK.[D]		1	1	Q07797	Q07797	0	3	0.7841	0	1	1	740.355	2219.05	-1.78	-0.00132	2.71853e+06	HCD (High Energy Collision Dissociation)	MS2	8.10497	80	49.1561	18710	A001.raw	0/0	5.42					1.60109e+07	49.17
	FALSE	High	Sequest HT (A2)	[K].AVDQWSTETIASHEDIER.[L]		1	1	Q07797	Q07797	0	2	0.797	0	1	1	1043.99	2086.97	-0.83	-0.00087	876179	HCD (High Energy Collision Dissociation)	MS2	12.4261	80	39.9904	14204	A001.raw	0/0	5.42					3.95223e+06	40
	FALSE	High	Sequest HT (A2)	[K].LASAYGATELQDYcGR.[L]	C14(Carbamidomethyl)	1	1	Q07797	Q07797	0	2	0.8115	0	1	1	887.906	1774.8	-0.91	-0.00081	3.70241e+06	HCD (High Energy Collision Dissociation)	MS2	0	80	38.4608	13446	A001.raw	0/0	5.41					1.52675e+07	38.52
	FALSE	High	Sequest HT (A2)	[R].YNSYQSFQTPQHPSFLFK.[D]		1	1	Q07797	Q07797	0	3	0.8037	0	1	1	740.356	2219.05	-1.54	-0.00114	4.17216e+06	HCD (High Energy Collision Dissociation)	MS2	4.30398	73.354	48.799	18535	A001.raw	0/0	5.4					4.57126e+07	48.73
	FALSE	High	Sequest HT (A2)	[K].SELAVSSELDLLKAVDQWSTETIASHEDIER.[L]		1	1	Q07797	Q07797	1	4	0.6841	0	1	1	868.682	3471.71	-1.83	-0.00159	181505	HCD (High Energy Collision Dissociation)	MS2	41.788	80	72.0942	29886	A001.raw	0/0	5.35					7.50925e+06	72
	FALSE	High	Sequest HT (A2)	[R].KTMQALEFHTVPVEVLAK.[Y]		1	1	Q07797	Q07797	1	3	0.7666	0	1	1	681.044	2041.12	0.55	0.00038	2.65847e+06	HCD (High Energy Collision Dissociation)	MS2	22.7373	23.661	46.8457	17571	A001.raw	0/0	5.27					8.44308e+07	46.9
	FALSE	High	Sequest HT (A2)	[R].WGTVcDNLWNLLDAHVVcR.[A]	C5(Carbamidomethyl); C18(Carbamidomethyl)	1	1	Q07797	Q07797	0	2	0.7795	0	1	1	1164.55	2328.1	-2.56	-0.00298	408406	HCD (High Energy Collision Dissociation)	MS2	0	80	66.6587	27289	A001.raw	0/0	5.08					1.48574e+07	66.54
	FALSE	High	Sequest HT (A2)	[K].LASAYGATELQDYcGR.[L]	C14(Carbamidomethyl)	1	1	Q07797	Q07797	0	2	0.8069	0	1	1	887.906	1774.8	-1.39	-0.00124	6.00171e+06	HCD (High Energy Collision Dissociation)	MS2	0	20.594	38.8094	13618	A001.raw	0/0	4.92					1.99097e+07	38.72
	FALSE	High	Sequest HT (A2)	[K].AVDQWSTETIASHEDIER.[L]		1	1	Q07797	Q07797	0	2	0.7684	0	1	1	1043.98	2086.96	-3.87	-0.00404	298081	HCD (High Energy Collision Dissociation)	MS2	0	80	40.3378	14374	A001.raw	0/0	4.88					1373083	40.36
	FALSE	High	Sequest HT (A2)	[R].TNPEAQALWQVVGSSVIMR.[V]		1	1	Q07797	Q07797	0	3	0.749	0	1	1	696.029	2086.07	-1.93	-0.00134	2.58538e+06	HCD (High Energy Collision Dissociation)	MS2	0	40.526	64.5013	26251	A001.raw	0/0	4.82					1.68472e+08	64.71
	FALSE	High	Sequest HT (A2)	[R].VLILcGGYSVVDVTSFEGSK.[A]	C5(Carbamidomethyl)	1	1	Q07797	Q07797	0	2	0.8133	0	1	1	1065.54	2130.08	-1.18	-0.00126	264856	HCD (High Energy Collision Dissociation)	MS2	0	80	57.2967	22740	A001.raw	0/0	4.82					1.20239e+07	57.36
	FALSE	High	Sequest HT (A2)	[K].LASAYGATELQDYcGR.[L]	C14(Carbamidomethyl)	1	1	Q07797	Q07797	0	2	0.825	0	1	1	887.906	1774.8	-1.32	-0.00117	2.42099e+06	HCD (High Energy Collision Dissociation)	MS2	4.2673	39.742	39.1672	13797	A001.raw	0/0	4.8					5.86329e+06	39.19
	FALSE	High	Sequest HT (A2)	[R].WGTVcDNLWNLLDAHVVcR.[A]	C5(Carbamidomethyl); C18(Carbamidomethyl)	1	1	Q07797	Q07797	0	2	0.792	0	1	1	1164.55	2328.1	-1.72	-0.002	94395.6	HCD (High Energy Collision Dissociation)	MS2	0	80	66.297	27117	A001.raw	0/0	4.76					461945	66.32
	FALSE	High	Sequest HT (A2)	[R].KTMQALEFHTVPVEVLAK.[Y]		1	1	Q07797	Q07797	1	2	0.8386	0	1	1	1021.06	2041.12	2.44	0.00249	486605	HCD (High Energy Collision Dissociation)	MS2	17.8041	80	46.9368	17617	A001.raw	0/0	4.71					8.19665e+06	46.92
	FALSE	High	Sequest HT (A2)	[R].GRWGTVcDNLWNLLDAHVVcR.[A]	C7(Carbamidomethyl); C20(Carbamidomethyl)	1	1	Q07797	Q07797	1	4	0.7787	0	1	1	636.062	2541.22	0.38	0.00024	457314	HCD (High Energy Collision Dissociation)	MS2	49.4093	80	64.094	26054	A001.raw	0/0	4.7					2.41352e+06	64.1
	FALSE	High	Sequest HT (A2)	[R].TNPEAQALWQVVGSSVIMR.[V]		1	1	Q07797	Q07797	0	2	0.7837	0	1	1	1043.54	2086.07	-3.5	-0.00366	776631	HCD (High Energy Collision Dissociation)	MS2	0	80	65.0523	26518	A001.raw	0/0	4.67
	FALSE	High	Sequest HT (A2)	[K].AVDQWSTETIASHEDIER.[L]		1	1	Q07797	Q07797	0	2	0.8505	0	1	1	1043.99	2086.97	1.04	0.00109	171122	HCD (High Energy Collision Dissociation)	MS2	0	80	39.2655	13848	A001.raw	0/0	4.55					3.63488e+06	39.31
	FALSE	High	Sequest HT (A2)	[R].LFATLLPQDPTFHTPLDLYAYAR.[A]		1	1	Q07797	Q07797	0	3	0.8238	0	1	1	888.467	2663.39	-0.57	-0.0005	3.88073e+06	HCD (High Energy Collision Dissociation)	MS2	0	80	67.3492	27619	A001.raw	0/0	4.54					2.65559e+07	67.26
	FALSE	High	Sequest HT (A2)	[R].YNSYQSFQTPQHPSFLFK.[D]		1	1	Q07797	Q07797	0	2	0.8237	0	1	1	1110.03	2219.05	-1.06	-0.00118	500063	HCD (High Energy Collision Dissociation)	MS2	31.5279	80	49.0961	18682	A001.raw	0/0	4.48					5.18966e+06	49.05
	FALSE	High	Sequest HT (A2)	[R].TNPEAQALWQVVGSSVIMR.[V]		1	1	Q07797	Q07797	0	3	0.7117	0	1	1	696.029	2086.07	-0.61	-0.00043	5.28152e+06	HCD (High Energy Collision Dissociation)	MS2	0	28.166	64.8421	26416	A001.raw	0/0	4.44					1.68472e+08	64.71
	FALSE	High	Sequest HT (A2)	[R].LFATLLPQDPTFHTPLDLYAYAR.[A]		1	1	Q07797	Q07797	0	3	0.7856	0	1	1	888.469	2663.39	2.39	0.00212	424861	HCD (High Energy Collision Dissociation)	MS2	5.4992	80	68.0401	27949	A001.raw	0/0	4.43					1.23637e+06	67.98
	FALSE	High	Sequest HT (A2)	[R].LYTSSTWSSLVMASTWR.[A]		1	1	Q07797	Q07797	0	2	0.825	0	1	1	988.48	1975.95	-2.87	-0.00283	588300	HCD (High Energy Collision Dissociation)	MS2	0	80	62.5276	25299	A001.raw	0/0	4.4					1.96038e+06	62.57
	FALSE	High	Sequest HT (A2)	[R].LFATLLPQDPTFHTPLDLYAYAR.[A]		1	1	Q07797	Q07797	0	3	0.8159	0	1	1	888.468	2663.39	0.53	0.00047	1.757e+06	HCD (High Energy Collision Dissociation)	MS2	0	80	67.6945	27784	A001.raw	0/0	4.4					1.36397e+07	67.56
	FALSE	High	Sequest HT (A2)	[K].LASAYGATELQDYcGR.[L]	C14(Carbamidomethyl)	1	1	Q07797	Q07797	0	2	0.8372	0	1	1	887.906	1774.8	-1.05	-0.00093	1.14294e+06	HCD (High Energy Collision Dissociation)	MS2	0	80	39.51	13967	A001.raw	0/0	4.3					3.19822e+06	39.49
	FALSE	High	Sequest HT (A2)	[R].TNPEAQALWQVVGSSVIMR.[V]		1	1	Q07797	Q07797	0	3	0.6822	0	1	1	696.03	2086.08	0.35	0.00024	859049	HCD (High Energy Collision Dissociation)	MS2	0	80	65.1821	26580	A001.raw	0/0	4.28					1.93977e+07	65.03
	FALSE	High	Sequest HT (A2)	[R].LFATLLPQDPTFHTPLDLYAYAR.[A]		1	1	Q07797	Q07797	0	3	0.7934	0	1	1	888.466	2663.38	-1.32	-0.00118	7211265	HCD (High Energy Collision Dissociation)	MS2	0	51.687	67.0041	27454	A001.raw	0/0	4.26					2.42259e+08	66.99
	FALSE	High	Sequest HT (A2)	[R].YNSYQSFQTPQHPSFLFK.[D]		1	1	Q07797	Q07797	0	3	0.7033	0	1	1	740.357	2219.06	-0.22	-0.00016	885409	HCD (High Energy Collision Dissociation)	MS2	14.898	80	48.4426	18360	A001.raw	0/0	4.18					8.20064e+06	48.42
	FALSE	High	Sequest HT (A2)	[R].LFATLLPQDPTFHTPLDLYAYAR.[A]		1	1	Q07797	Q07797	0	2	0.8	0	1	1	1332.2	2663.39	0.45	0.00059	336992	HCD (High Energy Collision Dissociation)	MS2	0	80	67.236	27565	A001.raw	0/0	4.15					2.03397e+06	67.25
	FALSE	High	Sequest HT (A2)	[R].YNQLYTYGYGSVAR.[Y]		1	1	Q07797	Q07797	0	2	0.6836	0	1	1	827.895	1654.78	-2.03	-0.00168	1.03888e+06	HCD (High Energy Collision Dissociation)	MS2	23.3894	80	40.9283	14664	A001.raw	0/0	4.14					3.61018e+06	40.96
	FALSE	High	Sequest HT (A2)	[K].SELAVSSELDLLKAVDQWSTETIASHEDIER.[L]		1	1	Q07797	Q07797	1	4	0.7586	0	1	1	868.688	3471.73	4.92	0.00427	15835.1	HCD (High Energy Collision Dissociation)	MS2	10.0833	80	71.7487	29722	A001.raw	0/0	4.06					6.91589e+06	71.9
	FALSE	High	Sequest HT (A2)	[R].YNSYQSFQTPQHPSFLFK.[D]		1	1	Q07797	Q07797	0	3	0.7327	0	1	1	740.357	2219.05	-0.3	-0.00022	742116	HCD (High Energy Collision Dissociation)	MS2	14.7598	80	49.5053	18882	A001.raw	0/0	4.04					2411956	49.38
	FALSE	High	Sequest HT (A2)	[R].LYTSSTWSSLVMASTWR.[A]		1	1	Q07797	Q07797	0	2	0.7736	0	1	1	988.481	1975.95	-1.63	-0.00161	424194	HCD (High Energy Collision Dissociation)	MS2	11.4463	80	62.8916	25474	A001.raw	0/0	4.02					1.32519e+06	62.81
	FALSE	High	Sequest HT (A2)	[R].YNQLYTYGYGSVAR.[Y]		1	1	Q07797	Q07797	0	2	0.6917	0	1	1	827.895	1654.78	-2.54	-0.00211	955860	HCD (High Energy Collision Dissociation)	MS2	27.5226	80	40.5651	14486	A001.raw	0/0	3.99					4.23828e+06	40.63
	FALSE	High	Sequest HT (A2)	[K].LASAYGATELQDYcGR.[L]	C14(Carbamidomethyl)	1	1	Q07797	Q07797	0	2	0.8031	0	1	1	887.905	1774.8	-2.56	-0.00227	453253	HCD (High Energy Collision Dissociation)	MS2	0	80	38.1094	13273	A001.raw	0/0	3.91					1.59387e+06	38.02
	FALSE	High	Sequest HT (A2)	[R].LFATLLPQDPTFHTPLDLYAYAR.[A]		1	1	Q07797	Q07797	0	2	0.7781	0	1	1	1332.2	2663.39	1.09	0.00145	202234	HCD (High Energy Collision Dissociation)	MS2	18.0644	80	67.5868	27733	A001.raw	0/0	3.74
	FALSE	High	Sequest HT (A2)	[R].LFATLLPQDPTFHTPLDLYAYAR.[A]		1	1	Q07797	Q07797	0	2	0.8778	0	1	1	1332.19	2663.38	-1.94	-0.00258	98669.8	HCD (High Energy Collision Dissociation)	MS2	0	80	66.8755	27393	A001.raw	0/0	3.6					1.58529e+07	66.93
	FALSE	High	Sequest HT (A2)	[K].SELAVSSELDLLK.[A]		1	1	Q07797	Q07797	0	2	0.5609	0	1	1	702.385	1403.76	-0.39	-0.00027	1599583	HCD (High Energy Collision Dissociation)	MS2	23.9008	59.205	53.1978	20697	A001.raw	0/0	3.53					1.3863e+07	53.24
	FALSE	High	Sequest HT (A2)	[R].YNQLYTYGYGSVAR.[Y]		1	1	Q07797	Q07797	0	2	0.6638	0	1	1	827.895	1654.78	-1.88	-0.00156	312286	HCD (High Energy Collision Dissociation)	MS2	26.6902	80	41.2862	14842	A001.raw	0/0	3.48					8.01754e+06	41.18
	FALSE	High	Sequest HT (A2)	[K].LASAYGATELQDYcGR.[L]	C14(Carbamidomethyl)	1	1	Q07797	Q07797	0	2	0.8029	0	1	1	887.904	1774.8	-3.46	-0.00307	430039	HCD (High Energy Collision Dissociation)	MS2	0	80	39.8712	14147	A001.raw	0/0	3.45					3.56042e+06	39.86
	FALSE	High	Sequest HT (A2)	[R].YNQLYTYGYGSVAR.[Y]		1	1	Q07797	Q07797	0	2	0.6395	0	1	1	827.895	1654.78	-2.4	-0.00198	432955	HCD (High Energy Collision Dissociation)	MS2	30.0126	80	40.2184	14317	A001.raw	0/0	3.44					3.9623e+06	40.19
	FALSE	High	Sequest HT (A2)	[K].TMQALEFHTVPVEVLAK.[Y]		1	1	Q07797	Q07797	0	3	0.67	0	1	1	638.345	1913.02	0.62	0.00039	4751609	HCD (High Energy Collision Dissociation)	MS2	40.1236	16.237	51.985	20103	A001.raw	0/0	3					4.05645e+07	51.89
	FALSE	High	Sequest HT (A2)	[R].TNPEAQALWQVVGSSVIMR.[V]		1	1	Q07797	Q07797	0	3	0.6228	0	1	1	696.029	2086.07	-1.84	-0.00128	436230	HCD (High Energy Collision Dissociation)	MS2	36.0289	80	65.5496	26757	A001.raw	0/0	2.89					4.45603e+06	65.58
	FALSE	High	Sequest HT (A2)	[R].VDAEcMPVVR.[D]	C5(Carbamidomethyl)	1	1	Q07797	Q07797	0	2	0.617	0	1	1	588.281	1175.55	-0.63	-0.00037	1.32875e+06	HCD (High Energy Collision Dissociation)	MS2	16.7405	80	31.4122	10053	A001.raw	0/0	2.82					8.10475e+06	31.44
	FALSE	High	Sequest HT (A2)	[R].TNPEAQALWQVVGSSVIMR.[V]		1	1	Q07797	Q07797	0	3	0.6893	0	1	1	696.028	2086.07	-2.98	-0.00207	281532	HCD (High Energy Collision Dissociation)	MS2	60.3246	80	64.1519	26083	A001.raw	0/0	2.8					1.10533e+06	64.14
	FALSE	High	Sequest HT (A2)	[K].APIPTALDTNSSK.[T]		1	1	Q07797	Q07797	0	2	0.8195	0	1	1	657.849	1314.69	-0.08	-5e-05	1.31072e+06	HCD (High Energy Collision Dissociation)	MS2	10.6106	80	31.4645	10079	A001.raw	0/0	2.77					6.7106e+06	31.44
	FALSE	High	Sequest HT (A2)	[R].YNSYQSFQTPQHPSFLFK.[D]		1	1	Q07797	Q07797	0	2	0.7319	0	1	1	1110.03	2219.05	-0.29	-0.00033	146952	HCD (High Energy Collision Dissociation)	MS2	27.9661	80	49.4526	18857	A001.raw	0/0	2.76					4.91673e+06	49.33
	FALSE	High	Sequest HT (A2)	[K].SELAVSSELDLLK.[A]		1	1	Q07797	Q07797	0	2	0.663	0	1	1	702.385	1403.76	0.57	0.0004	836947	HCD (High Energy Collision Dissociation)	MS2	26.4081	80	54.9042	21544	A001.raw	0/0	2.76					3.99752e+06	54.82
	FALSE	High	Sequest HT (A2)	[R].VDAEcMPVVR.[D]	C5(Carbamidomethyl)	1	1	Q07797	Q07797	0	2	0.6277	0	1	1	588.281	1175.56	0.51	0.0003	2608193	HCD (High Energy Collision Dissociation)	MS2	3.11683	31.037	32.1034	10367	A001.raw	0/0	2.74					8.38048e+06	32.06
	FALSE	High	Sequest HT (A2)	[R].VDAEcMPVVR.[D]	C5(Carbamidomethyl)	1	1	Q07797	Q07797	0	2	0.6023	0	1	1	588.281	1175.55	-0.11	-6e-05	3.51262e+06	HCD (High Energy Collision Dissociation)	MS2	4.11364	24.758	31.7634	10209	A001.raw	0/0	2.59					1.51731e+07	31.83
	FALSE	High	Sequest HT (A2)	[K].SELAVSSELDLLK.[A]		1	1	Q07797	Q07797	0	2	0.5957	0	1	1	702.386	1403.76	1.44	0.00101	220075	HCD (High Energy Collision Dissociation)	MS2	17.7598	80	58.9154	23537	A001.raw	0/0	2.3					1.06537e+06	58.88
	FALSE	High	Sequest HT (A2)	[R].KTMQALEFHTVPVEVLAK.[Y]		1	1	Q07797	Q07797	1	2	0.7548	0	1	1	1021.06	2041.11	-1.21	-0.00123	303105	HCD (High Energy Collision Dissociation)	MS2	0	80	47.3185	17807	A001.raw	0/0	2.08					3.86024e+06	47.24
	FALSE	High	Mascot (A6)	[K].GPIMLDEVEcTGTESSLAScR.[S]	C10(Carbamidomethyl); C20(Carbamidomethyl)	1	2	Q07797	E9Q5X5; Q07797	0	2	1	0	1	1	1156.51	2312.02	-1.48	-0.00171	506239	HCD (High Energy Collision Dissociation)	MS2	0	80	47.3477	17820	A001.raw	15/160		161	38	23	2.18305e-15	9293744	47.42
	FALSE	High	Mascot (A6)	[R].WGTVcDNLWNLLDAHVVcR.[A]	C5(Carbamidomethyl); C18(Carbamidomethyl)	1	2	Q07797	E9Q5X5; Q07797	0	2	1	0	1	1	1164.55	2328.1	-1.72	-0.002	94395.6	HCD (High Energy Collision Dissociation)	MS2	0	80	66.297	27117	A001.raw	14/192		130	38	23	3.07786e-12	461945	66.32
	FALSE	High	Mascot (A6)	[K].AVDQWSTETIASHEDIER.[L]		1	1	Q07797	Q07797	0	2	1	0	1	1	1043.99	2086.97	-0.95	-0.00099	578031	HCD (High Energy Collision Dissociation)	MS2	8.2233	80	39.6327	14029	A001.raw	13/192		124	38	23	1.03281e-11	1.82623e+06	39.65
	FALSE	High	Mascot (A6)	[R].LYTSSTWSSLVMASTWR.[A]		1	1	Q07797	Q07797	0	2	1	0	1	1	988.48	1975.95	-2.87	-0.00283	588300	HCD (High Energy Collision Dissociation)	MS2	0	80	62.5276	25299	A001.raw	12/128		119	38	23	3.36605e-11	1.96038e+06	62.57
	FALSE	High	Mascot (A6)	[R].TNPEAQALWQVVGSSVIMR.[V]		1	2	Q07797	E9Q5X5; Q07797	0	2	1	0	1	1	1043.54	2086.07	-1.4	-0.00146	2.24422e+06	HCD (High Energy Collision Dissociation)	MS2	0	80	64.6828	26339	A001.raw	17/212		117	36	21	3.87259e-11	5.00467e+07	64.68
	FALSE	High	Mascot (A6)	[R].WGTVcDNLWNLLDAHVVcR.[A]	C5(Carbamidomethyl); C18(Carbamidomethyl)	1	2	Q07797	E9Q5X5; Q07797	0	2	1	0	1	1	1164.55	2328.1	-2.56	-0.00298	408406	HCD (High Energy Collision Dissociation)	MS2	0	80	66.6587	27289	A001.raw	15/192		109	38	23	3.92584e-10	1.48574e+07	66.54
	FALSE	High	Mascot (A6)	[R].AAFGPGKGPIMLDEVEcTGTESSLAScR.[S]	C17(Carbamidomethyl); C27(Carbamidomethyl)	1	2	Q07797	E9Q5X5; Q07797	1	3	1	0	1	1	980.789	2940.35	-0.77	-0.00075	1.17779e+06	HCD (High Energy Collision Dissociation)	MS2	0	80	50.2351	19237	A001.raw	12/300		108	39	24	5.11793e-10	8.54508e+06	50.19
	FALSE	High	Mascot (A6)	[R].TNPEAQALWQVVGSSVIMR.[V]		1	2	Q07797	E9Q5X5; Q07797	0	2	1	0	1	1	1043.54	2086.07	-3.5	-0.00366	776631	HCD (High Energy Collision Dissociation)	MS2	0	80	65.0523	26518	A001.raw	16/212		106	36	21	4.55526e-10
	FALSE	High	Mascot (A6)	[K].AVDQWSTETIASHEDIER.[L]		1	1	Q07797	Q07797	0	2	1	0	1	1	1043.99	2086.97	-0.83	-0.00087	876179	HCD (High Energy Collision Dissociation)	MS2	12.4261	80	39.9904	14204	A001.raw	12/192		106	38	23	7.34725e-10	3.95223e+06	40
	FALSE	High	Mascot (A6)	[K].AVDQWSTETIASHEDIER.[L]		1	1	Q07797	Q07797	0	2	1	0	1	1	1043.99	2086.97	1.04	0.00109	171122	HCD (High Energy Collision Dissociation)	MS2	0	80	39.2655	13848	A001.raw	11/192		102	38	23	1.74081e-09	3.63488e+06	39.31
	FALSE	High	Mascot (A6)	[R].LYTSSTWSSLVMASTWR.[A]		1	1	Q07797	Q07797	0	2	1	0	1	1	988.481	1975.95	-1.63	-0.00161	424194	HCD (High Energy Collision Dissociation)	MS2	11.4463	80	62.8916	25474	A001.raw	11/128		100	38	23	2.57182e-09	1.32519e+06	62.81
	FALSE	High	Mascot (A6)	[K].LASAYGATELQDYcGR.[L]	C14(Carbamidomethyl)	1	1	Q07797	Q07797	0	2	1	0	1	1	887.906	1774.8	-1.39	-0.00124	6.00171e+06	HCD (High Energy Collision Dissociation)	MS2	0	20.594	38.8094	13618	A001.raw	11/140		99	37	22	2.55356e-09	1.99097e+07	38.72
	FALSE	High	Mascot (A6)	[R].AAFGPGKGPIMLDEVEcTGTESSLAScR.[S]	C17(Carbamidomethyl); C27(Carbamidomethyl)	1	2	Q07797	E9Q5X5; Q07797	1	3	1	0	1	1	980.789	2940.35	-0.27	-0.00026	2.63836e+06	HCD (High Energy Collision Dissociation)	MS2	0	79.36	49.8869	19070	A001.raw	12/300		98	39	24	5.46874e-09	2.48149e+07	49.76
	FALSE	High	Mascot (A6)	[K].LASAYGATELQDYcGR.[L]	C14(Carbamidomethyl)	1	1	Q07797	Q07797	0	2	1	0	1	1	887.906	1774.8	-1.32	-0.00117	2.42099e+06	HCD (High Energy Collision Dissociation)	MS2	4.2673	39.742	39.1672	13797	A001.raw	11/140		95	37	22	7.23232e-09	5.86329e+06	39.19
	FALSE	High	Mascot (A6)	[R].WGTVcDNLWNLLDAHVVcR.[A]	C5(Carbamidomethyl); C18(Carbamidomethyl)	1	2	Q07797	E9Q5X5; Q07797	0	3	1	0	1	1	776.706	2328.1	0.4	0.00031	9285038	HCD (High Energy Collision Dissociation)	MS2	0.0352907	32.623	66.4512	27190	A001.raw	11/192		95	38	23	9.65813e-09	3.52594e+08	66.55
	FALSE	High	Mascot (A6)	[R].VLILcGGYSVVDVTSFEGSK.[A]	C5(Carbamidomethyl)	2	2	F6VRP8; Q07797	F6VRP8; Q07797	0	2	1	0	1	1	1065.54	2130.08	-1.18	-0.00126	264856	HCD (High Energy Collision Dissociation)	MS2	0	80	57.2967	22740	A001.raw	11/152		89	37	22	2.69756e-08	1.20239e+07	57.36
	FALSE	High	Mascot (A6)	[K].AVDQWSTETIASHEDIER.[L]		1	1	Q07797	Q07797	0	3	1	0	1	1	696.326	2086.96	-2.18	-0.00152	2.09521e+06	HCD (High Energy Collision Dissociation)	MS2	2.15103	80	40.3477	14378	A001.raw	10/192		88	38	23	4.26792e-08	1.97714e+07	40.41
	FALSE	High	Mascot (A6)	[K].AVDQWSTETIASHEDIER.[L]		1	1	Q07797	Q07797	0	2	1	0	1	1	1043.98	2086.96	-3.87	-0.00404	298081	HCD (High Energy Collision Dissociation)	MS2	0	80	40.3378	14374	A001.raw	15/192		87	38	23	5.88246e-08	1373083	40.36
	FALSE	High	Mascot (A6)	[K].LASAYGATELQDYcGR.[L]	C14(Carbamidomethyl)	1	1	Q07797	Q07797	0	2	1	0	1	1	887.906	1774.8	-0.91	-0.00081	3.70241e+06	HCD (High Energy Collision Dissociation)	MS2	0	80	38.4608	13446	A001.raw	14/140		86	37	22	5.73289e-08	1.52675e+07	38.52
	FALSE	High	Mascot (A6)	[K].AVDQWSTETIASHEDIER.[L]		1	1	Q07797	Q07797	0	3	1	0	1	1	696.328	2086.97	0.36	0.00025	4545141	HCD (High Energy Collision Dissociation)	MS2	0.578603	26.855	39.6493	14037	A001.raw	14/192		86	38	23	7.53917e-08	5.90819e+06	39.68
	FALSE	High	Mascot (A6)	[K].LASAYGATELQDYcGR.[L]	C14(Carbamidomethyl)	1	1	Q07797	Q07797	0	2	1	0	1	1	887.905	1774.8	-2.56	-0.00227	453253	HCD (High Energy Collision Dissociation)	MS2	0	80	38.1094	13273	A001.raw	10/140		85	37	22	7.06212e-08	1.59387e+06	38.02
	FALSE	High	Mascot (A6)	[K].AVDQWSTETIASHEDIER.[L]		1	1	Q07797	Q07797	0	3	1	0	1	1	696.328	2086.97	0.8	0.00056	579918	HCD (High Energy Collision Dissociation)	MS2	17.7472	80	39.2962	13863	A001.raw	10/192		83	38	23	1.24612e-07	2.84332e+06	39.34
	FALSE	High	Mascot (A6)	[R].AAFGPGKGPIMLDEVEcTGTESSLAScR.[S]	C17(Carbamidomethyl); C27(Carbamidomethyl)	1	2	Q07797	E9Q5X5; Q07797	1	3	1	0	1	1	980.788	2940.35	-1.76	-0.00173	4.15689e+06	HCD (High Energy Collision Dissociation)	MS2	0	36.864	49.5277	18893	A001.raw	11/300		83	39	24	1.98352e-07	5.01505e+07	49.5
	FALSE	High	Mascot (A6)	[K].LASAYGATELQDYcGR.[L]	C14(Carbamidomethyl)	1	1	Q07797	Q07797	0	2	1	0	1	1	887.906	1774.8	-1.05	-0.00093	1.14294e+06	HCD (High Energy Collision Dissociation)	MS2	0	80	39.51	13967	A001.raw	10/140		82	37	22	1.45965e-07	3.19822e+06	39.49
	FALSE	High	Mascot (A6)	[K].LASAYGATELQDYcGR.[L]	C14(Carbamidomethyl)	1	1	Q07797	Q07797	0	2	1	0	1	1	887.904	1774.8	-3.46	-0.00307	430039	HCD (High Energy Collision Dissociation)	MS2	0	80	39.8712	14147	A001.raw	14/140		79	37	22	2.82347e-07	3.56042e+06	39.86
	FALSE	High	Mascot (A6)	[R].GRWGTVcDNLWNLLDAHVVcR.[A]	C7(Carbamidomethyl); C20(Carbamidomethyl)	1	2	Q07797	E9Q5X5; Q07797	1	3	1	0	1	1	847.745	2541.22	-1.18	-0.001	1.4469e+06	HCD (High Energy Collision Dissociation)	MS2	4.33446	80	63.3673	25703	A001.raw	9/236		79	38	23	3.67071e-07	5.18542e+06	63.34
	FALSE	High	Mascot (A6)	[R].GRWGTVcDNLWNLLDAHVVcR.[A]	C7(Carbamidomethyl); C20(Carbamidomethyl)	1	2	Q07797	E9Q5X5; Q07797	1	3	1	0	1	1	847.745	2541.22	-1.25	-0.00106	666126	HCD (High Energy Collision Dissociation)	MS2	2.02483	80	63.7315	25879	A001.raw	9/236		78	38	23	4.00654e-07	8.56976e+06	63.85
	FALSE	High	Mascot (A6)	[K].AVDQWSTETIASHEDIER.[L]		1	1	Q07797	Q07797	0	3	1	0	1	1	696.327	2086.97	-0.69	-0.00048	5268963	HCD (High Energy Collision Dissociation)	MS2	3.75099	19.348	40.0051	14211	A001.raw	9/192		77	38	23	6.10052e-07	2.69392e+07	40.04
	FALSE	High	Mascot (A6)	[R].TNPEAQALWQVVGSSVIMR.[V]		1	2	Q07797	E9Q5X5; Q07797	0	3	1	0	1	1	696.029	2086.07	-1.93	-0.00134	2.58538e+06	HCD (High Energy Collision Dissociation)	MS2	0	40.526	64.5013	26251	A001.raw	13/212		76	36	21	4.48206e-07	1.68472e+08	64.71
	FALSE	High	Mascot (A6)	[R].TNPEAQALWQVVGSSVIMR.[V]		1	2	Q07797	E9Q5X5; Q07797	0	3	1	0	1	1	696.029	2086.07	-0.61	-0.00043	5.28152e+06	HCD (High Energy Collision Dissociation)	MS2	0	28.166	64.8421	26416	A001.raw	13/212		76	36	21	4.73323e-07	1.68472e+08	64.71
	FALSE	High	Mascot (A6)	[K].AVDQWSTETIASHEDIER.[L]		1	1	Q07797	Q07797	0	3	1	0	1	1	696.328	2086.97	0.71	0.0005	670507	HCD (High Energy Collision Dissociation)	MS2	6.60433	80	40.7124	14558	A001.raw	9/192		75	38	23	7.66955e-07	880509	40.68
	FALSE	High	Mascot (A6)	[R].GRWGTVcDNLWNLLDAHVVcR.[A]	C7(Carbamidomethyl); C20(Carbamidomethyl)	1	2	Q07797	E9Q5X5; Q07797	1	4	1	0	1	1	636.061	2541.22	-0.29	-0.00019	3.59225e+06	HCD (High Energy Collision Dissociation)	MS2	9.47461	52.53	63.3899	25714	A001.raw	19/236		74	38	23	1.15493e-06	3.93367e+07	63.38
	FALSE	High	Mascot (A6)	[R].WGTVcDNLWNLLDAHVVcR.[A]	C5(Carbamidomethyl); C18(Carbamidomethyl)	1	2	Q07797	E9Q5X5; Q07797	0	3	1	0	1	1	776.705	2328.1	-0.31	-0.00024	5262645	HCD (High Energy Collision Dissociation)	MS2	0.7953	51.927	66.7972	27355	A001.raw	12/192		72	38	23	1.90757e-06
	FALSE	High	Mascot (A6)	[R].KTMQALEFHTVPVEVLAK.[Y]		1	1	Q07797	Q07797	1	2	1	0	1	1	1021.06	2041.12	2.44	0.00249	486605	HCD (High Energy Collision Dissociation)	MS2	17.8041	80	46.9368	17617	A001.raw	11/204		68	33	17	1.32626e-06	8.19665e+06	46.92
	FALSE	High	Mascot (A6)	[K].TMQALEFHTVPVEVLAK.[Y]		1	1	Q07797	Q07797	0	2	1	0	1	1	957.013	1913.02	-0.65	-0.00062	1.72366e+06	HCD (High Energy Collision Dissociation)	MS2	43.1304	80	51.6324	19928	A001.raw	21/184		66	34	19	2.68669e-06	1.87336e+07	51.68
	FALSE	High	Mascot (A6)	[K].SELAVSSELDLLK.[A]		1	1	Q07797	Q07797	0	2	1	0	1	1	702.385	1403.76	0.57	0.0004	836947	HCD (High Energy Collision Dissociation)	MS2	26.4081	80	54.9042	21544	A001.raw	10/96		66	33	18	2.31762e-06	3.99752e+06	54.82
	FALSE	High	Mascot (A6)	[K].APIPTALDTNSSK.[T]		2	2	F6VRP8; Q07797	F6VRP8; Q07797	0	2	1	0	1	1	657.849	1314.69	-0.08	-5e-05	1.31072e+06	HCD (High Energy Collision Dissociation)	MS2	10.6106	80	31.4645	10079	A001.raw	7/108		66	35	20	3.81258e-06	6.7106e+06	31.44
	FALSE	High	Mascot (A6)	[R].GRWGTVcDNLWNLLDAHVVcR.[A]	C7(Carbamidomethyl); C20(Carbamidomethyl)	1	2	Q07797	E9Q5X5; Q07797	1	4	1	0	1	1	636.062	2541.22	0.38	0.00024	2.42606e+06	HCD (High Energy Collision Dissociation)	MS2	8.01157	80	63.7526	25889	A001.raw	16/236		61	38	23	2.584e-05	2.82663e+07	63.69
	FALSE	High	Mascot (A6)	[R].YNQLYTYGYGSVAR.[Y]		1	1	Q07797	Q07797	0	2	1	0	1	1	827.895	1654.78	-2.03	-0.00168	1.03888e+06	HCD (High Energy Collision Dissociation)	MS2	23.3894	80	40.9283	14664	A001.raw	7/152		59	37	22	2.38352e-05	3.61018e+06	40.96
	FALSE	High	Mascot (A6)	[R].GRWGTVcDNLWNLLDAHVVcR.[A]	C7(Carbamidomethyl); C20(Carbamidomethyl)	1	2	Q07797	E9Q5X5; Q07797	1	4	1	0	1	1	636.062	2541.22	0.38	0.00024	457314	HCD (High Energy Collision Dissociation)	MS2	49.4093	80	64.094	26054	A001.raw	16/236		59	38	23	3.80445e-05	2.41352e+06	64.1
	FALSE	High	Mascot (A6)	[R].GRWGTVcDNLWNLLDAHVVcR.[A]	C7(Carbamidomethyl); C20(Carbamidomethyl)	1	2	Q07797	E9Q5X5; Q07797	1	3	1	0	1	1	847.745	2541.22	-1.61	-0.00136	211215	HCD (High Energy Collision Dissociation)	MS2	39.7655	80	63.0056	25529	A001.raw	17/236		59	38	23	3.77022e-05	2.766e+06	63.06
	FALSE	High	Mascot (A6)	[R].VDAEcMPVVR.[D]	C5(Carbamidomethyl)	1	1	Q07797	Q07797	0	2	0.8246	0	1	1	588.281	1175.56	0.51	0.0003	2608193	HCD (High Energy Collision Dissociation)	MS2	3.11683	31.037	32.1034	10367	A001.raw	6/72		57	35	20	2.69032e-05	8.38048e+06	32.06
	FALSE	High	Mascot (A6)	[R].VDAEcMPVVR.[D]	C5(Carbamidomethyl)	1	1	Q07797	Q07797	0	2	0.8246	0	1	1	588.281	1175.55	-0.11	-6e-05	3.51262e+06	HCD (High Energy Collision Dissociation)	MS2	4.11364	24.758	31.7634	10209	A001.raw	6/72		57	34	19	2.43779e-05	1.51731e+07	31.83
	FALSE	High	Mascot (A6)	[R].YNQLYTYGYGSVAR.[Y]		1	1	Q07797	Q07797	0	2	1	0	1	1	827.895	1654.78	-2.54	-0.00211	955860	HCD (High Energy Collision Dissociation)	MS2	27.5226	80	40.5651	14486	A001.raw	7/152		56	37	22	5.7049e-05	4.23828e+06	40.63
	FALSE	High	Mascot (A6)	[R].YNSYQSFQTPQHPSFLFK.[D]		1	1	Q07797	Q07797	0	2	1	0	1	1	1110.03	2219.05	-1.06	-0.00118	500063	HCD (High Energy Collision Dissociation)	MS2	31.5279	80	49.0961	18682	A001.raw	8/200		55	38	23	7.82983e-05	5.18966e+06	49.05
	FALSE	High	Mascot (A6)	[K].SELAVSSELDLLK.[A]		1	1	Q07797	Q07797	0	2	0.9636	0	1	1	702.385	1403.76	-0.56	-0.0004	188588	HCD (High Energy Collision Dissociation)	MS2	0	80	116.482	46618	A001.raw	9/96		55	34	19	3.37569e-05	2.57233e+06	116.48
	FALSE	High	Mascot (A6)	[R].TNPEAQALWQVVGSSVIMR.[V]		1	2	Q07797	E9Q5X5; Q07797	0	3	1	0	1	1	696.03	2086.08	0.35	0.00024	859049	HCD (High Energy Collision Dissociation)	MS2	0	80	65.1821	26580	A001.raw	12/212		55	36	21	5.96134e-05	1.93977e+07	65.03
	FALSE	High	Mascot (A6)	[R].GRWGTVcDNLWNLLDAHVVcR.[A]	C7(Carbamidomethyl); C20(Carbamidomethyl)	1	2	Q07797	E9Q5X5; Q07797	1	4	1	0	1	1	636.061	2541.22	0.09	6e-05	429396	HCD (High Energy Collision Dissociation)	MS2	41.2803	80	63.0284	25540	A001.raw	8/236		55	38	23	9.92871e-05	1.50143e+06	63.08
	FALSE	High	Mascot (A6)	[K].SELAVSSELDLLK.[A]		1	1	Q07797	Q07797	0	2	0.9615	0	1	1	702.385	1403.76	-0.39	-0.00027	1599583	HCD (High Energy Collision Dissociation)	MS2	23.9008	59.205	53.1978	20697	A001.raw	11/96		52	34	19	7.26712e-05	1.3863e+07	53.24
	FALSE	High	Mascot (A6)	[R].YNSYQSFQTPQHPSFLFK.[D]		1	1	Q07797	Q07797	0	3	1	0	1	1	740.355	2219.05	-1.78	-0.00132	2.71853e+06	HCD (High Energy Collision Dissociation)	MS2	8.10497	80	49.1561	18710	A001.raw	12/200		49	38	23	0.000296577	1.60109e+07	49.17
	FALSE	High	Mascot (A6)	[R].KTMQALEFHTVPVEVLAK.[Y]		1	1	Q07797	Q07797	1	2	1	0	1	1	1021.06	2041.11	-1.21	-0.00123	303105	HCD (High Energy Collision Dissociation)	MS2	0	80	47.3185	17807	A001.raw	13/204		48	33	18	0.000141066	3.86024e+06	47.24
	FALSE	High	Mascot (A6)	[K].SELAVSSELDLLKAVDQWSTETIASHEDIER.[L]		1	1	Q07797	Q07797	1	4	1	0	1	1	868.688	3471.73	4.92	0.00427	15835.1	HCD (High Energy Collision Dissociation)	MS2	10.0833	80	71.7487	29722	A001.raw	7/312		47	36	21	0.000380051	6.91589e+06	71.9
	FALSE	High	Mascot (A6)	[R].LYTSSTWSSLVMASTWR.[A]		1	1	Q07797	Q07797	0	3	1	0	1	1	659.322	1975.95	-3.21	-0.00212	61445.7	HCD (High Energy Collision Dissociation)	MS2	22.274	80	62.7444	25404	A001.raw	9/128		46	38	23	0.000665018
	FALSE	High	Mascot (A6)	[R].VDAEcMPVVR.[D]	C5(Carbamidomethyl)	1	1	Q07797	Q07797	0	2	0.913	0	1	1	588.281	1175.55	-0.63	-0.00037	1.32875e+06	HCD (High Energy Collision Dissociation)	MS2	16.7405	80	31.4122	10053	A001.raw	8/72		46	34	19	0.000321296	8.10475e+06	31.44
	FALSE	High	Mascot (A6)	[R].LFATLLPQDPTFHTPLDLYAYAR.[A]		1	1	Q07797	Q07797	0	2	1	0	1	1	1332.2	2663.39	0.45	0.00059	336992	HCD (High Energy Collision Dissociation)	MS2	0	80	67.236	27565	A001.raw	15/236		45	34	19	0.000341502	2.03397e+06	67.25
	FALSE	High	Mascot (A6)	[R].KTMQALEFHTVPVEVLAK.[Y]		1	1	Q07797	Q07797	1	3	1	0	1	1	681.045	2041.12	2.88	0.00196	2.25839e+06	HCD (High Energy Collision Dissociation)	MS2	16.441	34.567	47.1987	17746	A001.raw	9/204		44	33	17	0.000290822	5770515	47.31
	FALSE	High	Mascot (A6)	[K].SELAVSSELDLLK.[A]		1	1	Q07797	Q07797	0	2	1	0	1	1	702.386	1403.76	1.44	0.00101	220075	HCD (High Energy Collision Dissociation)	MS2	17.7598	80	58.9154	23537	A001.raw	8/96		44	33	18	0.000351901	1.06537e+06	58.88
	FALSE	High	Mascot (A6)	[R].YNSYQSFQTPQHPSFLFK.[D]		1	1	Q07797	Q07797	0	3	1	0	1	1	740.356	2219.05	-1.54	-0.00114	4.17216e+06	HCD (High Energy Collision Dissociation)	MS2	4.30398	73.354	48.799	18535	A001.raw	11/200		43	38	23	0.00138729	4.57126e+07	48.73
	FALSE	High	Mascot (A6)	[R].YNQLYTYGYGSVAR.[Y]		1	1	Q07797	Q07797	0	2	1	0	1	1	827.895	1654.78	-2.4	-0.00198	432955	HCD (High Energy Collision Dissociation)	MS2	30.0126	80	40.2184	14317	A001.raw	6/152		43	37	22	0.00115734	3.9623e+06	40.19
	FALSE	High	Mascot (A6)	[K].SELAVSSELDLLKAVDQWSTETIASHEDIER.[L]		1	1	Q07797	Q07797	1	4	1	0	1	1	868.682	3471.71	-1.83	-0.00159	181505	HCD (High Energy Collision Dissociation)	MS2	41.788	80	72.0942	29886	A001.raw	8/312		41	37	22	0.00168558	7.50925e+06	72
	FALSE	High	Mascot (A6)	[R].YNQLYTYGYGSVAR.[Y]		1	1	Q07797	Q07797	0	2	1	0	1	1	827.895	1654.78	-1.88	-0.00156	312286	HCD (High Energy Collision Dissociation)	MS2	26.6902	80	41.2862	14842	A001.raw	6/152		41	37	22	0.00156832	8.01754e+06	41.18
	FALSE	High	Mascot (A6)	[R].LFATLLPQDPTFHTPLDLYAYAR.[A]		1	1	Q07797	Q07797	0	3	1	0	1	1	888.466	2663.38	-1.32	-0.00118	7211265	HCD (High Energy Collision Dissociation)	MS2	0	51.687	67.0041	27454	A001.raw	15/236		40	35	20	0.00113264	2.42259e+08	66.99
	FALSE	High	Mascot (A6)	[R].KTMQALEFHTVPVEVLAK.[Y]		1	1	Q07797	Q07797	1	3	1	0	1	1	681.044	2041.12	0.55	0.00038	2.65847e+06	HCD (High Energy Collision Dissociation)	MS2	22.7373	23.661	46.8457	17571	A001.raw	8/204		40	33	17	0.000744508	8.44308e+07	46.9
	FALSE	High	Mascot (A6)	[R].LFATLLPQDPTFHTPLDLYAYAR.[A]		1	1	Q07797	Q07797	0	3	1	0	1	1	888.467	2663.39	-0.57	-0.0005	3.88073e+06	HCD (High Energy Collision Dissociation)	MS2	0	80	67.3492	27619	A001.raw	15/236		40	34	19	0.00126925	2.65559e+07	67.26
	FALSE	High	Mascot (A6)	[R].LFATLLPQDPTFHTPLDLYAYAR.[A]		1	1	Q07797	Q07797	0	2	1	0	1	1	1332.19	2663.38	-1.94	-0.00258	98669.8	HCD (High Energy Collision Dissociation)	MS2	0	80	66.8755	27393	A001.raw	19/236		40	35	20	0.0013586	1.58529e+07	66.93
	FALSE	High	Mascot (A6)	[R].TNPEAQALWQVVGSSVIMR.[V]		1	2	Q07797	E9Q5X5; Q07797	0	3	1	0	1	1	696.028	2086.07	-2.98	-0.00207	281532	HCD (High Energy Collision Dissociation)	MS2	60.3246	80	64.1519	26083	A001.raw	9/212		39	36	21	0.00248662	1.10533e+06	64.14
	FALSE	High	Mascot (A6)	[R].LFATLLPQDPTFHTPLDLYAYAR.[A]		1	1	Q07797	Q07797	0	3	1	0	1	1	888.468	2663.39	0.53	0.00047	1.757e+06	HCD (High Energy Collision Dissociation)	MS2	0	80	67.6945	27784	A001.raw	8/236		38	34	19	0.00182984	1.36397e+07	67.56
FALSE	Master Protein	P62806	Histone H4 OS=Mus musculus GN=Hist1h4a PE=1 SV=2	42.7184	6	28	6	1	103	11.4	11.36	High		High	0	45.18	6	High	0	551	5
	Checked	Confidence	Identifying Node	Annotated Sequence	Modifications	# Protein Groups	# Proteins	Master Protein Accessions	Protein Accessions	# Missed Cleavages	Charge	DeltaScore	DeltaCn	Rank	Search Engine Rank	m/z [Da]	MH+ [Da]	DeltaM [ppm]	Deltam/z [Da]	Intensity	Activation Type	MS Order	Isolation Interference [%]	Ion Inject Time [ms]	RT [min]	First Scan	Spectrum File	Ions Matched	XCorr	Ions Score	Identity Strict	Identity Relaxed	Expectation Value	Area	Apex RT [min]
	FALSE	High	Sequest HT (A2)	[K].TVTAMDVVYALKR.[Q]		1	1	P62806	P62806	1	2	0.7594	0	1	1	733.907	1466.81	1.72	0.00126	1.48002e+06	HCD (High Energy Collision Dissociation)	MS2	17.8395	80	49.9347	19094	A001.raw	0/0	3.74
	FALSE	High	Sequest HT (A2)	[K].TVTAMDVVYALKR.[Q]		1	1	P62806	P62806	1	2	0.7871	0	1	1	733.905	1466.8	-0.45	-0.00033	631432	HCD (High Energy Collision Dissociation)	MS2	50.0363	80	49.5159	18888	A001.raw	0/0	3.57					1.34042e+06	49.51
	FALSE	High	Sequest HT (A2)	[K].TVTAMDVVYALKR.[Q]		1	1	P62806	P62806	1	3	0.8052	0	1	1	489.606	1466.8	-0.6	-0.00029	774492	HCD (High Energy Collision Dissociation)	MS2	0	80	49.4899	18875	A001.raw	0/0	3.49					7.41834e+06	49.5
	FALSE	High	Sequest HT (A2)	[R].DNIQGITKPAIR.[R]		1	1	P62806	P62806	0	3	0.7988	0	1	1	442.589	1325.75	0.23	0.0001	3147580	HCD (High Energy Collision Dissociation)	MS2	11.2991	21.189	30.5761	9660	A001.raw	0/0	3.33					2.19544e+07	30.61
	FALSE	High	Sequest HT (A2)	[R].DNIQGITKPAIR.[R]		1	1	P62806	P62806	0	2	0.7988	0	1	1	663.382	1325.76	2.04	0.00135	4.9304e+06	HCD (High Energy Collision Dissociation)	MS2	2.28923	32.474	30.5238	9634	A001.raw	0/0	3.28					1.01347e+07	30.52
	FALSE	High	Sequest HT (A2)	[K].TVTAMDVVYALK.[R]		1	1	P62806	P62806	0	2	0.7073	0	1	1	655.855	1310.7	-0.38	-0.00025	969506	HCD (High Energy Collision Dissociation)	MS2	67.6976	73.713	53.8349	21014	A001.raw	0/0	3.28					7.47083e+06	53.76
	FALSE	High	Sequest HT (A2)	[R].DNIQGITKPAIR.[R]		1	1	P62806	P62806	0	3	0.7484	0	1	1	442.59	1325.76	1.33	0.00059	1.2567e+06	HCD (High Energy Collision Dissociation)	MS2	30.3325	52.341	30.2271	9497	A001.raw	0/0	3.18					3.59855e+06	30.24
	FALSE	High	Sequest HT (A2)	[R].DNIQGITKPAIR.[R]		1	1	P62806	P62806	0	2	0.7937	0	1	1	663.381	1325.75	0.65	0.00043	2.79841e+06	HCD (High Energy Collision Dissociation)	MS2	0	45.462	30.8764	9803	A001.raw	0/0	3.15					1.70352e+07	30.81
	FALSE	High	Sequest HT (A2)	[K].TVTAMDVVYALKR.[Q]		1	1	P62806	P62806	1	3	0.8199	0	1	1	489.606	1466.8	-0.73	-0.00036	3.48105e+06	HCD (High Energy Collision Dissociation)	MS2	3.81697	27.983	49.8434	19049	A001.raw	0/0	3.11					2.78499e+07	49.86
	FALSE	High	Sequest HT (A2)	[R].DNIQGITKPAIR.[R]		1	1	P62806	P62806	0	2	0.7491	0	1	1	663.38	1325.75	-0.54	-0.00036	868275	HCD (High Energy Collision Dissociation)	MS2	0	80	31.2176	9961	A001.raw	0/0	2.87					2.06978e+06	31.22
	FALSE	High	Sequest HT (A2)	[R].DNIQGITKPAIR.[R]		1	1	P62806	P62806	0	2	0.7872	0	1	1	663.381	1325.75	1.02	0.00068	1238618	HCD (High Energy Collision Dissociation)	MS2	4.42708	80	30.1791	9474	A001.raw	0/0	2.82					1.56686e+06	30.1
	FALSE	High	Sequest HT (A2)	[R].DNIQGITKPAIRR.[L]		1	1	P62806	P62806	1	3	0.7628	0	1	1	494.624	1481.86	0.92	0.00046	1.12397e+06	HCD (High Energy Collision Dissociation)	MS2	17.4781	80	27.6243	8256	A001.raw	0/0	2.74					2015041	27.61
	FALSE	High	Sequest HT (A2)	[R].ISGLIYEETR.[G]		1	1	P62806	P62806	0	2	0.5726	0	1	1	590.813	1180.62	-1.18	-0.0007	4155134	HCD (High Energy Collision Dissociation)	MS2	17.5749	15.829	36.6727	12576	A001.raw	0/0	2.48					12457024	36.63
	FALSE	High	Sequest HT (A2)	[R].ISGLIYEETR.[G]		1	1	P62806	P62806	0	2	0.5	0	1	1	590.814	1180.62	-0.36	-0.00021	3.99386e+06	HCD (High Energy Collision Dissociation)	MS2	9.91269	13.744	37.0223	12745	A001.raw	0/0	2.08					3.95345e+06	37.02
	FALSE	High	Sequest HT (A2)	[K].VFLENVIR.[D]		1	1	P62806	P62806	0	2	0.6732	0	1	1	495.293	989.579	1.2	0.00059	16421808	HCD (High Energy Collision Dissociation)	MS2	24.1075	4.91	44.8773	16589	A001.raw	0/0	2.05					6.24073e+07	44.83
	FALSE	High	Mascot (A6)	[R].DNIQGITKPAIR.[R]		1	1	P62806	P62806	0	2	1	0	1	1	663.381	1325.75	0.65	0.00043	2.79841e+06	HCD (High Energy Collision Dissociation)	MS2	0	45.462	30.8764	9803	A001.raw	8/128		88	31	15	7.27347e-09	1.70352e+07	30.81
	FALSE	High	Mascot (A6)	[R].DNIQGITKPAIR.[R]		1	1	P62806	P62806	0	2	1	0	1	1	663.382	1325.76	2.04	0.00135	4.9304e+06	HCD (High Energy Collision Dissociation)	MS2	2.28923	32.474	30.5238	9634	A001.raw	7/128		74	31	16	1.85768e-07	1.01347e+07	30.52
	FALSE	High	Mascot (A6)	[K].TVTAMDVVYALKR.[Q]		1	1	P62806	P62806	1	2	1	0	1	1	733.907	1466.81	1.72	0.00126	1.48002e+06	HCD (High Energy Collision Dissociation)	MS2	17.8395	80	49.9347	19094	A001.raw	11/100		65	33	18	2.66298e-06
	FALSE	High	Mascot (A6)	[K].TVTAMDVVYALKR.[Q]		1	1	P62806	P62806	1	2	1	0	1	1	733.905	1466.8	-0.45	-0.00033	631432	HCD (High Energy Collision Dissociation)	MS2	50.0363	80	49.5159	18888	A001.raw	10/100		59	34	19	1.24119e-05	1.34042e+06	49.51
	FALSE	High	Mascot (A6)	[R].DNIQGITKPAIR.[R]		1	1	P62806	P62806	0	2	1	0	1	1	663.38	1325.75	-0.54	-0.00036	868275	HCD (High Energy Collision Dissociation)	MS2	0	80	31.2176	9961	A001.raw	8/128		58	31	16	8.73832e-06	2.06978e+06	31.22
	FALSE	High	Mascot (A6)	[R].DNIQGITKPAIR.[R]		1	1	P62806	P62806	0	2	1	0	1	1	663.381	1325.75	1.02	0.00068	1238618	HCD (High Energy Collision Dissociation)	MS2	4.42708	80	30.1791	9474	A001.raw	8/128		58	30	15	8.0481e-06	1.56686e+06	30.1
	FALSE	High	Mascot (A6)	[K].TVTAMDVVYALK.[R]		1	1	P62806	P62806	0	2	1	0	1	1	655.855	1310.7	-0.38	-0.00025	969506	HCD (High Energy Collision Dissociation)	MS2	67.6976	73.713	53.8349	21014	A001.raw	8/88		51	33	18	7.87278e-05	7.47083e+06	53.76
	FALSE	High	Mascot (A6)	[K].TVTAMDVVYALKR.[Q]		1	1	P62806	P62806	1	3	1	0	1	1	489.606	1466.8	-0.73	-0.00036	3.48105e+06	HCD (High Energy Collision Dissociation)	MS2	3.81697	27.983	49.8434	19049	A001.raw	6/100		49	34	19	0.00014091	2.78499e+07	49.86
	FALSE	High	Mascot (A6)	[K].VFLENVIR.[D]		1	1	P62806	P62806	0	2	0.8542	0	1	1	495.293	989.579	1.2	0.00059	16421808	HCD (High Energy Collision Dissociation)	MS2	24.1075	4.91	44.8773	16589	A001.raw	7/68		48	32	16	9.52533e-05	6.24073e+07	44.83
	FALSE	High	Mascot (A6)	[K].VFLENVIR.[D]		1	1	P62806	P62806	0	2	0.8511	0	1	1	495.293	989.58	1.75	0.00087	6295469	HCD (High Energy Collision Dissociation)	MS2	24.7514	11.855	45.2305	16765	A001.raw	7/68		47	32	16	0.000137683
	FALSE	High	Mascot (A6)	[R].ISGLIYEETR.[G]		1	1	P62806	P62806	0	2	1	0	1	1	590.813	1180.62	-1.18	-0.0007	4155134	HCD (High Energy Collision Dissociation)	MS2	17.5749	15.829	36.6727	12576	A001.raw	9/72		41	35	20	0.00105024	12457024	36.63
	FALSE	High	Mascot (A6)	[R].DNIQGITKPAIR.[R]		1	1	P62806	P62806	0	3	1	0	1	1	442.589	1325.75	0.23	0.0001	3147580	HCD (High Energy Collision Dissociation)	MS2	11.2991	21.189	30.5761	9660	A001.raw	7/128		40	30	15	0.00046133	2.19544e+07	30.61
	FALSE	High	Mascot (A6)	[K].TVTAMDVVYALK.[R]		1	1	P62806	P62806	0	2	1	0	1	1	655.854	1310.7	-0.66	-0.00043	1.30623e+06	HCD (High Energy Collision Dissociation)	MS2	74.3469	14.833	53.3992	20796	A001.raw	8/88		37	34	19	0.00195486	3.77201e+06	53.4
FALSE	Master Protein	P51150	Ras-related protein Rab-7a OS=Mus musculus GN=Rab7a PE=1 SV=2	41.0628	7	13	7	1	207	23.5	6.7	High		High	0	27.04	7	High	0	175	2
	Checked	Confidence	Identifying Node	Annotated Sequence	Modifications	# Protein Groups	# Proteins	Master Protein Accessions	Protein Accessions	# Missed Cleavages	Charge	DeltaScore	DeltaCn	Rank	Search Engine Rank	m/z [Da]	MH+ [Da]	DeltaM [ppm]	Deltam/z [Da]	Intensity	Activation Type	MS Order	Isolation Interference [%]	Ion Inject Time [ms]	RT [min]	First Scan	Spectrum File	Ions Matched	XCorr	Ions Score	Identity Strict	Identity Relaxed	Expectation Value	Area	Apex RT [min]
	FALSE	High	Sequest HT (A2)	[K].EAINVEQAFQTIAR.[N]		1	1	P51150	P51150	0	2	0.8325	0	1	1	795.418	1589.83	0.29	0.00023	1.16873e+06	HCD (High Energy Collision Dissociation)	MS2	5.13551	80	54.948	21567	A001.raw	0/0	4.12					9032241	54.87
	FALSE	High	Sequest HT (A2)	[K].EAINVEQAFQTIAR.[N]		1	1	P51150	P51150	0	2	0.7945	0	1	1	795.418	1589.83	0.6	0.00048	1.52749e+06	HCD (High Energy Collision Dissociation)	MS2	0	77.555	54.588	21386	A001.raw	0/0	3.99					8367499	54.49
	FALSE	High	Sequest HT (A2)	[K].TLDSWRDEFLIQASPR.[D]		1	1	P51150	P51150	1	3	0.6809	0	1	1	645.333	1933.99	4.33	0.00279	747574	HCD (High Energy Collision Dissociation)	MS2	71.0628	80	52.2732	20244	A001.raw	0/0	3.51					3.02605e+06	52.26
	FALSE	High	Sequest HT (A2)	[R].DPENFPFVVLGNK.[I]		1	1	P51150	P51150	0	2	0.5541	0	1	1	738.379	1475.75	-2.1	-0.00155	1.20457e+06	HCD (High Energy Collision Dissociation)	MS2	38.5701	80	56.0372	22111	A001.raw	0/0	2.31					1.42848e+07	56.02
	FALSE	High	Sequest HT (A2)	[K].VIILGDSGVGK.[T]		1	1	P51150	P51150	0	2	0.3506	0	1	1	529.317	1057.63	0.79	0.00042	1.81106e+06	HCD (High Energy Collision Dissociation)	MS2	11.3652	68.928	36.4827	12485	A001.raw	0/0	2.31					7.87432e+06	36.43
	FALSE	High	Sequest HT (A2)	[K].VIILGDSGVGK.[T]		1	1	P51150	P51150	0	2	0.3067	0	1	1	529.315	1057.62	-2.79	-0.00147	438083	HCD (High Energy Collision Dissociation)	MS2	0	80	35.8628	12186	A001.raw	0/0	2.25
	FALSE	High	Sequest HT (A2)	[K].NNIPYFETSAK.[E]		1	1	P51150	P51150	0	2	0.6773	0	1	1	642.318	1283.63	2.18	0.0014	1.24178e+06	HCD (High Energy Collision Dissociation)	MS2	13.9299	80	37.3956	12929	A001.raw	0/0	2.2					4.27943e+06	37.4
	FALSE	High	Sequest HT (A2)	[R].FQSLGVAFYR.[G]		1	1	P51150	P51150	0	2	0.5748	0	1	1	594.314	1187.62	-0.51	-0.0003	1.39512e+06	HCD (High Energy Collision Dissociation)	MS2	17.8043	80	46.7124	17505	A001.raw	0/0	2.14					1.62748e+07	46.71
	FALSE	High	Sequest HT (A2)	[K].ATIGADFLTK.[E]		1	1	P51150	P51150	0	2	0.4502	0	1	1	518.788	1036.57	1.03	0.00054	1.1069e+06	HCD (High Energy Collision Dissociation)	MS2	18.1203	80	40.7789	14590	A001.raw	0/0	2.11
	FALSE	High	Sequest HT (A2)	[K].NNIPYFETSAK.[E]		1	1	P51150	P51150	0	2	0.6172	0	1	1	642.317	1283.63	-0.58	-0.00037	985153	HCD (High Energy Collision Dissociation)	MS2	25.0512	80	37.0399	12754	A001.raw	0/0	2.09					1.50376e+06	37.02
	FALSE	High	Mascot (A6)	[K].EAINVEQAFQTIAR.[N]		1	1	P51150	P51150	0	2	1	0	1	1	795.418	1589.83	0.6	0.00048	1.52749e+06	HCD (High Energy Collision Dissociation)	MS2	0	77.555	54.588	21386	A001.raw	12/144		77	35	20	2.78259e-07	8367499	54.49
	FALSE	High	Mascot (A6)	[K].EAINVEQAFQTIAR.[N]		1	1	P51150	P51150	0	2	1	0	1	1	795.418	1589.83	0.29	0.00023	1.16873e+06	HCD (High Energy Collision Dissociation)	MS2	5.13551	80	54.948	21567	A001.raw	11/144		77	35	20	2.7625e-07	9032241	54.87
	FALSE	High	Mascot (A6)	[K].VIILGDSGVGK.[T]		1	1	P51150	P51150	0	2	0.6346	0	1	1	529.317	1057.63	0.79	0.00042	1.81106e+06	HCD (High Energy Collision Dissociation)	MS2	11.3652	68.928	36.4827	12485	A001.raw	8/80		52	34	19	7.99316e-05	7.87432e+06	36.43
FALSE	Master Protein	P10605	Cathepsin B OS=Mus musculus GN=Ctsb PE=1 SV=2	39.233	12	62	12	1	339	37.3	5.91	High		High	0	104.09	10	High	0	1657	11
	Checked	Confidence	Identifying Node	Annotated Sequence	Modifications	# Protein Groups	# Proteins	Master Protein Accessions	Protein Accessions	# Missed Cleavages	Charge	DeltaScore	DeltaCn	Rank	Search Engine Rank	m/z [Da]	MH+ [Da]	DeltaM [ppm]	Deltam/z [Da]	Intensity	Activation Type	MS Order	Isolation Interference [%]	Ion Inject Time [ms]	RT [min]	First Scan	Spectrum File	Ions Matched	XCorr	Ions Score	Identity Strict	Identity Relaxed	Expectation Value	Area	Apex RT [min]
	FALSE	High	Sequest HT (A2)	[K].ILRGENHcGIESEIVAGIPR.[T]	C8(Carbamidomethyl)	1	1	P10605	P10605	1	3	0.739	0	1	1	740.723	2220.15	-0.38	-0.00028	709828	HCD (High Energy Collision Dissociation)	MS2	37.3338	80	43.7099	16013	A001.raw	0/0	5.21					8.32608e+06	43.71
	FALSE	High	Sequest HT (A2)	[K].NGPVEGAFTVFSDFLTYK.[S]		1	1	P10605	P10605	0	2	0.8241	0	1	1	996.492	1991.98	0.66	0.00066	363450	HCD (High Energy Collision Dissociation)	MS2	2.15451	80	74.8009	31171	A001.raw	0/0	4.89					1.31053e+06	74.77
	FALSE	High	Sequest HT (A2)	[K].NGPVEGAFTVFSDFLTYK.[S]		1	1	P10605	P10605	0	2	0.8096	0	1	1	996.49	1991.97	-0.93	-0.00092	866479	HCD (High Energy Collision Dissociation)	MS2	0	80	74.4522	31006	A001.raw	0/0	4.78					5.73356e+06	74.4
	FALSE	High	Sequest HT (A2)	[K].NGPVEGAFTVFSDFLTYK.[S]		1	1	P10605	P10605	0	2	0.8108	0	1	1	996.49	1991.97	-0.87	-0.00086	860347	HCD (High Energy Collision Dissociation)	MS2	4.39802	80	74.1051	30841	A001.raw	0/0	4.65					1.40557e+07	74.11
	FALSE	High	Sequest HT (A2)	[K].NGPVEGAFTVFSDFLTYK.[S]		1	1	P10605	P10605	0	2	0.7785	0	1	1	996.492	1991.98	0.79	0.00078	126424	HCD (High Energy Collision Dissociation)	MS2	0	80	75.1516	31336	A001.raw	0/0	4.38					1.41093e+06	75.12
	FALSE	High	Sequest HT (A2)	[R].VAFGEDIDLPETFDAR.[E]		1	1	P10605	P10605	0	2	0.7076	0	1	1	897.93	1794.85	-1.39	-0.00125	3.82106e+06	HCD (High Energy Collision Dissociation)	MS2	12.8746	25.694	54.5862	21385	A001.raw	0/0	4.07					25728841	54.67
	FALSE	High	Sequest HT (A2)	[K].NGPVEGAFTVFSDFLTYK.[S]		1	1	P10605	P10605	0	3	0.7543	0	1	1	664.663	1991.97	-0.2	-0.00013	350611	HCD (High Energy Collision Dissociation)	MS2	0	80	74.6887	31118	A001.raw	0/0	4.03					2.2917e+06	74.68
	FALSE	High	Sequest HT (A2)	[R].VAFGEDIDLPETFDAR.[E]		1	1	P10605	P10605	0	2	0.6915	0	1	1	897.93	1794.85	-0.78	-0.0007	5.85225e+06	HCD (High Energy Collision Dissociation)	MS2	4.84073	22.085	54.9407	21562	A001.raw	0/0	4.02					49452917	54.81
	FALSE	High	Sequest HT (A2)	[K].NGPVEGAFTVFSDFLTYK.[S]		1	1	P10605	P10605	0	2	0.7893	0	1	1	996.49	1991.97	-0.99	-0.00099	196708	HCD (High Energy Collision Dissociation)	MS2	36.9934	80	73.743	30669	A001.raw	0/0	3.94
	FALSE	High	Sequest HT (A2)	[K].NGPVEGAFTVFSDFLTYK.[S]		1	1	P10605	P10605	0	3	0.7653	0	1	1	664.663	1991.98	0.35	0.00023	217444	HCD (High Energy Collision Dissociation)	MS2	0	80	74.3386	30952	A001.raw	0/0	3.92
	FALSE	High	Sequest HT (A2)	[R].GENHcGIESEIVAGIPR.[T]	C5(Carbamidomethyl)	1	1	P10605	P10605	0	3	0.7275	0	1	1	613.301	1837.89	0.81	0.0005	578139	HCD (High Energy Collision Dissociation)	MS2	8.5205	80	44.1887	16244	A001.raw	0/0	3.89					8.29314e+06	44.28
	FALSE	High	Sequest HT (A2)	[K].NGPVEGAFTVFSDFLTYK.[S]		1	1	P10605	P10605	0	3	0.77	0	1	1	664.664	1991.98	0.54	0.00036	126687	HCD (High Energy Collision Dissociation)	MS2	0	80	73.9957	30789	A001.raw	0/0	3.87					2.88238e+06	73.95
	FALSE	High	Sequest HT (A2)	[R].VAFGEDIDLPETFDAR.[E]		1	1	P10605	P10605	0	2	0.766	0	1	1	897.93	1794.85	-0.44	-0.00039	1.58939e+06	HCD (High Energy Collision Dissociation)	MS2	11.9143	80	55.2966	21740	A001.raw	0/0	3.76					5.26386e+06	55.29
	FALSE	High	Sequest HT (A2)	[R].NFYNVDISYLKK.[L]		1	1	P10605	P10605	1	3	0.4511	0	1	1	501.933	1503.78	-0.36	-0.00018	1.50378e+06	HCD (High Energy Collision Dissociation)	MS2	16.5849	62.808	45.142	16720	A001.raw	0/0	3.68
	FALSE	High	Sequest HT (A2)	[R].VAFGEDIDLPETFDAR.[E]		1	1	P10605	P10605	0	2	0.6986	0	1	1	897.93	1794.85	-1.12	-0.001	510690	HCD (High Energy Collision Dissociation)	MS2	54.5447	80	54.2442	21216	A001.raw	0/0	3.55					2.17526e+06	54.24
	FALSE	High	Sequest HT (A2)	[R].NFYNVDISYLK.[K]		1	1	P10605	P10605	0	2	0.7134	0	1	1	688.348	1375.69	-0.08	-5e-05	2.5395e+06	HCD (High Energy Collision Dissociation)	MS2	23.977	43.693	51.031	19631	A001.raw	0/0	3.35
	FALSE	High	Sequest HT (A2)	[R].EQWSNcPTIGQIR.[D]	C6(Carbamidomethyl)	1	1	P10605	P10605	0	2	0.6627	0	1	1	794.88	1588.75	-0.5	-0.0004	4915933	HCD (High Energy Collision Dissociation)	MS2	0	30.293	39.3625	13895	A001.raw	0/0	3.35					1.44945e+07	39.34
	FALSE	High	Sequest HT (A2)	[R].NFYNVDISYLK.[K]		1	1	P10605	P10605	0	2	0.7182	0	1	1	688.349	1375.69	0.81	0.00056	1.2575e+06	HCD (High Energy Collision Dissociation)	MS2	9.93578	80	50.3039	19271	A001.raw	0/0	3.3					4.19456e+06	50.36
	FALSE	High	Sequest HT (A2)	[K].LcGTVLGGPKLPGR.[V]	C2(Carbamidomethyl)	1	1	P10605	P10605	1	3	0.7086	0	1	1	475.606	1424.8	-0.19	-9e-05	727630	HCD (High Energy Collision Dissociation)	MS2	71.1873	80	36.6833	12582	A001.raw	0/0	3.26					4.79638e+06	36.62
	FALSE	High	Sequest HT (A2)	[R].EQWSNcPTIGQIR.[D]	C6(Carbamidomethyl)	1	1	P10605	P10605	0	2	0.6431	0	1	1	794.88	1588.75	-0.04	-3e-05	1.21868e+06	HCD (High Energy Collision Dissociation)	MS2	0	80	39.7199	14071	A001.raw	0/0	3.25					2.79778e+06	39.73
	FALSE	High	Sequest HT (A2)	[R].GENHcGIESEIVAGIPR.[T]	C5(Carbamidomethyl)	1	1	P10605	P10605	0	2	0.7259	0	1	1	919.443	1837.88	-4.1	-0.00377	186424	HCD (High Energy Collision Dissociation)	MS2	0	80	44.1048	16203	A001.raw	0/0	3.21					2.65281e+06	44.11
	FALSE	High	Sequest HT (A2)	[R].NFYNVDISYLK.[K]		1	1	P10605	P10605	0	2	0.727	0	1	1	688.348	1375.69	-0.26	-0.00018	4.24199e+06	HCD (High Energy Collision Dissociation)	MS2	4.98843	33.619	50.6527	19443	A001.raw	0/0	3.04					1.65952e+07	50.61
	FALSE	High	Sequest HT (A2)	[R].EQWSNcPTIGQIR.[D]	C6(Carbamidomethyl)	1	1	P10605	P10605	0	2	0.5421	0	1	1	794.88	1588.75	-0.73	-0.00058	3.27655e+06	HCD (High Energy Collision Dissociation)	MS2	0	41.974	39.0182	13722	A001.raw	0/0	2.97					6.42969e+06	39.04
	FALSE	High	Sequest HT (A2)	[R].EQWSNcPTIGQIR.[D]	C6(Carbamidomethyl)	1	1	P10605	P10605	0	2	0.5986	0	1	1	794.88	1588.75	-0.27	-0.00021	293629	HCD (High Energy Collision Dissociation)	MS2	9.50103	80	38.6678	13548	A001.raw	0/0	2.89					1.53274e+06	38.69
	FALSE	High	Sequest HT (A2)	[K].KLcGTVLGGPK.[L]	C3(Carbamidomethyl)	1	1	P10605	P10605	1	2	0.5037	0	1	1	565.324	1129.64	0.35	0.0002	663980	HCD (High Energy Collision Dissociation)	MS2	62.6632	55.697	26.0486	7518	A001.raw	0/0	2.68					1.39523e+06	26.02
	FALSE	High	Sequest HT (A2)	[R].VAFGEDIDLPETFDAR.[E]		1	1	P10605	P10605	0	3	0.6269	0	1	1	598.958	1794.86	2.28	0.00136	548481	HCD (High Energy Collision Dissociation)	MS2	43.8324	80	54.7909	21487	A001.raw	0/0	2.68
	FALSE	High	Sequest HT (A2)	[K].HFGYTSYSVSNSVK.[E]		1	1	P10605	P10605	0	2	0.7799	0	1	1	788.375	1575.74	-0.29	-0.00023	355593	HCD (High Energy Collision Dissociation)	MS2	66.7518	80	33.4952	11039	A001.raw	0/0	2.59					1.90424e+06	33.49
	FALSE	High	Sequest HT (A2)	[K].HFGYTSYSVSNSVK.[E]		1	1	P10605	P10605	0	2	0.7683	0	1	1	788.375	1575.74	-0.37	-0.00029	607954	HCD (High Energy Collision Dissociation)	MS2	0	80	33.1305	10863	A001.raw	0/0	2.46					4.9713e+06	33.07
	FALSE	High	Sequest HT (A2)	[K].KLcGTVLGGPK.[L]	C3(Carbamidomethyl)	1	1	P10605	P10605	1	2	0.4979	0	1	1	565.324	1129.64	0.67	0.00038	1.27965e+06	HCD (High Energy Collision Dissociation)	MS2	36.6615	36.017	25.4543	7239	A001.raw	0/0	2.43					5.01122e+06	25.49
	FALSE	High	Mascot (A6)	[K].NGPVEGAFTVFSDFLTYK.[S]		1	1	P10605	P10605	0	2	1	0	1	1	996.49	1991.97	-0.99	-0.00099	196708	HCD (High Energy Collision Dissociation)	MS2	36.9934	80	73.743	30669	A001.raw	12/204		112	37	22	1.64932e-10
	FALSE	High	Mascot (A6)	[K].NGPVEGAFTVFSDFLTYK.[S]		1	1	P10605	P10605	0	3	1	0	1	1	664.663	1991.97	-0.2	-0.00013	350611	HCD (High Energy Collision Dissociation)	MS2	0	80	74.6887	31118	A001.raw	10/204		103	37	22	1.0816e-09	2.2917e+06	74.68
	FALSE	High	Mascot (A6)	[R].VAFGEDIDLPETFDAR.[E]		1	1	P10605	P10605	0	2	0.9417	0	1	1	897.93	1794.85	-1.39	-0.00125	3.82106e+06	HCD (High Energy Collision Dissociation)	MS2	12.8746	25.694	54.5862	21385	A001.raw	11/120		103	37	22	1.29761e-09	25728841	54.67
	FALSE	High	Mascot (A6)	[R].VAFGEDIDLPETFDAR.[E]		1	1	P10605	P10605	0	2	0.9388	0	1	1	897.93	1794.85	-0.78	-0.0007	5.85225e+06	HCD (High Energy Collision Dissociation)	MS2	4.84073	22.085	54.9407	21562	A001.raw	11/120		98	37	22	3.02942e-09	49452917	54.81
	FALSE	High	Mascot (A6)	[K].HFGYTSYSVSNSVK.[E]		1	1	P10605	P10605	0	2	1	0	1	1	788.375	1575.74	-0.37	-0.00029	607954	HCD (High Energy Collision Dissociation)	MS2	0	80	33.1305	10863	A001.raw	13/116		91	37	21	1.48753e-08	4.9713e+06	33.07
	FALSE	High	Mascot (A6)	[K].NGPVEGAFTVFSDFLTYK.[S]		1	1	P10605	P10605	0	3	1	0	1	1	664.663	1991.98	0.35	0.00023	217444	HCD (High Energy Collision Dissociation)	MS2	0	80	74.3386	30952	A001.raw	9/204		90	38	22	2.2972e-08
	FALSE	High	Mascot (A6)	[K].NGPVEGAFTVFSDFLTYK.[S]		1	1	P10605	P10605	0	2	1	0	1	1	996.49	1991.97	-0.93	-0.00092	866479	HCD (High Energy Collision Dissociation)	MS2	0	80	74.4522	31006	A001.raw	13/204		90	38	22	2.27519e-08	5.73356e+06	74.4
	FALSE	High	Mascot (A6)	[K].NGPVEGAFTVFSDFLTYK.[S]		1	1	P10605	P10605	0	2	1	0	1	1	996.492	1991.98	0.66	0.00066	363450	HCD (High Energy Collision Dissociation)	MS2	2.15451	80	74.8009	31171	A001.raw	15/204		87	37	22	5.10209e-08	1.31053e+06	74.77
	FALSE	High	Mascot (A6)	[R].VAFGEDIDLPETFDAR.[E]		1	1	P10605	P10605	0	2	0.9294	0	1	1	897.93	1794.85	-0.44	-0.00039	1.58939e+06	HCD (High Energy Collision Dissociation)	MS2	11.9143	80	55.2966	21740	A001.raw	10/120		85	37	22	7.14797e-08	5.26386e+06	55.29
	FALSE	High	Mascot (A6)	[K].NGPVEGAFTVFSDFLTYK.[S]		1	1	P10605	P10605	0	3	1	0	1	1	664.664	1991.98	0.54	0.00036	126687	HCD (High Energy Collision Dissociation)	MS2	0	80	73.9957	30789	A001.raw	9/204		83	37	22	1.10973e-07	2.88238e+06	73.95
	FALSE	High	Mascot (A6)	[K].NGPVEGAFTVFSDFLTYK.[S]		1	1	P10605	P10605	0	2	1	0	1	1	996.49	1991.97	-0.87	-0.00086	860347	HCD (High Energy Collision Dissociation)	MS2	4.39802	80	74.1051	30841	A001.raw	12/204		80	38	22	2.40446e-07	1.40557e+07	74.11
	FALSE	High	Mascot (A6)	[K].NGPVEGAFTVFSDFLTYK.[S]		1	1	P10605	P10605	0	2	1	0	1	1	996.492	1991.98	0.79	0.00078	126424	HCD (High Energy Collision Dissociation)	MS2	0	80	75.1516	31336	A001.raw	14/204		72	37	22	1.53726e-06	1.41093e+06	75.12
	FALSE	High	Mascot (A6)	[R].EQWSNcPTIGQIR.[D]	C6(Carbamidomethyl)	1	1	P10605	P10605	0	2	1	0	1	1	794.88	1588.75	-0.5	-0.0004	4915933	HCD (High Energy Collision Dissociation)	MS2	0	30.293	39.3625	13895	A001.raw	8/140		71	36	21	1.52567e-06	1.44945e+07	39.34
	FALSE	High	Mascot (A6)	[R].EQWSNcPTIGQIR.[D]	C6(Carbamidomethyl)	1	1	P10605	P10605	0	2	1	0	1	1	794.88	1588.75	-0.73	-0.00058	3.27655e+06	HCD (High Energy Collision Dissociation)	MS2	0	41.974	39.0182	13722	A001.raw	8/140		71	36	21	1.5047e-06	6.42969e+06	39.04
	FALSE	High	Mascot (A6)	[R].EQWSNcPTIGQIR.[D]	C6(Carbamidomethyl)	1	1	P10605	P10605	0	2	1	0	1	1	794.88	1588.75	-0.04	-3e-05	1.21868e+06	HCD (High Energy Collision Dissociation)	MS2	0	80	39.7199	14071	A001.raw	8/140		71	37	21	1.59379e-06	2.79778e+06	39.73
	FALSE	High	Mascot (A6)	[K].SGVYKHEAGDMMGGHAIR.[I]		1	1	P10605	P10605	1	4	1	0	1	1	479.728	1915.89	0	0	318722	HCD (High Energy Collision Dissociation)	MS2	37.2868	80	26.6956	7828	A001.raw	11/188		63	38	22	1.17197e-05
	FALSE	High	Mascot (A6)	[R].GENHcGIESEIVAGIPR.[T]	C5(Carbamidomethyl)	1	1	P10605	P10605	0	2	1	0	1	1	919.443	1837.88	-4.1	-0.00377	186424	HCD (High Energy Collision Dissociation)	MS2	0	80	44.1048	16203	A001.raw	9/184		61	38	23	2.22536e-05	2.65281e+06	44.11
	FALSE	High	Mascot (A6)	[K].KLcGTVLGGPK.[L]	C3(Carbamidomethyl)	1	1	P10605	P10605	1	2	0.9831	0	1	1	565.324	1129.64	0.67	0.00038	1.27965e+06	HCD (High Energy Collision Dissociation)	MS2	36.6615	36.017	25.4543	7239	A001.raw	10/120		59	33	18	9.47973e-06	5.01122e+06	25.49
	FALSE	High	Mascot (A6)	[R].VAFGEDIDLPETFDAR.[E]		1	1	P10605	P10605	0	2	0.9375	0	1	1	897.93	1794.85	-1.12	-0.001	510690	HCD (High Energy Collision Dissociation)	MS2	54.5447	80	54.2442	21216	A001.raw	8/120		48	37	22	0.000384351	2.17526e+06	54.24
	FALSE	High	Mascot (A6)	[K].HFGYTSYSVSNSVK.[E]		1	1	P10605	P10605	0	2	1	0	1	1	788.375	1575.74	-0.22	-0.00017	120261	HCD (High Energy Collision Dissociation)	MS2	32.5994	80	32.7771	10693	A001.raw	10/116		46	37	21	0.000471015
	FALSE	High	Mascot (A6)	[K].SGVYKHEAGDMMGGHAIR.[I]		1	1	P10605	P10605	1	4	1	0	1	1	479.728	1915.89	-0.7	-0.00034	426846	HCD (High Energy Collision Dissociation)	MS2	43.5318	80	26.3423	7663	A001.raw	12/188		45	38	22	0.000693691	2.52759e+06	26.3
	FALSE	High	Mascot (A6)	[R].NFYNVDISYLK.[K]		1	1	P10605	P10605	0	2	1	0	1	1	688.348	1375.69	-0.26	-0.00018	4.24199e+06	HCD (High Energy Collision Dissociation)	MS2	4.98843	33.619	50.6527	19443	A001.raw	6/120		45	36	20	0.000440482	1.65952e+07	50.61
	FALSE	High	Mascot (A6)	[K].NGPVEGAFTVFSDFLTYK.[S]		1	1	P10605	P10605	0	3	1	0	1	1	664.664	1991.98	1.27	0.00084	106836	HCD (High Energy Collision Dissociation)	MS2	15.4091	80	75.0359	31282	A001.raw	8/204		45	37	22	0.000771413	2.05606e+06	74.95
	FALSE	High	Mascot (A6)	[R].NFYNVDISYLK.[K]		1	1	P10605	P10605	0	2	1	0	1	1	688.348	1375.69	-0.08	-5e-05	2.5395e+06	HCD (High Energy Collision Dissociation)	MS2	23.977	43.693	51.031	19631	A001.raw	6/120		45	35	20	0.000503804
	FALSE	High	Mascot (A6)	[K].LcGTVLGGPKLPGR.[V]	C2(Carbamidomethyl)	1	1	P10605	P10605	1	2	1	0	1	1	712.905	1424.8	-0.76	-0.00054	165993	HCD (High Energy Collision Dissociation)	MS2	0	80	37.0657	12767	A001.raw	9/120		43	30	15	0.000182835
	FALSE	High	Mascot (A6)	[R].GENHcGIESEIVAGIPR.[T]	C5(Carbamidomethyl)	1	1	P10605	P10605	0	3	1	0	1	1	613.301	1837.89	0.81	0.0005	578139	HCD (High Energy Collision Dissociation)	MS2	8.5205	80	44.1887	16244	A001.raw	9/184		42	37	22	0.00154722	8.29314e+06	44.28
	FALSE	High	Mascot (A6)	[R].NFYNVDISYLK.[K]		1	1	P10605	P10605	0	2	1	0	1	1	688.349	1375.69	0.81	0.00056	1.2575e+06	HCD (High Energy Collision Dissociation)	MS2	9.93578	80	50.3039	19271	A001.raw	6/120		41	36	21	0.00129003	4.19456e+06	50.36
	FALSE	High	Mascot (A6)	[K].ILRGENHcGIESEIVAGIPR.[T]	C8(Carbamidomethyl)	1	1	P10605	P10605	1	3	1	0	1	1	740.723	2220.15	-0.38	-0.00028	709828	HCD (High Energy Collision Dissociation)	MS2	37.3338	80	43.7099	16013	A001.raw	9/220		41	36	21	0.00132582	8.32608e+06	43.71
	FALSE	High	Mascot (A6)	[K].EIMAEIYK.[N]		1	1	P10605	P10605	0	2	0.675	0	1	1	498.758	996.508	1.06	0.00053	1.44547e+06	HCD (High Energy Collision Dissociation)	MS2	34.6799	45.251	36.5573	12521	A001.raw	5/56		40	34	19	0.00115621	4.70421e+06	36.65
	FALSE	High	Mascot (A6)	[K].EIMAEIYK.[N]		1	1	P10605	P10605	0	2	0.675	0	1	1	498.757	996.507	-0.35	-0.00017	1.76583e+06	HCD (High Energy Collision Dissociation)	MS2	16.3896	41.838	36.1959	12346	A001.raw	5/56		40	33	18	0.00088272	7.99742e+06	36.26
	FALSE	High	Mascot (A6)	[K].HFGYTSYSVSNSVK.[E]		1	1	P10605	P10605	0	2	1	0	1	1	788.375	1575.74	-0.29	-0.00023	355593	HCD (High Energy Collision Dissociation)	MS2	66.7518	80	33.4952	11039	A001.raw	10/116		38	37	22	0.00334852	1.90424e+06	33.49
	FALSE	High	Mascot (A6)	[K].ILRGENHcGIESEIVAGIPR.[T]	C8(Carbamidomethyl)	1	1	P10605	P10605	1	4	1	0	1	1	555.794	2220.15	-0.85	-0.00047	1.86655e+06	HCD (High Energy Collision Dissociation)	MS2	67.4979	36.409	43.9626	16133	A001.raw	11/220		36	36	21	0.00438206	9.45787e+06	43.94
	FALSE	High	Mascot (A6)	[K].LcGTVLGGPKLPGR.[V]	C2(Carbamidomethyl)	1	1	P10605	P10605	1	2	1	0	1	1	712.907	1424.81	1.81	0.00129	296893	HCD (High Energy Collision Dissociation)	MS2	19.0112	80	36.7011	12591	A001.raw	9/120		33	30	15	0.00219477	1.86257e+06	36.74
FALSE	Master Protein	P63017	Heat shock cognate 71 kDa protein OS=Mus musculus OX=10090 GN=Hspa8 PE=1 SV=1	39.0093	22	88	1	1	646	70.8	5.52	High		High	0	139	18	High	0	1829	20
	Checked	Confidence	Identifying Node	Annotated Sequence	Modifications	# Protein Groups	# Proteins	Master Protein Accessions	Protein Accessions	# Missed Cleavages	Charge	DeltaScore	DeltaCn	Rank	Search Engine Rank	m/z [Da]	MH+ [Da]	DeltaM [ppm]	Deltam/z [Da]	Intensity	Activation Type	MS Order	Isolation Interference [%]	Ion Inject Time [ms]	RT [min]	First Scan	Spectrum File	Ions Matched	XCorr	Ions Score	Identity Strict	Identity Relaxed	Expectation Value	Area	Apex RT [min]
	FALSE	High	Sequest HT (A2)	[R].IINEPTAAAIAYGLDKK.[VG]		1	2	P63017	P63017; P17156	1	3	0.8386	0	1	1	596.669	1787.99	0.56	0.00034	7898062	HCD (High Energy Collision Dissociation)	MS2	2.82368	15.483	44.8216	16560	A001.raw	0/0	4.77					5.35242e+07	44.78
	FALSE	High	Sequest HT (A2)	[R].IINEPTAAAIAYGLDKK.[VG]		1	2	P63017	P63017; P17156	1	2	0.831	0	1	1	894.499	1787.99	0.74	0.00066	645354	HCD (High Energy Collision Dissociation)	MS2	0	80	44.5925	16448	A001.raw	0/0	4.32					1.10791e+07	44.66
	FALSE	High	Sequest HT (A2)	[K].TVTNAVVTVPAYFNDSQR.[Q]		1	1	P63017	P63017	0	2	0.6737	0	1	1	991.501	1982	-1.13	-0.00112	860856	HCD (High Energy Collision Dissociation)	MS2	0	80	47.2425	17768	A001.raw	0/0	4.29					2.99965e+06	47.32
	FALSE	High	Sequest HT (A2)	[R].IINEPTAAAIAYGLDKK.[VG]		1	2	P63017	P63017; P17156	1	3	0.8286	0	1	1	596.669	1787.99	0.46	0.00028	1.80796e+06	HCD (High Energy Collision Dissociation)	MS2	0	47.476	45.1881	16744	A001.raw	0/0	4.26
	FALSE	High	Sequest HT (A2)	[K].TVTNAVVTVPAYFNDSQR.[Q]		1	1	P63017	P63017	0	2	0.7341	0	1	1	991.505	1982	2.13	0.00211	986527	HCD (High Energy Collision Dissociation)	MS2	0	80	46.8875	17591	A001.raw	0/0	4.25					6.27374e+06	46.96
	FALSE	High	Sequest HT (A2)	[R].IINEPTAAAIAYGLDKK.[VG]		1	2	P63017	P63017; P17156	1	2	0.7554	0	1	1	894.498	1787.99	-0.96	-0.00086	592402	HCD (High Energy Collision Dissociation)	MS2	12.8198	80	44.9719	16637	A001.raw	0/0	4.17					6142792	44.96
	FALSE	High	Sequest HT (A2)	[R].IINEPTAAAIAYGLDKK.[VG]		1	2	P63017	P63017; P17156	1	3	0.7603	0	1	1	596.669	1787.99	0.56	0.00034	863838	HCD (High Energy Collision Dissociation)	MS2	49.6727	80	44.4599	16380	A001.raw	0/0	4.13
	FALSE	High	Sequest HT (A2)	[R].ARFEELNADLFR.[G]		1	2	P63017	P63017; P17156	1	3	0.6825	0	1	1	494.258	1480.76	2.54	0.00125	3.55437e+06	HCD (High Energy Collision Dissociation)	MS2	1.87434	36.333	46.9313	17614	A001.raw	0/0	4					2.61374e+07	46.82
	FALSE	High	Sequest HT (A2)	[K].TVTNAVVTVPAYFNDSQR.[Q]		1	1	P63017	P63017	0	2	0.7266	0	1	1	991.502	1982	-0.89	-0.00088	525911	HCD (High Energy Collision Dissociation)	MS2	33.7855	80	47.604	17947	A001.raw	0/0	3.95					5.96794e+06	47.45
	FALSE	High	Sequest HT (A2)	[K].TVTNAVVTVPAYFNDSQR.[Q]		1	1	P63017	P63017	0	2	0.6632	0	1	1	991.498	1981.99	-4.28	-0.00424	190447	HCD (High Energy Collision Dissociation)	MS2	23.6747	80	46.5438	17421	A001.raw	0/0	3.89
	FALSE	High	Sequest HT (A2)	[R].ARFEELNADLFR.[G]		1	2	P63017	P63017; P17156	1	3	0.6535	0	1	1	494.256	1480.75	0.19	9e-05	1462607	HCD (High Energy Collision Dissociation)	MS2	15.7499	80	47.2896	17792	A001.raw	0/0	3.81					8.36312e+06	47.25
	FALSE	High	Sequest HT (A2)	[K].NQVAMNPTNTVFDAK.[R]		1	1	P63017	P63017	0	2	0.7332	0	1	1	825.401	1649.8	0.09	8e-05	985568	HCD (High Energy Collision Dissociation)	MS2	0	80	39.215	13821	A001.raw	0/0	3.71					2.54858e+06	39.14
	FALSE	High	Sequest HT (A2)	[R].IINEPTAAAIAYGLDK.[RKG]		2	4	P20029; P63017	P20029; P63017; P16627; P17156	0	2	0.8333	0	1	1	830.453	1659.9	2.71	0.00225	557092	HCD (High Energy Collision Dissociation)	MS2	20.4684	80	48.4457	18362	A001.raw	0/0	3.6					6.25293e+06	48.4
	FALSE	High	Sequest HT (A2)	[K].NQVAMNPTNTVFDAK.[R]		1	1	P63017	P63017	0	2	0.7647	0	1	1	825.401	1649.79	-0.35	-0.00029	1.66021e+06	HCD (High Energy Collision Dissociation)	MS2	2.80072	80	38.8531	13640	A001.raw	0/0	3.57					4.59204e+06	38.85
	FALSE	High	Sequest HT (A2)	[R].ARFEELNADLFR.[G]		1	2	P63017	P63017; P17156	1	3	0.6364	0	1	1	494.256	1480.75	-0.31	-0.00015	1.85799e+06	HCD (High Energy Collision Dissociation)	MS2	14.1192	74.671	46.5823	17441	A001.raw	0/0	3.52					3.45512e+06	46.51
	FALSE	High	Sequest HT (A2)	[K].DNNLLGKFELTGIPPAPR.[G]		1	1	P63017	P63017	1	3	0.7256	0	1	1	651.359	1952.06	1.27	0.00083	746416	HCD (High Energy Collision Dissociation)	MS2	48.5784	80	55.4733	21829	A001.raw	0/0	3.28					7.43355e+06	55.41
	FALSE	High	Sequest HT (A2)	[R].RFDDAVVQSDMK.[H]		1	1	P63017	P63017	1	2	0.4677	0	1	1	705.838	1410.67	0.83	0.00058	423093	HCD (High Energy Collision Dissociation)	MS2	0	80	30.6641	9700	A001.raw	0/0	3.25
	FALSE	High	Sequest HT (A2)	[K].HWPFMVVNDAGRPK.[V]		1	1	P63017	P63017	0	3	0.6892	0	1	1	551.948	1653.83	-1.89	-0.00104	1.96393e+06	HCD (High Energy Collision Dissociation)	MS2	23.6353	59.639	43.0381	15697	A001.raw	0/0	3.25					6.78277e+06	43.01
	FALSE	High	Sequest HT (A2)	[R].TTPSYVAFTDTER.[L]		2	5	P63017; P17879	Q61696; P63017; P16627; P17879; P17156	0	2	0.6176	0	1	1	744.355	1487.7	0.46	0.00034	963576	HCD (High Energy Collision Dissociation)	MS2	6.2018	80	38.4627	13447	A001.raw	0/0	3.19					6.18765e+06	38.43
	FALSE	High	Sequest HT (A2)	[K].STAGDTHLGGEDFDNR.[M]		1	2	P63017	P63017; P17156	0	2	0.7653	0	1	1	846.365	1691.72	-1.92	-0.00162	129127	HCD (High Energy Collision Dissociation)	MS2	0	80	27.1039	8016	A001.raw	0/0	3.11					1062561	27.07
	FALSE	High	Sequest HT (A2)	[K].NSLESYAFNMK.[A]		1	1	P63017	P63017	0	2	0.791	0	1	1	652.302	1303.6	-1.99	-0.0013	2.42489e+06	HCD (High Energy Collision Dissociation)	MS2	30.863	23.796	43.7265	16021	A001.raw	0/0	3.11					1.14003e+07	43.65
	FALSE	High	Sequest HT (A2)	[K].NSLESYAFNMK.[A]		1	1	P63017	P63017	0	2	0.823	0	1	1	652.302	1303.6	-1.52	-0.00099	1.27462e+06	HCD (High Energy Collision Dissociation)	MS2	37.7462	57.406	43.3848	15862	A001.raw	0/0	3.05					5.13922e+06	43.36
	FALSE	High	Sequest HT (A2)	[K].NQVAMNPTNTVFDAK.[R]		1	1	P63017	P63017	0	2	0.7043	0	1	1	825.402	1649.8	0.46	0.00038	263542	HCD (High Energy Collision Dissociation)	MS2	0	80	39.5713	13998	A001.raw	0/0	3.01
	FALSE	High	Sequest HT (A2)	[R].RFDDAVVQSDMK.[H]		1	1	P63017	P63017	1	2	0.4816	0	1	1	705.839	1410.67	1.18	0.00083	530533	HCD (High Energy Collision Dissociation)	MS2	0	80	31.0235	9872	A001.raw	0/0	2.99					1.18675e+06	31
	FALSE	High	Sequest HT (A2)	[K].NQVAMNPTNTVFDAK.[R]		1	1	P63017	P63017	0	2	0.6438	0	1	1	825.399	1649.79	-2.13	-0.00175	540237	HCD (High Energy Collision Dissociation)	MS2	52.9686	80	38.5109	13471	A001.raw	0/0	2.92
	FALSE	High	Sequest HT (A2)	[K].DAGTIAGLNVLR.[I]		1	1	P63017	P63017	0	2	0.7396	0	1	1	600.34	1199.67	-0.83	-0.0005	6795511	HCD (High Energy Collision Dissociation)	MS2	6.87209	11.216	46.3424	17322	A001.raw	0/0	2.88					2.58032e+07	46.38
	FALSE	High	Sequest HT (A2)	[R].TTPSYVAFTDTER.[L]		2	5	P63017; P17879	Q61696; P63017; P16627; P17879; P17156	0	2	0.6167	0	1	1	744.354	1487.7	-0.85	-0.00063	4.01215e+06	HCD (High Energy Collision Dissociation)	MS2	0	44.961	37.7452	13100	A001.raw	0/0	2.87					7.71248e+06	37.74
	FALSE	High	Sequest HT (A2)	[R].TTPSYVAFTDTER.[L]		2	5	P63017; P17879	Q61696; P63017; P16627; P17879; P17156	0	2	0.6228	0	1	1	744.354	1487.7	-0.77	-0.00057	3.71133e+06	HCD (High Energy Collision Dissociation)	MS2	0	31.492	38.1002	13268	A001.raw	0/0	2.81					6.5291e+06	38.06
	FALSE	High	Sequest HT (A2)	[K].DAGTIAGLNVLR.[I]		1	1	P63017	P63017	0	2	0.7216	0	1	1	600.342	1199.68	1.92	0.00115	2.54862e+06	HCD (High Energy Collision Dissociation)	MS2	11.1187	41.352	46.7783	17537	A001.raw	0/0	2.73					6496209	46.81
	FALSE	High	Sequest HT (A2)	[K].SFYPEEVSSMVLTK.[M]		1	1	P63017	P63017	0	2	0.7243	0	1	1	808.898	1616.79	0.61	0.00049	2.04489e+06	HCD (High Energy Collision Dissociation)	MS2	10.58	66.51	51.9607	20090	A001.raw	0/0	2.72					1.14605e+07	51.93
	FALSE	High	Sequest HT (A2)	[K].MKEIAEAYLGK.[TA]		1	1	P63017	P63017	1	3	0.6336	0	1	1	418.225	1252.66	-0.46	-0.00019	674185	HCD (High Energy Collision Dissociation)	MS2	32.5411	80	33.4061	10995	A001.raw	0/0	2.62					3.07936e+06	33.41
	FALSE	High	Sequest HT (A2)	[R].FEELNADLFR.[G]		1	2	P63017	P63017; P17156	0	2	0.7672	0	1	1	627.311	1253.62	-0.54	-0.00034	790118	HCD (High Energy Collision Dissociation)	MS2	6.92392	80	49.7103	18983	A001.raw	0/0	2.62					2.10578e+06	49.71
	FALSE	High	Sequest HT (A2)	[R].MVNHFIAEFK.[R]		1	1	P63017	P63017	0	3	0.6538	0	1	1	412.546	1235.62	-0.22	-9e-05	1241537	HCD (High Energy Collision Dissociation)	MS2	11.5891	41.026	40.3114	14360	A001.raw	0/0	2.6					8.73506e+06	40.33
	FALSE	High	Sequest HT (A2)	[K].SFYPEEVSSMVLTK.[M]		1	1	P63017	P63017	0	2	0.7137	0	1	1	808.896	1616.78	-1.96	-0.00158	1.08135e+06	HCD (High Energy Collision Dissociation)	MS2	6.4885	80	52.3073	20260	A001.raw	0/0	2.55					9.84376e+06	52.2
	FALSE	High	Sequest HT (A2)	[K].MKEIAEAYLGK.[TA]		1	1	P63017	P63017	1	2	0.75	0	1	1	626.833	1252.66	-0.89	-0.00056	1533595	HCD (High Energy Collision Dissociation)	MS2	10.9935	80	33.7112	11143	A001.raw	0/0	2.48					5.08526e+06	33.7
	FALSE	High	Sequest HT (A2)	[K].NSLESYAFNMK.[A]		1	1	P63017	P63017	0	2	0.7339	0	1	1	652.302	1303.6	-0.77	-0.0005	1.13684e+06	HCD (High Energy Collision Dissociation)	MS2	49.8883	47.465	44.0803	16191	A001.raw	0/0	2.48					3.02641e+06	44.07
	FALSE	High	Sequest HT (A2)	[K].LLQDFFNGK.[E]		1	2	P63017	P63017; P17156	0	2	0.5605	0	1	1	541.287	1081.57	-0.56	-0.0003	1.48482e+06	HCD (High Energy Collision Dissociation)	MS2	21.9407	70.27	46.8285	17562	A001.raw	0/0	2.48					1.41108e+07	46.69
	FALSE	High	Sequest HT (A2)	[K].SFYPEEVSSMVLTK.[M]		1	1	P63017	P63017	0	2	0.6458	0	1	1	808.897	1616.79	-0.15	-0.00012	2.28921e+06	HCD (High Energy Collision Dissociation)	MS2	3.63047	63.586	51.6065	19915	A001.raw	0/0	2.4					1.13501e+07	51.47
	FALSE	High	Sequest HT (A2)	[K].LLQDFFNGK.[E]		1	2	P63017	P63017; P17156	0	2	0.5274	0	1	1	541.288	1081.57	0.91	0.00049	1374334	HCD (High Energy Collision Dissociation)	MS2	14.9352	80	46.4726	17384	A001.raw	0/0	2.37					1.09978e+07	46.49
	FALSE	High	Sequest HT (A2)	[R].FEELNADLFR.[G]		1	2	P63017	P63017; P17156	0	2	0.813	0	1	1	627.313	1253.62	2.58	0.00162	518254	HCD (High Energy Collision Dissociation)	MS2	40.1369	80	50.0641	19157	A001.raw	0/0	2.3					4.08563e+06	49.97
	FALSE	High	Sequest HT (A2)	[K].VcNPIITK.[L]	C2(Carbamidomethyl)	1	1	P63017	P63017	0	2	0.6638	0	1	1	472.766	944.524	0.58	0.00027	2.15349e+06	HCD (High Energy Collision Dissociation)	MS2	20.984	33.283	26.0866	7537	A001.raw	0/0	2.29					2.70378e+06	26.06
	FALSE	High	Sequest HT (A2)	[K].DAGTIAGLNVLR.[I]		1	1	P63017	P63017	0	2	0.6909	0	1	1	600.341	1199.67	0.49	0.0003	1.25366e+06	HCD (High Energy Collision Dissociation)	MS2	14.2825	80	45.982	17143	A001.raw	0/0	2.2					3.44721e+06	45.95
	FALSE	High	Sequest HT (A2)	[K].MKEIAEAYLGK.[TA]		1	1	P63017	P63017	1	2	0.6977	0	1	1	626.834	1252.66	-0.01	-1e-05	614157	HCD (High Energy Collision Dissociation)	MS2	45.4656	80	34.0534	11313	A001.raw	0/0	2.15
	FALSE	High	Sequest HT (A2)	[K].VcNPIITK.[L]	C2(Carbamidomethyl)	1	1	P63017	P63017	0	2	0.6425	0	1	1	472.765	944.523	-0.26	-0.00012	2.35415e+06	HCD (High Energy Collision Dissociation)	MS2	18.4685	32.491	26.4229	7699	A001.raw	0/0	2.07					6.81799e+06	26.37
	FALSE	High	Mascot (A6)	[K].TVTNAVVTVPAYFNDSQR.[Q]		1	1	P63017	P63017	0	2	1	0	1	1	991.505	1982	2.13	0.00211	986527	HCD (High Energy Collision Dissociation)	MS2	0	80	46.8875	17591	A001.raw	11/192		91	36	20	1.09608e-08	6.27374e+06	46.96
	FALSE	High	Mascot (A6)	[R].IINEPTAAAIAYGLDK.[RKG]		2	5	P20029; P63017	P20029; P63017; P16627; Q504P4; P17156	0	2	1	0	1	1	830.453	1659.9	2.71	0.00225	557092	HCD (High Energy Collision Dissociation)	MS2	20.4684	80	48.4457	18362	A001.raw	10/172		89	34	19	1.41191e-08	6.25293e+06	48.4
	FALSE	High	Mascot (A6)	[R].TTPSYVAFTDTER.[L]		2	8	P63017; P17879	Q61696; D3YW43; D3Z5E2; P63017; P16627; Q504P4; P17879; P17156	0	2	1	0	1	1	744.355	1487.7	0.46	0.00034	963576	HCD (High Energy Collision Dissociation)	MS2	6.2018	80	38.4627	13447	A001.raw	9/96		84	37	21	7.51915e-08	6.18765e+06	38.43
	FALSE	High	Mascot (A6)	[R].FEELNADLFR.[G]		1	3	P63017	P63017; Q504P4; P17156	0	2	0.9367	0	1	1	627.311	1253.62	-0.54	-0.00034	790118	HCD (High Energy Collision Dissociation)	MS2	6.92392	80	49.7103	18983	A001.raw	9/92		79	36	21	2.05366e-07	2.10578e+06	49.71
	FALSE	High	Mascot (A6)	[R].FEELNADLFR.[G]		1	3	P63017	P63017; Q504P4; P17156	0	2	0.9733	0	1	1	627.313	1253.62	2.58	0.00162	518254	HCD (High Energy Collision Dissociation)	MS2	40.1369	80	50.0641	19157	A001.raw	8/92		75	37	22	6.76786e-07	4.08563e+06	49.97
	FALSE	High	Mascot (A6)	[R].RFDDAVVQSDMK.[H]		1	4	P63017	D3YW43; D3Z5E2; P63017; Q504P4	1	2	0.8514	0	1	1	705.838	1410.67	0.83	0.00058	423093	HCD (High Energy Collision Dissociation)	MS2	0	80	30.6641	9700	A001.raw	9/132		74	37	22	7.87161e-07
	FALSE	High	Mascot (A6)	[K].NQVAMNPTNTVFDAK.[R]		1	4	P63017	D3YW43; D3Z5E2; P63017; Q504P4	0	2	1	0	1	1	825.401	1649.79	-0.35	-0.00029	1.66021e+06	HCD (High Energy Collision Dissociation)	MS2	2.80072	80	38.8531	13640	A001.raw	13/168		74	37	22	9.06259e-07	4.59204e+06	38.85
	FALSE	High	Mascot (A6)	[R].IINEPTAAAIAYGLDKK.[VG]		1	3	P63017	P63017; Q504P4; P17156	1	2	1	0	1	1	894.498	1787.99	-0.96	-0.00086	592402	HCD (High Energy Collision Dissociation)	MS2	12.8198	80	44.9719	16637	A001.raw	11/184		72	32	17	4.09331e-07	6142792	44.96
	FALSE	High	Mascot (A6)	[R].IINEPTAAAIAYGLDKK.[VG]		1	3	P63017	P63017; Q504P4; P17156	1	2	1	0	1	1	894.499	1787.99	0.74	0.00066	645354	HCD (High Energy Collision Dissociation)	MS2	0	80	44.5925	16448	A001.raw	12/184		72	32	16	3.93328e-07	1.10791e+07	44.66
	FALSE	High	Mascot (A6)	[K].NQVAMNPTNTVFDAK.[R]		1	4	P63017	D3YW43; D3Z5E2; P63017; Q504P4	0	2	1	0	1	1	825.401	1649.8	0.09	8e-05	985568	HCD (High Energy Collision Dissociation)	MS2	0	80	39.215	13821	A001.raw	13/168		70	37	21	1.85637e-06	2.54858e+06	39.14
	FALSE	High	Mascot (A6)	[K].TVTNAVVTVPAYFNDSQR.[Q]		1	1	P63017	P63017	0	2	1	0	1	1	991.502	1982	-0.89	-0.00088	525911	HCD (High Energy Collision Dissociation)	MS2	33.7855	80	47.604	17947	A001.raw	9/192		67	36	21	3.84011e-06	5.96794e+06	47.45
	FALSE	High	Mascot (A6)	[R].RFDDAVVQSDMK.[H]		1	4	P63017	D3YW43; D3Z5E2; P63017; Q504P4	1	2	0.9231	0	1	1	705.839	1410.67	1.18	0.00083	530533	HCD (High Energy Collision Dissociation)	MS2	0	80	31.0235	9872	A001.raw	9/132		65	36	21	4.77218e-06	1.18675e+06	31
	FALSE	High	Mascot (A6)	[R].IINEPTAAAIAYGLDKK.[VG]		1	3	P63017	P63017; Q504P4; P17156	1	3	1	0	1	1	596.669	1787.99	0.46	0.00028	1.80796e+06	HCD (High Energy Collision Dissociation)	MS2	0	47.476	45.1881	16744	A001.raw	11/184		61	31	16	4.49937e-06
	FALSE	High	Mascot (A6)	[R].ARFEELNADLFR.[G]		1	3	P63017	P63017; Q504P4; P17156	1	3	1	0	1	1	494.256	1480.75	0.19	9e-05	1462607	HCD (High Energy Collision Dissociation)	MS2	15.7499	80	47.2896	17792	A001.raw	12/128		60	36	21	1.90477e-05	8.36312e+06	47.25
	FALSE	High	Mascot (A6)	[R].IINEPTAAAIAYGLDKK.[VG]		1	3	P63017	P63017; Q504P4; P17156	1	3	1	0	1	1	596.669	1787.99	0.56	0.00034	7898062	HCD (High Energy Collision Dissociation)	MS2	2.82368	15.483	44.8216	16560	A001.raw	11/184		60	32	16	6.34973e-06	5.35242e+07	44.78
	FALSE	High	Mascot (A6)	[K].SFYPEEVSSMVLTK.[M]		1	2	P63017	P63017; Q504P4	0	2	1	0	1	1	808.898	1616.79	0.61	0.00049	2.04489e+06	HCD (High Energy Collision Dissociation)	MS2	10.58	66.51	51.9607	20090	A001.raw	9/104		56	37	22	5.93491e-05	1.14605e+07	51.93
	FALSE	High	Mascot (A6)	[K].SFYPEEVSSMVLTK.[M]		1	2	P63017	P63017; Q504P4	0	2	1	0	1	1	808.897	1616.79	-0.15	-0.00012	2.28921e+06	HCD (High Energy Collision Dissociation)	MS2	3.63047	63.586	51.6065	19915	A001.raw	9/104		56	37	21	5.52924e-05	1.13501e+07	51.47
	FALSE	High	Mascot (A6)	[R].IINEPTAAAIAYGLDKK.[VG]		1	3	P63017	P63017; Q504P4; P17156	1	3	1	0	1	1	596.669	1787.99	0.56	0.00034	863838	HCD (High Energy Collision Dissociation)	MS2	49.6727	80	44.4599	16380	A001.raw	12/184		55	32	16	1.72487e-05
	FALSE	High	Mascot (A6)	[K].SFYPEEVSSMVLTK.[M]		1	2	P63017	P63017; Q504P4	0	2	1	0	1	1	808.896	1616.78	-1.96	-0.00158	1.08135e+06	HCD (High Energy Collision Dissociation)	MS2	6.4885	80	52.3073	20260	A001.raw	9/104		55	36	21	5.65342e-05	9.84376e+06	52.2
	FALSE	High	Mascot (A6)	[K].TVTNAVVTVPAYFNDSQR.[Q]		1	1	P63017	P63017	0	2	1	0	1	1	991.501	1982	-1.13	-0.00112	860856	HCD (High Energy Collision Dissociation)	MS2	0	80	47.2425	17768	A001.raw	10/192		52	36	21	0.000111861	2.99965e+06	47.32
	FALSE	High	Mascot (A6)	[R].ARFEELNADLFR.[G]		1	3	P63017	P63017; Q504P4; P17156	1	3	1	0	1	1	494.258	1480.76	2.54	0.00125	3.55437e+06	HCD (High Energy Collision Dissociation)	MS2	1.87434	36.333	46.9313	17614	A001.raw	12/128		52	36	21	0.000114135	2.61374e+07	46.82
	FALSE	High	Mascot (A6)	[R].RFDDAVVQSDMK.[H]		1	4	P63017	D3YW43; D3Z5E2; P63017; Q504P4	1	2	0.76	0	1	1	705.839	1410.67	2.3	0.00162	243324	HCD (High Energy Collision Dissociation)	MS2	0	80	30.2919	9527	A001.raw	7/132		50	36	21	0.000170731	2.71252e+06	30.29
	FALSE	High	Mascot (A6)	[K].DAGTIAGLNVLR.[I]		1	2	P63017	P63017; Q504P4	0	2	1	0	1	1	600.34	1199.67	-0.83	-0.0005	6795511	HCD (High Energy Collision Dissociation)	MS2	6.87209	11.216	46.3424	17322	A001.raw	6/100		50	34	19	9.89427e-05	2.58032e+07	46.38
	FALSE	High	Mascot (A6)	[K].MKEIAEAYLGK.[TA]		1	2	P63017	P63017; Q504P4	1	2	1	0	1	1	626.833	1252.66	-0.89	-0.00056	1533595	HCD (High Energy Collision Dissociation)	MS2	10.9935	80	33.7112	11143	A001.raw	10/116		50	34	19	0.000107924	5.08526e+06	33.7
	FALSE	High	Mascot (A6)	[K].LLQDFFNGK.[E]		1	3	P63017	P63017; Q504P4; P17156	0	2	0.96	0	1	1	541.288	1081.57	0.91	0.00049	1374334	HCD (High Energy Collision Dissociation)	MS2	14.9352	80	46.4726	17384	A001.raw	7/88		50	36	20	0.000165392	1.09978e+07	46.49
	FALSE	High	Mascot (A6)	[K].NQVAMNPTNTVFDAK.[R]		1	4	P63017	D3YW43; D3Z5E2; P63017; Q504P4	0	2	1	0	1	1	825.402	1649.8	0.46	0.00038	263542	HCD (High Energy Collision Dissociation)	MS2	0	80	39.5713	13998	A001.raw	11/168		49	37	21	0.000245847
	FALSE	High	Mascot (A6)	[R].RFDDAVVQSDMK.[H]		1	4	P63017	D3YW43; D3Z5E2; P63017; Q504P4	1	3	1	0	1	1	470.896	1410.67	3.65	0.00172	391835	HCD (High Energy Collision Dissociation)	MS2	38.2088	80	30.6043	9674	A001.raw	10/132		49	37	21	0.000267852	2.60507e+06	30.51
	FALSE	High	Mascot (A6)	[R].ARFEELNADLFR.[G]		1	3	P63017	P63017; Q504P4; P17156	1	3	1	0	1	1	494.256	1480.75	-0.31	-0.00015	1.85799e+06	HCD (High Energy Collision Dissociation)	MS2	14.1192	74.671	46.5823	17441	A001.raw	10/128		47	36	21	0.000317715	3.45512e+06	46.51
	FALSE	High	Mascot (A6)	[K].LLQDFFNGK.[E]		1	3	P63017	P63017; Q504P4; P17156	0	2	0.9565	0	1	1	541.287	1081.57	-0.56	-0.0003	1.48482e+06	HCD (High Energy Collision Dissociation)	MS2	21.9407	70.27	46.8285	17562	A001.raw	7/88		46	36	21	0.000375592	1.41108e+07	46.69
	FALSE	High	Mascot (A6)	[K].DAGTIAGLNVLR.[I]		1	2	P63017	P63017; Q504P4	0	2	1	0	1	1	600.342	1199.68	1.92	0.00115	2.54862e+06	HCD (High Energy Collision Dissociation)	MS2	11.1187	41.352	46.7783	17537	A001.raw	10/100		46	34	19	0.00031491	6496209	46.81
	FALSE	High	Mascot (A6)	[K].DNNLLGKFELTGIPPAPR.[G]		1	2	P63017	P63017; Q504P4	1	3	1	0	1	1	651.359	1952.06	0.71	0.00046	272939	HCD (High Energy Collision Dissociation)	MS2	0	80	55.1071	21646	A001.raw	12/200		45	33	18	0.000257776	4.70006e+06	55.15
	FALSE	High	Mascot (A6)	[K].GPAVGIDLGTTYScVGVFQHGK.[V]	C14(Carbamidomethyl)	1	4	P63017	D3YW43; D3Z5E2; P63017; Q504P4	0	3	1	0	1	1	755.046	2263.12	1.97	0.00149	385323	HCD (High Energy Collision Dissociation)	MS2	21.0075	80	50.2867	19263	A001.raw	9/180		44	37	22	0.000845221	4.91997e+06	50.25
	FALSE	High	Mascot (A6)	[K].STAGDTHLGGEDFDNR.[M]		1	3	P63017	P63017; Q504P4; P17156	0	2	1	0	1	1	846.365	1691.72	-1.92	-0.00162	129127	HCD (High Energy Collision Dissociation)	MS2	0	80	27.1039	8016	A001.raw	9/124		43	36	21	0.00082274	1062561	27.07
	FALSE	High	Mascot (A6)	[K].TVTNAVVTVPAYFNDSQR.[Q]		1	1	P63017	P63017	0	2	1	0	1	1	991.498	1981.99	-4.28	-0.00424	190447	HCD (High Energy Collision Dissociation)	MS2	23.6747	80	46.5438	17421	A001.raw	9/192		43	37	21	0.000913892
	FALSE	High	Mascot (A6)	[R].TTPSYVAFTDTER.[L]		2	8	P63017; P17879	Q61696; D3YW43; D3Z5E2; P63017; P16627; Q504P4; P17879; P17156	0	2	0.9767	0	1	1	744.354	1487.7	-0.77	-0.00057	3.71133e+06	HCD (High Energy Collision Dissociation)	MS2	0	31.492	38.1002	13268	A001.raw	9/96		43	36	21	0.000914998	6.5291e+06	38.06
	FALSE	High	Mascot (A6)	[K].DNNLLGKFELTGIPPAPR.[G]		1	2	P63017	P63017; Q504P4	1	3	1	0	1	1	651.359	1952.06	1.27	0.00083	746416	HCD (High Energy Collision Dissociation)	MS2	48.5784	80	55.4733	21829	A001.raw	12/200		42	33	18	0.00063356	7.43355e+06	55.41
	FALSE	High	Mascot (A6)	[K].NQVAMNPTNTVFDAKR.[L]		1	4	P63017	D3YW43; D3Z5E2; P63017; Q504P4	1	3	1	0	1	1	602.636	1805.89	-2	-0.00121	943214	HCD (High Energy Collision Dissociation)	MS2	14.697	80	35.6402	12081	A001.raw	8/180		42	37	21	0.00135945	2.1629e+06	35.62
	FALSE	High	Mascot (A6)	[K].NSLESYAFNMK.[A]		1	2	P63017	P63017; Q504P4	0	2	1	0	1	1	652.302	1303.6	-1.99	-0.0013	2.42489e+06	HCD (High Energy Collision Dissociation)	MS2	30.863	23.796	43.7265	16021	A001.raw	6/120		41	36	21	0.00127795	1.14003e+07	43.65
	FALSE	High	Mascot (A6)	[R].LSKEDIER.[M]		1	2	P63017	P63017; Q504P4	1	2	0.7073	0	1	1	495.266	989.526	-0.59	-0.00029	111741	HCD (High Energy Collision Dissociation)	MS2	41.6063	80	19.2111	4419	A001.raw	6/76		41	35	20	0.00105461	150062	19.21
	FALSE	High	Mascot (A6)	[R].TTPSYVAFTDTER.[L]		2	8	P63017; P17879	Q61696; D3YW43; D3Z5E2; P63017; P16627; Q504P4; P17879; P17156	0	2	0.9756	0	1	1	744.354	1487.7	-0.85	-0.00063	4.01215e+06	HCD (High Energy Collision Dissociation)	MS2	0	44.961	37.7452	13100	A001.raw	8/96		41	36	21	0.00157188	7.71248e+06	37.74
	FALSE	High	Mascot (A6)	[K].NQVAMNPTNTVFDAK.[R]		1	4	P63017	D3YW43; D3Z5E2; P63017; Q504P4	0	2	1	0	1	1	825.399	1649.79	-2.13	-0.00175	540237	HCD (High Energy Collision Dissociation)	MS2	52.9686	80	38.5109	13471	A001.raw	9/168		39	37	22	0.00233812
	FALSE	High	Mascot (A6)	[R].MVNHFIAEFK.[R]		1	2	P63017	P63017; Q504P4	0	3	1	0	1	1	412.546	1235.62	-0.14	-6e-05	914097	HCD (High Energy Collision Dissociation)	MS2	24.2057	80	40.6622	14533	A001.raw	5/100		39	36	20	0.002006	4.68419e+06	40.62
	FALSE	High	Mascot (A6)	[K].NSLESYAFNMK.[A]		1	2	P63017	P63017; Q504P4	0	2	1	0	1	1	652.302	1303.6	-1.52	-0.00099	1.27462e+06	HCD (High Energy Collision Dissociation)	MS2	37.7462	57.406	43.3848	15862	A001.raw	8/120		38	36	21	0.00248249	5.13922e+06	43.36
	FALSE	High	Mascot (A6)	[RK].VEIIANDQGNR.[IT]		3	9	P20029; P63017; P17879	P20029; Q61696; D3YW43; D3Z5E2; P63017; P16627; Q504P4; P17879; P17156	0	2	0.8	0	1	1	614.818	1228.63	0.84	0.00052	212894	HCD (High Energy Collision Dissociation)	MS2	28.8776	80	24.6778	6876	A001.raw	6/100		35	35	20	0.00361718
FALSE	Master Protein	P10107	Annexin A1 OS=Mus musculus GN=Anxa1 PE=1 SV=2	36.4162	13	57	12	1	346	38.7	7.37	High		High	0	87.96	11	High	0	1531	11
	Checked	Confidence	Identifying Node	Annotated Sequence	Modifications	# Protein Groups	# Proteins	Master Protein Accessions	Protein Accessions	# Missed Cleavages	Charge	DeltaScore	DeltaCn	Rank	Search Engine Rank	m/z [Da]	MH+ [Da]	DeltaM [ppm]	Deltam/z [Da]	Intensity	Activation Type	MS Order	Isolation Interference [%]	Ion Inject Time [ms]	RT [min]	First Scan	Spectrum File	Ions Matched	XCorr	Ions Score	Identity Strict	Identity Relaxed	Expectation Value	Area	Apex RT [min]
	FALSE	High	Sequest HT (A2)	[K].ALTGHLEEVVLAMLK.[T]		1	1	P10107	P10107	0	3	0.7868	0	1	1	541.977	1623.92	1.59	0.00086	691856	HCD (High Energy Collision Dissociation)	MS2	0	80	67.4413	27663	A001.raw	0/0	4.55					7.77271e+06	67.42
	FALSE	High	Sequest HT (A2)	[R].KALTGHLEEVVLAMLK.[T]		1	1	P10107	P10107	1	3	0.805	0	1	1	584.674	1752.01	-0.65	-0.00038	378905	HCD (High Energy Collision Dissociation)	MS2	26.1399	80	61.7367	24916	A001.raw	0/0	4.41					3.94765e+06	61.74
	FALSE	High	Sequest HT (A2)	[K].ALTGHLEEVVLAMLK.[T]		1	1	P10107	P10107	0	2	0.7523	0	1	1	812.461	1623.91	0.69	0.00056	208713	HCD (High Energy Collision Dissociation)	MS2	34.4753	80	67.2875	27590	A001.raw	0/0	4.32					1.54684e+06	67.27
	FALSE	High	Sequest HT (A2)	[R].KALTGHLEEVVLAMLK.[T]		1	1	P10107	P10107	1	3	0.7764	0	1	1	584.675	1752.01	0.39	0.00023	461596	HCD (High Energy Collision Dissociation)	MS2	11.7284	80	62.0953	25089	A001.raw	0/0	4.16					3.07724e+06	61.97
	FALSE	High	Sequest HT (A2)	[K].GLGTDEDTLIEILTTR.[S]		1	1	P10107	P10107	0	2	0.7421	0	1	1	873.959	1746.91	-0.67	-0.00059	1.15342e+06	HCD (High Energy Collision Dissociation)	MS2	9.02917	80	66.6375	27279	A001.raw	0/0	4.11					8.75968e+06	66.55
	FALSE	High	Sequest HT (A2)	[K].YGISLcQAILDETKGDYEK.[I]	C6(Carbamidomethyl)	1	1	P10107	P10107	1	3	0.7301	0	1	1	735.023	2203.05	-1.93	-0.00142	541994	HCD (High Energy Collision Dissociation)	MS2	11.8659	80	53.6806	20937	A001.raw	0/0	3.89					4.5038e+06	53.52
	FALSE	High	Sequest HT (A2)	[R].KALTGHLEEVVLAMLK.[T]		1	1	P10107	P10107	1	3	0.7639	0	1	1	584.674	1752.01	-1.28	-0.00075	198660	HCD (High Energy Collision Dissociation)	MS2	14.7992	80	62.4632	25268	A001.raw	0/0	3.77					1.54367e+06	62.4
	FALSE	High	Sequest HT (A2)	[K].GVDEATIIDILTK.[R]		1	1	P10107	P10107	0	2	0.784	0	1	1	694.389	1387.77	1.75	0.00121	1.08933e+06	HCD (High Energy Collision Dissociation)	MS2	5.59569	80	62.0266	25056	A001.raw	0/0	3.75					6.30413e+06	61.94
	FALSE	High	Sequest HT (A2)	[K].GVDEATIIDILTKR.[T]		1	1	P10107	P10107	1	2	0.6986	0	1	1	772.436	1543.86	-2.88	-0.00222	974579	HCD (High Energy Collision Dissociation)	MS2	28.0031	80	58.788	23474	A001.raw	0/0	3.65					3.7171e+06	58.78
	FALSE	High	Sequest HT (A2)	[K].ALTGHLEEVVLAMLK.[T]		1	1	P10107	P10107	0	2	0.7812	0	1	1	812.46	1623.91	-0.96	-0.00078	145375	HCD (High Energy Collision Dissociation)	MS2	36.1481	80	68.0014	27931	A001.raw	0/0	3.61					657222	67.95
	FALSE	High	Sequest HT (A2)	[K].GVDEATIIDILTKR.[T]		1	1	P10107	P10107	1	2	0.7734	0	1	1	772.441	1543.87	3.68	0.00284	447818	HCD (High Energy Collision Dissociation)	MS2	21.6433	80	58.4294	23299	A001.raw	0/0	3.53					3.13282e+06	58.43
	FALSE	High	Sequest HT (A2)	[K].GVDEATIIDILTKR.[T]		1	1	P10107	P10107	1	3	0.7983	0	1	1	515.295	1543.87	0.43	0.00022	579706	HCD (High Energy Collision Dissociation)	MS2	44.9299	80	58.4596	23314	A001.raw	0/0	3.47					7.87027e+06	58.45
	FALSE	High	Sequest HT (A2)	[K].ALTGHLEEVVLAMLK.[T]		1	1	P10107	P10107	0	3	0.7906	0	1	1	541.976	1623.91	0.57	0.00031	236244	HCD (High Energy Collision Dissociation)	MS2	0	80	67.7882	27829	A001.raw	0/0	3.39
	FALSE	High	Sequest HT (A2)	[K].ALTGHLEEVVLAMLK.[T]		1	1	P10107	P10107	0	3	0.7831	0	1	1	541.977	1623.92	1.47	0.0008	358556	HCD (High Energy Collision Dissociation)	MS2	7.26721	80	68.1321	27993	A001.raw	0/0	3.32					7.67347e+06	68.02
	FALSE	High	Sequest HT (A2)	[K].GVDEATIIDILTKR.[T]		1	1	P10107	P10107	1	3	0.8154	0	1	1	515.295	1543.87	1.74	0.00089	1204237	HCD (High Energy Collision Dissociation)	MS2	16.1197	80	58.8125	23486	A001.raw	0/0	3.25					2.27569e+07	58.75
	FALSE	High	Sequest HT (A2)	[K].GTDVNVFTTILTSR.[S]		1	1	P10107	P10107	0	2	0.7413	0	1	1	762.407	1523.81	-0.13	-0.0001	473715	HCD (High Energy Collision Dissociation)	MS2	4.36289	80	58.0516	23113	A001.raw	0/0	3.17					6.84574e+06	58.01
	FALSE	High	Sequest HT (A2)	[K].GLGTDEDTLIEILTTR.[S]		1	1	P10107	P10107	0	2	0.6465	0	1	1	873.962	1746.92	2.68	0.00234	71017.2	HCD (High Energy Collision Dissociation)	MS2	20.0213	80	66.2739	27106	A001.raw	0/0	3.14
	FALSE	High	Sequest HT (A2)	[K].GVDEATIIDILTK.[R]		1	1	P10107	P10107	0	2	0.7394	0	1	1	694.389	1387.77	2.27	0.00158	629125	HCD (High Energy Collision Dissociation)	MS2	0	80	61.6628	24880	A001.raw	0/0	3.07					6.54116e+06	61.59
	FALSE	High	Sequest HT (A2)	[K].GLGTDEDTLIEILTTR.[S]		1	1	P10107	P10107	0	3	0.777	0	1	1	582.975	1746.91	-0.4	-0.00023	582756	HCD (High Energy Collision Dissociation)	MS2	17.2387	80	66.8275	27370	A001.raw	0/0	3.05					9.99253e+06	66.68
	FALSE	High	Sequest HT (A2)	[R].RKGTDVNVFTTILTSR.[S]		1	1	P10107	P10107	2	3	0.7614	0	1	1	603.341	1808.01	3.72	0.00224	772862	HCD (High Energy Collision Dissociation)	MS2	31.3722	80	48.1489	18216	A001.raw	0/0	2.85					9.92115e+06	48.13
	FALSE	High	Sequest HT (A2)	[R].FLENQEQEYVQAVK.[S]		1	1	P10107	P10107	0	2	0.6703	0	1	1	862.926	1724.85	-2.3	-0.00199	804774	HCD (High Energy Collision Dissociation)	MS2	0	80	39.8999	14160	A001.raw	0/0	2.76					6.24856e+06	39.86
	FALSE	High	Sequest HT (A2)	[K].GTDVNVFTTILTSR.[S]		1	1	P10107	P10107	0	2	0.7815	0	1	1	762.406	1523.8	-1.57	-0.0012	284292	HCD (High Energy Collision Dissociation)	MS2	21.715	80	58.6225	23394	A001.raw	0/0	2.7					2.58422e+06	58.66
	FALSE	High	Sequest HT (A2)	[R].KGTDVNVFTTILTSR.[S]		1	1	P10107	P10107	1	3	0.6729	0	1	1	551.305	1651.9	-0.68	-0.00037	510372	HCD (High Energy Collision Dissociation)	MS2	57.1673	80	52.9714	20586	A001.raw	0/0	2.66					3.94798e+06	52.95
	FALSE	High	Sequest HT (A2)	[K].GVDEATIIDILTK.[R]		1	1	P10107	P10107	0	2	0.7082	0	1	1	694.388	1387.77	0.69	0.00048	235367	HCD (High Energy Collision Dissociation)	MS2	0	80	61.3165	24713	A001.raw	0/0	2.57					752543	61.3
	FALSE	High	Sequest HT (A2)	[R].cQDLSVNQDLADTDAR.[A]	C1(Carbamidomethyl)	1	1	P10107	P10107	0	2	0.7336	0	1	1	910.905	1820.8	-2.69	-0.00245	305169	HCD (High Energy Collision Dissociation)	MS2	27.3096	80	35.1995	11875	A001.raw	0/0	2.44
	FALSE	High	Sequest HT (A2)	[K].GTDVNVFTTILTSR.[S]		1	1	P10107	P10107	0	2	0.7521	0	1	1	762.405	1523.8	-1.97	-0.0015	344234	HCD (High Energy Collision Dissociation)	MS2	22.8229	80	57.6997	22939	A001.raw	0/0	2.34					3.7522e+06	57.64
	FALSE	High	Mascot (A6)	[K].GLGTDEDTLIEILTTR.[S]		1	1	P10107	P10107	0	2	1	0	1	1	873.959	1746.91	-0.67	-0.00059	1.15342e+06	HCD (High Energy Collision Dissociation)	MS2	9.02917	80	66.6375	27279	A001.raw	11/120		104	35	20	6.01536e-10	8.75968e+06	66.55
	FALSE	High	Mascot (A6)	[K].GLGTDEDTLIEILTTR.[S]		1	1	P10107	P10107	0	2	0.9684	0	1	1	873.962	1746.92	2.68	0.00234	71017.2	HCD (High Energy Collision Dissociation)	MS2	20.0213	80	66.2739	27106	A001.raw	10/120		95	35	19	3.96402e-09
	FALSE	High	Mascot (A6)	[K].ALTGHLEEVVLAMLK.[T]		1	1	P10107	P10107	0	2	0.9518	0	1	1	812.461	1623.91	0.69	0.00056	208713	HCD (High Energy Collision Dissociation)	MS2	34.4753	80	67.2875	27590	A001.raw	12/112		83	31	16	2.37297e-08	1.54684e+06	67.27
	FALSE	High	Mascot (A6)	[K].GVDEATIIDILTK.[R]		1	1	P10107	P10107	0	2	0.9877	0	1	1	694.389	1387.77	1.75	0.00121	1.08933e+06	HCD (High Energy Collision Dissociation)	MS2	5.59569	80	62.0266	25056	A001.raw	11/96		81	33	18	6.5081e-08	6.30413e+06	61.94
	FALSE	High	Mascot (A6)	[R].KALTGHLEEVVLAMLK.[T]		1	1	P10107	P10107	1	3	1	0	1	1	584.674	1752.01	-0.65	-0.00038	378905	HCD (High Energy Collision Dissociation)	MS2	26.1399	80	61.7367	24916	A001.raw	9/180		80	29	14	3.06415e-08	3.94765e+06	61.74
	FALSE	High	Mascot (A6)	[K].GVDEATIIDILTKR.[T]		1	1	P10107	P10107	1	2	1	0	1	1	772.441	1543.87	3.68	0.00284	447818	HCD (High Energy Collision Dissociation)	MS2	21.6433	80	58.4294	23299	A001.raw	9/108		80	31	16	5.71684e-08	3.13282e+06	58.43
	FALSE	High	Mascot (A6)	[K].GVDEATIIDILTKR.[T]		1	1	P10107	P10107	1	2	1	0	1	1	772.436	1543.86	-2.88	-0.00222	974579	HCD (High Energy Collision Dissociation)	MS2	28.0031	80	58.788	23474	A001.raw	9/108		80	32	17	7.15053e-08	3.7171e+06	58.78
	FALSE	High	Mascot (A6)	[K].GTDVNVFTTILTSR.[S]		1	1	P10107	P10107	0	2	1	0	1	1	762.405	1523.8	-1.97	-0.0015	344234	HCD (High Energy Collision Dissociation)	MS2	22.8229	80	57.6997	22939	A001.raw	8/140		72	36	21	9.19723e-07	3.7522e+06	57.64
	FALSE	High	Mascot (A6)	[K].GVDEATIIDILTK.[R]		1	1	P10107	P10107	0	2	1	0	1	1	694.389	1387.77	2.27	0.00158	629125	HCD (High Energy Collision Dissociation)	MS2	0	80	61.6628	24880	A001.raw	11/96		72	33	18	5.10337e-07	6.54116e+06	61.59
	FALSE	High	Mascot (A6)	[R].FLENQEQEYVQAVK.[S]		1	1	P10107	P10107	0	2	1	0	1	1	862.926	1724.85	-2.3	-0.00199	804774	HCD (High Energy Collision Dissociation)	MS2	0	80	39.8999	14160	A001.raw	11/144		71	37	22	1.57562e-06	6.24856e+06	39.86
	FALSE	High	Mascot (A6)	[R].KALTGHLEEVVLAMLK.[T]		1	1	P10107	P10107	1	3	0.9857	0	1	1	584.675	1752.01	0.39	0.00023	461596	HCD (High Energy Collision Dissociation)	MS2	11.7284	80	62.0953	25089	A001.raw	9/180		70	29	14	3.3908e-07	3.07724e+06	61.97
	FALSE	High	Mascot (A6)	[K].ALTGHLEEVVLAMLK.[T]		1	1	P10107	P10107	0	3	0.9855	0	1	1	541.977	1623.92	1.47	0.0008	358556	HCD (High Energy Collision Dissociation)	MS2	7.26721	80	68.1321	27993	A001.raw	9/112		69	30	15	6.24386e-07	7.67347e+06	68.02
	FALSE	High	Mascot (A6)	[K].ALTGHLEEVVLAMLK.[T]		1	1	P10107	P10107	0	2	1	0	1	1	812.46	1623.91	-0.96	-0.00078	145375	HCD (High Energy Collision Dissociation)	MS2	36.1481	80	68.0014	27931	A001.raw	10/112		67	31	15	9.28122e-07	657222	67.95
	FALSE	High	Mascot (A6)	[K].GTDVNVFTTILTSR.[S]		1	1	P10107	P10107	0	2	1	0	1	1	762.407	1523.81	-0.13	-0.0001	473715	HCD (High Energy Collision Dissociation)	MS2	4.36289	80	58.0516	23113	A001.raw	10/140		66	35	20	3.36022e-06	6.84574e+06	58.01
	FALSE	High	Mascot (A6)	[K].GVDEATIIDILTK.[R]		1	1	P10107	P10107	0	2	1	0	1	1	694.388	1387.77	0.69	0.00048	235367	HCD (High Energy Collision Dissociation)	MS2	0	80	61.3165	24713	A001.raw	9/96		62	33	18	5.37632e-06	752543	61.3
	FALSE	High	Mascot (A6)	[R].cQDLSVNQDLADTDAR.[A]	C1(Carbamidomethyl)	1	1	P10107	P10107	0	2	1	0	1	1	910.905	1820.8	-2.69	-0.00245	305169	HCD (High Energy Collision Dissociation)	MS2	27.3096	80	35.1995	11875	A001.raw	11/176		62	37	22	1.64519e-05
	FALSE	High	Mascot (A6)	[K].ALTGHLEEVVLAMLK.[T]		1	1	P10107	P10107	0	3	1	0	1	1	541.976	1623.91	0.57	0.00031	236244	HCD (High Energy Collision Dissociation)	MS2	0	80	67.7882	27829	A001.raw	9/112		60	31	15	4.9958e-06
	FALSE	High	Mascot (A6)	[K].GLGTDEDTLIEILTTR.[S]		1	1	P10107	P10107	0	3	1	0	1	1	582.975	1746.91	-0.4	-0.00023	582756	HCD (High Energy Collision Dissociation)	MS2	17.2387	80	66.8275	27370	A001.raw	10/120		58	35	20	2.15544e-05	9.99253e+06	66.68
	FALSE	High	Mascot (A6)	[KR].ALLALAK.[GV]		1	3	P10107	P10107; A2BH40; E9QAQ7	0	2	0.5	0	1	1	350.242	699.477	0.65	0.00023	1.56807e+06	HCD (High Energy Collision Dissociation)	MS2	8.81568	38.226	34.486	11524	A001.raw	6/48		56	23	13	2.16393e-06
	FALSE	High	Mascot (A6)	[K].ALTGHLEEVVLAMLK.[T]		1	1	P10107	P10107	0	3	1	0	1	1	541.977	1623.92	1.59	0.00086	691856	HCD (High Energy Collision Dissociation)	MS2	0	80	67.4413	27663	A001.raw	9/112		56	30	15	1.23439e-05	7.77271e+06	67.42
	FALSE	High	Mascot (A6)	[K].GVDEATIIDILTKR.[T]		1	1	P10107	P10107	1	3	1	0	1	1	515.295	1543.87	1.74	0.00089	1204237	HCD (High Energy Collision Dissociation)	MS2	16.1197	80	58.8125	23486	A001.raw	7/108		55	31	16	1.53817e-05	2.27569e+07	58.75
	FALSE	High	Mascot (A6)	[R].KALTGHLEEVVLAMLK.[T]		1	1	P10107	P10107	1	3	1	0	1	1	584.674	1752.01	-1.28	-0.00075	198660	HCD (High Energy Collision Dissociation)	MS2	14.7992	80	62.4632	25268	A001.raw	9/180		55	29	14	1.09525e-05	1.54367e+06	62.4
	FALSE	High	Mascot (A6)	[KR].ALLALAK.[GV]		1	3	P10107	P10107; A2BH40; E9QAQ7	0	2	0.5094	0	1	1	350.242	699.477	0.83	0.00029	4240904	HCD (High Energy Collision Dissociation)	MS2	2.81937	19.374	34.8378	11698	A001.raw	6/48		53	23	13	4.18064e-06	1.87182e+07	34.8
	FALSE	High	Mascot (A6)	[K].GVDEATIIDILTKR.[T]		1	1	P10107	P10107	1	3	1	0	1	1	515.295	1543.87	0.43	0.00022	579706	HCD (High Energy Collision Dissociation)	MS2	44.9299	80	58.4596	23314	A001.raw	7/108		46	32	17	0.000155063	7.87027e+06	58.45
	FALSE	High	Mascot (A6)	[R].RKGTDVNVFTTILTSR.[S]		1	1	P10107	P10107	2	3	1	0	1	1	603.341	1808.01	3.72	0.00224	772862	HCD (High Energy Collision Dissociation)	MS2	31.3722	80	48.1489	18216	A001.raw	7/180		43	30	15	0.000224937	9.92115e+06	48.13
	FALSE	High	Mascot (A6)	[KR].ALLALAK.[GV]		1	3	P10107	P10107; A2BH40; E9QAQ7	0	2	0.2927	0	1	1	350.242	699.476	-0.22	-8e-05	419323	HCD (High Energy Collision Dissociation)	MS2	27.8894	80	35.1921	11871	A001.raw	5/48		41	23	13	6.51992e-05	1.53671e+06	35.2
	FALSE	High	Mascot (A6)	[K].GTDVNVFTTILTSR.[S]		1	1	P10107	P10107	0	2	0.9512	0	1	1	762.406	1523.8	-1.57	-0.0012	284292	HCD (High Energy Collision Dissociation)	MS2	21.715	80	58.6225	23394	A001.raw	8/140		41	36	21	0.00125076	2.58422e+06	58.66
	FALSE	High	Mascot (A6)	[R].RVFQNYGK.[Y]		1	1	P10107	P10107	1	2	0.9756	0	1	1	506.273	1011.54	1.26	0.00064	197986	HCD (High Energy Collision Dissociation)	MS2	33.1536	80	19.9994	4739	A001.raw	6/84		41	32	16	0.000483426	386584	20.01
	FALSE	High	Mascot (A6)	[K].ALTGHLEEVVLAMLK.[T]		1	1	P10107	P10107	0	3	0.9744	0	1	1	541.975	1623.91	-1.35	-0.00073	103664	HCD (High Energy Collision Dissociation)	MS2	8.06	80	67.0805	27491	A001.raw	7/112		39	31	16	0.000670682
	FALSE	High	Mascot (A6)	[K].GVDEATIIDILTKR.[T]		1	1	P10107	P10107	1	3	1	0	1	1	515.293	1543.87	-2.53	-0.0013	341405	HCD (High Energy Collision Dissociation)	MS2	36.6276	80	59.1722	23663	A001.raw	6/108		39	32	17	0.000916934	1.41253e+07	59.09
	FALSE	High	Mascot (A6)	[K].GLGTDEDTLIEILTTR.[S]		1	1	P10107	P10107	0	3	1	0	1	1	582.976	1746.91	1.07	0.00062	194091	HCD (High Energy Collision Dissociation)	MS2	49.4791	80	66.4585	27194	A001.raw	8/120		36	35	20	0.00319845	2.15868e+06	66.5
FALSE	Master Protein	P18760	Cofilin-1 OS=Mus musculus GN=Cfl1 PE=1 SV=3	35.5422	4	11	0	1	166	18.5	8.09	High		High	0	19.04	4	High	0	225	3
	Checked	Confidence	Identifying Node	Annotated Sequence	Modifications	# Protein Groups	# Proteins	Master Protein Accessions	Protein Accessions	# Missed Cleavages	Charge	DeltaScore	DeltaCn	Rank	Search Engine Rank	m/z [Da]	MH+ [Da]	DeltaM [ppm]	Deltam/z [Da]	Intensity	Activation Type	MS Order	Isolation Interference [%]	Ion Inject Time [ms]	RT [min]	First Scan	Spectrum File	Ions Matched	XCorr	Ions Score	Identity Strict	Identity Relaxed	Expectation Value	Area	Apex RT [min]
	FALSE	High	Sequest HT (A2)	[K].NIILEEGKEILVGDVGQTVDDPYTTFVK.[M]		1	1	P18760	P18760	1	3	0.8478	0	1	1	1031.54	3092.6	-1.68	-0.00173	593924	HCD (High Energy Collision Dissociation)	MS2	0	80	62.2783	25178	A001.raw	0/0	5.52					3748622	62.26
	FALSE	High	Sequest HT (A2)	[K].KEDLVFIFWAPENAPLK.[S]		1	1	P18760	P18760	1	3	0.7584	0	1	1	673.031	2017.08	-0.7	-0.00047	218928	HCD (High Energy Collision Dissociation)	MS2	8.41156	80	64.2614	26136	A001.raw	0/0	3.27					4.80438e+06	64.23
	FALSE	High	Sequest HT (A2)	[K].ESKKEDLVFIFWAPENAPLK.[S]		1	1	P18760	P18760	2	3	0.5871	0	1	1	787.755	2361.25	0.27	0.00021	245018	HCD (High Energy Collision Dissociation)	MS2	13.3307	80	60.0773	24107	A001.raw	0/0	2.64					6.11015e+06	60.05
	FALSE	High	Sequest HT (A2)	[R].YALYDATYETK.[E]		1	2	P18760	P45591; P18760	0	2	0.7186	0	1	1	669.316	1337.63	-0.51	-0.00034	798153	HCD (High Energy Collision Dissociation)	MS2	11.7297	80	36.3705	12432	A001.raw	0/0	2.63
	FALSE	High	Sequest HT (A2)	[R].YALYDATYETK.[E]		1	2	P18760	P45591; P18760	0	2	0.6834	0	1	1	669.316	1337.63	-0.33	-0.00022	442507	HCD (High Energy Collision Dissociation)	MS2	0	80	36.7318	12605	A001.raw	0/0	2.59
	FALSE	High	Sequest HT (A2)	[R].YALYDATYETK.[E]		1	2	P18760	P45591; P18760	0	2	0.6134	0	1	1	669.315	1337.62	-2.15	-0.00144	684833	HCD (High Energy Collision Dissociation)	MS2	13.8303	80	36.0254	12263	A001.raw	0/0	2.38
	FALSE	High	Mascot (A6)	[K].NIILEEGKEILVGDVGQTVDDPYTTFVK.[M]		1	2	P18760	P18760; F8WGL3	1	3	1	0	1	1	1031.54	3092.6	-1.68	-0.00173	593924	HCD (High Energy Collision Dissociation)	MS2	0	80	62.2783	25178	A001.raw	24/324		106	35	20	3.93302e-10	3748622	62.26
	FALSE	High	Mascot (A6)	[R].YALYDATYETK.[E]		1	3	P18760	P45591; P18760; F8WGL3	0	2	1	0	1	1	669.316	1337.63	-0.51	-0.00034	798153	HCD (High Energy Collision Dissociation)	MS2	11.7297	80	36.3705	12432	A001.raw	8/80		54	35	20	4.84813e-05
	FALSE	High	Mascot (A6)	[R].YALYDATYETK.[E]		1	3	P18760	P45591; P18760; F8WGL3	0	2	1	0	1	1	669.316	1337.63	-0.33	-0.00022	442507	HCD (High Energy Collision Dissociation)	MS2	0	80	36.7318	12605	A001.raw	9/80		42	35	20	0.000814336
	FALSE	High	Mascot (A6)	[K].KEDLVFIFWAPENAPLK.[S]		1	2	P18760	P18760; F8WGL3	1	3	1	0	1	1	673.031	2017.08	-0.7	-0.00047	218928	HCD (High Energy Collision Dissociation)	MS2	8.41156	80	64.2614	26136	A001.raw	15/192		41	33	18	0.000762954	4.80438e+06	64.23
	FALSE	High	Mascot (A6)	[R].YALYDATYETK.[E]		1	3	P18760	P45591; P18760; F8WGL3	0	2	1	0	1	1	669.315	1337.62	-2.15	-0.00144	684833	HCD (High Energy Collision Dissociation)	MS2	13.8303	80	36.0254	12263	A001.raw	5/80		36	35	20	0.00296875
FALSE	Master Protein	P01027	Complement C3 OS=Mus musculus GN=C3 PE=1 SV=3	34.7565	42	140	36	1	1663	186.4	6.73	High		High	0	236.63	37	High	0	3202	35
	Checked	Confidence	Identifying Node	Annotated Sequence	Modifications	# Protein Groups	# Proteins	Master Protein Accessions	Protein Accessions	# Missed Cleavages	Charge	DeltaScore	DeltaCn	Rank	Search Engine Rank	m/z [Da]	MH+ [Da]	DeltaM [ppm]	Deltam/z [Da]	Intensity	Activation Type	MS Order	Isolation Interference [%]	Ion Inject Time [ms]	RT [min]	First Scan	Spectrum File	Ions Matched	XCorr	Ions Score	Identity Strict	Identity Relaxed	Expectation Value	Area	Apex RT [min]
	FALSE	High	Sequest HT (A2)	[R].IILQGSPVVQMAEDAVDGER.[L]		1	1	P01027	P01027	0	2	0.7929	0	1	1	1064.04	2127.07	-0.25	-0.00027	1.44087e+06	HCD (High Energy Collision Dissociation)	MS2	20.5222	80	61.9809	25034	A001.raw	0/0	5.6					7.62139e+06	61.96
	FALSE	High	Sequest HT (A2)	[R].IILQGSPVVQMAEDAVDGER.[L]		1	1	P01027	P01027	0	3	0.7595	0	1	1	709.696	2127.07	-1.46	-0.00104	578055	HCD (High Energy Collision Dissociation)	MS2	2.74997	80	62.14	25111	A001.raw	0/0	5.24
	FALSE	High	Sequest HT (A2)	[R].QVREPGQDLVVLSLPITPEFIPSFR.[L]		1	1	P01027	P01027	1	3	0.8615	0	1	1	946.521	2837.55	-2.47	-0.00234	409286	HCD (High Energy Collision Dissociation)	MS2	11.5631	80	70.1526	28961	A001.raw	0/0	5.2					2.66213e+07	70.02
	FALSE	High	Sequest HT (A2)	[R].IILQGSPVVQMAEDAVDGER.[L]		1	1	P01027	P01027	0	2	0.7813	0	1	1	1064.04	2127.07	-0.48	-0.00051	784843	HCD (High Energy Collision Dissociation)	MS2	12.9836	80	62.344	25210	A001.raw	0/0	5.03
	FALSE	High	Sequest HT (A2)	[R].IILQGSPVVQMAEDAVDGER.[L]		1	1	P01027	P01027	0	2	0.738	0	1	1	1064.04	2127.07	-0.82	-0.00088	821105	HCD (High Energy Collision Dissociation)	MS2	32.0106	80	61.6173	24858	A001.raw	0/0	5					9.06385e+06	61.62
	FALSE	High	Sequest HT (A2)	[R].DILSSNNQHGILPLSWNIPELVNMGQWK.[I]		1	1	P01027	P01027	0	3	0.7042	0	1	1	1068.55	3203.63	-0.74	-0.00079	283497	HCD (High Energy Collision Dissociation)	MS2	0	80	74.246	30908	A001.raw	0/0	4.97					7.6677e+06	74.12
	FALSE	High	Sequest HT (A2)	[R].IILQGSPVVQMAEDAVDGER.[L]		1	1	P01027	P01027	0	3	0.7362	0	1	1	709.697	2127.08	0.26	0.00018	1.44356e+06	HCD (High Energy Collision Dissociation)	MS2	7.11922	80	61.7853	24940	A001.raw	0/0	4.89					7.44416e+06	61.72
	FALSE	High	Sequest HT (A2)	[K].VDVPAADLSDQVPDTDSETR.[I]		1	1	P01027	P01027	0	2	0.8529	0	1	1	1065.49	2129.98	-2	-0.00213	794907	HCD (High Energy Collision Dissociation)	MS2	0	80	39.9172	14168	A001.raw	0/0	4.76					4.18559e+06	39.93
	FALSE	High	Sequest HT (A2)	[R].NRWEEPDQQLYNVEATSYALLALLLLK.[D]		1	1	P01027	P01027	1	3	0.8929	0	1	1	1064.23	3190.67	-3.89	-0.00414	48479.5	HCD (High Energy Collision Dissociation)	MS2	48.0189	80	87.9881	36775	A001.raw	0/0	4.76					1.20212e+06	88.01
	FALSE	High	Sequest HT (A2)	[R].QVREPGQDLVVLSLPITPEFIPSFR.[L]		1	1	P01027	P01027	1	3	0.8013	0	1	1	946.524	2837.56	-0.02	-2e-05	217121	HCD (High Energy Collision Dissociation)	MS2	29.5496	80	69.7942	28790	A001.raw	0/0	4.73					2.16909e+07	69.88
	FALSE	High	Sequest HT (A2)	[K].LGQGGVQKVDVPAADLSDQVPDTDSETR.[I]		1	1	P01027	P01027	1	3	0.8395	0	1	1	966.472	2897.4	-4.14	-0.004	409521	HCD (High Energy Collision Dissociation)	MS2	0	80	41.1165	14756	A001.raw	0/0	4.61					1.96365e+06	41.08
	FALSE	High	Sequest HT (A2)	[R].IILQGSPVVQMAEDAVDGER.[L]		1	1	P01027	P01027	0	3	0.7494	0	1	1	709.695	2127.07	-1.72	-0.00122	437468	HCD (High Energy Collision Dissociation)	MS2	0	80	61.3981	24752	A001.raw	0/0	4.47					6.95243e+06	61.42
	FALSE	High	Sequest HT (A2)	[R].SELEEDIIPEEDIISR.[S]		1	1	P01027	P01027	0	2	0.8054	0	1	1	943.965	1886.92	0.04	4e-05	1.96763e+06	HCD (High Energy Collision Dissociation)	MS2	3.42858	80	51.8519	20037	A001.raw	0/0	4.42					1.37327e+07	51.97
	FALSE	High	Sequest HT (A2)	[K].FFKPAMPFDLMVFVTNPDGSPASK.[V]		1	1	P01027	P01027	0	3	0.74	0	1	1	881.773	2643.3	2.09	0.00184	323383	HCD (High Energy Collision Dissociation)	MS2	84.3549	80	69.6057	28699	A001.raw	0/0	4.27
	FALSE	High	Sequest HT (A2)	[R].SELEEDIIPEEDIISR.[S]		1	1	P01027	P01027	0	2	0.7929	0	1	1	943.965	1886.92	-0.28	-0.00027	1.75043e+06	HCD (High Energy Collision Dissociation)	MS2	0	80	52.2026	20210	A001.raw	0/0	4.25					5.48697e+06	52.2
	FALSE	High	Sequest HT (A2)	[K].FFKPAMPFDLMVFVTNPDGSPASK.[V]		1	1	P01027	P01027	0	3	0.7694	0	1	1	881.771	2643.3	0.02	1e-05	234801	HCD (High Energy Collision Dissociation)	MS2	15.1415	80	70.2908	29027	A001.raw	0/0	4.25
	FALSE	High	Sequest HT (A2)	[R].SELEEDIIPEEDIISR.[S]		1	1	P01027	P01027	0	2	0.747	0	1	1	943.963	1886.92	-2.03	-0.00191	623787	HCD (High Energy Collision Dissociation)	MS2	39.0718	80	51.3919	19809	A001.raw	0/0	4.19
	FALSE	High	Sequest HT (A2)	[R].YYGGGYGSTQATFMVFQALAQYQTDVPDHKDLNMDVSFHLPSR.[S]		1	1	P01027	P01027	1	5	0.5444	0	1	1	971.86	4855.27	3.65	0.00354	87938	HCD (High Energy Collision Dissociation)	MS2	11.1303	80	68.8555	28340	A001.raw	0/0	4.17					6.36896e+06	68.86
	FALSE	High	Sequest HT (A2)	[K].VDVPAADLSDQVPDTDSETR.[I]		1	1	P01027	P01027	0	2	0.8747	0	1	1	1065.49	2129.98	-2.11	-0.00225	305756	HCD (High Energy Collision Dissociation)	MS2	33.4738	80	39.5732	13999	A001.raw	0/0	4.15					1.32098e+06	39.56
	FALSE	High	Sequest HT (A2)	[K].FFKPAMPFDLMVFVTNPDGSPASK.[V]		1	1	P01027	P01027	0	3	0.7315	0	1	1	881.771	2643.3	-0.19	-0.00017	674758	HCD (High Energy Collision Dissociation)	MS2	5.16625	80	69.9456	28862	A001.raw	0/0	4.06					2.4796e+07	69.82
	FALSE	High	Sequest HT (A2)	[R].DILSSNNQHGILPLSWNIPELVNMGQWK.[I]		1	1	P01027	P01027	0	3	0.7175	0	1	1	1068.55	3203.63	0.52	0.00056	162483	HCD (High Energy Collision Dissociation)	MS2	6.84016	80	74.5938	31073	A001.raw	0/0	4					1.74948e+06	74.51
	FALSE	High	Sequest HT (A2)	[R].SGIPIVTSPYQIHFTK.[T]		1	1	P01027	P01027	0	2	0.7243	0	1	1	894.489	1787.97	0.95	0.00085	487989	HCD (High Energy Collision Dissociation)	MS2	34.5333	80	50.1312	19190	A001.raw	0/0	3.99					2.95077e+06	50.15
	FALSE	High	Sequest HT (A2)	[K].LGQGGVQKVDVPAADLSDQVPDTDSETR.[I]		1	1	P01027	P01027	1	3	0.7949	0	1	1	966.472	2897.4	-4.08	-0.00394	507025	HCD (High Energy Collision Dissociation)	MS2	0	80	40.7635	14583	A001.raw	0/0	3.95					2.0865e+06	40.75
	FALSE	High	Sequest HT (A2)	[R].SELEEDIIPEEDIISR.[S]		1	1	P01027	P01027	0	2	0.7216	0	1	1	943.966	1886.92	0.49	0.00047	195320	HCD (High Energy Collision Dissociation)	MS2	0	80	52.5776	20392	A001.raw	0/0	3.88					2.03105e+06	52.6
	FALSE	High	Sequest HT (A2)	[K].YLMWGLSSDLWGEKPNTSYIIGK.[D]		1	1	P01027	P01027	0	3	0.7042	0	1	1	886.778	2658.32	-3.46	-0.00307	599493	HCD (High Energy Collision Dissociation)	MS2	0	80	65.0258	26505	A001.raw	0/0	3.82					9520118	64.92
	FALSE	High	Sequest HT (A2)	[R].DIcEGQVNSLPGSINK.[A]	C3(Carbamidomethyl)	1	1	P01027	P01027	0	2	0.7953	0	1	1	865.921	1730.83	-1.88	-0.00163	420469	HCD (High Energy Collision Dissociation)	MS2	12.4497	80	37.5758	13019	A001.raw	0/0	3.81					3.24036e+06	37.48
	FALSE	High	Sequest HT (A2)	[R].DIcEGQVNSLPGSINK.[A]	C3(Carbamidomethyl)	1	1	P01027	P01027	0	2	0.8408	0	1	1	865.922	1730.84	-1.17	-0.00102	634052	HCD (High Energy Collision Dissociation)	MS2	0	80	37.2176	12841	A001.raw	0/0	3.77					3.2608e+06	37.21
	FALSE	High	Sequest HT (A2)	[R].MELKPGDNLNVNFHLR.[T]		1	1	P01027	P01027	0	3	0.7135	0	1	1	632.996	1896.97	-1.38	-0.00087	1.18145e+06	HCD (High Energy Collision Dissociation)	MS2	18.8917	80	45.0987	16698	A001.raw	0/0	3.7					2.96036e+06	45.2
	FALSE	High	Sequest HT (A2)	[R].VVIEDGVGDAVLTR.[K]		1	1	P01027	P01027	0	2	0.7826	0	1	1	721.896	1442.79	0.19	0.00013	1778463	HCD (High Energy Collision Dissociation)	MS2	14.1532	80	42.2953	15330	A001.raw	0/0	3.68					1.10758e+07	42.2
	FALSE	High	Sequest HT (A2)	[R].LVAYYTLIGASGQR.[E]		1	1	P01027	P01027	0	2	0.8338	0	1	1	756.415	1511.82	1	0.00076	410872	HCD (High Energy Collision Dissociation)	MS2	38.0067	80	48.4624	18370	A001.raw	0/0	3.55					8.19278e+06	48.53
	FALSE	High	Sequest HT (A2)	[R].DNHLAPGQQTTLR.[I]		1	1	P01027	P01027	0	3	0.7225	0	1	1	484.252	1450.74	0.4	0.00019	1299792	HCD (High Energy Collision Dissociation)	MS2	8.74524	69.754	24.4149	6748	A001.raw	0/0	3.46					6.13992e+06	24.45
	FALSE	High	Sequest HT (A2)	[R].VGLVAVDKGVFVLNKK.[N]		1	1	P01027	P01027	2	3	0.8964	0	1	1	562.684	1686.04	3.6	0.00202	777070	HCD (High Energy Collision Dissociation)	MS2	46.6274	80	44.4143	16357	A001.raw	0/0	3.38
	FALSE	High	Sequest HT (A2)	[K].TVAIHTLDPEKLGQGGVQK.[V]		1	1	P01027	P01027	1	3	0.6842	0	1	1	664.369	1991.09	0.8	0.00053	333734	HCD (High Energy Collision Dissociation)	MS2	50.1208	80	36.4657	12477	A001.raw	0/0	3.23
	FALSE	High	Sequest HT (A2)	[R].EPGQDLVVLSLPITPEFIPSFR.[L]		1	1	P01027	P01027	0	3	0.6842	0	1	1	818.781	2454.33	0.68	0.00056	153292	HCD (High Energy Collision Dissociation)	MS2	2.07784	80	74.2924	30930	A001.raw	0/0	3.23					1.61616e+06	74.3
	FALSE	High	Sequest HT (A2)	[K].TVVILIETPDGIPVKR.[D]		1	1	P01027	P01027	1	3	0.8526	0	1	1	584.02	1750.04	-1.55	-0.0009	419902	HCD (High Energy Collision Dissociation)	MS2	32.0386	80	49.4001	18830	A001.raw	0/0	3.12
	FALSE	High	Sequest HT (A2)	[K].TVAIHTLDPEK.[L]		1	1	P01027	P01027	0	2	0.7161	0	1	1	612.336	1223.66	0.58	0.00036	1.70379e+06	HCD (High Energy Collision Dissociation)	MS2	4.92323	78.094	28.9726	8902	A001.raw	0/0	3.1					6.43586e+06	28.93
	FALSE	High	Sequest HT (A2)	[K].TELTNIELLDDFDEYTMTIQQVIK.[S]		1	1	P01027	P01027	0	2	0.8738	0	1	1	1436.71	2872.42	0.61	0.00088	66390.6	HCD (High Energy Collision Dissociation)	MS2	31.8402	80	78.7801	32972	A001.raw	0/0	3.09					418549	78.76
	FALSE	High	Sequest HT (A2)	[K].FFKPAMPFDLMVFVTNPDGSPASK.[V]		1	1	P01027	P01027	0	2	0.7883	0	1	1	1322.15	2643.29	-2.01	-0.00266	65596.3	HCD (High Energy Collision Dissociation)	MS2	0	80	69.8607	28822	A001.raw	0/0	3.07
	FALSE	High	Sequest HT (A2)	[R].VVIEDGVGDAVLTRK.[V]		1	1	P01027	P01027	1	2	0.7441	0	1	1	785.943	1570.88	-0.76	-0.00059	431547	HCD (High Energy Collision Dissociation)	MS2	16.2491	80	38.1416	13289	A001.raw	0/0	2.97					2.48508e+06	38.14
	FALSE	High	Sequest HT (A2)	[K].SSVAVPYVIVPLK.[I]		1	1	P01027	P01027	0	2	0.7466	0	1	1	686.416	1371.82	-0.16	-0.00011	9322323	HCD (High Energy Collision Dissociation)	MS2	8.33912	11.586	52.7438	20474	A001.raw	0/0	2.96					5.83366e+07	52.72
	FALSE	High	Sequest HT (A2)	[R].DNHLAPGQQTTLR.[I]		1	1	P01027	P01027	0	3	0.6804	0	1	1	484.25	1450.74	-2.06	-0.001	492134	HCD (High Energy Collision Dissociation)	MS2	14.278	80	24.7775	6924	A001.raw	0/0	2.91					2.18485e+06	24.72
	FALSE	High	Sequest HT (A2)	[K].AcEPGVDYVYK.[T]	C2(Carbamidomethyl)	1	1	P01027	P01027	0	2	0.6901	0	1	1	650.798	1300.59	0.1	6e-05	1.16326e+06	HCD (High Energy Collision Dissociation)	MS2	14.4818	80	33.2487	10921	A001.raw	0/0	2.84					2.54814e+06	33.22
	FALSE	High	Sequest HT (A2)	[K].SSVAVPYVIVPLK.[I]		1	1	P01027	P01027	0	2	0.6702	0	1	1	686.416	1371.82	-0.43	-0.0003	2.08926e+06	HCD (High Energy Collision Dissociation)	MS2	16.1459	41.502	52.3923	20301	A001.raw	0/0	2.82					2.77284e+07	52.55
	FALSE	High	Sequest HT (A2)	[K].VHQYFNVGLIQPGSVK.[V]		1	1	P01027	P01027	0	3	0.6548	0	1	1	595.993	1785.97	0.28	0.00016	1.00696e+06	HCD (High Energy Collision Dissociation)	MS2	23.937	80	46.2635	17284	A001.raw	0/0	2.81					1.54253e+07	46.26
	FALSE	High	Sequest HT (A2)	[R].VELLHNPAFcSMATAK.[N]	C10(Carbamidomethyl)	1	1	P01027	P01027	0	3	0.6121	0	1	1	596.964	1788.88	-0.15	-9e-05	770754	HCD (High Energy Collision Dissociation)	MS2	46.1166	61.551	43.5283	15931	A001.raw	0/0	2.81					7.33308e+06	43.52
	FALSE	High	Sequest HT (A2)	[R].SGIPIVTSPYQIHFTK.[T]		1	1	P01027	P01027	0	3	0.6509	0	1	1	596.661	1787.97	0.4	0.00024	1.7421e+06	HCD (High Energy Collision Dissociation)	MS2	40.4188	32.643	49.7151	18986	A001.raw	0/0	2.75
	FALSE	High	Sequest HT (A2)	[R].IFTVDNNLLPVGK.[T]		1	1	P01027	P01027	0	2	0.6898	0	1	1	715.407	1429.81	1.73	0.00124	1.37282e+06	HCD (High Energy Collision Dissociation)	MS2	20.3703	80	50.6755	19454	A001.raw	0/0	2.74					1.10038e+07	50.82
	FALSE	High	Sequest HT (A2)	[K].VYSYYNLEEScTR.[F]	C11(Carbamidomethyl)	1	1	P01027	P01027	0	2	0.685	0	1	1	842.367	1683.73	-3.08	-0.00259	689170	HCD (High Energy Collision Dissociation)	MS2	0	80	38.1057	13271	A001.raw	0/0	2.73					2.34877e+06	38.1
	FALSE	High	Sequest HT (A2)	[K].VYSYYNLEEScTR.[F]	C11(Carbamidomethyl)	1	1	P01027	P01027	0	2	0.7537	0	1	1	842.368	1683.73	-1.7	-0.00143	366522	HCD (High Energy Collision Dissociation)	MS2	7.85481	80	38.8358	13632	A001.raw	0/0	2.68					4.39623e+06	38.74
	FALSE	High	Sequest HT (A2)	[R].IILQGSPVVQMAEDAVDGER.[L]		1	1	P01027	P01027	0	2	0.3209	0	1	1	1064.04	2127.07	-0.02	-2e-05	1.44815e+06	HCD (High Energy Collision Dissociation)	MS2	52.2767	80	62.0798	25082	A001.raw	0/0	2.68					7.62139e+06	61.96
	FALSE	High	Sequest HT (A2)	[K].AcEPGVDYVYK.[T]	C2(Carbamidomethyl)	1	1	P01027	P01027	0	2	0.7023	0	1	1	650.798	1300.59	0.28	0.00018	2.65469e+06	HCD (High Energy Collision Dissociation)	MS2	10.672	54.617	32.9094	10757	A001.raw	0/0	2.62					6.52667e+06	32.9
	FALSE	High	Sequest HT (A2)	[K].VLVVTQGSNAK.[A]		1	1	P01027	P01027	0	2	0.7038	0	1	1	558.324	1115.64	-0.22	-0.00012	1.03663e+06	HCD (High Energy Collision Dissociation)	MS2	2.96057	80	22.6603	5922	A001.raw	0/0	2.6					1.75464e+06	22.69
	FALSE	High	Sequest HT (A2)	[K].SSVAVPYVIVPLK.[I]		1	1	P01027	P01027	0	2	0.6795	0	1	1	686.416	1371.82	-0.08	-5e-05	3915816	HCD (High Energy Collision Dissociation)	MS2	9.26413	37.719	53.0863	20641	A001.raw	0/0	2.59					9.08929e+06	53.1
	FALSE	High	Sequest HT (A2)	[K].VLMEGVRPSNADALVGK.[S]		1	1	P01027	P01027	0	2	0.6749	0	1	1	878.473	1755.94	-2.01	-0.00177	251681	HCD (High Energy Collision Dissociation)	MS2	0	80	38.8676	13648	A001.raw	0/0	2.43					1.86358e+06	38.85
	FALSE	High	Sequest HT (A2)	[K].TVAIHTLDPEK.[L]		1	1	P01027	P01027	0	2	0.5785	0	1	1	612.334	1223.66	-2.51	-0.00153	328352	HCD (High Energy Collision Dissociation)	MS2	53.8235	80	28.6328	8736	A001.raw	0/0	2.42
	FALSE	High	Sequest HT (A2)	[K].GIcVADPYEIR.[V]	C3(Carbamidomethyl)	1	1	P01027	P01027	0	2	0.657	0	1	1	646.819	1292.63	-0.04	-3e-05	1.18038e+06	HCD (High Energy Collision Dissociation)	MS2	24.4558	80	41.13	14762	A001.raw	0/0	2.42					6.74482e+06	41.1
	FALSE	High	Sequest HT (A2)	[K].TVLTGASGHLR.[S]		1	1	P01027	P01027	0	2	0.6612	0	1	1	556.315	1111.62	0.26	0.00014	1.67439e+06	HCD (High Energy Collision Dissociation)	MS2	20.6533	49.042	25.0498	7050	A001.raw	0/0	2.42					1.0258e+06	25.07
	FALSE	High	Sequest HT (A2)	[R].DIcEGQVNSLPGSINK.[A]	C3(Carbamidomethyl)	1	1	P01027	P01027	0	2	0.766	0	1	1	865.923	1730.84	0.87	0.00075	254595	HCD (High Energy Collision Dissociation)	MS2	0	80	36.8704	12674	A001.raw	0/0	2.35					1.80746e+06	36.86
	FALSE	High	Sequest HT (A2)	[K].TIYTPGSTVLYR.[I]		1	1	P01027	P01027	0	2	0.688	0	1	1	685.869	1370.73	-0.5	-0.00034	1.022e+06	HCD (High Energy Collision Dissociation)	MS2	26.6207	80	40.8874	14644	A001.raw	0/0	2.34					3.7829e+06	40.85
	FALSE	High	Sequest HT (A2)	[K].ISLAHSLTR.[V]		1	1	P01027	P01027	0	2	0.6	0	1	1	499.293	997.579	-0.06	-3e-05	1.27854e+06	HCD (High Energy Collision Dissociation)	MS2	36.515	52.324	28.7819	8810	A001.raw	0/0	2.3					2.13723e+06	28.79
	FALSE	High	Sequest HT (A2)	[R].VGLVAVDK.[G]		1	1	P01027	P01027	0	2	0.6348	0	1	1	400.748	800.488	0.57	0.00023	2842619	HCD (High Energy Collision Dissociation)	MS2	3.84063	29.848	27.6177	8252	A001.raw	0/0	2.3					5.82727e+06	27.63
	FALSE	High	Sequest HT (A2)	[R].VGLVAVDK.[G]		1	1	P01027	P01027	0	2	0.5919	0	1	1	400.747	800.488	-0.12	-5e-05	1699694	HCD (High Energy Collision Dissociation)	MS2	9.44527	43.808	27.9561	8415	A001.raw	0/0	2.23
	FALSE	High	Sequest HT (A2)	[K].VLVVTQGSNAK.[A]		1	1	P01027	P01027	0	2	0.6637	0	1	1	558.324	1115.64	-0.44	-0.00025	1.68353e+06	HCD (High Energy Collision Dissociation)	MS2	12.2025	38.689	23.0175	6088	A001.raw	0/0	2.23					4.10087e+06	23
	FALSE	High	Sequest HT (A2)	[K].AcEPGVDYVYK.[T]	C2(Carbamidomethyl)	1	1	P01027	P01027	0	2	0.7104	0	1	1	650.798	1300.59	0.28	0.00018	844717	HCD (High Energy Collision Dissociation)	MS2	40.2518	80	32.5594	10588	A001.raw	0/0	2.21					1.91463e+06	32.57
	FALSE	High	Sequest HT (A2)	[K].TVLTGASGHLR.[S]		1	1	P01027	P01027	0	2	0.6758	0	1	1	556.315	1111.62	0.59	0.00033	690230	HCD (High Energy Collision Dissociation)	MS2	40.2883	80	25.3917	7209	A001.raw	0/0	2.19					941196	25.41
	FALSE	High	Sequest HT (A2)	[K].DScIGTLVVK.[G]	C3(Carbamidomethyl)	1	1	P01027	P01027	0	2	0.4009	0	1	1	546.292	1091.58	-0.28	-0.00015	689356	HCD (High Energy Collision Dissociation)	MS2	15.4509	80	37.0774	12772	A001.raw	0/0	2.17					2.2045e+06	37.09
	FALSE	High	Sequest HT (A2)	[K].DScIGTLVVK.[G]	C3(Carbamidomethyl)	1	1	P01027	P01027	0	2	0.3886	0	1	1	546.292	1091.58	0.73	0.0004	898668	HCD (High Energy Collision Dissociation)	MS2	0	80	36.7299	12604	A001.raw	0/0	2.11
	FALSE	High	Sequest HT (A2)	[K].VLVVTQGSNAK.[A]		1	1	P01027	P01027	0	2	0.6135	0	1	1	558.325	1115.64	1.42	0.00079	341433	HCD (High Energy Collision Dissociation)	MS2	55.0493	80	23.3594	6247	A001.raw	0/0	2.07					940219	23.29
	FALSE	High	Sequest HT (A2)	[K].TVLTGASGHLR.[S]		1	1	P01027	P01027	0	2	0.6262	0	1	1	556.315	1111.62	0.48	0.00026	451548	HCD (High Energy Collision Dissociation)	MS2	44.5642	80	24.6987	6886	A001.raw	0/0	2.06					895869	24.75
	FALSE	High	Sequest HT (A2)	[K].TIYTPGSTVLYR.[I]		1	1	P01027	P01027	0	2	0.6439	0	1	1	685.869	1370.73	-0.14	-0.0001	889019	HCD (High Energy Collision Dissociation)	MS2	18.9786	80	40.5233	14465	A001.raw	0/0	2.05					4.29056e+06	40.57
	FALSE	High	Mascot (A6)	[R].IILQGSPVVQMAEDAVDGER.[L]		1	1	P01027	P01027	0	2	1	0	1	1	1064.04	2127.07	-0.25	-0.00027	1.44087e+06	HCD (High Energy Collision Dissociation)	MS2	20.5222	80	61.9809	25034	A001.raw	14/216		142	37	22	1.33546e-13	7.62139e+06	61.96
	FALSE	High	Mascot (A6)	[R].IILQGSPVVQMAEDAVDGER.[L]		1	1	P01027	P01027	0	2	1	0	1	1	1064.04	2127.07	-0.48	-0.00051	784843	HCD (High Energy Collision Dissociation)	MS2	12.9836	80	62.344	25210	A001.raw	14/216		142	37	22	1.41719e-13
	FALSE	High	Mascot (A6)	[R].IILQGSPVVQMAEDAVDGER.[L]		1	1	P01027	P01027	0	2	1	0	1	1	1064.04	2127.07	-0.82	-0.00088	821105	HCD (High Energy Collision Dissociation)	MS2	32.0106	80	61.6173	24858	A001.raw	13/216		122	37	22	1.21858e-11	9.06385e+06	61.62
	FALSE	High	Mascot (A6)	[K].VDVPAADLSDQVPDTDSETR.[I]		1	1	P01027	P01027	0	2	1	0	1	1	1065.49	2129.98	-2.11	-0.00225	305756	HCD (High Energy Collision Dissociation)	MS2	33.4738	80	39.5732	13999	A001.raw	13/188		117	38	22	4.39476e-11	1.32098e+06	39.56
	FALSE	High	Mascot (A6)	[K].VDVPAADLSDQVPDTDSETR.[I]		1	1	P01027	P01027	0	2	1	0	1	1	1065.49	2129.98	-2	-0.00213	794907	HCD (High Energy Collision Dissociation)	MS2	0	80	39.9172	14168	A001.raw	12/188		99	38	22	2.83838e-09	4.18559e+06	39.93
	FALSE	High	Mascot (A6)	[R].VVIEDGVGDAVLTR.[K]		1	1	P01027	P01027	0	2	1	0	1	1	721.896	1442.79	0.19	0.00013	1778463	HCD (High Energy Collision Dissociation)	MS2	14.1532	80	42.2953	15330	A001.raw	13/104		97	34	19	1.87906e-09	1.10758e+07	42.2
	FALSE	High	Mascot (A6)	[R].NRWEEPDQQLYNVEATSYALLALLLLK.[D]		1	1	P01027	P01027	1	3	1	0	1	1	1064.23	3190.67	-3.89	-0.00414	48479.5	HCD (High Energy Collision Dissociation)	MS2	48.0189	80	87.9881	36775	A001.raw	22/312		89	34	19	1.25436e-08	1.20212e+06	88.01
	FALSE	High	Mascot (A6)	[R].IILQGSPVVQMAEDAVDGER.[L]		1	1	P01027	P01027	0	3	1	0	1	1	709.696	2127.07	-1.46	-0.00104	578055	HCD (High Energy Collision Dissociation)	MS2	2.74997	80	62.14	25111	A001.raw	10/216		84	37	22	8.63677e-08
	FALSE	High	Mascot (A6)	[R].SELEEDIIPEEDIISR.[S]		1	1	P01027	P01027	0	2	1	0	1	1	943.965	1886.92	-0.28	-0.00027	1.75043e+06	HCD (High Energy Collision Dissociation)	MS2	0	80	52.2026	20210	A001.raw	13/120		78	38	22	3.92836e-07	5.48697e+06	52.2
	FALSE	High	Mascot (A6)	[R].SELEEDIIPEEDIISR.[S]		1	1	P01027	P01027	0	2	1	0	1	1	943.965	1886.92	0.04	4e-05	1.96763e+06	HCD (High Energy Collision Dissociation)	MS2	3.42858	80	51.8519	20037	A001.raw	9/120		78	37	22	4.13679e-07	1.37327e+07	51.97
	FALSE	High	Mascot (A6)	[R].IILQGSPVVQMAEDAVDGER.[L]		1	1	P01027	P01027	0	3	1	0	1	1	709.697	2127.08	0.26	0.00018	1.44356e+06	HCD (High Energy Collision Dissociation)	MS2	7.11922	80	61.7853	24940	A001.raw	11/216		77	37	22	3.77699e-07	7.44416e+06	61.72
	FALSE	High	Mascot (A6)	[K].TELTNIELLDDFDEYTMTIQQVIK.[S]		1	1	P01027	P01027	0	2	1	0	1	1	1436.71	2872.42	0.61	0.00088	66390.6	HCD (High Energy Collision Dissociation)	MS2	31.8402	80	78.7801	32972	A001.raw	11/260		75	37	22	7.06504e-07	418549	78.76
	FALSE	High	Mascot (A6)	[R].LVAYYTLIGASGQR.[E]		1	1	P01027	P01027	0	2	1	0	1	1	756.415	1511.82	1	0.00076	410872	HCD (High Energy Collision Dissociation)	MS2	38.0067	80	48.4624	18370	A001.raw	8/108		68	34	18	1.51643e-06	8.19278e+06	48.53
	FALSE	High	Mascot (A6)	[R].DILSSNNQHGILPLSWNIPELVNMGQWK.[I]		1	1	P01027	P01027	0	3	1	0	1	1	1068.55	3203.63	0.52	0.00056	162483	HCD (High Energy Collision Dissociation)	MS2	6.84016	80	74.5938	31073	A001.raw	23/304		68	35	20	2.1997e-06	1.74948e+06	74.51
	FALSE	High	Mascot (A6)	[R].IILQGSPVVQMAEDAVDGER.[L]		1	1	P01027	P01027	0	3	1	0	1	1	709.695	2127.07	-1.72	-0.00122	437468	HCD (High Energy Collision Dissociation)	MS2	0	80	61.3981	24752	A001.raw	10/216		68	37	22	3.47898e-06	6.95243e+06	61.42
	FALSE	High	Mascot (A6)	[R].SELEEDIIPEEDIISR.[S]		1	1	P01027	P01027	0	2	1	0	1	1	943.963	1886.92	-2.03	-0.00191	623787	HCD (High Energy Collision Dissociation)	MS2	39.0718	80	51.3919	19809	A001.raw	12/120		68	37	22	3.78502e-06
	FALSE	High	Mascot (A6)	[K].TVVILIETPDGIPVKR.[D]		1	1	P01027	P01027	1	3	1	0	1	1	584.02	1750.04	-1.55	-0.0009	419902	HCD (High Energy Collision Dissociation)	MS2	32.0386	80	49.4001	18830	A001.raw	8/124		68	24	13	1.86508e-07
	FALSE	High	Mascot (A6)	[K].FFKPAMPFDLMVFVTNPDGSPASK.[V]		1	1	P01027	P01027	0	2	1	0	1	1	1322.15	2643.29	-2.01	-0.00266	65596.3	HCD (High Energy Collision Dissociation)	MS2	0	80	69.8607	28822	A001.raw	16/268		66	38	23	5.89374e-06
	FALSE	High	Mascot (A6)	[R].IFTVDNNLLPVGK.[T]		1	1	P01027	P01027	0	2	1	0	1	1	715.407	1429.81	1.73	0.00124	1.37282e+06	HCD (High Energy Collision Dissociation)	MS2	20.3703	80	50.6755	19454	A001.raw	8/124		65	34	18	2.91745e-06	1.10038e+07	50.82
	FALSE	High	Mascot (A6)	[R].DIcEGQVNSLPGSINK.[A]	C3(Carbamidomethyl)	1	1	P01027	P01027	0	2	1	0	1	1	865.922	1730.84	-1.17	-0.00102	634052	HCD (High Energy Collision Dissociation)	MS2	0	80	37.2176	12841	A001.raw	13/160		64	36	21	7.6764e-06	3.2608e+06	37.21
	FALSE	High	Mascot (A6)	[R].VVIEDGVGDAVLTRK.[V]		1	1	P01027	P01027	1	2	1	0	1	1	785.943	1570.88	-0.76	-0.00059	431547	HCD (High Energy Collision Dissociation)	MS2	16.2491	80	38.1416	13289	A001.raw	13/116		63	33	18	3.98465e-06	2.48508e+06	38.14
	FALSE	High	Mascot (A6)	[R].DNHLAPGQQTTLR.[I]		1	2	P01027	P01027; H3BL60	0	3	1	0	1	1	484.252	1450.74	0.4	0.00019	1299792	HCD (High Energy Collision Dissociation)	MS2	8.74524	69.754	24.4149	6748	A001.raw	11/140		63	36	21	8.81964e-06	6.13992e+06	24.45
	FALSE	High	Mascot (A6)	[R].MELKPGDNLNVNFHLR.[T]		1	1	P01027	P01027	0	3	1	0	1	1	632.996	1896.97	-1.38	-0.00087	1.18145e+06	HCD (High Energy Collision Dissociation)	MS2	18.8917	80	45.0987	16698	A001.raw	11/168		62	36	21	1.01823e-05	2.96036e+06	45.2
	FALSE	High	Mascot (A6)	[R].VGLVAVDK.[G]		1	2	P01027	P01027; H3BL60	0	2	0.8065	0	1	1	400.748	800.488	0.57	0.00023	2842619	HCD (High Energy Collision Dissociation)	MS2	3.84063	29.848	27.6177	8252	A001.raw	7/56		62	32	17	4.94489e-06	5.82727e+06	27.63
	FALSE	High	Mascot (A6)	[K].LGQGGVQKVDVPAADLSDQVPDTDSETR.[I]		1	1	P01027	P01027	1	3	1	0	1	1	966.472	2897.4	-4.08	-0.00394	507025	HCD (High Energy Collision Dissociation)	MS2	0	80	40.7635	14583	A001.raw	9/316		61	39	23	2.48097e-05	2.0865e+06	40.75
	FALSE	High	Mascot (A6)	[K].VLVVTQGSNAK.[A]		1	1	P01027	P01027	0	2	0.9836	0	1	1	558.324	1115.64	-0.22	-0.00012	1.03663e+06	HCD (High Energy Collision Dissociation)	MS2	2.96057	80	22.6603	5922	A001.raw	10/100		61	34	19	8.70844e-06	1.75464e+06	22.69
	FALSE	High	Mascot (A6)	[R].DIcEGQVNSLPGSINK.[A]	C3(Carbamidomethyl)	1	1	P01027	P01027	0	2	1	0	1	1	865.921	1730.83	-1.88	-0.00163	420469	HCD (High Energy Collision Dissociation)	MS2	12.4497	80	37.5758	13019	A001.raw	13/160		60	37	22	2.0533e-05	3.24036e+06	37.48
	FALSE	High	Mascot (A6)	[K].TVLTGASGHLR.[S]		1	1	P01027	P01027	0	2	1	0	1	1	556.315	1111.62	0.59	0.00033	690230	HCD (High Energy Collision Dissociation)	MS2	40.2883	80	25.3917	7209	A001.raw	8/80		60	32	17	7.21644e-06	941196	25.41
	FALSE	High	Mascot (A6)	[K].LGQGGVQKVDVPAADLSDQVPDTDSETR.[I]		1	1	P01027	P01027	1	3	1	0	1	1	966.472	2897.4	-4.14	-0.004	409521	HCD (High Energy Collision Dissociation)	MS2	0	80	41.1165	14756	A001.raw	19/316		58	39	23	4.59855e-05	1.96365e+06	41.08
	FALSE	High	Mascot (A6)	[R].VGLVAVDK.[G]		1	2	P01027	P01027; H3BL60	0	2	0.7586	0	1	1	400.747	800.488	-0.12	-5e-05	1699694	HCD (High Energy Collision Dissociation)	MS2	9.44527	43.808	27.9561	8415	A001.raw	6/56		58	32	17	1.09435e-05
	FALSE	High	Mascot (A6)	[R].SGIPIVTSPYQIHFTK.[T]		1	1	P01027	P01027	0	3	1	0	1	1	596.661	1787.97	0.4	0.00024	1.7421e+06	HCD (High Energy Collision Dissociation)	MS2	40.4188	32.643	49.7151	18986	A001.raw	10/140		58	33	18	1.43479e-05
	FALSE	High	Mascot (A6)	[R].DIcEGQVNSLPGSINK.[A]	C3(Carbamidomethyl)	1	1	P01027	P01027	0	2	1	0	1	1	865.923	1730.84	0.87	0.00075	254595	HCD (High Energy Collision Dissociation)	MS2	0	80	36.8704	12674	A001.raw	10/160		57	37	21	3.49972e-05	1.80746e+06	36.86
	FALSE	High	Mascot (A6)	[K].SSVAVPYVIVPLK.[I]		1	1	P01027	P01027	0	2	1	0	1	1	686.416	1371.82	-0.16	-0.00011	9322323	HCD (High Energy Collision Dissociation)	MS2	8.33912	11.586	52.7438	20474	A001.raw	9/96		57	27	13	4.78012e-06	5.83366e+07	52.72
	FALSE	High	Mascot (A6)	[R].VGLVAVDKGVFVLNKK.[N]		1	2	P01027	P01027; H3BL60	2	4	1	0	1	1	422.263	1686.03	-0.13	-6e-05	897959	HCD (High Energy Collision Dissociation)	MS2	0	80	44.4581	16379	A001.raw	14/152		56	18	13	6.54546e-07	6.70021e+06	44.46
	FALSE	High	Mascot (A6)	[K].FFKPAMPFDLMVFVTNPDGSPASK.[V]		1	1	P01027	P01027	0	3	1	0	1	1	881.771	2643.3	0.02	1e-05	234801	HCD (High Energy Collision Dissociation)	MS2	15.1415	80	70.2908	29027	A001.raw	12/268		55	38	23	8.68576e-05
	FALSE	High	Mascot (A6)	[R].VGLVAVDKGVFVLNKK.[N]		1	2	P01027	P01027; H3BL60	2	4	1	0	1	1	422.263	1686.03	-1.44	-0.00061	777554	HCD (High Energy Collision Dissociation)	MS2	0	80	44.8008	16549	A001.raw	14/152		53	18	13	1.33949e-06	1.34376e+07	44.78
	FALSE	High	Mascot (A6)	[R].SELEEDIIPEEDIISR.[S]		1	1	P01027	P01027	0	2	1	0	1	1	943.966	1886.92	0.49	0.00047	195320	HCD (High Energy Collision Dissociation)	MS2	0	80	52.5776	20392	A001.raw	10/120		53	37	22	0.000126378	2.03105e+06	52.6
	FALSE	High	Mascot (A6)	[K].VYSYYNLEEScTR.[F]	C11(Carbamidomethyl)	1	1	P01027	P01027	0	2	1	0	1	1	842.368	1683.73	-1.7	-0.00143	366522	HCD (High Energy Collision Dissociation)	MS2	7.85481	80	38.8358	13632	A001.raw	7/124		52	36	21	0.000112837	4.39623e+06	38.74
	FALSE	High	Mascot (A6)	[R].QVREPGQDLVVLSLPITPEFIPSFR.[L]		1	1	P01027	P01027	1	3	1	0	1	1	946.521	2837.55	-2.47	-0.00234	409286	HCD (High Energy Collision Dissociation)	MS2	11.5631	80	70.1526	28961	A001.raw	10/288		52	31	16	3.37562e-05	2.66213e+07	70.02
	FALSE	High	Mascot (A6)	[K].TIYTPGSTVLYR.[I]		1	1	P01027	P01027	0	2	1	0	1	1	685.869	1370.73	-0.14	-0.0001	889019	HCD (High Energy Collision Dissociation)	MS2	18.9786	80	40.5233	14465	A001.raw	10/88		51	34	19	8.26785e-05	4.29056e+06	40.57
	FALSE	High	Mascot (A6)	[K].ISLAHSLTR.[V]		1	1	P01027	P01027	0	2	0.9804	0	1	1	499.293	997.579	-0.06	-3e-05	1.27854e+06	HCD (High Energy Collision Dissociation)	MS2	36.515	52.324	28.7819	8810	A001.raw	5/64		51	31	16	4.43481e-05	2.13723e+06	28.79
	FALSE	High	Mascot (A6)	[K].AcEPGVDYVYK.[T]	C2(Carbamidomethyl)	1	1	P01027	P01027	0	2	1	0	1	1	650.798	1300.59	0.28	0.00018	2.65469e+06	HCD (High Energy Collision Dissociation)	MS2	10.672	54.617	32.9094	10757	A001.raw	6/80		49	36	21	0.000221371	6.52667e+06	32.9
	FALSE	High	Mascot (A6)	[K].TVLTGASGHLR.[S]		1	1	P01027	P01027	0	2	1	0	1	1	556.315	1111.62	0.48	0.00026	451548	HCD (High Energy Collision Dissociation)	MS2	44.5642	80	24.6987	6886	A001.raw	7/80		48	32	17	0.000112544	895869	24.75
	FALSE	High	Mascot (A6)	[K].SSVAVPYVIVPLK.[I]		1	1	P01027	P01027	0	2	1	0	1	1	686.416	1371.82	-0.08	-5e-05	3915816	HCD (High Energy Collision Dissociation)	MS2	9.26413	37.719	53.0863	20641	A001.raw	9/96		48	27	13	3.51106e-05	9.08929e+06	53.1
	FALSE	High	Mascot (A6)	[K].TIYTPGSTVLYR.[I]		1	1	P01027	P01027	0	2	1	0	1	1	685.869	1370.73	-0.5	-0.00034	1.022e+06	HCD (High Energy Collision Dissociation)	MS2	26.6207	80	40.8874	14644	A001.raw	10/88		48	34	19	0.000180881	3.7829e+06	40.85
	FALSE	High	Mascot (A6)	[K].TVLTGASGHLR.[S]		1	1	P01027	P01027	0	2	1	0	1	1	556.315	1111.62	0.26	0.00014	1.67439e+06	HCD (High Energy Collision Dissociation)	MS2	20.6533	49.042	25.0498	7050	A001.raw	8/80		48	32	17	0.000122835	1.0258e+06	25.07
	FALSE	High	Mascot (A6)	[K].SSVAVPYVIVPLK.[I]		1	1	P01027	P01027	0	2	1	0	1	1	686.416	1371.82	-0.43	-0.0003	2.08926e+06	HCD (High Energy Collision Dissociation)	MS2	16.1459	41.502	52.3923	20301	A001.raw	9/96		47	27	13	4.03124e-05	2.77284e+07	52.55
	FALSE	High	Mascot (A6)	[K].VLVVTQGSNAK.[A]		1	1	P01027	P01027	0	2	0.9787	0	1	1	558.324	1115.64	-0.44	-0.00025	1.68353e+06	HCD (High Energy Collision Dissociation)	MS2	12.2025	38.689	23.0175	6088	A001.raw	7/100		47	34	19	0.000211985	4.10087e+06	23
	FALSE	High	Mascot (A6)	[R].MELKPGDNLNVNFHLR.[T]		1	1	P01027	P01027	0	4	1	0	1	1	474.999	1896.97	-0.39	-0.00018	2749091	HCD (High Energy Collision Dissociation)	MS2	28.0203	42.743	45.1084	16704	A001.raw	6/168		47	36	21	0.000344734	1.13192e+07	45.11
	FALSE	High	Mascot (A6)	[K].LSINTPNSR.[Q]		1	1	P01027	P01027	0	2	0.8913	0	1	1	501.272	1001.54	0.09	4e-05	3005618	HCD (High Energy Collision Dissociation)	MS2	24.7908	29.455	25.6528	7331	A001.raw	5/84		46	35	20	0.000320638	4.35431e+06	25.65
	FALSE	High	Mascot (A6)	[R].DNHLAPGQQTTLR.[I]		1	2	P01027	P01027; H3BL60	0	3	1	0	1	1	484.25	1450.74	-2.06	-0.001	492134	HCD (High Energy Collision Dissociation)	MS2	14.278	80	24.7775	6924	A001.raw	10/140		46	37	21	0.000492671	2.18485e+06	24.72
	FALSE	High	Mascot (A6)	[K].TVAIHTLDPEK.[L]		1	1	P01027	P01027	0	2	1	0	1	1	612.336	1223.66	0.58	0.00036	1.70379e+06	HCD (High Energy Collision Dissociation)	MS2	4.92323	78.094	28.9726	8902	A001.raw	11/80		44	34	18	0.000364562	6.43586e+06	28.93
	FALSE	High	Mascot (A6)	[K].VLVVTQGSNAK.[A]		1	1	P01027	P01027	0	2	0.9318	0	1	1	558.324	1115.64	-1.32	-0.00074	326691	HCD (High Energy Collision Dissociation)	MS2	36.9703	80	22.3194	5768	A001.raw	5/100		44	34	19	0.00044185	531095	22.32
	FALSE	High	Mascot (A6)	[K].FFKPAMPFDLMVFVTNPDGSPASK.[V]		1	1	P01027	P01027	0	3	1	0	1	1	881.773	2643.3	2.09	0.00184	323383	HCD (High Energy Collision Dissociation)	MS2	84.3549	80	69.6057	28699	A001.raw	11/268		44	38	22	0.000990695
	FALSE	High	Mascot (A6)	[R].DILSSNNQHGILPLSWNIPELVNMGQWK.[I]		1	1	P01027	P01027	0	3	1	0	1	1	1068.55	3203.63	-0.74	-0.00079	283497	HCD (High Energy Collision Dissociation)	MS2	0	80	74.246	30908	A001.raw	21/304		42	35	20	0.00078141	7.6677e+06	74.12
	FALSE	High	Mascot (A6)	[K].TVVILIETPDGIPVKR.[D]		1	1	P01027	P01027	1	3	1	0	1	1	584.02	1750.05	-0.92	-0.00054	549376	HCD (High Energy Collision Dissociation)	MS2	8.6115	80	49.0474	18657	A001.raw	6/124		42	24	13	7.77495e-05	1.87849e+06	48.99
	FALSE	High	Mascot (A6)	[K].AcEPGVDYVYK.[T]	C2(Carbamidomethyl)	1	1	P01027	P01027	0	2	1	0	1	1	650.798	1300.59	0.1	6e-05	1.16326e+06	HCD (High Energy Collision Dissociation)	MS2	14.4818	80	33.2487	10921	A001.raw	9/80		41	35	20	0.00121841	2.54814e+06	33.22
	FALSE	High	Mascot (A6)	[K].FFKPAMPFDLMVFVTNPDGSPASK.[V]		1	1	P01027	P01027	0	3	1	0	1	1	881.771	2643.3	-0.19	-0.00017	674758	HCD (High Energy Collision Dissociation)	MS2	5.16625	80	69.9456	28862	A001.raw	11/268		40	38	23	0.00238946	2.4796e+07	69.82
	FALSE	High	Mascot (A6)	[R].SGIPIVTSPYQIHFTK.[T]		1	1	P01027	P01027	0	2	1	0	1	1	894.489	1787.97	0.95	0.00085	487989	HCD (High Energy Collision Dissociation)	MS2	34.5333	80	50.1312	19190	A001.raw	12/140		40	34	18	0.00104577	2.95077e+06	50.15
	FALSE	High	Mascot (A6)	[R].EPGQDLVVLSLPITPEFIPSFR.[L]		1	1	P01027	P01027	0	3	1	0	1	1	818.781	2454.33	0.68	0.00056	153292	HCD (High Energy Collision Dissociation)	MS2	2.07784	80	74.2924	30930	A001.raw	16/240		40	32	17	0.000740532	1.61616e+06	74.3
	FALSE	High	Mascot (A6)	[K].GIcVADPYEIR.[V]	C3(Carbamidomethyl)	1	1	P01027	P01027	0	2	1	0	1	1	646.819	1292.63	-0.04	-3e-05	1.18038e+06	HCD (High Energy Collision Dissociation)	MS2	24.4558	80	41.13	14762	A001.raw	8/80		39	36	21	0.0022972	6.74482e+06	41.1
	FALSE	High	Mascot (A6)	[R].AFYEHAPK.[Q]		1	1	P01027	P01027	0	2	1	0	1	1	481.74	962.472	-0.8	-0.00038	449793	HCD (High Energy Collision Dissociation)	MS2	14.2834	80	21.0707	5205	A001.raw	6/56		39	35	19	0.00164881	918874	21.07
	FALSE	High	Mascot (A6)	[K].VLVVTQGSNAK.[A]		1	1	P01027	P01027	0	2	0.9459	0	1	1	558.325	1115.64	1.42	0.00079	341433	HCD (High Energy Collision Dissociation)	MS2	55.0493	80	23.3594	6247	A001.raw	5/100		37	34	19	0.0022246	940219	23.29
	FALSE	High	Mascot (A6)	[R].QVREPGQDLVVLSLPITPEFIPSFR.[L]		1	1	P01027	P01027	1	3	1	0	1	1	946.524	2837.56	-0.02	-2e-05	217121	HCD (High Energy Collision Dissociation)	MS2	29.5496	80	69.7942	28790	A001.raw	12/288		36	31	16	0.00144342	2.16909e+07	69.88
	FALSE	High	Mascot (A6)	[K].GVFVLNK.[K]		1	2	P01027	P01027; H3BL60	0	2	1	0	1	1	388.737	776.467	0.6	0.00023	293916	HCD (High Energy Collision Dissociation)	MS2	45.203	80	33.9268	11251	A001.raw	4/52		33	30	15	0.00198359	447629	33.93
	FALSE	High	Mascot (A6)	[K].GVFVLNKK.[N]		1	2	P01027	P01027; H3BL60	1	2	0.9394	0	1	1	452.785	904.562	0.79	0.00036	3.83777e+06	HCD (High Energy Collision Dissociation)	MS2	5.25547	17.873	27.0324	7984	A001.raw	5/64		33	29	14	0.00167135	1.01589e+07	27
	FALSE	High	Mascot (A6)	[R].VGLVAVDKGVFVLNKK.[N]		1	2	P01027	P01027; H3BL60	2	3	1	0	1	1	562.684	1686.04	3.6	0.00202	777070	HCD (High Energy Collision Dissociation)	MS2	46.6274	80	44.4143	16357	A001.raw	12/152		33	20	13	0.000233998
	FALSE	High	Mascot (A6)	[K].GVFVLNKK.[N]		1	2	P01027	P01027; H3BL60	1	2	1	0	1	1	452.785	904.562	0.52	0.00024	803981	HCD (High Energy Collision Dissociation)	MS2	23.4934	80	26.6802	7821	A001.raw	5/64		32	29	14	0.00203736
	FALSE	High	Mascot (A6)	[K].GVFVLNKK.[N]		1	2	P01027	P01027; H3BL60	1	2	1	0	1	1	452.785	904.563	1.67	0.00076	1361133	HCD (High Energy Collision Dissociation)	MS2	13.084	48.357	27.3831	8149	A001.raw	6/64		30	29	14	0.00312657	5.68255e+06	27.35
	FALSE	High	Mascot (A6)	[K].VVPEGMR.[I]		1	1	P01027	P01027	0	2	1	0	1	1	394.21	787.413	0.37	0.00015	230589	HCD (High Energy Collision Dissociation)	MS2	39.6996	80	19.4045	4498	A001.raw	5/48		30	30	15	0.00373302	396087	19.38
FALSE	Master Protein	F6VRP8	Galectin-3-binding protein (Fragment) OS=Mus musculus GN=Lgals3bp PE=1 SV=1	34.5324	3	3	1	1	139	15.4	8.47	High						High	0	173	3
	Checked	Confidence	Identifying Node	Annotated Sequence	Modifications	# Protein Groups	# Proteins	Master Protein Accessions	Protein Accessions	# Missed Cleavages	Charge	DeltaScore	DeltaCn	Rank	Search Engine Rank	m/z [Da]	MH+ [Da]	DeltaM [ppm]	Deltam/z [Da]	Intensity	Activation Type	MS Order	Isolation Interference [%]	Ion Inject Time [ms]	RT [min]	First Scan	Spectrum File	Ions Matched	XCorr	Ions Score	Identity Strict	Identity Relaxed	Expectation Value	Area	Apex RT [min]
	FALSE	High	Mascot (A6)	[R].VLILcGGYSVVDVTSFEGSK.[A]	C5(Carbamidomethyl)	2	2	F6VRP8; Q07797	F6VRP8; Q07797	0	2	1	0	1	1	1065.54	2130.08	-1.18	-0.00126	264856	HCD (High Energy Collision Dissociation)	MS2	0	80	57.2967	22740	A001.raw	11/152		89	37	22	2.69756e-08	1.20239e+07	57.36
	FALSE	High	Mascot (A6)	[K].APIPTALDTNSSK.[T]		2	2	F6VRP8; Q07797	F6VRP8; Q07797	0	2	1	0	1	1	657.849	1314.69	-0.08	-5e-05	1.31072e+06	HCD (High Energy Collision Dissociation)	MS2	10.6106	80	31.4645	10079	A001.raw	7/108		66	35	20	3.81258e-06	6.7106e+06	31.44
	FALSE	High	Mascot (A6)	[R].YQSFQTPQHPSFLFK.[D]		1	1	F6VRP8	F6VRP8	0	3	1	0	1	1	618.978	1854.92	0.39	0.00024	1778088	HCD (High Energy Collision Dissociation)	MS2	27.5492	49.388	46.9164	17607	A001.raw	9/164		45	37	22	0.000639283	6.67483e+06	46.92
FALSE	Master Protein	P99024	Tubulin beta-5 chain OS=Mus musculus OX=10090 GN=Tubb5 PE=1 SV=1	32.8829	9	18	2	1	444	49.6	4.89	High		High	0	29.65	7	High	0	370	8
	Checked	Confidence	Identifying Node	Annotated Sequence	Modifications	# Protein Groups	# Proteins	Master Protein Accessions	Protein Accessions	# Missed Cleavages	Charge	DeltaScore	DeltaCn	Rank	Search Engine Rank	m/z [Da]	MH+ [Da]	DeltaM [ppm]	Deltam/z [Da]	Intensity	Activation Type	MS Order	Isolation Interference [%]	Ion Inject Time [ms]	RT [min]	First Scan	Spectrum File	Ions Matched	XCorr	Ions Score	Identity Strict	Identity Relaxed	Expectation Value	Area	Apex RT [min]
	FALSE	High	Sequest HT (A2)	[R].SGPFGQIFRPDNFVFGQSGAGNNWAK.[G]		1	5	P99024	Q7TMM9; Q9D6F9; P99024; P68372; Q9CWF2	0	3	0.7412	0	1	1	933.452	2798.34	-1.18	-0.0011	395188	HCD (High Energy Collision Dissociation)	MS2	0	80	61.0133	24565	A001.raw	0/0	5.37					9.03433e+06	60.93
	FALSE	High	Sequest HT (A2)	[K].LTTPTYGDLNHLVSATMSGVTTcLR.[F]	C23(Carbamidomethyl)	1	5	P99024	Q7TMM9; Q9D6F9; P99024; P68372; Q9CWF2	0	3	0.6964	0	1	1	903.447	2708.33	-4.05	-0.00366	297806	HCD (High Energy Collision Dissociation)	MS2	31.4816	80	63.9398	25980	A001.raw	0/0	4.15					1.05845e+07	63.92
	FALSE	High	Sequest HT (A2)	[K].LTTPTYGDLNHLVSATMSGVTTcLR.[F]	C23(Carbamidomethyl)	1	5	P99024	Q7TMM9; Q9D6F9; P99024; P68372; Q9CWF2	0	3	0.6585	0	1	1	903.452	2708.34	1.16	0.00104	329594	HCD (High Energy Collision Dissociation)	MS2	36.9225	80	64.4226	26214	A001.raw	0/0	3.66					3.25364e+06	64.5
	FALSE	High	Sequest HT (A2)	[K].MAVTFIGNSTAIQELFKR.[I]		1	1	P99024	P99024	1	3	0.6407	0	1	1	676.032	2026.08	1.63	0.0011	446682	HCD (High Energy Collision Dissociation)	MS2	21.7207	80	61.4297	24768	A001.raw	0/0	3.59					3.93497e+06	61.42
	FALSE	High	Sequest HT (A2)	[R].IMNTFSVVPSPK.[V]		1	4	P99024	Q9D6F9; Q9ERD7; P99024; P68372	0	2	0.6813	0	1	1	660.356	1319.7	0.85	0.00056	753530	HCD (High Energy Collision Dissociation)	MS2	27.1672	80	42.9671	15663	A001.raw	0/0	2.73					3.07908e+06	42.92
	FALSE	High	Sequest HT (A2)	[R].AILVDLEPGTMDSVR.[S]		1	4	P99024	Q7TMM9; Q9ERD7; P99024; Q9CWF2	0	2	0.2721	0	1	1	808.422	1615.84	1.06	0.00086	1.43462e+06	HCD (High Energy Collision Dissociation)	MS2	7.5133	80	50.328	19283	A001.raw	0/0	2.72					8.92937e+06	50.27
	FALSE	High	Sequest HT (A2)	[R].AILVDLEPGTMDSVR.[S]		1	4	P99024	Q7TMM9; Q9ERD7; P99024; Q9CWF2	0	2	0.2852	0	1	1	808.425	1615.84	4.68	0.00379	766357	HCD (High Energy Collision Dissociation)	MS2	6.52243	80	50.7689	19501	A001.raw	0/0	2.7					6055512	50.73
	FALSE	High	Sequest HT (A2)	[K].LAVNMVPFPR.[L]		2	8	A2AQ07; P99024	Q7TMM9; Q9D6F9; Q9ERD7; A2AQ07; P99024; P68372; Q9CWF2; Q922F4	0	2	0.689	0	1	1	572.321	1143.63	0.33	0.00019	1.80599e+06	HCD (High Energy Collision Dissociation)	MS2	10.837	80	48.5546	18415	A001.raw	0/0	2.54					2.67058e+07	48.59
	FALSE	High	Sequest HT (A2)	[R].ISVYYNEATGGK.[Y]		1	1	P99024	P99024	0	2	0.5872	0	1	1	651.321	1301.63	-2.4	-0.00156	518652	HCD (High Energy Collision Dissociation)	MS2	45.812	80	31.3399	10020	A001.raw	0/0	2.18					1.19399e+06	31.33
	FALSE	High	Mascot (A6)	[K].MAVTFIGNSTAIQELFKR.[I]		1	1	P99024	P99024	1	3	1	0	1	1	676.032	2026.08	1.63	0.0011	446682	HCD (High Energy Collision Dissociation)	MS2	21.7207	80	61.4297	24768	A001.raw	10/176		89	33	18	1.02727e-08	3.93497e+06	61.42
	FALSE	High	Mascot (A6)	[R].IMNTFSVVPSPK.[V]		1	4	P99024	Q9D6F9; Q9ERD7; P99024; P68372	0	2	1	0	1	1	660.356	1319.7	0.85	0.00056	753530	HCD (High Energy Collision Dissociation)	MS2	27.1672	80	42.9671	15663	A001.raw	9/124		62	35	20	7.78423e-06	3.07908e+06	42.92
	FALSE	High	Mascot (A6)	[K].LTTPTYGDLNHLVSATMSGVTTcLR.[F]	C23(Carbamidomethyl)	1	5	P99024	Q7TMM9; Q9D6F9; P99024; P68372; Q9CWF2	0	3	1	0	1	1	903.447	2708.33	-4.05	-0.00366	297806	HCD (High Energy Collision Dissociation)	MS2	31.4816	80	63.9398	25980	A001.raw	9/252		57	38	23	4.8586e-05	1.05845e+07	63.92
	FALSE	High	Mascot (A6)	[K].LAVNMVPFPR.[L]		2	8	A2AQ07; P99024	Q7TMM9; Q9D6F9; Q9ERD7; A2AQ07; P99024; P68372; Q9CWF2; Q922F4	0	2	1	0	1	1	572.321	1143.63	0.33	0.00019	1.80599e+06	HCD (High Energy Collision Dissociation)	MS2	10.837	80	48.5546	18415	A001.raw	6/96		52	34	19	6.62449e-05	2.67058e+07	48.59
	FALSE	High	Mascot (A6)	[R].AILVDLEPGTMDSVR.[S]		1	4	P99024	Q7TMM9; Q9ERD7; P99024; Q9CWF2	0	2	0.6275	0	1	1	808.422	1615.84	1.06	0.00086	1.43462e+06	HCD (High Energy Collision Dissociation)	MS2	7.5133	80	50.328	19283	A001.raw	7/112		51	37	22	0.00015774	8.92937e+06	50.27
	FALSE	High	Mascot (A6)	[K].GHYTEGAELVDSVLDVVRK.[E]		1	7	P99024	Q7TMM9; Q9ERD7; P99024; P68372; Q9CWF2; G3UZR1; Q922F4	1	4	1	0	1	1	522.525	2087.08	0.84	0.00044	522616	HCD (High Energy Collision Dissociation)	MS2	0	80	57.4987	22841	A001.raw	13/148		50	36	21	0.000192297	3.92654e+06	57.48
	FALSE	High	Mascot (A6)	[R].ISVYYNEATGGK.[Y]		1	1	P99024	P99024	0	2	1	0	1	1	651.321	1301.63	-2.4	-0.00156	518652	HCD (High Energy Collision Dissociation)	MS2	45.812	80	31.3399	10020	A001.raw	8/112		43	36	21	0.000755993	1.19399e+06	31.33
	FALSE	High	Mascot (A6)	[R].YLTVAAVFR.[G]		1	3	P99024	Q9D6F9; P99024; P68372	0	2	0.8293	0	1	1	520.302	1039.6	2.41	0.00125	466296	HCD (High Energy Collision Dissociation)	MS2	13.3874	80	50.1109	19180	A001.raw	7/64		41	32	16	0.000534263	6.66678e+06	50.04
	FALSE	High	Mascot (A6)	[K].LTTPTYGDLNHLVSATMSGVTTcLR.[F]	C23(Carbamidomethyl)	1	5	P99024	Q7TMM9; Q9D6F9; P99024; P68372; Q9CWF2	0	3	1	0	1	1	903.452	2708.34	1.16	0.00104	329594	HCD (High Energy Collision Dissociation)	MS2	36.9225	80	64.4226	26214	A001.raw	8/252		40	38	23	0.00238364	3.25364e+06	64.5
FALSE	Master Protein	P20491	High affinity immunoglobulin epsilon receptor subunit gamma OS=Mus musculus OX=10090 GN=Fcer1g PE=1 SV=1	32.5581	2	6	2	1	86	9.6	7.97	High		High	0	11.19	2	High	0	76	1
	Checked	Confidence	Identifying Node	Annotated Sequence	Modifications	# Protein Groups	# Proteins	Master Protein Accessions	Protein Accessions	# Missed Cleavages	Charge	DeltaScore	DeltaCn	Rank	Search Engine Rank	m/z [Da]	MH+ [Da]	DeltaM [ppm]	Deltam/z [Da]	Intensity	Activation Type	MS Order	Isolation Interference [%]	Ion Inject Time [ms]	RT [min]	First Scan	Spectrum File	Ions Matched	XCorr	Ions Score	Identity Strict	Identity Relaxed	Expectation Value	Area	Apex RT [min]
	FALSE	High	Sequest HT (A2)	[R].EKADAVYTGLNTR.[S]		1	1	P20491	P20491	1	2	0.6979	0	1	1	719.371	1437.73	0.74	0.00053	1.03618e+06	HCD (High Energy Collision Dissociation)	MS2	10.3887	80	27.8711	8375	A001.raw	0/0	3.41					3.78745e+06	27.81
	FALSE	High	Sequest HT (A2)	[R].EKADAVYTGLNTR.[S]		1	1	P20491	P20491	1	3	0.6525	0	1	1	479.916	1437.73	0.95	0.00045	1.26938e+06	HCD (High Energy Collision Dissociation)	MS2	20.7622	80	27.6563	8271	A001.raw	0/0	2.82					2.29769e+06	27.65
	FALSE	High	Sequest HT (A2)	[R].SQETYETLKHEKPPQ.[-]		1	1	P20491	P20491	1	3	0.6955	0	1	1	605.635	1814.89	-1.1	-0.00066	425474	HCD (High Energy Collision Dissociation)	MS2	0	80	25.077	7062	A001.raw	0/0	2.66					773519	25.02
	FALSE	High	Sequest HT (A2)	[R].EKADAVYTGLNTR.[S]		1	1	P20491	P20491	1	2	0.7143	0	1	1	719.37	1437.73	-0.36	-0.00026	286503	HCD (High Energy Collision Dissociation)	MS2	27.2106	80	27.2497	8085	A001.raw	0/0	2.31					2.34313e+06	27.24
	FALSE	High	Mascot (A6)	[R].EKADAVYTGLNTR.[S]		1	1	P20491	P20491	1	2	1	0	1	1	719.371	1437.73	0.74	0.00053	1.03618e+06	HCD (High Energy Collision Dissociation)	MS2	10.3887	80	27.8711	8375	A001.raw	9/140		51	35	20	0.000120306	3.78745e+06	27.81
	FALSE	High	Mascot (A6)	[R].EKADAVYTGLNTR.[S]		1	1	P20491	P20491	1	2	1	0	1	1	719.37	1437.73	-0.36	-0.00026	286503	HCD (High Energy Collision Dissociation)	MS2	27.2106	80	27.2497	8085	A001.raw	7/140		38	36	20	0.00232549	2.34313e+06	27.24
FALSE	Master Protein	P62983	Ubiquitin-40S ribosomal protein S27a OS=Mus musculus OX=10090 GN=Rps27a PE=1 SV=2	31.4103	4	16	0	1	156	17.9	9.64	High		High	0	22.81	1	High	0	369	4
	Checked	Confidence	Identifying Node	Annotated Sequence	Modifications	# Protein Groups	# Proteins	Master Protein Accessions	Protein Accessions	# Missed Cleavages	Charge	DeltaScore	DeltaCn	Rank	Search Engine Rank	m/z [Da]	MH+ [Da]	DeltaM [ppm]	Deltam/z [Da]	Intensity	Activation Type	MS Order	Isolation Interference [%]	Ion Inject Time [ms]	RT [min]	First Scan	Spectrum File	Ions Matched	XCorr	Ions Score	Identity Strict	Identity Relaxed	Expectation Value	Area	Apex RT [min]
	FALSE	High	Sequest HT (A2)	[K].TITLEVEPSDTIENVK.[A]		1	4	P62983	P62984; P62983; P0CG49; P0CG50	0	2	0.6964	0	1	1	894.465	1787.92	-2.33	-0.00208	4.78329e+06	HCD (High Energy Collision Dissociation)	MS2	0	32.825	46.0788	17190	A001.raw	0/0	4.15					3.67631e+06	46.05
	FALSE	High	Sequest HT (A2)	[K].TITLEVEPSDTIENVK.[A]		1	4	P62983	P62984; P62983; P0CG49; P0CG50	0	2	0.699	0	1	1	894.466	1787.93	-1.23	-0.0011	8.17646e+06	HCD (High Energy Collision Dissociation)	MS2	1.21893	16.084	45.3833	16841	A001.raw	0/0	4.12					6.89878e+07	45.44
	FALSE	High	Sequest HT (A2)	[K].TITLEVEPSDTIENVK.[A]		1	4	P62983	P62984; P62983; P0CG49; P0CG50	0	2	0.7475	0	1	1	894.467	1787.93	-0.82	-0.00074	10544768	HCD (High Energy Collision Dissociation)	MS2	0.536216	11.376	45.7335	17016	A001.raw	0/0	3.96					6.18035e+07	45.79
	FALSE	High	Sequest HT (A2)	[K].TITLEVEPSDTIENVK.[A]		1	4	P62983	P62984; P62983; P0CG49; P0CG50	0	2	0.6735	0	1	1	894.465	1787.92	-2.19	-0.00196	1885083	HCD (High Energy Collision Dissociation)	MS2	13.9405	80	46.4211	17360	A001.raw	0/0	3.92					6.14316e+06	46.41
	FALSE	High	Sequest HT (A2)	[K].TITLEVEPSDTIENVK.[A]		1	4	P62983	P62984; P62983; P0CG49; P0CG50	0	2	0.7263	0	1	1	894.464	1787.92	-3.9	-0.00348	522910	HCD (High Energy Collision Dissociation)	MS2	0	80	45.0349	16666	A001.raw	0/0	3.58
	FALSE	High	Sequest HT (A2)	[K].TITLEVEPSDTIENVK.[A]		1	4	P62983	P62984; P62983; P0CG49; P0CG50	0	2	0.7305	0	1	1	894.468	1787.93	1.09	0.00097	770688	HCD (High Energy Collision Dissociation)	MS2	51.8478	80	46.7857	17541	A001.raw	0/0	3.08
	FALSE	High	Mascot (A6)	[K].TITLEVEPSDTIENVK.[A]		1	11	P62983	E9Q5F6; J3QK04; P62984; Q5SX22; E9Q4P0; P62983; P0CG49; E9Q9J0; A0A0A6YW67; E9QNP0; P0CG50	0	2	1	0	1	1	894.465	1787.92	-2.33	-0.00208	4.78329e+06	HCD (High Energy Collision Dissociation)	MS2	0	32.825	46.0788	17190	A001.raw	13/128		71	37	22	1.5247e-06	3.67631e+06	46.05
	FALSE	High	Mascot (A6)	[K].TITLEVEPSDTIENVK.[A]		1	11	P62983	E9Q5F6; J3QK04; P62984; Q5SX22; E9Q4P0; P62983; P0CG49; E9Q9J0; A0A0A6YW67; E9QNP0; P0CG50	0	2	1	0	1	1	894.467	1787.93	-0.82	-0.00074	10544768	HCD (High Energy Collision Dissociation)	MS2	0.536216	11.376	45.7335	17016	A001.raw	12/128		62	37	21	1.15825e-05	6.18035e+07	45.79
	FALSE	High	Mascot (A6)	[K].TITLEVEPSDTIENVK.[A]		1	11	P62983	E9Q5F6; J3QK04; P62984; Q5SX22; E9Q4P0; P62983; P0CG49; E9Q9J0; A0A0A6YW67; E9QNP0; P0CG50	0	2	1	0	1	1	894.466	1787.93	-1.23	-0.0011	8.17646e+06	HCD (High Energy Collision Dissociation)	MS2	1.21893	16.084	45.3833	16841	A001.raw	10/128		61	37	21	1.54727e-05	6.89878e+07	45.44
	FALSE	High	Mascot (A6)	[K].ESTLHLVLR.[L]		1	11	P62983	E9Q5F6; J3QK04; P62984; Q5SX22; E9Q4P0; P62983; P0CG49; E9Q9J0; A0A0A6YW67; E9QNP0; P0CG50	0	2	1	0	1	1	534.313	1067.62	-1.71	-0.00091	943185	HCD (High Energy Collision Dissociation)	MS2	15.2025	80	38.2384	13336	A001.raw	6/64		53	30	15	2.27907e-05	2.94826e+06	38.17
	FALSE	High	Mascot (A6)	[-G].MQIFVKTLTGKTITLEVEPSDTIENVK.[A]		1	9	P62983	E9Q5F6; J3QK04; P62984; Q5SX22; P62983; P0CG49; E9Q9J0; A0A0A6YW67; P0CG50	2	4	1	0	1	1	759.415	3034.64	0.25	0.00019	584478	HCD (High Energy Collision Dissociation)	MS2	78.7352	80	59.4216	23785	A001.raw	15/308		46	32	16	0.000152361	3.73591e+06	59.35
	FALSE	High	Mascot (A6)	[K].TITLEVEPSDTIENVK.[A]		1	11	P62983	E9Q5F6; J3QK04; P62984; Q5SX22; E9Q4P0; P62983; P0CG49; E9Q9J0; A0A0A6YW67; E9QNP0; P0CG50	0	2	1	0	1	1	894.465	1787.92	-2.19	-0.00196	1885083	HCD (High Energy Collision Dissociation)	MS2	13.9405	80	46.4211	17360	A001.raw	12/128		44	37	21	0.000728731	6.14316e+06	46.41
	FALSE	High	Mascot (A6)	[K].TITLEVEPSDTIENVK.[A]		1	11	P62983	E9Q5F6; J3QK04; P62984; Q5SX22; E9Q4P0; P62983; P0CG49; E9Q9J0; A0A0A6YW67; E9QNP0; P0CG50	0	2	1	0	1	1	894.464	1787.92	-3.9	-0.00348	522910	HCD (High Energy Collision Dissociation)	MS2	0	80	45.0349	16666	A001.raw	12/128		39	37	22	0.00257413
	FALSE	High	Mascot (A6)	[K].ESTLHLVLR.[L]		1	11	P62983	E9Q5F6; J3QK04; P62984; Q5SX22; E9Q4P0; P62983; P0CG49; E9Q9J0; A0A0A6YW67; E9QNP0; P0CG50	0	2	1	0	1	1	534.313	1067.62	-1.82	-0.00097	4.28306e+06	HCD (High Energy Collision Dissociation)	MS2	16.1458	31.332	37.8838	13168	A001.raw	7/64		39	31	15	0.000655
	FALSE	High	Mascot (A6)	[K].IQDKEGIPPDQQR.[L]		1	12	P62983	E9Q5F6; J3QK04; P62984; Q5SX22; E9Q4P0; P62983; P0CG49; E9Q9J0; D3YYZ2; A0A0A6YW67; E9QNP0; P0CG50	1	2	1	0	1	1	762.394	1523.78	-0.29	-0.00022	45428.6	HCD (High Energy Collision Dissociation)	MS2	64.7144	80	20.9059	5133	A001.raw	5/140		37	35	20	0.00287435	126547	20.87
	FALSE	High	Mascot (A6)	[K].ESTLHLVLR.[L]		1	11	P62983	E9Q5F6; J3QK04; P62984; Q5SX22; E9Q4P0; P62983; P0CG49; E9Q9J0; A0A0A6YW67; E9QNP0; P0CG50	0	2	1	0	1	1	534.313	1067.62	-2.62	-0.0014	9581019	HCD (High Energy Collision Dissociation)	MS2	19.7215	9.965	37.5379	13001	A001.raw	5/64		34	31	15	0.00207129	3.31498e+07	37.56
FALSE	Master Protein	P52480	Pyruvate kinase PKM OS=Mus musculus GN=Pkm PE=1 SV=4	31.2618	10	21	10	1	531	57.8	7.47	High		High	0	38.05	8	High	0	334	8
	Checked	Confidence	Identifying Node	Annotated Sequence	Modifications	# Protein Groups	# Proteins	Master Protein Accessions	Protein Accessions	# Missed Cleavages	Charge	DeltaScore	DeltaCn	Rank	Search Engine Rank	m/z [Da]	MH+ [Da]	DeltaM [ppm]	Deltam/z [Da]	Intensity	Activation Type	MS Order	Isolation Interference [%]	Ion Inject Time [ms]	RT [min]	First Scan	Spectrum File	Ions Matched	XCorr	Ions Score	Identity Strict	Identity Relaxed	Expectation Value	Area	Apex RT [min]
	FALSE	High	Sequest HT (A2)	[R].EATESFASDPILYRPVAVALDTKGPEIR.[T]		1	1	P52480	P52480	1	4	0.7598	0	1	1	762.154	3045.6	1.96	0.00149	120782	HCD (High Energy Collision Dissociation)	MS2	34.646	80	55.916	22051	A001.raw	0/0	5.37					8.90358e+06	55.95
	FALSE	High	Sequest HT (A2)	[K].KGVNLPGAAVDLPAVSEKDIQDLK.[F]		1	1	P52480	P52480	2	3	0.7995	0	1	1	826.459	2477.36	0.06	5e-05	740673	HCD (High Energy Collision Dissociation)	MS2	61.2558	80	50.7294	19482	A001.raw	0/0	4.39					3.87859e+06	50.67
	FALSE	High	Sequest HT (A2)	[R].AEGSDVANAVLDGADcIMLSGETAKGDYPLEAVR.[M]	C16(Carbamidomethyl)	1	1	P52480	P52480	1	3	0.8029	0	1	1	1165.55	3494.65	2.32	0.00271	240780	HCD (High Energy Collision Dissociation)	MS2	63.7949	80	63.8331	25929	A001.raw	0/0	4.21
	FALSE	High	Sequest HT (A2)	[R].EATESFASDPILYRPVAVALDTKGPEIR.[T]		1	1	P52480	P52480	1	3	0.8055	0	1	1	1015.86	3045.58	-4.37	-0.00443	139702	HCD (High Energy Collision Dissociation)	MS2	0	80	55.981	22083	A001.raw	0/0	3.65					2.93275e+06	55.93
	FALSE	High	Sequest HT (A2)	[R].NTGIIcTIGPASR.[S]	C6(Carbamidomethyl)	1	1	P52480	P52480	0	2	0.607	0	1	1	680.356	1359.7	-0.2	-0.00014	1.77409e+06	HCD (High Energy Collision Dissociation)	MS2	5.3436	56.528	36.2369	12366	A001.raw	0/0	3.41					9.08476e+06	36.21
	FALSE	High	Sequest HT (A2)	[R].NTGIIcTIGPASR.[S]	C6(Carbamidomethyl)	1	1	P52480	P52480	0	2	0.6392	0	1	1	680.358	1359.71	2.49	0.00169	1.02781e+06	HCD (High Energy Collision Dissociation)	MS2	10.0891	80	36.5783	12531	A001.raw	0/0	3.16					2.88394e+06	36.55
	FALSE	High	Sequest HT (A2)	[R].NTGIIcTIGPASR.[S]	C6(Carbamidomethyl)	1	1	P52480	P52480	0	2	0.5296	0	1	1	680.354	1359.7	-2.44	-0.00166	2.49777e+06	HCD (High Energy Collision Dissociation)	MS2	2.79654	80	35.8899	12198	A001.raw	0/0	3.04					13860463	35.81
	FALSE	High	Sequest HT (A2)	[R].EAEAAIYHLQLFEELRR.[L]		1	1	P52480	P52480	1	3	0.6254	0	1	1	696.702	2088.09	2.13	0.00148	330839	HCD (High Energy Collision Dissociation)	MS2	14.5668	80	53.7484	20970	A001.raw	0/0	2.91
	FALSE	High	Sequest HT (A2)	[R].AGKPVIcATQMLESMIK.[K]	C7(Carbamidomethyl)	1	1	P52480	P52480	0	3	0.6882	0	1	1	626.329	1876.97	1.44	0.0009	554748	HCD (High Energy Collision Dissociation)	MS2	38.658	80	58.3883	23279	A001.raw	0/0	2.79					3.57656e+06	58.32
	FALSE	High	Sequest HT (A2)	[R].EATESFASDPILYRPVAVALDTK.[G]		1	1	P52480	P52480	0	3	0.5752	0	1	1	831.769	2493.29	2.62	0.00218	1.31629e+06	HCD (High Energy Collision Dissociation)	MS2	25.1736	80	55.8474	22017	A001.raw	0/0	2.66					9938364	55.83
	FALSE	High	Sequest HT (A2)	[K].FGVEQDVDMVFASFIR.[K]		1	1	P52480	P52480	0	2	0.649	0	1	1	930.452	1859.9	-1.08	-0.00101	57190.2	HCD (High Energy Collision Dissociation)	MS2	36.3295	80	75.374	31442	A001.raw	0/0	2.45					1.01611e+06	75.35
	FALSE	High	Mascot (A6)	[R].NTGIIcTIGPASR.[S]	C6(Carbamidomethyl)	1	1	P52480	P52480	0	2	0.8571	0	1	1	680.358	1359.71	2.49	0.00169	1.02781e+06	HCD (High Energy Collision Dissociation)	MS2	10.0891	80	36.5783	12531	A001.raw	8/144		56	36	21	4.28018e-05	2.88394e+06	36.55
	FALSE	High	Mascot (A6)	[R].AEGSDVANAVLDGADcIMLSGETAKGDYPLEAVR.[M]	C16(Carbamidomethyl)	1	1	P52480	P52480	1	3	1	0	1	1	1165.55	3494.65	2.32	0.00271	240780	HCD (High Energy Collision Dissociation)	MS2	63.7949	80	63.8331	25929	A001.raw	23/368		55	38	23	9.26057e-05
	FALSE	High	Mascot (A6)	[K].FGVEQDVDMVFASFIR.[K]		1	1	P52480	P52480	0	2	0.8364	0	1	1	930.452	1859.9	-1.08	-0.00101	57190.2	HCD (High Energy Collision Dissociation)	MS2	36.3295	80	75.374	31442	A001.raw	11/164		55	37	22	7.50667e-05	1.01611e+06	75.35
	FALSE	High	Mascot (A6)	[R].NTGIIcTIGPASR.[S]	C6(Carbamidomethyl)	1	1	P52480	P52480	0	2	0.8679	0	1	1	680.356	1359.7	-0.2	-0.00014	1.77409e+06	HCD (High Energy Collision Dissociation)	MS2	5.3436	56.528	36.2369	12366	A001.raw	8/144		53	36	21	8.32094e-05	9.08476e+06	36.21
	FALSE	High	Mascot (A6)	[R].AGKPVIcATQMLESMIK.[K]	C7(Carbamidomethyl)	1	1	P52480	P52480	0	3	1	0	1	1	626.329	1876.97	1.44	0.0009	554748	HCD (High Energy Collision Dissociation)	MS2	38.658	80	58.3883	23279	A001.raw	6/184		49	35	20	0.000192023	3.57656e+06	58.32
	FALSE	High	Mascot (A6)	[K].KGVNLPGAAVDLPAVSEKDIQDLK.[F]		1	1	P52480	P52480	2	3	1	0	1	1	826.459	2477.36	0.06	5e-05	740673	HCD (High Energy Collision Dissociation)	MS2	61.2558	80	50.7294	19482	A001.raw	21/276		48	31	15	7.81163e-05	3.87859e+06	50.67
	FALSE	High	Mascot (A6)	[R].VNLAMDVGK.[A]		1	1	P52480	P52480	0	2	1	0	1	1	473.755	946.503	0.3	0.00014	353995	HCD (High Energy Collision Dissociation)	MS2	8.49746	80	33.198	10896	A001.raw	7/92		46	35	19	0.00032669
	FALSE	High	Mascot (A6)	[R].NTGIIcTIGPASR.[S]	C6(Carbamidomethyl)	1	1	P52480	P52480	0	2	0.6957	0	1	1	680.354	1359.7	-2.44	-0.00166	2.49777e+06	HCD (High Energy Collision Dissociation)	MS2	2.79654	80	35.8899	12198	A001.raw	8/144		46	36	20	0.000414257	13860463	35.81
	FALSE	High	Mascot (A6)	[R].EAEAAIYHLQLFEELRR.[L]		1	1	P52480	P52480	1	3	1	0	1	1	696.702	2088.09	2.13	0.00148	330839	HCD (High Energy Collision Dissociation)	MS2	14.5668	80	53.7484	20970	A001.raw	8/156		38	36	21	0.00245388
	FALSE	High	Mascot (A6)	[R].GIFPVLcK.[D]	C7(Carbamidomethyl)	1	1	P52480	P52480	0	2	0.8529	0	1	1	467.264	933.522	-1.12	-0.00052	1.62804e+06	HCD (High Energy Collision Dissociation)	MS2	8.04571	48.222	46.2377	17271	A001.raw	5/56		34	34	19	0.00389319	5.92528e+06	46.2
FALSE	Master Protein	P16858	Glyceraldehyde-3-phosphate dehydrogenase OS=Mus musculus OX=10090 GN=Gapdh PE=1 SV=2	30.9309	7	52	0	1	333	35.8	8.25	High		High	0	111.21	5	High	0	1616	7
	Checked	Confidence	Identifying Node	Annotated Sequence	Modifications	# Protein Groups	# Proteins	Master Protein Accessions	Protein Accessions	# Missed Cleavages	Charge	DeltaScore	DeltaCn	Rank	Search Engine Rank	m/z [Da]	MH+ [Da]	DeltaM [ppm]	Deltam/z [Da]	Intensity	Activation Type	MS Order	Isolation Interference [%]	Ion Inject Time [ms]	RT [min]	First Scan	Spectrum File	Ions Matched	XCorr	Ions Score	Identity Strict	Identity Relaxed	Expectation Value	Area	Apex RT [min]
	FALSE	High	Sequest HT (A2)	[K].VIHDNFGIVEGLMTTVHAITATQK.[T]		1	1	P16858	P16858	0	3	0.8368	0	1	1	865.792	2595.36	0.93	0.0008	1.02329e+06	HCD (High Energy Collision Dissociation)	MS2	15.7754	80	68.2507	28050	A001.raw	0/0	8.58					3.44396e+07	68.26
	FALSE	High	Sequest HT (A2)	[K].VIHDNFGIVEGLMTTVHAITATQK.[T]		1	1	P16858	P16858	0	3	0.8555	0	1	1	865.793	2595.37	2.2	0.0019	263373	HCD (High Energy Collision Dissociation)	MS2	7.80293	80	68.7561	28292	A001.raw	0/0	7.82					1.71858e+06	68.73
	FALSE	High	Sequest HT (A2)	[K].VIHDNFGIVEGLMTTVHAITATQK.[T]		1	1	P16858	P16858	0	4	0.7229	0	1	1	649.596	2595.36	1.25	0.00081	768038	HCD (High Energy Collision Dissociation)	MS2	4.93547	80	68.4323	28137	A001.raw	0/0	6.82					8.06766e+07	68.27
	FALSE	High	Sequest HT (A2)	[K].VIHDNFGIVEGLMTTVHAITATQK.[T]		1	1	P16858	P16858	0	4	0.7301	0	1	1	649.596	2595.36	0.59	0.00038	616930	HCD (High Energy Collision Dissociation)	MS2	1.84717	80	68.779	28303	A001.raw	0/0	6.41					7.98593e+06	68.85
	FALSE	High	Sequest HT (A2)	[K].VIHDNFGIVEGLMTTVHAITATQK.[T]		1	1	P16858	P16858	0	3	0.843	0	1	1	865.792	2595.36	1.07	0.00092	208119	HCD (High Energy Collision Dissociation)	MS2	11.2562	80	69.0992	28456	A001.raw	0/0	6.37					241012	69.14
	FALSE	High	Sequest HT (A2)	[K].VIHDNFGIVEGLMTTVHAITATQK.[T]		1	1	P16858	P16858	0	4	0.7093	0	1	1	649.595	2595.36	-0.54	-0.00035	207413	HCD (High Energy Collision Dissociation)	MS2	5.00286	80	69.4738	28636	A001.raw	0/0	5.71					2573838	69.53
	FALSE	High	Sequest HT (A2)	[K].VIHDNFGIVEGLMTTVHAITATQK.[T]		1	1	P16858	P16858	0	3	0.8175	0	1	1	865.793	2595.36	1.91	0.00166	123056	HCD (High Energy Collision Dissociation)	MS2	22.4042	80	69.4435	28621	A001.raw	0/0	5.59					1.63939e+06	69.39
	FALSE	High	Sequest HT (A2)	[K].VIHDNFGIVEGLMTTVHAITATQK.[T]		1	1	P16858	P16858	0	4	0.6686	0	1	1	649.596	2595.36	0.69	0.00045	148654	HCD (High Energy Collision Dissociation)	MS2	34.5632	80	68.0897	27973	A001.raw	0/0	5.28					8.06766e+07	68.27
	FALSE	High	Sequest HT (A2)	[K].VIHDNFGIVEGLMTTVHAITATQK.[T]		1	1	P16858	P16858	0	4	0.7414	0	1	1	649.596	2595.36	0.4	0.00026	289455	HCD (High Energy Collision Dissociation)	MS2	5.24155	80	69.1221	28467	A001.raw	0/0	5.26					2.65246e+06	69
	FALSE	High	Sequest HT (A2)	[K].IVSNAScTTNcLAPLAK.[V]	C7(Carbamidomethyl); C11(Carbamidomethyl)	1	1	P16858	P16858	0	2	0.7841	0	1	1	910.455	1819.9	-1.2	-0.00109	1.38791e+06	HCD (High Energy Collision Dissociation)	MS2	0	80	36.2582	12377	A001.raw	0/0	4.91					2.3925e+06	36.21
	FALSE	High	Sequest HT (A2)	[K].IVSNAScTTNcLAPLAK.[V]	C7(Carbamidomethyl); C11(Carbamidomethyl)	1	1	P16858	P16858	0	2	0.7821	0	1	1	910.455	1819.9	-1.06	-0.00097	1.93613e+06	HCD (High Energy Collision Dissociation)	MS2	8.82433	80	35.9072	12206	A001.raw	0/0	4.59					8.74226e+06	35.95
	FALSE	High	Sequest HT (A2)	[K].VIHDNFGIVEGLMTTVHAITATQK.[T]		1	1	P16858	P16858	0	4	0.7231	0	1	1	649.596	2595.36	0.22	0.00014	112611	HCD (High Energy Collision Dissociation)	MS2	21.3551	80	69.8383	28811	A001.raw	0/0	4.55					1.11892e+06	69.76
	FALSE	High	Sequest HT (A2)	[R].VPTPNVSVVDLTcR.[L]	C13(Carbamidomethyl)	1	2	P16858	Q64467; P16858	0	2	0.8834	0	1	1	778.908	1556.81	-0.31	-0.00024	3.08942e+06	HCD (High Energy Collision Dissociation)	MS2	0	49.236	44.9781	16639	A001.raw	0/0	3.86					3.27555e+06	44.98
	FALSE	High	Sequest HT (A2)	[K].LISWYDNEYGYSNR.[V]		1	1	P16858	P16858	0	2	0.8441	0	1	1	890.401	1779.79	-1.65	-0.00147	2.0239e+06	HCD (High Energy Collision Dissociation)	MS2	4.98335	80	46.2133	17258	A001.raw	0/0	3.72
	FALSE	High	Sequest HT (A2)	[R].GAAQNIIPASTGAAK.[A]		1	1	P16858	P16858	0	2	0.7534	0	1	1	685.375	1369.74	-0.14	-0.0001	4.44248e+06	HCD (High Energy Collision Dissociation)	MS2	0	28.708	29.4575	9137	A001.raw	0/0	3.69					9.90829e+06	29.47
	FALSE	High	Sequest HT (A2)	[K].IVSNAScTTNcLAPLAK.[V]	C7(Carbamidomethyl); C11(Carbamidomethyl)	1	1	P16858	P16858	0	2	0.7449	0	1	1	910.458	1819.91	2.16	0.00196	804296	HCD (High Energy Collision Dissociation)	MS2	32.2397	80	35.5534	12042	A001.raw	0/0	3.41					1562264	35.53
	FALSE	High	Sequest HT (A2)	[R].VPTPNVSVVDLTcR.[L]	C13(Carbamidomethyl)	1	2	P16858	Q64467; P16858	0	2	0.855	0	1	1	778.91	1556.81	1.41	0.0011	9731694	HCD (High Energy Collision Dissociation)	MS2	0	18.894	44.6245	16463	A001.raw	0/0	3.38					9.88192e+07	44.62
	FALSE	High	Sequest HT (A2)	[K].IVSNAScTTNcLAPLAK.[V]	C7(Carbamidomethyl); C11(Carbamidomethyl)	1	1	P16858	P16858	0	2	0.7351	0	1	1	910.457	1819.91	1.82	0.00166	307535	HCD (High Energy Collision Dissociation)	MS2	6.60121	80	36.6098	12547	A001.raw	0/0	3.36					2.43139e+06	36.7
	FALSE	High	Sequest HT (A2)	[K].LISWYDNEYGYSNR.[V]		1	1	P16858	P16858	0	2	0.8078	0	1	1	890.4	1779.79	-2.2	-0.00195	564953	HCD (High Energy Collision Dissociation)	MS2	14.5337	80	45.8489	17075	A001.raw	0/0	3.33					5.70539e+06	45.9
	FALSE	High	Sequest HT (A2)	[R].VPTPNVSVVDLTcR.[L]	C13(Carbamidomethyl)	1	2	P16858	Q64467; P16858	0	2	0.8083	0	1	1	778.911	1556.81	3.14	0.00244	271654	HCD (High Energy Collision Dissociation)	MS2	0	80	44.2653	16283	A001.raw	0/0	3.13
	FALSE	High	Sequest HT (A2)	[R].GAAQNIIPASTGAAK.[A]		1	1	P16858	P16858	0	2	0.7264	0	1	1	685.378	1369.75	3.42	0.00235	1.67079e+06	HCD (High Energy Collision Dissociation)	MS2	13.205	80	30.1476	9459	A001.raw	0/0	3.07					3.77737e+06	30.13
	FALSE	High	Sequest HT (A2)	[R].VPTPNVSVVDLTcR.[L]	C13(Carbamidomethyl)	1	2	P16858	Q64467; P16858	0	2	0.7228	0	1	1	778.91	1556.81	2.04	0.00159	281147	HCD (High Energy Collision Dissociation)	MS2	33.0638	80	45.3685	16834	A001.raw	0/0	3.03					3.49306e+06	45.39
	FALSE	High	Sequest HT (A2)	[R].GAAQNIIPASTGAAK.[A]		1	1	P16858	P16858	0	2	0.7458	0	1	1	685.376	1369.75	1.37	0.00094	2.76079e+06	HCD (High Energy Collision Dissociation)	MS2	0	39.918	29.8012	9301	A001.raw	0/0	2.99
	FALSE	High	Sequest HT (A2)	[R].GAAQNIIPASTGAAK.[A]		1	1	P16858	P16858	0	2	0.688	0	1	1	685.378	1369.75	3.51	0.00241	461351	HCD (High Energy Collision Dissociation)	MS2	0	80	30.4914	9618	A001.raw	0/0	2.34
	FALSE	High	Mascot (A6)	[K].VIHDNFGIVEGLMTTVHAITATQK.[T]		1	5	P16858	A0A0A0MQF6; D3YYI5; P16858; S4R1W1; S4R257	0	3	1	0	1	1	865.792	2595.36	1.07	0.00092	208119	HCD (High Energy Collision Dissociation)	MS2	11.2562	80	69.0992	28456	A001.raw	20/260		110	35	20	1.3296e-10	241012	69.14
	FALSE	High	Mascot (A6)	[K].VIHDNFGIVEGLMTTVHAITATQK.[T]		1	5	P16858	A0A0A0MQF6; D3YYI5; P16858; S4R1W1; S4R257	0	3	1	0	1	1	865.793	2595.37	2.2	0.0019	263373	HCD (High Energy Collision Dissociation)	MS2	7.80293	80	68.7561	28292	A001.raw	23/260		105	35	20	4.07633e-10	1.71858e+06	68.73
	FALSE	High	Mascot (A6)	[K].VIHDNFGIVEGLMTTVHAITATQK.[T]		1	5	P16858	A0A0A0MQF6; D3YYI5; P16858; S4R1W1; S4R257	0	3	1	0	1	1	865.793	2595.36	1.91	0.00166	123056	HCD (High Energy Collision Dissociation)	MS2	22.4042	80	69.4435	28621	A001.raw	20/260		102	35	20	8.08371e-10	1.63939e+06	69.39
	FALSE	High	Mascot (A6)	[K].IVSNAScTTNcLAPLAK.[V]	C7(Carbamidomethyl); C11(Carbamidomethyl)	1	5	P16858	A0A0A0MQF6; V9GXA7; D3YYI5; P16858; S4R257	0	2	1	0	1	1	910.457	1819.91	1.82	0.00166	307535	HCD (High Energy Collision Dissociation)	MS2	6.60121	80	36.6098	12547	A001.raw	11/180		102	37	22	1.67999e-09	2.43139e+06	36.7
	FALSE	High	Mascot (A6)	[K].IVSNAScTTNcLAPLAK.[V]	C7(Carbamidomethyl); C11(Carbamidomethyl)	1	5	P16858	A0A0A0MQF6; V9GXA7; D3YYI5; P16858; S4R257	0	2	1	0	1	1	910.455	1819.9	-1.2	-0.00109	1.38791e+06	HCD (High Energy Collision Dissociation)	MS2	0	80	36.2582	12377	A001.raw	14/180		97	38	23	4.65514e-09	2.3925e+06	36.21
	FALSE	High	Mascot (A6)	[K].VIHDNFGIVEGLMTTVHAITATQK.[T]		1	5	P16858	A0A0A0MQF6; D3YYI5; P16858; S4R1W1; S4R257	0	3	1	0	1	1	865.792	2595.36	0.93	0.0008	1.02329e+06	HCD (High Energy Collision Dissociation)	MS2	15.7754	80	68.2507	28050	A001.raw	20/260		96	35	20	3.44433e-09	3.44396e+07	68.26
	FALSE	High	Mascot (A6)	[R].VPTPNVSVVDLTcR.[L]	C13(Carbamidomethyl)	1	6	P16858	A0A0A0MQF6; Q64467; P16858; S4R1W1; S4R257; S4R2G5	0	2	1	0	1	1	778.911	1556.81	3.14	0.00244	271654	HCD (High Energy Collision Dissociation)	MS2	0	80	44.2653	16283	A001.raw	11/140		85	36	21	5.37953e-08
	FALSE	High	Mascot (A6)	[K].IVSNAScTTNcLAPLAK.[V]	C7(Carbamidomethyl); C11(Carbamidomethyl)	1	5	P16858	A0A0A0MQF6; V9GXA7; D3YYI5; P16858; S4R257	0	2	1	0	1	1	910.455	1819.9	-1.06	-0.00097	1.93613e+06	HCD (High Energy Collision Dissociation)	MS2	8.82433	80	35.9072	12206	A001.raw	14/180		85	38	23	7.76208e-08	8.74226e+06	35.95
	FALSE	High	Mascot (A6)	[R].VPTPNVSVVDLTcR.[L]	C13(Carbamidomethyl)	1	6	P16858	A0A0A0MQF6; Q64467; P16858; S4R1W1; S4R257; S4R2G5	0	2	1	0	1	1	778.91	1556.81	1.41	0.0011	9731694	HCD (High Energy Collision Dissociation)	MS2	0	18.894	44.6245	16463	A001.raw	9/140		84	36	21	5.77864e-08	9.88192e+07	44.62
	FALSE	High	Mascot (A6)	[R].VPTPNVSVVDLTcR.[L]	C13(Carbamidomethyl)	1	6	P16858	A0A0A0MQF6; Q64467; P16858; S4R1W1; S4R257; S4R2G5	0	2	1	0	1	1	778.908	1556.81	-0.31	-0.00024	3.08942e+06	HCD (High Energy Collision Dissociation)	MS2	0	49.236	44.9781	16639	A001.raw	9/140		84	36	20	5.97207e-08	3.27555e+06	44.98
	FALSE	High	Mascot (A6)	[K].VIHDNFGIVEGLMTTVHAITATQK.[T]		1	5	P16858	A0A0A0MQF6; D3YYI5; P16858; S4R1W1; S4R257	0	4	1	0	1	1	649.596	2595.36	1.25	0.00081	768038	HCD (High Energy Collision Dissociation)	MS2	4.93547	80	68.4323	28137	A001.raw	19/260		75	35	20	4.03164e-07	8.06766e+07	68.27
	FALSE	High	Mascot (A6)	[K].VIHDNFGIVEGLMTTVHAITATQK.[T]		1	5	P16858	A0A0A0MQF6; D3YYI5; P16858; S4R1W1; S4R257	0	4	1	0	1	1	649.596	2595.36	0.59	0.00038	616930	HCD (High Energy Collision Dissociation)	MS2	1.84717	80	68.779	28303	A001.raw	19/260		72	35	20	7.8905e-07	7.98593e+06	68.85
	FALSE	High	Mascot (A6)	[K].VIHDNFGIVEGLMTTVHAITATQK.[T]		1	5	P16858	A0A0A0MQF6; D3YYI5; P16858; S4R1W1; S4R257	0	4	1	0	1	1	649.595	2595.36	-0.54	-0.00035	207413	HCD (High Energy Collision Dissociation)	MS2	5.00286	80	69.4738	28636	A001.raw	19/260		71	35	20	9.90195e-07	2573838	69.53
	FALSE	High	Mascot (A6)	[K].VIHDNFGIVEGLMTTVHAITATQK.[T]		1	5	P16858	A0A0A0MQF6; D3YYI5; P16858; S4R1W1; S4R257	0	4	1	0	1	1	649.596	2595.36	0.69	0.00045	148654	HCD (High Energy Collision Dissociation)	MS2	34.5632	80	68.0897	27973	A001.raw	19/260		71	35	20	9.71116e-07	8.06766e+07	68.27
	FALSE	High	Mascot (A6)	[K].LISWYDNEYGYSNR.[V]		1	5	P16858	A0A0A0MQF6; D3YYI5; P16858; S4R1W1; S4R257	0	2	1	0	1	1	890.401	1779.79	-1.65	-0.00147	2.0239e+06	HCD (High Energy Collision Dissociation)	MS2	4.98335	80	46.2133	17258	A001.raw	9/132		71	37	22	1.56774e-06
	FALSE	High	Mascot (A6)	[K].IVSNAScTTNcLAPLAK.[V]	C7(Carbamidomethyl); C11(Carbamidomethyl)	1	5	P16858	A0A0A0MQF6; V9GXA7; D3YYI5; P16858; S4R257	0	2	1	0	1	1	910.458	1819.91	2.16	0.00196	804296	HCD (High Energy Collision Dissociation)	MS2	32.2397	80	35.5534	12042	A001.raw	14/180		69	37	22	2.88004e-06	1562264	35.53
	FALSE	High	Mascot (A6)	[K].VIHDNFGIVEGLMTTVHAITATQK.[T]		1	5	P16858	A0A0A0MQF6; D3YYI5; P16858; S4R1W1; S4R257	0	4	1	0	1	1	649.596	2595.36	0.22	0.00014	112611	HCD (High Energy Collision Dissociation)	MS2	21.3551	80	69.8383	28811	A001.raw	18/260		67	35	20	2.80465e-06	1.11892e+06	69.76
	FALSE	High	Mascot (A6)	[K].VIHDNFGIVEGLMTTVHAITATQK.[T]		1	5	P16858	A0A0A0MQF6; D3YYI5; P16858; S4R1W1; S4R257	0	4	1	0	1	1	649.596	2595.36	0.4	0.00026	289455	HCD (High Energy Collision Dissociation)	MS2	5.24155	80	69.1221	28467	A001.raw	17/260		60	35	20	1.51607e-05	2.65246e+06	69
	FALSE	High	Mascot (A6)	[K].LISWYDNEYGYSNR.[V]		1	5	P16858	A0A0A0MQF6; D3YYI5; P16858; S4R1W1; S4R257	0	2	1	0	1	1	890.4	1779.79	-2.2	-0.00195	564953	HCD (High Energy Collision Dissociation)	MS2	14.5337	80	45.8489	17075	A001.raw	8/132		57	37	22	4.01449e-05	5.70539e+06	45.9
	FALSE	High	Mascot (A6)	[R].VPTPNVSVVDLTcR.[L]	C13(Carbamidomethyl)	1	6	P16858	A0A0A0MQF6; Q64467; P16858; S4R1W1; S4R257; S4R2G5	0	2	1	0	1	1	778.91	1556.81	2.04	0.00159	281147	HCD (High Energy Collision Dissociation)	MS2	33.0638	80	45.3685	16834	A001.raw	9/140		57	36	21	3.53878e-05	3.49306e+06	45.39
	FALSE	High	Mascot (A6)	[K].LTGMAFR.[V]		1	7	P16858	A0A0A0MQF6; Q64467; D3YYI5; P16858; S4R1W1; S4R257; S4R2G5	0	2	0.9643	0	1	1	398.213	795.418	-0.27	-0.00011	772494	HCD (High Energy Collision Dissociation)	MS2	12.5752	80	32.2019	10413	A001.raw	6/48		56	25	13	3.83788e-06	3.09065e+06	32.14
	FALSE	High	Mascot (A6)	[K].LTGMAFR.[V]		1	7	P16858	A0A0A0MQF6; Q64467; D3YYI5; P16858; S4R1W1; S4R257; S4R2G5	0	2	0.98	0	1	1	398.212	795.418	-0.65	-0.00026	3535417	HCD (High Energy Collision Dissociation)	MS2	5.72957	25.322	31.8454	10247	A001.raw	6/48		50	25	13	1.52789e-05	5.20531e+06	31.84
	FALSE	High	Mascot (A6)	[K].LTGMAFR.[V]		1	7	P16858	A0A0A0MQF6; Q64467; D3YYI5; P16858; S4R1W1; S4R257; S4R2G5	0	2	1	0	1	1	398.213	795.419	1.03	0.00041	4.69294e+06	HCD (High Energy Collision Dissociation)	MS2	4.32366	17.552	31.4926	10092	A001.raw	6/48		50	26	13	1.64184e-05	1.39673e+07	31.44
	FALSE	High	Mascot (A6)	[R].GAAQNIIPASTGAAK.[A]		1	4	P16858	A0A0A0MQF6; P16858; S4R1W1; S4R257	0	2	1	0	1	1	685.375	1369.74	-0.14	-0.0001	4.44248e+06	HCD (High Energy Collision Dissociation)	MS2	0	28.708	29.4575	9137	A001.raw	10/156		49	33	18	0.000117878	9.90829e+06	29.47
	FALSE	High	Mascot (A6)	[R].GAAQNIIPASTGAAK.[A]		1	4	P16858	A0A0A0MQF6; P16858; S4R1W1; S4R257	0	2	1	0	1	1	685.376	1369.75	1.37	0.00094	2.76079e+06	HCD (High Energy Collision Dissociation)	MS2	0	39.918	29.8012	9301	A001.raw	10/156		47	33	18	0.000195408
	FALSE	High	Mascot (A6)	[K].VIHDNFGIVEGLMTTVHAITATQK.[T]		1	5	P16858	A0A0A0MQF6; D3YYI5; P16858; S4R1W1; S4R257	0	4	1	0	1	1	649.597	2595.36	1.82	0.00118	58222.2	HCD (High Energy Collision Dissociation)	MS2	16.6175	80	70.2272	28997	A001.raw	17/260		37	35	20	0.00234213	1.6215e+06	70.12
	FALSE	High	Mascot (A6)	[R].GAAQNIIPASTGAAK.[A]		1	4	P16858	A0A0A0MQF6; P16858; S4R1W1; S4R257	0	2	1	0	1	1	685.378	1369.75	3.42	0.00235	1.67079e+06	HCD (High Energy Collision Dissociation)	MS2	13.205	80	30.1476	9459	A001.raw	10/156		36	34	19	0.00249555	3.77737e+06	30.13
	FALSE	High	Mascot (A6)	[R].LEKPAKYDDIKK.[V]		1	4	P16858	A0A0A0MQF6; D3YYI5; P16858; S4R257	2	3	0.9714	0	1	1	483.277	1447.82	0.03	2e-05	239941	HCD (High Energy Collision Dissociation)	MS2	12.4729	80	19.192	4412	A001.raw	7/124		35	32	17	0.00211489	436013	19.18
FALSE	Master Protein	P21956	Lactadherin OS=Mus musculus OX=10090 GN=Mfge8 PE=1 SV=3	27.6458	10	20	10	1	463	51.2	6.52	High		High	0	33.11	6	High	0	323	8
	Checked	Confidence	Identifying Node	Annotated Sequence	Modifications	# Protein Groups	# Proteins	Master Protein Accessions	Protein Accessions	# Missed Cleavages	Charge	DeltaScore	DeltaCn	Rank	Search Engine Rank	m/z [Da]	MH+ [Da]	DeltaM [ppm]	Deltam/z [Da]	Intensity	Activation Type	MS Order	Isolation Interference [%]	Ion Inject Time [ms]	RT [min]	First Scan	Spectrum File	Ions Matched	XCorr	Ions Score	Identity Strict	Identity Relaxed	Expectation Value	Area	Apex RT [min]
	FALSE	High	Sequest HT (A2)	[R].TGIVNAWTASNYDSKPWIQVNLLR.[K]		1	1	P21956	P21956	0	3	0.7219	0	1	1	916.149	2746.43	1	0.00092	625416	HCD (High Energy Collision Dissociation)	MS2	0	80	61.8919	24991	A001.raw	0/0	5.61					2.03954e+07	61.94
	FALSE	High	Sequest HT (A2)	[R].KFEFIQDESGGDKEFLGNLDNNSLK.[V]		1	1	P21956	P21956	2	3	0.7851	0	1	1	948.794	2844.37	-0.41	-0.00039	332139	HCD (High Energy Collision Dissociation)	MS2	0	80	51.0187	19625	A001.raw	0/0	4.98					7.36959e+06	51.02
	FALSE	High	Sequest HT (A2)	[R].TGIVNAWTASNYDSKPWIQVNLLR.[K]		1	1	P21956	P21956	0	3	0.8246	0	1	1	916.148	2746.43	-1.07	-0.00098	292129	HCD (High Energy Collision Dissociation)	MS2	0	80	62.2646	25172	A001.raw	0/0	4.22					4.84825e+06	62.26
	FALSE	High	Sequest HT (A2)	[R].DFGHIQYVASYK.[V]		1	1	P21956	P21956	0	2	0.7265	0	1	1	714.349	1427.69	-3.1	-0.00221	163117	HCD (High Energy Collision Dissociation)	MS2	18.0892	80	38.8001	13614	A001.raw	0/0	3.4					2.94448e+06	38.73
	FALSE	High	Sequest HT (A2)	[R].DFGHIQYVASYK.[V]		1	1	P21956	P21956	0	3	0.564	0	1	1	476.57	1427.69	-0.39	-0.00019	457797	HCD (High Energy Collision Dissociation)	MS2	47.9546	80	39.0405	13733	A001.raw	0/0	2.89					2.46279e+06	39.13
	FALSE	High	Sequest HT (A2)	[R].AFGWYPHLGR.[L]		1	1	P21956	P21956	0	2	0.6912	0	1	1	602.307	1203.61	0.18	0.00011	1.84579e+06	HCD (High Energy Collision Dissociation)	MS2	18.0601	48.661	46.0406	17172	A001.raw	0/0	2.72					1.04965e+07	46.03
	FALSE	High	Sequest HT (A2)	[R].DFGHIQYVASYK.[V]		1	1	P21956	P21956	0	3	0.5867	0	1	1	476.57	1427.7	0.05	3e-05	841993	HCD (High Energy Collision Dissociation)	MS2	47.958	79.526	39.4323	13928	A001.raw	0/0	2.71					3.45665e+06	39.42
	FALSE	High	Sequest HT (A2)	[K].INAWTAQSNSAK.[E]		1	1	P21956	P21956	0	2	0.4719	0	1	1	645.826	1290.65	1.54	0.00099	391813	HCD (High Energy Collision Dissociation)	MS2	21.5144	80	25.8034	7404	A001.raw	0/0	2.31					2.04885e+06	25.8
	FALSE	High	Sequest HT (A2)	[K].INAWTAQSNSAK.[E]		1	1	P21956	P21956	0	2	0.2752	0	1	1	645.826	1290.64	0.78	0.00051	367304	HCD (High Energy Collision Dissociation)	MS2	30.2696	80	25.4431	7234	A001.raw	0/0	2.18					3.52884e+06	25.38
	FALSE	High	Sequest HT (A2)	[K].cLVTLDTQR.[G]	C1(Carbamidomethyl)	1	1	P21956	P21956	0	2	0.4476	0	1	1	553.289	1105.57	2.91	0.00161	831795	HCD (High Energy Collision Dissociation)	MS2	45.5992	80	33.4508	11016	A001.raw	0/0	2.1					7.59238e+06	33.43
	FALSE	High	Mascot (A6)	[R].TGIVNAWTASNYDSKPWIQVNLLR.[K]		1	1	P21956	P21956	0	3	1	0	1	1	916.149	2746.43	1	0.00092	625416	HCD (High Energy Collision Dissociation)	MS2	0	80	61.8919	24991	A001.raw	10/260		78	35	20	2.06422e-07	2.03954e+07	61.94
	FALSE	High	Mascot (A6)	[R].TGIVNAWTASNYDSKPWIQVNLLR.[K]		1	1	P21956	P21956	0	3	1	0	1	1	916.148	2746.43	-1.07	-0.00098	292129	HCD (High Energy Collision Dissociation)	MS2	0	80	62.2646	25172	A001.raw	20/260		58	35	20	2.01344e-05	4.84825e+06	62.26
	FALSE	High	Mascot (A6)	[K].VAYSLDGR.[K]		1	1	P21956	P21956	0	2	0.9778	0	1	1	440.731	880.454	1.75	0.00077	887359	HCD (High Energy Collision Dissociation)	MS2	33.4132	80	26.8215	7883	A001.raw	7/56		45	35	19	0.000385467	2.21127e+06	26.84
	FALSE	High	Mascot (A6)	[R].KFEFIQDESGGDKEFLGNLDNNSLK.[V]		1	1	P21956	P21956	2	3	1	0	1	1	948.794	2844.37	-0.41	-0.00039	332139	HCD (High Energy Collision Dissociation)	MS2	0	80	51.0187	19625	A001.raw	18/288		41	37	22	0.00209121	7.36959e+06	51.02
	FALSE	High	Mascot (A6)	[K].INAWTAQSNSAK.[E]		1	1	P21956	P21956	0	2	1	0	1	1	645.826	1290.64	0.78	0.00051	367304	HCD (High Energy Collision Dissociation)	MS2	30.2696	80	25.4431	7234	A001.raw	10/128		41	36	21	0.00148699	3.52884e+06	25.38
	FALSE	High	Mascot (A6)	[K].INAWTAQSNSAK.[E]		1	1	P21956	P21956	0	2	0.9737	0	1	1	645.826	1290.65	1.54	0.00099	391813	HCD (High Energy Collision Dissociation)	MS2	21.5144	80	25.8034	7404	A001.raw	9/128		38	36	21	0.00276601	2.04885e+06	25.8
	FALSE	High	Mascot (A6)	[R].AFGWYPHLGR.[L]		1	1	P21956	P21956	0	2	1	0	1	1	602.307	1203.61	0.18	0.00011	1.84579e+06	HCD (High Energy Collision Dissociation)	MS2	18.0601	48.661	46.0406	17172	A001.raw	8/72		37	36	21	0.00324908	1.04965e+07	46.03
	FALSE	High	Mascot (A6)	[K].NIFEKPFMAR.[Y]		1	1	P21956	P21956	0	3	1	0	1	1	418.222	1252.65	0.71	0.0003	1.36081e+06	HCD (High Energy Collision Dissociation)	MS2	14.7596	58.403	41.0201	14710	A001.raw	5/108		37	35	20	0.00278573	8.84734e+06	41.05
	FALSE	High	Mascot (A6)	[R].VSGVMTQGASR.[A]		1	1	P21956	P21956	0	2	1	0	1	1	546.775	1092.54	-3.52	-0.00192	110387	HCD (High Energy Collision Dissociation)	MS2	15.9359	80	19.4495	4514	A001.raw	7/96		37	34	19	0.00220897
	FALSE	High	Mascot (A6)	[R].WGPELAR.[L]		1	1	P21956	P21956	0	2	1	0	1	1	414.722	828.437	0.3	0.00012	973490	HCD (High Energy Collision Dissociation)	MS2	22.2781	55.878	33.8312	11202	A001.raw	6/48		29	28	13	0.00410319	1.47096e+06	33.81
FALSE	Master Protein	P17742	Peptidyl-prolyl cis-trans isomerase A OS=Mus musculus GN=Ppia PE=1 SV=2	26.8293	3	11	1	1	164	18	7.9	High		High	0	15.65	2	High	0	200	3
	Checked	Confidence	Identifying Node	Annotated Sequence	Modifications	# Protein Groups	# Proteins	Master Protein Accessions	Protein Accessions	# Missed Cleavages	Charge	DeltaScore	DeltaCn	Rank	Search Engine Rank	m/z [Da]	MH+ [Da]	DeltaM [ppm]	Deltam/z [Da]	Intensity	Activation Type	MS Order	Isolation Interference [%]	Ion Inject Time [ms]	RT [min]	First Scan	Spectrum File	Ions Matched	XCorr	Ions Score	Identity Strict	Identity Relaxed	Expectation Value	Area	Apex RT [min]
	FALSE	High	Sequest HT (A2)	[R].VSFELFADKVPK.[AT]		1	1	P17742	P17742	1	3	0.4628	0	1	1	460.59	1379.76	-0.15	-7e-05	862965	HCD (High Energy Collision Dissociation)	MS2	0	80	48.7523	18512	A001.raw	0/0	2.96
	FALSE	High	Sequest HT (A2)	[R].VSFELFADKVPK.[AT]		1	1	P17742	P17742	1	3	0.4386	0	1	1	460.591	1379.76	0.05	2e-05	1.28536e+06	HCD (High Energy Collision Dissociation)	MS2	4.56934	42.401	48.0355	18160	A001.raw	0/0	2.85					1.87556e+07	48.06
	FALSE	High	Sequest HT (A2)	[R].IIPGFMcQGGDFTR.[H]	C7(Carbamidomethyl)	1	1	P17742	P17742	0	2	0.7338	0	1	1	799.875	1598.74	-1.06	-0.00085	1.15522e+06	HCD (High Energy Collision Dissociation)	MS2	0	80	47.9726	18129	A001.raw	0/0	2.78
	FALSE	High	Sequest HT (A2)	[R].VSFELFADKVPK.[AT]		1	1	P17742	P17742	1	3	0.5055	0	1	1	460.59	1379.76	-1.08	-0.0005	1.68952e+06	HCD (High Energy Collision Dissociation)	MS2	0	45.38	48.3953	18336	A001.raw	0/0	2.71					1.25821e+07	48.3
	FALSE	High	Sequest HT (A2)	[R].IIPGFMcQGGDFTR.[H]	C7(Carbamidomethyl)	1	1	P17742	P17742	0	2	0.7043	0	1	1	799.875	1598.74	-1.29	-0.00103	734770	HCD (High Energy Collision Dissociation)	MS2	21.8538	80	48.3339	18306	A001.raw	0/0	2.3					4.96286e+06	48.3
	FALSE	High	Sequest HT (A2)	[R].IIPGFMcQGGDFTR.[H]	C7(Carbamidomethyl)	1	1	P17742	P17742	0	2	0.6359	0	1	1	799.876	1598.75	-0.07	-5e-05	1109543	HCD (High Energy Collision Dissociation)	MS2	36.9969	80	47.6214	17956	A001.raw	0/0	2.06					5.05705e+06	47.55
	FALSE	High	Mascot (A6)	[M].VNPTVFFDITADDEPLGR.[V]		1	1	P17742	P17742	0	2	1	0	1	1	1003.5	2005.99	1.44	0.00144	267487	HCD (High Energy Collision Dissociation)	MS2	0	80	61.3109	24710	A001.raw	12/200		101	36	21	1.38764e-09
	FALSE	High	Mascot (A6)	[R].IIPGFMcQGGDFTR.[H]	C7(Carbamidomethyl)	1	2	P17742	F8VPN3; P17742	0	2	1	0	1	1	799.875	1598.74	-1.06	-0.00085	1.15522e+06	HCD (High Energy Collision Dissociation)	MS2	0	80	47.9726	18129	A001.raw	11/128		43	37	22	0.0011615
	FALSE	High	Mascot (A6)	[R].VSFELFADKVPK.[AT]		1	3	P17742	V9GXC1; V9GX31; P17742	1	3	0.8293	0	1	1	460.59	1379.76	-1.08	-0.0005	1.68952e+06	HCD (High Energy Collision Dissociation)	MS2	0	45.38	48.3953	18336	A001.raw	9/100		41	33	18	0.000732852	1.25821e+07	48.3
	FALSE	High	Mascot (A6)	[R].IIPGFMcQGGDFTR.[H]	C7(Carbamidomethyl)	1	2	P17742	F8VPN3; P17742	0	2	1	0	1	1	799.875	1598.74	-1.29	-0.00103	734770	HCD (High Energy Collision Dissociation)	MS2	21.8538	80	48.3339	18306	A001.raw	9/128		40	37	22	0.00217046	4.96286e+06	48.3
	FALSE	High	Mascot (A6)	[R].VSFELFADKVPK.[AT]		1	3	P17742	V9GXC1; V9GX31; P17742	1	3	0.8108	0	1	1	460.59	1379.76	-0.15	-7e-05	862965	HCD (High Energy Collision Dissociation)	MS2	0	80	48.7523	18512	A001.raw	9/100		37	33	18	0.00163087
FALSE	Master Protein	P28798	Granulins OS=Mus musculus OX=10090 GN=Grn PE=1 SV=2	26.6553	10	33	0	1	589	63.4	6.8	High		High	0	49.91	6	High	0	718	10
	Checked	Confidence	Identifying Node	Annotated Sequence	Modifications	# Protein Groups	# Proteins	Master Protein Accessions	Protein Accessions	# Missed Cleavages	Charge	DeltaScore	DeltaCn	Rank	Search Engine Rank	m/z [Da]	MH+ [Da]	DeltaM [ppm]	Deltam/z [Da]	Intensity	Activation Type	MS Order	Isolation Interference [%]	Ion Inject Time [ms]	RT [min]	First Scan	Spectrum File	Ions Matched	XCorr	Ions Score	Identity Strict	Identity Relaxed	Expectation Value	Area	Apex RT [min]
	FALSE	High	Sequest HT (A2)	[K].AVccEDHIHccPAGFQcHTEK.[G]	C3(Carbamidomethyl); C4(Carbamidomethyl); C10(Carbamidomethyl); C11(Carbamidomethyl); C17(Carbamidomethyl)	1	1	P28798	P28798	0	4	0.7966	0	1	1	654.763	2616.03	-0.04	-2e-05	772711	HCD (High Energy Collision Dissociation)	MS2	2.49176	80	25.9841	7488	A001.raw	0/0	4.67					2.5429e+06	25.99
	FALSE	High	Sequest HT (A2)	[R].LNTGAWGccPFAK.[A]	C8(Carbamidomethyl); C9(Carbamidomethyl)	1	1	P28798	P28798	0	2	0.7074	0	1	1	741.336	1481.67	-0.49	-0.00036	2831522	HCD (High Energy Collision Dissociation)	MS2	4.73649	48.161	43.3222	15832	A001.raw	0/0	3.93					5.8682e+06	43.33
	FALSE	High	Sequest HT (A2)	[R].LNTGAWGccPFAK.[A]	C8(Carbamidomethyl); C9(Carbamidomethyl)	1	1	P28798	P28798	0	2	0.7003	0	1	1	741.336	1481.66	-1.14	-0.00085	5.33198e+06	HCD (High Energy Collision Dissociation)	MS2	0	25.562	42.9788	15668	A001.raw	0/0	3.87					2.03641e+07	42.93
	FALSE	High	Sequest HT (A2)	[K].GSWAccQLPHAVccEDR.[Q]	C5(Carbamidomethyl); C6(Carbamidomethyl); C13(Carbamidomethyl); C14(Carbamidomethyl)	1	1	P28798	P28798	0	3	0.7297	0	1	1	702.618	2105.84	-0.26	-0.00018	767517	HCD (High Energy Collision Dissociation)	MS2	26.4401	80	37.026	12747	A001.raw	0/0	3.7					4.6401e+06	36.95
	FALSE	High	Sequest HT (A2)	[K].GSWAccQLPHAVccEDR.[Q]	C5(Carbamidomethyl); C6(Carbamidomethyl); C13(Carbamidomethyl); C14(Carbamidomethyl)	1	1	P28798	P28798	0	2	0.8049	0	1	1	1053.42	2105.84	-0.11	-0.00011	228671	HCD (High Energy Collision Dissociation)	MS2	0	80	37.0161	12743	A001.raw	0/0	3.64
	FALSE	High	Sequest HT (A2)	[K].cDMEVScPEGYTccR.[L]	C1(Carbamidomethyl); C7(Carbamidomethyl); C13(Carbamidomethyl); C14(Carbamidomethyl)	1	1	P28798	P28798	0	2	0.9199	0	1	1	962.341	1923.68	-2.4	-0.00231	344161	HCD (High Energy Collision Dissociation)	MS2	22.8931	80	32.9591	10782	A001.raw	0/0	3.62					2.57856e+06	33.01
	FALSE	High	Sequest HT (A2)	[K].DSAGVWAccPYLK.[RG]	C8(Carbamidomethyl); C9(Carbamidomethyl)	1	1	P28798	P28798	0	2	0.6225	0	1	1	763.841	1526.67	-1.42	-0.00108	1.41566e+06	HCD (High Energy Collision Dissociation)	MS2	6.0431	80	44.921	16611	A001.raw	0/0	3.55					1.74625e+07	44.95
	FALSE	High	Sequest HT (A2)	[K].AVccEDHIHccPAGFQcHTEK.[G]	C3(Carbamidomethyl); C4(Carbamidomethyl); C10(Carbamidomethyl); C11(Carbamidomethyl); C17(Carbamidomethyl)	1	1	P28798	P28798	0	3	0.7713	0	1	1	872.68	2616.03	-1.53	-0.00133	360642	HCD (High Energy Collision Dissociation)	MS2	10.2671	80	26.0205	7505	A001.raw	0/0	3.41					1.45841e+06	25.97
	FALSE	High	Sequest HT (A2)	[K].DSAGVWAccPYLK.[RG]	C8(Carbamidomethyl); C9(Carbamidomethyl)	1	1	P28798	P28798	0	2	0.5411	0	1	1	763.843	1526.68	1.38	0.00106	954083	HCD (High Energy Collision Dissociation)	MS2	11.2388	80	45.2749	16788	A001.raw	0/0	3.16					2.43025e+06	45.3
	FALSE	High	Sequest HT (A2)	[R].TcEKDVDFIQPPVLLTLGPK.[V]	C2(Carbamidomethyl)	1	1	P28798	P28798	1	3	0.7436	0	1	1	757.41	2270.22	2.17	0.00164	202857	HCD (High Energy Collision Dissociation)	MS2	21.7381	80	58.4577	23313	A001.raw	0/0	3.12					6.17112e+06	58.54
	FALSE	High	Sequest HT (A2)	[R].LNTGAWGccPFAK.[A]	C8(Carbamidomethyl); C9(Carbamidomethyl)	1	1	P28798	P28798	0	2	0.7124	0	1	1	741.336	1481.67	-0.65	-0.00048	3654894	HCD (High Energy Collision Dissociation)	MS2	0	37.137	42.6299	15496	A001.raw	0/0	3.06					5.37646e+06	42.6
	FALSE	High	Sequest HT (A2)	[K].GSWAccQLPHAVccEDR.[Q]	C5(Carbamidomethyl); C6(Carbamidomethyl); C13(Carbamidomethyl); C14(Carbamidomethyl)	1	1	P28798	P28798	0	3	0.5872	0	1	1	702.618	2105.84	-0.69	-0.00049	740414	HCD (High Energy Collision Dissociation)	MS2	16.3387	80	37.3776	12920	A001.raw	0/0	2.98					5.29033e+06	37.37
	FALSE	High	Sequest HT (A2)	[K].DSAGVWAccPYLK.[RG]	C8(Carbamidomethyl); C9(Carbamidomethyl)	1	1	P28798	P28798	0	2	0.6703	0	1	1	763.842	1526.68	0.26	0.0002	435274	HCD (High Energy Collision Dissociation)	MS2	100	80	45.6371	16969	A001.raw	0/0	2.73					1.68999e+06	45.62
	FALSE	High	Sequest HT (A2)	[R].LNTGAWGccPFAK.[A]	C8(Carbamidomethyl); C9(Carbamidomethyl)	1	1	P28798	P28798	0	2	0.6555	0	1	1	741.337	1481.67	0.09	7e-05	441630	HCD (High Energy Collision Dissociation)	MS2	7.05858	80	42.2818	15324	A001.raw	0/0	2.38					1.10459e+06	42.27
	FALSE	High	Sequest HT (A2)	[K].DSAGVWAccPYLK.[RG]	C8(Carbamidomethyl); C9(Carbamidomethyl)	1	1	P28798	P28798	0	2	0.3923	0	1	1	763.842	1526.68	0.58	0.00045	336435	HCD (High Energy Collision Dissociation)	MS2	19.1906	80	44.5766	16439	A001.raw	0/0	2.09					3.19926e+06	44.58
	FALSE	High	Mascot (A6)	[K].GSWAccQLPHAVccEDR.[Q]	C5(Carbamidomethyl); C6(Carbamidomethyl); C13(Carbamidomethyl); C14(Carbamidomethyl)	1	4	P28798	H3BJ90; H3BJE0; P28798; Q3U9N4	0	2	1	0	1	1	1053.42	2105.84	-0.11	-0.00011	228671	HCD (High Energy Collision Dissociation)	MS2	0	80	37.0161	12743	A001.raw	11/168		81	36	21	1.59685e-07
	FALSE	High	Mascot (A6)	[R].LNTGAWGccPFAK.[A]	C8(Carbamidomethyl); C9(Carbamidomethyl)	1	2	P28798	P28798; Q3U9N4	0	2	1	0	1	1	741.336	1481.66	-1.14	-0.00085	5.33198e+06	HCD (High Energy Collision Dissociation)	MS2	0	25.562	42.9788	15668	A001.raw	11/140		75	37	21	5.84682e-07	2.03641e+07	42.93
	FALSE	High	Mascot (A6)	[R].LNTGAWGccPFAK.[A]	C8(Carbamidomethyl); C9(Carbamidomethyl)	1	2	P28798	P28798; Q3U9N4	0	2	1	0	1	1	741.336	1481.67	-0.49	-0.00036	2831522	HCD (High Energy Collision Dissociation)	MS2	4.73649	48.161	43.3222	15832	A001.raw	11/140		75	37	22	6.59087e-07	5.8682e+06	43.33
	FALSE	High	Mascot (A6)	[K].TQcPDDSTccELPTGK.[Y]	C3(Carbamidomethyl); C9(Carbamidomethyl); C10(Carbamidomethyl)	1	2	P28798	P28798; Q3U9N4	0	2	1	0	1	1	934.875	1868.74	-1.58	-0.00148	84527.1	HCD (High Energy Collision Dissociation)	MS2	25.2974	80	26.9501	7944	A001.raw	10/176		65	36	21	5.57324e-06	1.40919e+06	27.03
	FALSE	High	Mascot (A6)	[R].LNTGAWGccPFAK.[A]	C8(Carbamidomethyl); C9(Carbamidomethyl)	1	2	P28798	P28798; Q3U9N4	0	2	1	0	1	1	741.336	1481.67	-0.65	-0.00048	3654894	HCD (High Energy Collision Dissociation)	MS2	0	37.137	42.6299	15496	A001.raw	10/140		60	37	21	2.11232e-05	5.37646e+06	42.6
	FALSE	High	Mascot (A6)	[K].cDMEVScPEGYTccR.[L]	C1(Carbamidomethyl); C7(Carbamidomethyl); C13(Carbamidomethyl); C14(Carbamidomethyl)	1	2	P28798	P28798; Q3U9N4	0	2	1	0	1	1	962.341	1923.68	-2.4	-0.00231	344161	HCD (High Energy Collision Dissociation)	MS2	22.8931	80	32.9591	10782	A001.raw	13/112		59	33	18	1.22728e-05	2.57856e+06	33.01
	FALSE	High	Mascot (A6)	[K].AVccEDHIHccPAGFQcHTEK.[G]	C3(Carbamidomethyl); C4(Carbamidomethyl); C10(Carbamidomethyl); C11(Carbamidomethyl); C17(Carbamidomethyl)	1	2	P28798	P28798; Q3U9N4	0	3	1	0	1	1	872.68	2616.03	-1.53	-0.00133	360642	HCD (High Energy Collision Dissociation)	MS2	10.2671	80	26.0205	7505	A001.raw	10/180		58	37	21	2.91001e-05	1.45841e+06	25.97
	FALSE	High	Mascot (A6)	[K].DSAGVWAccPYLK.[RG]	C8(Carbamidomethyl); C9(Carbamidomethyl)	1	4	P28798	H3BJ90; H3BJE0; P28798; Q3U9N4	0	2	1	0	1	1	763.843	1526.68	1.38	0.00106	954083	HCD (High Energy Collision Dissociation)	MS2	11.2388	80	45.2749	16788	A001.raw	7/96		55	36	21	5.6187e-05	2.43025e+06	45.3
	FALSE	High	Mascot (A6)	[R].VHccPHGAScDLVHTR.[C]	C3(Carbamidomethyl); C4(Carbamidomethyl); C10(Carbamidomethyl)	1	3	P28798	P28798; H3BLC9; Q3U9N4	0	4	1	0	1	1	477.212	1905.83	-0.11	-5e-05	543632	HCD (High Energy Collision Dissociation)	MS2	6.50269	80	21.1807	5253	A001.raw	9/120		50	37	22	0.000204657
	FALSE	High	Mascot (A6)	[R].LNTGAWGccPFAK.[A]	C8(Carbamidomethyl); C9(Carbamidomethyl)	1	2	P28798	P28798; Q3U9N4	0	2	1	0	1	1	741.337	1481.67	0.09	7e-05	441630	HCD (High Energy Collision Dissociation)	MS2	7.05858	80	42.2818	15324	A001.raw	11/140		49	36	21	0.000215652	1.10459e+06	42.27
	FALSE	High	Mascot (A6)	[R].AVSLPFSVVcPDAK.[T]	C10(Carbamidomethyl)	1	3	P28798	P28798; H3BLC9; Q3U9N4	0	2	1	0	1	1	745.39	1489.77	0.88	0.00066	695050	HCD (High Energy Collision Dissociation)	MS2	18.9141	80	50.8099	19522	A001.raw	7/104		45	36	21	0.000535537	3.70188e+06	50.73
	FALSE	High	Mascot (A6)	[K].DSAGVWAccPYLK.[RG]	C8(Carbamidomethyl); C9(Carbamidomethyl)	1	4	P28798	H3BJ90; H3BJE0; P28798; Q3U9N4	0	2	1	0	1	1	763.841	1526.67	-1.42	-0.00108	1.41566e+06	HCD (High Energy Collision Dissociation)	MS2	6.0431	80	44.921	16611	A001.raw	6/96		41	36	21	0.00162419	1.74625e+07	44.95
	FALSE	High	Mascot (A6)	[R].VHccPHGAScDLVHTR.[C]	C3(Carbamidomethyl); C4(Carbamidomethyl); C10(Carbamidomethyl)	1	3	P28798	P28798; H3BLC9; Q3U9N4	0	4	1	0	1	1	477.212	1905.83	0.79	0.00038	454397	HCD (High Energy Collision Dissociation)	MS2	13.7853	80	21.5189	5404	A001.raw	9/120		40	37	22	0.00228276	851476	21.48
	FALSE	High	Mascot (A6)	[K].DSAGVWAccPYLK.[RG]	C8(Carbamidomethyl); C9(Carbamidomethyl)	1	4	P28798	H3BJ90; H3BJE0; P28798; Q3U9N4	0	2	1	0	1	1	763.842	1526.68	0.58	0.00045	336435	HCD (High Energy Collision Dissociation)	MS2	19.1906	80	44.5766	16439	A001.raw	6/96		39	37	21	0.00231285	3.19926e+06	44.58
	FALSE	High	Mascot (A6)	[R].TcEKDVDFIQPPVLLTLGPK.[V]	C2(Carbamidomethyl)	1	4	P28798	H3BJ90; H3BJE0; P28798; Q3U9N4	1	3	1	0	1	1	757.41	2270.22	2.17	0.00164	202857	HCD (High Energy Collision Dissociation)	MS2	21.7381	80	58.4577	23313	A001.raw	16/216		39	33	18	0.00109652	6.17112e+06	58.54
	FALSE	High	Mascot (A6)	[R].VHccPHGAScDLVHTR.[C]	C3(Carbamidomethyl); C4(Carbamidomethyl); C10(Carbamidomethyl)	1	3	P28798	P28798; H3BLC9; Q3U9N4	0	4	1	0	1	1	477.212	1905.83	0.79	0.00038	838378	HCD (High Energy Collision Dissociation)	MS2	1.42349	80	20.8435	5107	A001.raw	9/120		39	37	22	0.00289374	2.23727e+06	20.81
	FALSE	High	Mascot (A6)	[R].HccPGGFHcSAR.[G]	C2(Carbamidomethyl); C3(Carbamidomethyl); C9(Carbamidomethyl)	1	3	P28798	H3BJE0; P28798; Q3U9N4	0	3	1	0	1	1	482.526	1445.56	0.52	0.00025	100715	HCD (High Energy Collision Dissociation)	MS2	14.7814	80	15.3458	3091	A001.raw	4/88		36	33	18	0.00216891	425699	15.35
	FALSE	High	Mascot (A6)	[R].HccPGGFHcSAR.[G]	C2(Carbamidomethyl); C3(Carbamidomethyl); C9(Carbamidomethyl)	1	3	P28798	H3BJE0; P28798; Q3U9N4	0	3	1	0	1	1	482.526	1445.56	0.64	0.00031	132325	HCD (High Energy Collision Dissociation)	MS2	34.8087	80	17.0871	3628	A001.raw	6/88		35	33	18	0.00318998	282398	17.08
FALSE	Master Protein	P14824	Annexin A6 OS=Mus musculus OX=10090 GN=Anxa6 PE=1 SV=3	25.7058	12	41	0	1	673	75.8	5.5	High		High	0	64.32	11	High	0	883	11
	Checked	Confidence	Identifying Node	Annotated Sequence	Modifications	# Protein Groups	# Proteins	Master Protein Accessions	Protein Accessions	# Missed Cleavages	Charge	DeltaScore	DeltaCn	Rank	Search Engine Rank	m/z [Da]	MH+ [Da]	DeltaM [ppm]	Deltam/z [Da]	Intensity	Activation Type	MS Order	Isolation Interference [%]	Ion Inject Time [ms]	RT [min]	First Scan	Spectrum File	Ions Matched	XCorr	Ions Score	Identity Strict	Identity Relaxed	Expectation Value	Area	Apex RT [min]
	FALSE	High	Sequest HT (A2)	[R].GSVHDFPEFDANQDAEALYTAMK.[G]		1	1	P14824	P14824	0	3	0.8088	0	1	1	852.717	2556.14	0.93	0.00079	530282	HCD (High Energy Collision Dissociation)	MS2	13.9195	80	55.5328	21858	A001.raw	0/0	5.23					4.58272e+06	55.55
	FALSE	High	Sequest HT (A2)	[K].WGTDEAQFIYILGNR.[S]		1	1	P14824	P14824	0	2	0.8321	0	1	1	891.942	1782.88	-2.91	-0.00259	422940	HCD (High Energy Collision Dissociation)	MS2	0	80	60.8368	24479	A001.raw	0/0	4.17					6.66592e+06	60.9
	FALSE	High	Sequest HT (A2)	[K].GFGSDKESILELITSR.[S]		1	1	P14824	P14824	1	3	0.7297	0	1	1	584.645	1751.92	1.04	0.00061	1.64273e+06	HCD (High Energy Collision Dissociation)	MS2	24.2576	80	58.248	23210	A001.raw	0/0	3.81					1.33349e+07	58.3
	FALSE	High	Sequest HT (A2)	[K].GFGSDKESILELITSR.[S]		1	1	P14824	P14824	1	3	0.7184	0	1	1	584.644	1751.92	0.62	0.00036	1.57523e+06	HCD (High Energy Collision Dissociation)	MS2	10.6671	61.321	57.8963	23036	A001.raw	0/0	3.8					1.99293e+07	57.82
	FALSE	High	Sequest HT (A2)	[K].GIGTDEATIIDIVTHR.[S]		1	1	P14824	P14824	0	3	0.7958	0	1	1	570.972	1710.9	-0.4	-0.00023	2.11184e+06	HCD (High Energy Collision Dissociation)	MS2	8.03933	60.401	57.6904	22934	A001.raw	0/0	3.77					1.47884e+07	57.72
	FALSE	High	Sequest HT (A2)	[R].DLMADLKSEISGDLAR.[L]		1	1	P14824	P14824	1	2	0.7333	0	1	1	867.443	1733.88	2.32	0.00201	349278	HCD (High Energy Collision Dissociation)	MS2	0	80	61.632	24866	A001.raw	0/0	3.6
	FALSE	High	Sequest HT (A2)	[K].GIGTDEATIIDIVTHR.[S]		1	1	P14824	P14824	0	3	0.8062	0	1	1	570.972	1710.9	-0.29	-0.00017	2.66695e+06	HCD (High Energy Collision Dissociation)	MS2	6.8057	46.304	57.3328	22758	A001.raw	0/0	3.56					7.52844e+06	57.23
	FALSE	High	Sequest HT (A2)	[R].LILGLMMPPAHYDAK.[Q]		1	1	P14824	P14824	0	2	0.6276	0	1	1	835.443	1669.88	-1.03	-0.00086	607121	HCD (High Energy Collision Dissociation)	MS2	53.0677	80	53.6196	20907	A001.raw	0/0	3.41					2.39961e+06	53.54
	FALSE	High	Sequest HT (A2)	[K].DLIEDLKYELTGKFER.[L]		1	1	P14824	P14824	2	3	0.5463	0	1	1	657.015	1969.03	0.96	0.00063	43945.3	HCD (High Energy Collision Dissociation)	MS2	27.356	80	63.5378	25786	A001.raw	0/0	3.35					2.15144e+06	63.57
	FALSE	High	Sequest HT (A2)	[K].SLEDALSSDTSGHFR.[R]		1	1	P14824	P14824	0	2	0.6577	0	1	1	811.378	1621.75	2.05	0.00166	570248	HCD (High Energy Collision Dissociation)	MS2	0	80	39.8528	14138	A001.raw	0/0	3.33					3.11005e+06	39.78
	FALSE	High	Sequest HT (A2)	[K].DLIEDLKYELTGKFER.[L]		1	1	P14824	P14824	2	3	0.712	0	1	1	657.014	1969.03	-0.62	-0.00041	222601	HCD (High Energy Collision Dissociation)	MS2	0	80	63.9034	25963	A001.raw	0/0	3.09					2.8028e+06	63.92
	FALSE	High	Sequest HT (A2)	[K].SLEDALSSDTSGHFR.[R]		1	1	P14824	P14824	0	2	0.6974	0	1	1	811.374	1621.74	-2.46	-0.002	368410	HCD (High Energy Collision Dissociation)	MS2	0	80	39.4982	13962	A001.raw	0/0	3.04					1.99644e+06	39.54
	FALSE	High	Sequest HT (A2)	[K].GIGTDEATIIDIVTHR.[S]		1	1	P14824	P14824	0	3	0.8042	0	1	1	570.972	1710.9	0.13	8e-05	1.06745e+06	HCD (High Energy Collision Dissociation)	MS2	12.8826	80	58.0484	23111	A001.raw	0/0	2.86					8.1934e+06	58.12
	FALSE	High	Sequest HT (A2)	[K].SLHQAIEGDTSGDFMK.[A]		1	1	P14824	P14824	0	2	0.7029	0	1	1	868.402	1735.8	0.85	0.00073	222634	HCD (High Energy Collision Dissociation)	MS2	0	80	36.336	12416	A001.raw	0/0	2.76					1.33647e+06	36.32
	FALSE	High	Sequest HT (A2)	[K].SLEDALSSDTSGHFR.[R]		1	1	P14824	P14824	0	3	0.7059	0	1	1	541.253	1621.75	0.16	9e-05	651609	HCD (High Energy Collision Dissociation)	MS2	44.3046	80	39.7053	14064	A001.raw	0/0	2.72
	FALSE	High	Sequest HT (A2)	[K].TLIEILATR.[T]		1	1	P14824	P14824	0	2	0.3936	0	1	1	515.32	1029.63	1.68	0.00087	4.52436e+06	HCD (High Energy Collision Dissociation)	MS2	4.00953	22.738	50.6308	19432	A001.raw	0/0	2.49					13412042	50.61
	FALSE	High	Sequest HT (A2)	[K].TLIEILATR.[T]		1	1	P14824	P14824	0	2	0.4065	0	1	1	515.318	1029.63	-0.57	-0.00029	1.26651e+06	HCD (High Energy Collision Dissociation)	MS2	6.61049	80	50.9848	19607	A001.raw	0/0	2.46					3.92465e+06	51.01
	FALSE	High	Sequest HT (A2)	[K].TLIEILATR.[T]		1	1	P14824	P14824	0	2	0.4244	0	1	1	515.319	1029.63	-0.21	-0.00011	442724	HCD (High Energy Collision Dissociation)	MS2	23.8688	80	51.3567	19792	A001.raw	0/0	2.38					6.73715e+06	51.21
	FALSE	High	Sequest HT (A2)	[K].cLIEILASR.[T]	C1(Carbamidomethyl)	1	1	P14824	P14824	0	2	0.3973	0	1	1	537.802	1074.6	-0.92	-0.00049	868691	HCD (High Energy Collision Dissociation)	MS2	40.2298	80	49.5314	18895	A001.raw	0/0	2.24					3.49375e+06	49.5
	FALSE	High	Sequest HT (A2)	[K].TLIEILATR.[T]		1	1	P14824	P14824	0	2	0.4395	0	1	1	515.32	1029.63	1.92	0.00099	2.82749e+06	HCD (High Energy Collision Dissociation)	MS2	0	52.656	50.2793	19259	A001.raw	0/0	2.23					1.28045e+07	50.24
	FALSE	High	Mascot (A6)	[K].WGTDEAQFIYILGNR.[S]		1	2	P14824	P14824; F8WIT2	0	2	1	0	1	1	891.942	1782.88	-2.91	-0.00259	422940	HCD (High Energy Collision Dissociation)	MS2	0	80	60.8368	24479	A001.raw	11/144		107	37	22	4.4135e-10	6.66592e+06	60.9
	FALSE	High	Mascot (A6)	[R].GSVHDFPEFDANQDAEALYTAMK.[G]		1	2	P14824	P14824; F8WIT2	0	3	1	0	1	1	852.717	2556.14	0.93	0.00079	530282	HCD (High Energy Collision Dissociation)	MS2	13.9195	80	55.5328	21858	A001.raw	19/220		85	39	24	1.14324e-07	4.58272e+06	55.55
	FALSE	High	Mascot (A6)	[K].GIGTDEATIIDIVTHR.[S]		1	2	P14824	P14824; F8WIT2	0	3	0.9759	0	1	1	570.972	1710.9	-0.29	-0.00017	2.66695e+06	HCD (High Energy Collision Dissociation)	MS2	6.8057	46.304	57.3328	22758	A001.raw	9/120		83	35	20	7.16316e-08	7.52844e+06	57.23
	FALSE	High	Mascot (A6)	[K].GIGTDEATIIDIVTHR.[S]		1	2	P14824	P14824; F8WIT2	0	3	0.9872	0	1	1	570.972	1710.9	-0.4	-0.00023	2.11184e+06	HCD (High Energy Collision Dissociation)	MS2	8.03933	60.401	57.6904	22934	A001.raw	9/120		78	35	20	2.05639e-07	1.47884e+07	57.72
	FALSE	High	Mascot (A6)	[K].SLEDALSSDTSGHFR.[R]		1	2	P14824	P14824; F8WIT2	0	2	1	0	1	1	811.378	1621.75	2.05	0.00166	570248	HCD (High Energy Collision Dissociation)	MS2	0	80	39.8528	14138	A001.raw	9/112		72	36	21	1.31966e-06	3.11005e+06	39.78
	FALSE	High	Mascot (A6)	[R].DLMADLKSEISGDLAR.[L]		1	2	P14824	P14824; F8WIT2	1	2	1	0	1	1	867.443	1733.88	2.32	0.00201	349278	HCD (High Energy Collision Dissociation)	MS2	0	80	61.632	24866	A001.raw	12/156		71	37	22	1.66134e-06
	FALSE	High	Mascot (A6)	[K].GIGTDEATIIDIVTHR.[S]		1	2	P14824	P14824; F8WIT2	0	3	0.9714	0	1	1	570.972	1710.9	0.13	8e-05	1.06745e+06	HCD (High Energy Collision Dissociation)	MS2	12.8826	80	58.0484	23111	A001.raw	8/120		70	35	20	1.43649e-06	8.1934e+06	58.12
	FALSE	High	Mascot (A6)	[K].SLEDALSSDTSGHFR.[R]		1	2	P14824	P14824; F8WIT2	0	2	1	0	1	1	811.374	1621.74	-2.46	-0.002	368410	HCD (High Energy Collision Dissociation)	MS2	0	80	39.4982	13962	A001.raw	8/112		62	36	21	1.05604e-05	1.99644e+06	39.54
	FALSE	High	Mascot (A6)	[K].TLIEILATR.[T]		1	2	P14824	P14824; F8WIT2	0	2	0.5741	0	1	1	515.32	1029.63	1.68	0.00087	4.52436e+06	HCD (High Energy Collision Dissociation)	MS2	4.00953	22.738	50.6308	19432	A001.raw	8/64		54	31	15	1.80138e-05	13412042	50.61
	FALSE	High	Mascot (A6)	[K].GFGSDKESILELITSR.[S]		1	2	P14824	P14824; F8WIT2	1	3	0.8519	0	1	1	584.645	1751.92	1.04	0.00061	1.64273e+06	HCD (High Energy Collision Dissociation)	MS2	24.2576	80	58.248	23210	A001.raw	8/160		54	35	20	5.28284e-05	1.33349e+07	58.3
	FALSE	High	Mascot (A6)	[K].GFGSDKESILELITSR.[S]		1	2	P14824	P14824; F8WIT2	1	3	0.7925	0	1	1	584.644	1751.92	0.62	0.00036	1.57523e+06	HCD (High Energy Collision Dissociation)	MS2	10.6671	61.321	57.8963	23036	A001.raw	8/160		53	35	20	7.08494e-05	1.99293e+07	57.82
	FALSE	High	Mascot (A6)	[R].LILGLMMPPAHYDAK.[Q]		1	2	P14824	P14824; F8WIT2	0	2	1	0	1	1	835.443	1669.88	-1.03	-0.00086	607121	HCD (High Energy Collision Dissociation)	MS2	53.0677	80	53.6196	20907	A001.raw	12/112		49	36	20	0.00017486	2.39961e+06	53.54
	FALSE	High	Mascot (A6)	[K].TLIEILATR.[T]		1	2	P14824	P14824; F8WIT2	0	2	0.6512	0	1	1	515.32	1029.63	1.92	0.00099	2.82749e+06	HCD (High Energy Collision Dissociation)	MS2	0	52.656	50.2793	19259	A001.raw	7/64		43	31	15	0.000252119	1.28045e+07	50.24
	FALSE	High	Mascot (A6)	[R].DLMADLKSEISGDLAR.[L]		1	2	P14824	P14824; F8WIT2	1	3	1	0	1	1	578.63	1733.87	0.52	0.0003	300996	HCD (High Energy Collision Dissociation)	MS2	0	80	61.4055	24756	A001.raw	13/156		43	37	22	0.00117592	1.65339e+06	61.4
	FALSE	High	Mascot (A6)	[K].TLIEILATR.[T]		1	2	P14824	P14824; F8WIT2	0	2	0.6341	0	1	1	515.318	1029.63	-0.57	-0.00029	1.26651e+06	HCD (High Energy Collision Dissociation)	MS2	6.61049	80	50.9848	19607	A001.raw	7/64		41	30	15	0.000387662	3.92465e+06	51.01
	FALSE	High	Mascot (A6)	[K].TLIEILATR.[T]		1	2	P14824	P14824; F8WIT2	0	2	0.85	0	1	1	515.319	1029.63	-0.21	-0.00011	442724	HCD (High Energy Collision Dissociation)	MS2	23.8688	80	51.3567	19792	A001.raw	5/64		40	31	15	0.000507698	6.73715e+06	51.21
	FALSE	High	Mascot (A6)	[K].TLIEILATR.[T]		1	2	P14824	P14824; F8WIT2	0	2	0.8158	0	1	1	515.321	1029.63	3.82	0.00197	634595	HCD (High Energy Collision Dissociation)	MS2	10.4566	80	49.9328	19093	A001.raw	5/64		38	30	15	0.000697251	3.76355e+06	49.93
	FALSE	High	Mascot (A6)	[K].cLIEILASR.[T]	C1(Carbamidomethyl)	1	2	P14824	P14824; F8WIT2	0	2	0.7568	0	1	1	537.802	1074.6	-0.92	-0.00049	868691	HCD (High Energy Collision Dissociation)	MS2	40.2298	80	49.5314	18895	A001.raw	7/64		37	34	19	0.0024429	3.49375e+06	49.5
	FALSE	High	Mascot (A6)	[K].DLIEDLKYELTGKFER.[L]		1	2	P14824	P14824; F8WIT2	2	3	1	0	1	1	657.015	1969.03	0.96	0.00063	43945.3	HCD (High Energy Collision Dissociation)	MS2	27.356	80	63.5378	25786	A001.raw	14/156		36	36	21	0.00368774	2.15144e+06	63.57
	FALSE	High	Mascot (A6)	[K].LMLAVVK.[C]		1	2	P14824	P14824; F8WIT2	0	2	1	0	1	1	387.251	773.495	0.07	3e-05	1.41228e+06	HCD (High Energy Collision Dissociation)	MS2	42.154	37.784	37.9571	13202	A001.raw	6/48		34	27	13	0.000840918	4.60161e+06	37.97
	FALSE	High	Mascot (A6)	[K].LMLAVVK.[C]		1	2	P14824	P14824; F8WIT2	0	2	1	0	1	1	387.251	773.495	-0.49	-0.00019	507176	HCD (High Energy Collision Dissociation)	MS2	66.0222	74.011	37.6145	13038	A001.raw	6/48		33	21	13	0.000285859	707189	37.61
FALSE	Master Protein	Q60605	Myosin light polypeptide 6 OS=Mus musculus OX=10090 GN=Myl6 PE=1 SV=3	24.5033	3	9	2	1	151	16.9	4.65	High		High	0	11.6	3	High	0	200	2
	Checked	Confidence	Identifying Node	Annotated Sequence	Modifications	# Protein Groups	# Proteins	Master Protein Accessions	Protein Accessions	# Missed Cleavages	Charge	DeltaScore	DeltaCn	Rank	Search Engine Rank	m/z [Da]	MH+ [Da]	DeltaM [ppm]	Deltam/z [Da]	Intensity	Activation Type	MS Order	Isolation Interference [%]	Ion Inject Time [ms]	RT [min]	First Scan	Spectrum File	Ions Matched	XCorr	Ions Score	Identity Strict	Identity Relaxed	Expectation Value	Area	Apex RT [min]
	FALSE	High	Sequest HT (A2)	[K].VLDFEHFLPMLQTVAK.[N]		1	1	Q60605	Q60605	0	2	0.6944	0	1	1	944.504	1888	-1.75	-0.00165	159299	HCD (High Energy Collision Dissociation)	MS2	0	80	67.0538	27478	A001.raw	0/0	3.6					3.15103e+06	67.09
	FALSE	High	Sequest HT (A2)	[R].ALGQNPTNAEVLK.[V]		1	2	Q60605	Q8CI43; Q60605	0	2	0.7567	0	1	1	677.87	1354.73	-0.3	-0.0002	626721	HCD (High Energy Collision Dissociation)	MS2	0	80	31.4497	10072	A001.raw	0/0	3					2.50145e+06	31.48
	FALSE	High	Sequest HT (A2)	[R].ALGQNPTNAEVLK.[V]		1	2	Q60605	Q8CI43; Q60605	0	2	0.7331	0	1	1	677.87	1354.73	0.15	0.0001	673523	HCD (High Energy Collision Dissociation)	MS2	0	80	31.0586	9889	A001.raw	0/0	2.96
	FALSE	High	Sequest HT (A2)	[K].EAFQLFDR.[T]		1	1	Q60605	Q60605	0	2	0.5854	0	1	1	513.257	1025.51	2.48	0.00127	1.26415e+06	HCD (High Energy Collision Dissociation)	MS2	51.8382	80	45.0558	16676	A001.raw	0/0	2.05					7371362	45.06
	FALSE	High	Mascot (A6)	[R].ALGQNPTNAEVLK.[V]		1	2	Q60605	Q8CI43; Q60605	0	2	1	0	1	1	677.87	1354.73	0.15	0.0001	673523	HCD (High Energy Collision Dissociation)	MS2	0	80	31.0586	9889	A001.raw	10/132		63	34	19	5.67022e-06
	FALSE	High	Mascot (A6)	[R].ALGQNPTNAEVLK.[V]		1	2	Q60605	Q8CI43; Q60605	0	2	1	0	1	1	677.87	1354.73	-0.3	-0.0002	626721	HCD (High Energy Collision Dissociation)	MS2	0	80	31.4497	10072	A001.raw	10/132		56	34	19	2.41565e-05	2.50145e+06	31.48
	FALSE	High	Mascot (A6)	[K].VLDFEHFLPMLQTVAK.[N]		1	1	Q60605	Q60605	0	3	1	0	1	1	630.005	1888	-1.34	-0.00084	99438.9	HCD (High Energy Collision Dissociation)	MS2	8.8563	80	66.9251	27417	A001.raw	9/136		51	35	20	0.000100217	6.18577e+06	66.96
	FALSE	High	Mascot (A6)	[K].VLDFEHFLPMLQTVAK.[N]		1	1	Q60605	Q60605	0	2	1	0	1	1	944.504	1888	-1.75	-0.00165	159299	HCD (High Energy Collision Dissociation)	MS2	0	80	67.0538	27478	A001.raw	20/136		43	35	20	0.000659311	3.15103e+06	67.09
	FALSE	High	Mascot (A6)	[K].VLDFEHFLPMLQTVAK.[N]		1	1	Q60605	Q60605	0	3	1	0	1	1	630.006	1888	-0.08	-5e-05	203815	HCD (High Energy Collision Dissociation)	MS2	12.4904	80	67.2893	27591	A001.raw	8/136		39	35	20	0.00157837	733746	67.16
FALSE	Master Protein	P68368	Tubulin alpha-4A chain OS=Mus musculus OX=10090 GN=Tuba4a PE=1 SV=1	23.8839	7	30	0	1	448	49.9	5.06	High		High	0	43.47	7	High	0	613	7
	Checked	Confidence	Identifying Node	Annotated Sequence	Modifications	# Protein Groups	# Proteins	Master Protein Accessions	Protein Accessions	# Missed Cleavages	Charge	DeltaScore	DeltaCn	Rank	Search Engine Rank	m/z [Da]	MH+ [Da]	DeltaM [ppm]	Deltam/z [Da]	Intensity	Activation Type	MS Order	Isolation Interference [%]	Ion Inject Time [ms]	RT [min]	First Scan	Spectrum File	Ions Matched	XCorr	Ions Score	Identity Strict	Identity Relaxed	Expectation Value	Area	Apex RT [min]
	FALSE	High	Sequest HT (A2)	[R].IHFPLATYAPVISAEK.[A]		2	5	P05213; P68368	P05214; P68369; P05213; P68373; P68368	0	3	0.774	0	1	1	586.327	1756.97	1.04	0.00061	1.18783e+06	HCD (High Energy Collision Dissociation)	MS2	7.70673	80	52.138	20178	A001.raw	0/0	4.07					1.67201e+07	52.19
	FALSE	High	Sequest HT (A2)	[R].IHFPLATYAPVISAEK.[A]		2	5	P05213; P68368	P05214; P68369; P05213; P68373; P68368	0	3	0.769	0	1	1	586.326	1756.96	-0.31	-0.00018	990351	HCD (High Energy Collision Dissociation)	MS2	3.2537	80	52.4821	20345	A001.raw	0/0	3.81					8.33338e+06	52.41
	FALSE	High	Sequest HT (A2)	[R].IHFPLATYAPVISAEK.[A]		2	5	P05213; P68368	P05214; P68369; P05213; P68373; P68368	0	3	0.7895	0	1	1	586.325	1756.96	-0.84	-0.00049	418863	HCD (High Energy Collision Dissociation)	MS2	30.4308	80	51.7882	20006	A001.raw	0/0	3.42					3.0899e+06	51.82
	FALSE	High	Sequest HT (A2)	[R].AVFVDLEPTVIDEIR.[N]		1	1	P68368	P68368	0	2	0.6424	0	1	1	858.463	1715.92	-1.21	-0.00103	1.11569e+06	HCD (High Energy Collision Dissociation)	MS2	0	80	59.8066	23973	A001.raw	0/0	3.3					8.49402e+06	59.82
	FALSE	High	Sequest HT (A2)	[K].VGINYQPPTVVPGGDLAK.[V]		2	6	P05213; P68368	P05214; Q9JJZ2; P68369; P05213; P68373; P68368	0	2	0.7391	0	1	1	912.995	1824.98	-1.55	-0.00142	1058591	HCD (High Energy Collision Dissociation)	MS2	0	80	45.6065	16953	A001.raw	0/0	2.99					1.36887e+07	45.55
	FALSE	High	Sequest HT (A2)	[R].SIQFVDWcPTGFK.[V]	C8(Carbamidomethyl)	2	2	P05213; P68368	P05213; P68368	0	2	0.8035	0	1	1	792.879	1584.75	-1.09	-0.00086	1.19412e+06	HCD (High Energy Collision Dissociation)	MS2	19.1796	80	55.8169	22001	A001.raw	0/0	2.85					5.54084e+06	55.68
	FALSE	High	Sequest HT (A2)	[R].AVcMLSNTTAIAEAWAR.[L]	C3(Carbamidomethyl)	2	6	P05213; P68368	P05214; Q9JJZ2; P68369; P05213; P68373; P68368	0	2	0.7168	0	1	1	932.955	1864.9	-1.15	-0.00107	468994	HCD (High Energy Collision Dissociation)	MS2	0	80	56.6377	22413	A001.raw	0/0	2.79
	FALSE	High	Sequest HT (A2)	[R].LISQIVSSITASLR.[F]		2	4	P05213; P68368	Q9JJZ2; P05213; P68373; P68368	0	2	0.7491	0	1	1	744.443	1487.88	-0.31	-0.00023	645339	HCD (High Energy Collision Dissociation)	MS2	3.33251	80	66.8257	27369	A001.raw	0/0	2.79					1.21115e+07	66.92
	FALSE	High	Sequest HT (A2)	[R].LISQIVSSITASLR.[F]		2	4	P05213; P68368	Q9JJZ2; P05213; P68373; P68368	0	2	0.7823	0	1	1	744.445	1487.88	2.4	0.00178	148982	HCD (High Energy Collision Dissociation)	MS2	14.2478	80	67.1938	27545	A001.raw	0/0	2.71					420975	67.18
	FALSE	High	Sequest HT (A2)	[R].NLDIERPTYTNLNR.[L]		2	6	P05213; P68368	P05214; Q9JJZ2; P68369; P05213; P68373; P68368	0	3	0.5821	0	1	1	573.633	1718.88	0.55	0.00032	1.05196e+06	HCD (High Energy Collision Dissociation)	MS2	2.77483	80	37.1447	12804	A001.raw	0/0	2.68					4.97884e+06	37.21
[truncated: 2,927 more rows]

## Sheet: Untreated 002
Checked	Master	Accession	Description	Coverage	# Peptides	# PSMs	# Protein Unique Peptides	# Protein Groups	# AAs	MW [kDa]	calc. pI	Found in Sample: [S13] F13: Sample	Modifications	Protein FDR Confidence Sequest HT	Exp. q-value Sequest HT	Score Sequest HT	# Peptides Sequest HT	Protein FDR Confidence Mascot	Exp. q-value Mascot	Score Mascot	# Peptides Mascot
[truncated: 6,829 more rows]

[truncated: 22 more sheets: Untreated 003, Untreated 004, LPS 001, LPS 002, LPS 003, LPS 004, NH2-PS NPs 001, NH2-PS NPs 002, NH2-PS NPs 003, NH2-PS NPs 004, COOH-PS NPs 001, COOH-PS NPs 002, COOH-PS NPs 003, COOH-PS NPs 004, SiO2 NPs 001, SiO2 NPs 002, SiO2 NPs 003, SiO2 NPs 004, Medium 001, Medium 002 …]
