# Supplementary material for: Macrophages Release Extracellular Vesicles of Different Properties and Composition Following Exposure to Nanoparticles
Source: Int J Mol Sci. 2022 Dec 23;24(1):260. doi: 10.3390/ijms24010260 (PMC9820242; doi:10.3390/ijms24010260)
Supplement: Supplementary file 1 [file ijms-24-00260-s001.zip › Deville et al Table S4.xlsx]

## Sheet: Fold changes
entity	abbreviation	name	LPS vs control		NH2 vs control		COOH vs control		SiO2 vs control
			Log FC	Adj p-value	Log FC	Adj p-value	Log FC	Adj p-value	Log FC	Adj p-value
16480	Jup	junction plakoglobin	-0.729299	1e-06	-0.346167	0.00519916	0.732654	0.00763939	-0.0271862	0.442347
19156	Psap	prosaposin	-0.709873	1e-06	-0.658973	1e-06	0.0567365	0.874369	0.536193	0.298788
246707	Emilin2	elastin microfibril interfacer 2	-1.27486	1e-06	-0.713641	1e-06	-0.144324	0.2233	-0.0664675	0.998541
12266	C3	complement C3	-0.364506	1e-06	-1.8502	1e-06	-0.378095	1e-06	-0.135091	0.14878
17304	Mfge8	milk fat globule-EGF factor 8 protein	-1.4608	1e-06	-0.833756	2.08e-06	-0.404677	0.0267751	0.0356527	0.58054
11487	Adam10	ADAM metallopeptidase domain 10	-0.698872	1e-06			-0.452669	0.0780624
18636	Cfp	complement factor properdin	-1.33852	1e-06	-2.68199	1e-06	-0.528419	0.0793655	0.0878366	0.553632
16425	Itih2	inter-alpha-trypsin inhibitor heavy chain 2	-0.715487	1e-06	-0.331749	0.00133603	-0.719545	0.000301083	-0.105137	0.676974
18571	Pdcd6ip	programmed cell death 6 interacting protein	-0.671286	1e-06	-0.220368	0.00194579	-0.744136	1e-06	-0.519155	1e-06
11744	Anxa11	annexin A11	0.59655	1.1e-06	0.0310537	0.834868	-0.711536	0.000393485	-0.188129	0.109126
13030	Ctsb	cathepsin B	-0.42672	2.64e-06	-0.84751	0.000145917	-0.138522	0.450038	0.0495224	0.934566
18826	Lcp1	lymphocyte cytosolic protein 1	0.617749	3.43e-06	0.693362	1e-06	-0.379239	0.0397865	0.178474	0.290442
19039	Lgals3bp	galectin 3 binding protein	0.391429	6.04e-06	0.530474	1e-06	-0.321119	0.000132888	0.113907	0.461708
109620	Dsp	desmoplakin	-0.784429	7.53e-06	-0.171905	0.71212	0.951037	3.65e-05	0.173215	0.228314
14268	Fn1	fibronectin 1	-0.647303	7.83e-06	-0.194911	0.460208	0.131492	0.985476	0.721013	0.0385607
21929	Tnfaip3	TNF alpha induced protein 3	2.79883	1.21e-05	-0.137522	0.998094	-0.110581	0.101404	-0.0923632	0.80189
11749	Anxa6	annexin A6	0.287897	3.29e-05	0.243788	0.00186772	-0.509347	0.00138653	-0.0751097	0.794868
16681	Krt2	keratin 2	-0.873901	5.86e-05	-0.555973	0.0325425	0.844324	0.0886439	0.0653672	0.660923
19221	Ptgfrn	prostaglandin F2 receptor inhibitor	-0.88292	7.81e-05	0.383416	0.0572421	-0.484669	0.0559307	-0.414697	0.133144
110308	Krt5	keratin 5	-0.876852	9.47e-05	0.256967	0.0207833	1.74392	2.24e-05	0.657034	0.0127007
100042025	Gapdh-ps15	glyceraldehyde-3-phosphate dehydrogenase, pseudogene 15	0.609953	0.000113806	0.499416	0.025108	0.257727	0.593246	0.253395	0.218985
15894	Icam1	intercellular adhesion molecule 1	0.555422	0.000273848	0.0654765	0.225308	-0.680774	0.000207122	-0.593536	0.00143394
17381	Mmp12	matrix metallopeptidase 12	0.392583	0.000428004	1.02843	0.000457075	1.73949	0.000264397	0.414901	0.0243057
68239	Krt42	keratin 42	-0.580825	0.00058937	0.186878	0.621652	0.944691	0.00238096	0.139393	0.258785
13033	Ctsd	cathepsin D	-0.351773	0.00089227	-0.652321	0.00416093	-0.27938	0.110324	-0.306163	0.130605
11988	Slc7a2	solute carrier family 7 member 2	1.24482	0.00111739	-0.52851	0.0705984	-1.15178	0.00129926	-0.872072	0.0047374
17904	Myl6	myosin light chain 6	0.587614	0.00116778	0.371028	0.00122723	0.375898	0.0791784	0.486511	0.00543281
53378	Sdcbp	syndecan binding protein	-0.149589	0.00119356	-0.288833	0.00146864	-0.818954	1e-06	-0.639138	9.72e-05
70223	Nars	asparaginyl-tRNA synthetase	1.2557	0.00131121
11747	Anxa5	annexin A5	0.383591	0.00150458	-0.0582946	0.835808	-0.561148	0.0132112	-0.211374	0.743125
12475	Cd14	CD14 molecule	3.05599	0.00209691	-0.176544	0.857974	-0.658122	0.0281237	-0.164282	0.162309
13627	Eef1a1	eukaryotic translation elongation factor 1 alpha 1	0.531588	0.0023914	0.142994	0.882679	-0.281354	0.199346	0.230183	0.151399
22352	Vim	vimentin	0.635496	0.00272603	0.497221	0.00497283	0.165413	0.12765	-0.0631751	0.281643
236539	Phgdh	phosphoglycerate dehydrogenase	0.40476	0.00333592	0.512851	0.00256633	-0.275369	0.722104	-0.439135	0.00840102
21926	Tnf	tumor necrosis factor	2.67289	0.00360709	0.0765386	0.721033	-0.0642335	0.7755	-0.158812	0.698055
16852	Lgals1	galectin 1	0.355058	0.00380063	0.688035	0.00435543	-0.628159	0.0125611	-0.240562	0.27228
18477	Prdx1	peroxiredoxin 1	0.500898	0.00451682	0.695437	0.0124958	0.226427	0.307129	0.282422	0.192136
11928	Atp1a1	ATPase Na+/K+ transporting subunit alpha 1	-0.210675	0.0045995	-0.340859	0.00277144	-0.583613	0.000332234	-0.304003	0.0895646
16835	Ldlr	low density lipoprotein receptor	0.269979	0.00465909	-0.77474	8e-06	-0.76039	0.000617845	-0.0721941	0.203372
20210	Saa3	serum amyloid A3, pseudogene	2.84051	0.00471038	0.242464	0.266646	0.579413	0.426936	-0.124525	0.502041
17254	Slc3a2	solute carrier family 3 member 2	0.254347	0.00638426	-0.150662	0.0770462	-0.794969	0.000370973	-0.273004	0.0276649
12468	Cct7	chaperonin containing TCP1 subunit 7	0.537145	0.00679079	0.753163	0.00881259	0.325362	0.485177	0.0256528	0.857549
100503670	Rpl5	ribosomal protein L5	0.551587	0.00813026	0.772483	0.162304	1.69103	0.229838	1.0395	0.258312
16414	Itgb2	integrin subunit beta 2	-0.176403	0.00833194	-0.199607	0.0400676	-0.632178	3.51e-05	-0.254967	0.106274
16661	Krt10	keratin 10	-0.472924	0.00889749	0.225466	0.0416097	1.0036	0.00113284
13806	Eno1	enolase 1	0.492694	0.00926515	0.577884	0.00124943	0.0637397	0.338126	0.205042	0.347077
16667	Krt17	keratin 17	-0.808971	0.00962326	-0.117189	0.239789	0.995418	0.0196234	-0.28279	0.269185
104112	Acly	ATP citrate lyase	0.524825	0.0100939	0.125006	0.337198	-0.0991082	0.694516	0.147637	0.644779
13629	Eef2	eukaryotic translation elongation factor 2	0.581081	0.0101532	0.502767	0.0238364	0.009197	0.515281	0.207458	0.637267
75617	Rps25	ribosomal protein S25	1.55327	0.0107415	0.607338	0.0445338	2.80046	0.0154365	2.3486	0.0195219
67160	Eef1g	eukaryotic translation elongation factor 1 gamma	0.516871	0.0111433	0.461328	0.016498	-0.0464075	0.481131	-0.548478	0.261724
14067	F5	coagulation factor V	-0.672539	0.0141435	-1.11346	0.000331466	-0.328843	0.238429	-0.397327	0.0186694
20308	Ccl9	C-C motif chemokine ligand 9	0.66441	0.0152903	0.0901282	0.505533	0.840765	0.000969394	0.634088	0.0158041
20115	Rps7	ribosomal protein S7	0.386764	0.0155848	0.689888	0.148456	2.01751	0.000348829	0.173868	0.421762
16664	Krt14	keratin 14	-0.538087	0.0165456	-0.0636922	0.613302	0.583713	0.068394	0.148931	0.735567
22030	Traf2	TNF receptor associated factor 2	2.57322	0.0168865			-0.511204	0.469536	-0.929386	0.231367
20103	Rps5	ribosomal protein S5	0.402787	0.0254688	0.747675	0.0269395	1.41423	0.00338815	0.465478	0.0358405
56431	Dstn	destrin, actin depolymerizing factor	0.957119	0.026134			-0.658619	0.246268
99571	Fgg	fibrinogen gamma chain	-0.663703	0.0290799
56620	Clec4n	C-type lectin domain family 4, member n	-0.7338	0.0318097					-0.121455	0.244881
13885	Esd	esterase D	0.650473	0.033181	0.139474	0.762964	-0.680797	0.0609846	-0.421469	0.186939
22154	Tubb5	tubulin beta class I	0.842535	0.0343865	0.816786	0.0136612	-0.589364	0.341684	-0.27492	0.529578
56403	Syncrip	synaptotagmin binding cytoplasmic RNA interacting protein	-0.534785	0.0352007	0.0614092	0.988905	-0.0450043	0.561797	1.65996	0.0696776
19354	Rac2	Rac family small GTPase 2	0.546163	0.0447793	0.480127	0.198056	0.862936	0.208593	-0.129589	0.436446
12282	Hyou1	hypoxia up-regulated 1	0.378672	0.0564346	-0.675271	0.00524651	-0.526104	0.0728815	-0.241196	0.376055
319150	Hist1h3b	histone cluster 1 H3 family member b	0.520937	0.057868	-0.998758	0.033264	-0.195704	0.423542	0.540107	0.0167496
15160	Serpind1	serpin family D member 1	0.348755	0.0601306			0.173901	0.522861	-0.61447	0.0489576
114584	Clic1	chloride intracellular channel 1	0.594675	0.0629339	0.883523	0.0285006	-0.494492	0.345235	-0.107425	0.858119
68015	Trap1	TNF receptor associated protein 1	0.768081	0.0683978	1.25107	0.0215465	0.321906	0.380118	0.266958	0.47662
78388	Mvp	major vault protein	-0.278964	0.0945778	-0.986437	0.000494109	-0.349929	0.0152502	0.0310381	0.699246
20304	Ccl5	C-C motif chemokine ligand 5	3.19647	0.101607	1.43025	0.0336959	0.774159	0.199605	0.250251	0.934438
18570	Pdcd6	programmed cell death 6	0.13631	0.104973	-0.304471	0.0324358	-0.719544	0.00870705	-0.579845	0.0147714
19261	Sirpa	signal regulatory protein alpha	-0.666228	0.114526	-0.510165	0.0498237	-0.706984	0.00879836	-0.351328	0.167907
12833	Col6a1	collagen type VI alpha 1 chain	-0.657824	0.140067	-0.251005	0.236353	-0.770185	0.0471137	-0.55737	0.0652627
19941	Rpl26	ribosomal protein L12	-0.517287	0.148621	-0.164625	0.453511	0.988806	0.0289393	-0.0413387	0.842563
22371	Vwf	von Willebrand factor	-0.355871	0.151344	0.701871	0.0449004	-0.847582	0.160081	-0.43054	0.554665
18458	Pabpc1	poly(A) binding protein cytoplasmic 1	0.507332	0.154507	0.58755	0.041283	0.10024	0.79377	0.0743295	0.68759
239667	Dip2b	disco interacting protein 2 homolog B	-0.641431	0.155739			-1.42357	0.0385551	-0.566712	0.364657
16665	Krt15	keratin 15	-0.701016	0.156468	-1.33446	0.116918	-0.425768	0.922439	-0.64177	0.046606
21894	Tln1	talin 1	0.0526577	0.17395	0.538657	1.52e-05	-0.205619	0.423525	-0.152826	0.154061
64138	Ctsz	cathepsin Z	0.566237	0.180244	0.390765	0.282035	0.542656	0.748455	0.571868	0.0322141
102642959	LOC102642959	60S ribosomal protein L32-like	0.247591	0.18988			1.0192	0.00293843	-0.155159	0.556985
16666	Krt16	keratin 16	-0.114262	0.211365	0.530743	0.0161811	1.99054	6.74e-06	0.329984	0.182786
57875	Angptl4	angiopoietin like 4	-0.415355	0.236476	0.031452	0.960309	2.5171	0.00621495	-0.0189986	0.942897
20102	Rps4x	ribosomal protein S4 X-linked	0.107952	0.249194	-0.148763	0.96113	1.52688	0.00452985	0.849216	0.01601
12462	Cct3	chaperonin containing TCP1 subunit 3	0.61511	0.258538	0.8626	0.0157473	0.446011	0.335305	-0.135535	0.630328
11750	Anxa7	annexin A7	0.397744	0.261108			-0.732897	0.0468544
11432	Acp2	acid phosphatase 2, lysosomal	-0.647157	0.261269	-1.35808	0.0133293	-0.7233	0.0896308	-0.931647	0.261607
18807	Pld3	phospholipase D family member 3	-0.515344	0.266981	0.907979	0.0488439	0.0406527	0.527336	-0.0190169	0.766608
21454	Tcp1	t-complex 1	0.269004	0.268624	-0.0743408	0.704471	-0.138273	0.444444	-0.802035	0.00565243
17988	Ndrg1	N-myc downstream regulated 1	0.306719	0.316925	1.23547	0.0149511	0.828054	0.158114	0.232816	0.640981
17698	Msn	moesin	0.358894	0.381937	0.77773	0.0356087	0.442704	0.595313	0.158571	0.713949
11857	Arhgdib	Rho GDP dissociation inhibitor beta	0.161384	0.384395	0.110083	0.376847	-1.02305	0.0238535	-0.443608	0.093888
22145	Tuba4a	tubulin, alpha 4A	0.197734	0.422526	0.647862	0.00484718	0.281924	0.0935171	-0.0631201	0.440382
22019	Tpp2	tripeptidyl peptidase 2	-0.252441	0.466774	0.155826	0.610804	-0.66163	0.0499379	0.264207	0.634849
71436	Flrt3	fibronectin leucine rich transmembrane protein 3	0.594305	0.51261	-0.73488	0.558666	-1.13806	0.0417955	-1.34587	0.386826
16412	Itgb1	integrin subunit beta 1	-0.0594404	0.529105	-0.115753	0.161569	-0.539399	0.0129348	-0.194037	0.371153
23825	Banf1	barrier to autointegration factor 1	-0.354269	0.560491	-0.940886	0.0142685	-0.752379	0.246803	-0.214971	0.618487
15162	Hck	HCK proto-oncogene, Src family tyrosine kinase	-0.271052	0.572555			-1.09958	0.00722624	0.555326	0.258619
11603	Agrn	agrin	0.021284	0.597792	-2.6352	1e-06	-0.657014	3.41e-05	-0.36216	0.00179817
26961	Rpl8	ribosomal protein L8	0.0279144	0.599137	0.525155	0.221872	2.35779	0.00223388	1.52903	0.00618979
18772	Pkp1	plakophilin 1	-0.15578	0.604878	0.111829	0.490011	1.98262	0.00732193	0.965583	0.0551907
19271	Ptprj	protein tyrosine phosphatase, receptor type J	0.194834	0.610863	-0.835294	0.0292127	-0.996642	0.0295057	-1.07077	0.007957
21818	Tgm3	transglutaminase 3	-0.422503	0.621819	-0.502497	0.349466	0.77847	0.0354005	-0.391055	0.716914
22388	Wdr1	WD repeat domain 1	0.558452	0.63174	3.15675	0.119413	1.68812	0.005766	0.519819	0.429125
19988	Rpl6	ribosomal protein L6	-0.242302	0.63779	0.108654	0.659074	0.681201	0.309635	0.698454	0.0351184
11886	Asah1	N-acylsphingosine amidohydrolase 1	-0.0820878	0.671173	-0.162014	0.734722	0.641004	0.0169974
15519	Hsp90aa1	heat shock protein 90 alpha family class A member 1	0.121575	0.700841	0.680201	0.018734	-0.229771	0.592318	0.0708028	0.78239
27050	Rps3	ribosomal protein S3	0.00640011	0.766174	0.0780712	0.145929	1.26249	0.0167229	0.00953823	0.99054
12527	Cd9	CD9 molecule	-0.0729798	0.797833	-0.46836	0.00289629	-0.923261	0.000210997	-0.509144	0.00300587
67332	Snrpd3	small nuclear ribonucleoprotein D3 polypeptide	0.169617	0.798757	0.224995	0.326337	0.435256	0.0159666	2.90575	0.00390794
54683	Prdx5	peroxiredoxin 5	-0.0960286	0.817855	-0.375884	0.714888	-0.651617	0.036469	-0.852041	0.0562109
13014	Cstb	cystatin B	-0.119616	0.822107	0.108606	0.756095	-1.03506	0.0434907	-0.540207	0.389985
110954	Rpl10	ribosomal protein L10	0.140018	0.839072	-0.213842	0.645952	1.68048	0.00675692	0.74662	0.221252
20641	Snrpd1	small nuclear ribonucleoprotein D1 polypeptide	0.0968838	0.844507	0.232933	0.437556	0.22038	0.394043	2.6626	0.000344378
51810	Hnrnpu	heterogeneous nuclear ribonucleoprotein U	0.0423508	0.877946	0.0303986	0.556379	1.07681	0.0385709	1.87973	0.0151939
19035	Ppib	peptidylprolyl isomerase B	-0.115169	0.890613	0.646838	0.0692319	0.739261	0.0464728	-0.0630651	0.830592
105244208	LOC105244208	40S ribosomal protein S6	0.026032	0.951519	0.671047	0.0295872	2.08689	0.00218933	1.34768	0.000686183
20091	Rps3a1	ribosomal protein S3A1	0.0696802	0.979222	0.234332	0.446181	1.43661	0.00567116	0.678573	0.0224927
68052	Rps13	ribosomal protein S13	-0.011976	0.994258	-0.372577	0.103805	1.8665	0.00867973	0.0851526	0.271188
19981	Rpl37a	ribosomal protein L26			0.952859	0.00565747
11804	Aplp2	amyloid beta precursor like protein 2							0.924664	0.00137591
14061	F2	coagulation factor II, thrombin			0.966603	6.06e-05	1.84368	1e-06	-0.0455378	0.659692
16832	Ldhb	lactate dehydrogenase B					1.14995	0.0114241
269261	Rpl12	ribosomal protein L15					1.01779	0.00935395	0.752383	0.0132111
12469	Cct8	chaperonin containing TCP1 subunit 8			0.728798	0.0160747	0.149969	0.461974	0.00636368	0.523183
621823	Psme2b	protease (prosome, macropain) activator subunit 2B					-0.119936	0.836443	1.16804	0.0157682
69189	Mcemp1	mast cell expressed membrane protein 1					-0.340155	0.193514	-0.53902	0.015143
16592	Fabp5	fatty acid binding protein 5					-0.545484	0.0154845	-0.131323	0.0608602
16784	Lamp2	lysosomal associated membrane protein 2			0.0142189	0.943974	-0.551509	0.026931
66871	Cpne8	copine 8			-0.731697	0.032886	-0.570645	0.0149251	-0.424423	0.203939
12631	Cfl1	cofilin 1			0.263167	0.0763127	-0.673138	0.032572
67702	Rnf149	ring finger protein 149					-0.743748	0.0236843	-0.465313	0.138762
232345	A2m	alpha-2-macroglobulin					-0.753906	0.00555595
18187	Nrp2	neuropilin 2					-0.995149	0.0422247
